# Supplementary material for: Harnessing hypervalent iodonium ylides as carbene precursors: C–H activation of N-methoxybenzamides with a Rh(iii)-catalyst
Source: Royal Society of Chemistry journal article supplement (doi:10.1039/d0cc06038k), 2020-01-01
Supplement: d0cc06038k1.pdf [file d0cc06038k1.pdf]

## **Harnessing hypervalent iodonium ylide as carbene precursors: C-H activation of N-methoxybenzamides by Rh(III)-catalyst**

Sivakalai Mayakrishnan, <sup>a</sup> Masilamani Tamizmani, <sup>b</sup> Narayanan Uma Maheswari <sup>a\*</sup>

<sup>a</sup> Organic & Bio-organic Chemistry Laboratory, CSIR-Central Leather Research Institute, Adyar, Chennai-600020, India, Corresponding author E-mail: [umamaheswari@clri.res.in](mailto:umamaheswari@clri.res.in)

<sup>b</sup> State Key Laboratory of Organometallic Chemistry, Shanghai Institute of Organic Chemistry, Chinese Academy of Sciences, 345 Lingling Road, Shanghai 200032, China

# **Supporting Information**

## Contents

|     |                                                                                                   |     |
|-----|---------------------------------------------------------------------------------------------------|-----|
| 1.  | General remarks .....                                                                             | 3   |
| 2.  | Experimental procedure for the synthesis of N-Methoxy benzamide (1a- w) <sup>1</sup> .....        | 3   |
| 3.  | Experimental procedure for the synthesis of Hypervalent iodonium ylides (2a-k) <sup>2</sup> ..... | 4   |
| 4.  | Optimization table.....                                                                           | 5   |
| 5.  | General experimental procedure for the Synthesis of phenanthridine-1,6(2H,5H)-dione .....         | 8   |
| 6.  | Competitive Experiments.....                                                                      | 8   |
| 7.  | The preliminary mechanistic studies .....                                                         | 9   |
| 8.  | Synthesis of 1a- <i>d</i> <sub>5</sub> .....                                                      | 11  |
| 9.  | Reaction of N-methoxybenzamide-2,3,4,5,6- <i>d</i> <sub>5</sub> with 1a.....                      | 12  |
| 10. | Parallel KIE experiments .....                                                                    | 12  |
| 11. | Control reactions .....                                                                           | 13  |
| 12. | Gram scale synthesis.....                                                                         | 15  |
| 13. | Synthetic transformation .....                                                                    | 15  |
| 14. | Experimental procedure for 1a with 3-(phenyl- <i>I</i> -iodaneylidene) chromane-2,4-dione .....   | 16  |
| 15. | Optimization of reaction condition for 4a with diphenylacetylene .....                            | 16  |
| 16. | General procedure for synthesis of Dihydropyrano phenanthridin-11(8H)-one (6a-g) .....            | 17  |
| 17. | Mechanism for formation of compound 6a.....                                                       | 18  |
| 18. | Regioselectivity of reaction 6f.....                                                              | 19  |
| 19. | X-ray crystallographic data of compound 3s.....                                                   | 20  |
| 20. | X-ray crystallographic data of compound 6c.....                                                   | 21  |
| 21. | DFT Calculations .....                                                                            | 22  |
| 22. | Optical Properties of Compounds (6a-e).....                                                       | 39  |
| 23. | UV-vis absorption and emission spectra of 6a-e (in DCM solution and thin film state) .....        | 40  |
| 24. | <sup>1</sup> H, <sup>13</sup> C NMR and HRMS spectral data for compounds 3a-3ag.....              | 45  |
| 25. | <sup>1</sup> H and <sup>13</sup> C NMR spectral data for compounds 3a' .....                      | 56  |
| 26. | <sup>1</sup> H and <sup>13</sup> C NMR spectral data for compounds 4a.....                        | 57  |
| 27. | <sup>1</sup> H, <sup>13</sup> C NMR and HRMS spectral data for compounds (6a-e) .....             | 57  |
| 28. | NMR and HRMS spectrum of synthesized compounds .....                                              | 61  |
| 29. | References.....                                                                                   | 176 |

## 1. General remarks

All catalysts and  $[\text{RhCp}^*\text{Cl}_2]_2$ , benzoyl chloride derivatives, methoxy amine hydrochloride, diacetoxy iodo benzene and other starting materials were purchased from commercial sources and used as received. Unless otherwise mentioned, all commercially obtained reagents and solvents were used as received. All reactions were carried out under  $\text{N}_2$  atmosphere in flame-dried glassware. Syringes which were used to transfer solvents or reagents were purged with nitrogen prior to use. Thin layer chromatogram (TLC) was performed on precoated aluminium sheets of silica gel 60 F254 of 0.2 mm thickness and visualized via UV. The column chromatographic purifications were performed using  $\text{SiO}_2$  (100–200 mesh ASTM) from Merck if not indicated otherwise. Melting points were determined in capillary tubes and are uncorrected. Nuclear Magnetic Resonance (NMR) spectra were recorded on 400 MHz ( $^1\text{H}$  NMR) and 100 MHz ( $^{13}\text{C}$  NMR) instrument in  $\text{CDCl}_3$  solutions referenced to TMS or solvent residual peak. High resolution mass spectra (HRMS-ESI) were recorded using Thermo Scientific Exactive Orbitrap mass spectrometer. UV-visible absorption spectra were measured using Shimadzu UV-1800 spectrophotometer. The steady state fluorescence measurements were recorded using Varian Cary Eclipse fluorescence spectrophotometer.

## 2. Experimental procedure for the synthesis of N-Methoxy benzamide (1a- w)<sup>1</sup>

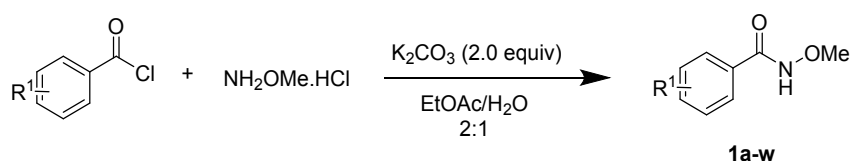

**Scheme ESI-1.** Synthesis of N-Methoxy benzamide derivatives

Taken in a 100 mL double round bottom flask fitted with a magnetic stirrer, solution of  $\text{K}_2\text{CO}_3$  (2.0 equiv) in mixture of  $\text{EtOAc}/\text{H}_2\text{O}$  50 mL (2:1) was added O-methyl hydroxylamine hydrochloride (1.2 equiv). The resulting solution was cooled to  $0\text{ }^\circ\text{C}$ , followed by dropwise addition of substituted (24 types) benzoyl chloride (1.0 equiv). The reaction mixture kept at room temperature and stirred for overnight. The reaction was monitored by TLC. After the completion, the reaction mixture was diluted with  $\text{EtOAc}$ . The organic phase was separated

and the aqueous phase was extracted with EtOAc (30 mL × 3). The combined organic layers were dried over anhydrous Na<sub>2</sub>SO<sub>4</sub>, filtered and evaporated under reduced pressure. The pure products were obtained by column chromatography using silica gel (100-200 mesh).

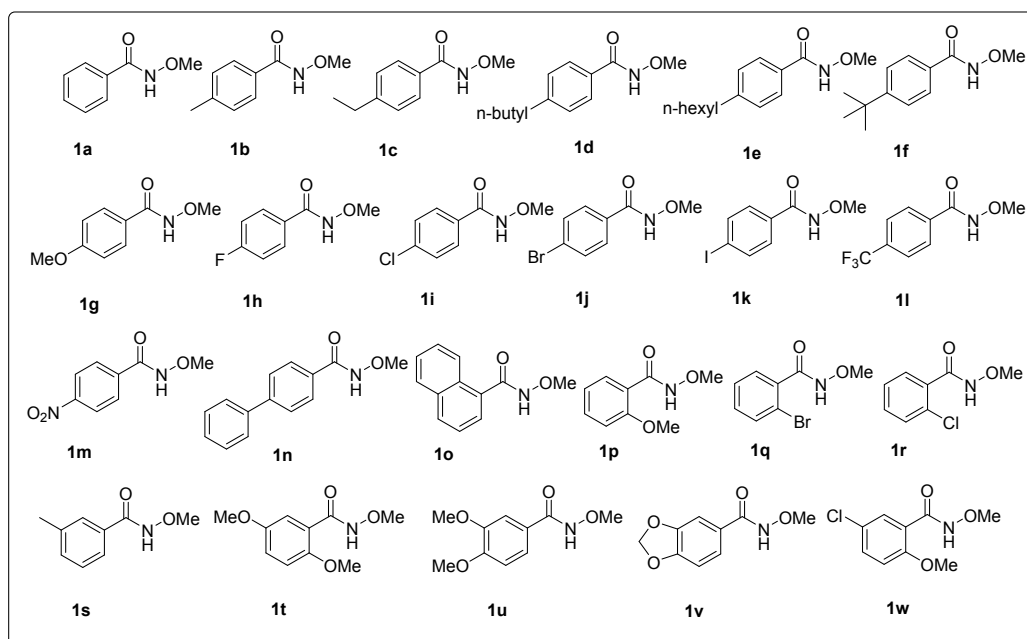

Chemical structure of the synthesized N-methoxy benzamide derivatives

### 3. Experimental procedure for the synthesis of Hypervalent iodonium ylides (2a-k)<sup>2</sup>

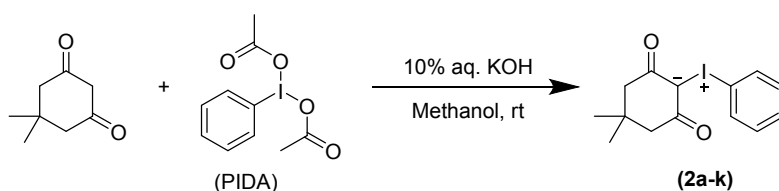

**Scheme ESI-2.** Synthesis of differently substituted hypervalent iodonium yields

Taken in a 100 mL round bottom flask fitted with a magnetic stirrer, added solution of cyclic 1,3-dione (1.0 equiv) in 30 mL methanol at room temperature added 20 mL of 10% aqueous solution of KOH followed by addition of diacetoxy iodobenzene (1.2 equiv) in 40 mL methanol. The reaction mixture was stirred for 2 hours at room temperature and then quenched with ice cold water. The resulting white precipitate was filtered and mother solution was extracted with dichloromethane, then washed with water three times, dried over anhydrous Na<sub>2</sub>SO<sub>4</sub>, filtered and concentrated under reduced pressure. The resultant white solid was mixed with



the first crop and the mixture recrystallized from DCM/Hexane the compound **2a-k** white solid was obtained and can be directly used further without purification.

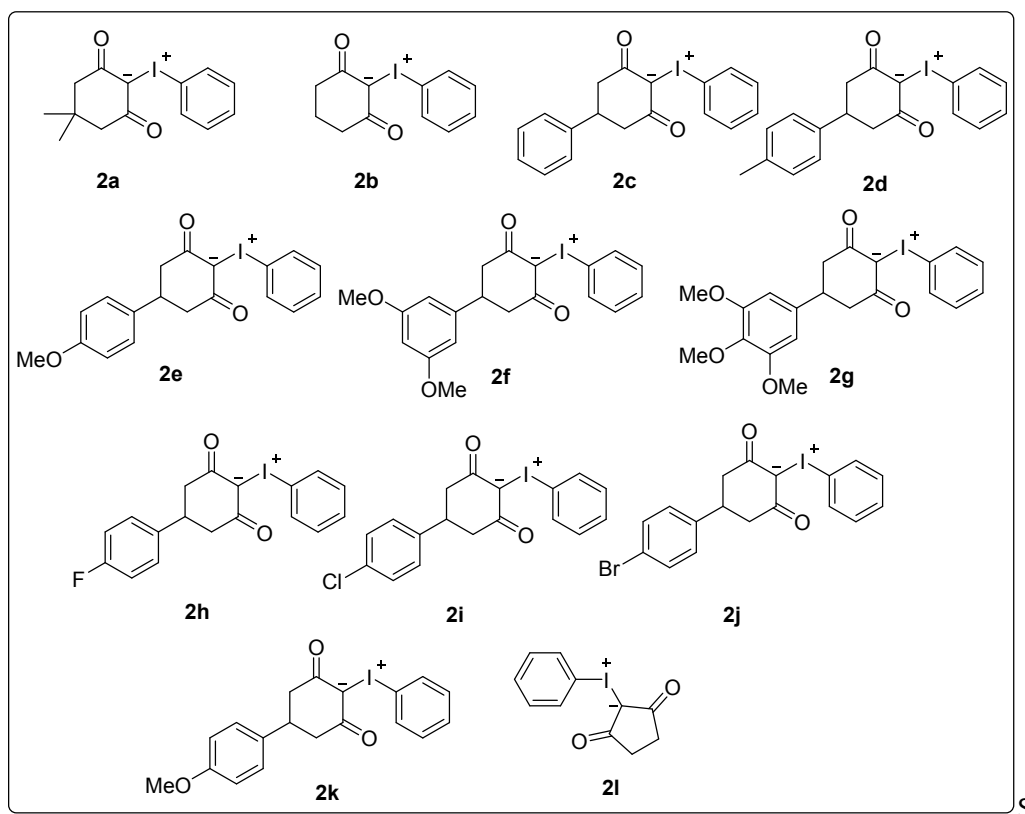

Synthesized Hypervalent iodonium ylides **2a-k**

#### 4. Optimization table

In order to find the suitable condition for the Rh(III)-catalysed ortho C-H activation reaction using HVI ylide, we have chosen the coupling of N-methoxybenzamide **1a** with 5,5-dimethyl-2-(phenyl-iodanylidene)cyclohexane-1,3-dione **2a** as a model and tested under various catalysts and conditions. Initially, the utilization of  $[\text{RhCp}^*\text{Cl}_2]_2$  (5 mol%),  $\text{Cu}(\text{OAc})_2 \cdot \text{H}_2\text{O}$  (1.0 equiv) and  $\text{AgSbF}_6$  (20 mol %) as the catalytic system in 1,2-Dichloroethane (DCE) at 110 °C for 12 h afforded the desired dihydrophenanthridine product **3** with 27% of isolated yield. Meanwhile, dihydro-1H-benzo[c]chromene **3'** was observed as a by-product in 15% yield (**Table 1, entry 1**). The structure of the products **3** and **3'** were confirmed by using various analytical techniques. Among subsequent trials with various polar, non-polar and aprotic solvents, acetone was found to be the best choice to yield **3** in 60% and **3'** in 8%,

respectively (**Table 1, entry 2–12**). Similarly, we screened various oxidants (**Table 1, entry 13–18**). However, the best results were obtained when CsOAc was used as an oxidant and provide the desired product **3** in 95% (**3'** was not observed in the reaction). The other oxidants KOAc, AcOH and PivOH provided more inferior results. The reaction was also sensitive to nature of the additives (**Table 1, entry 19–22**). The use of aromatic solvents instead of acetone led to the formation of mixture products **3** and **3'** with a lesser yield (**Table 1, entry 23–25**). The reaction was also tested under air nevertheless the yield did not improve (**Table 1, entry 26**). While the reaction was tested without oxidant and additive there is no significant improvement. Therefore, oxidant and additive have played a crucial role in the reaction (**Table 1, entry 27–28**). The trials were made by replacing the complex  $[\text{RhCp}^*(\text{CH}_3\text{CN})]_2$  ( $\text{SbF}_6$ ) instead of  $[\text{RhCp}^*\text{Cl}_2]_2$  led to 80% of **3a** was isolated (**Table 1, entry 29**). Furthermore, other transition metal complexes such as  $\text{Cp}^*\text{Co}(\text{CO})\text{I}_2$ ,  $[\text{RuCl}_2(\text{p-cymene})]_2$  and  $\text{Pd}(\text{OAc})_2$  were found to be not an efficient catalyst for this reaction (**Table 1 entries 30–32**).

**ESI Table 1.** Reaction optimization of N-methoxybenzamide **1a** with 5,5-dimethyl-2-(phenyl-1*l*-iodanylidene) cyclohexane-1,3-dione **2a**<sup>a</sup>

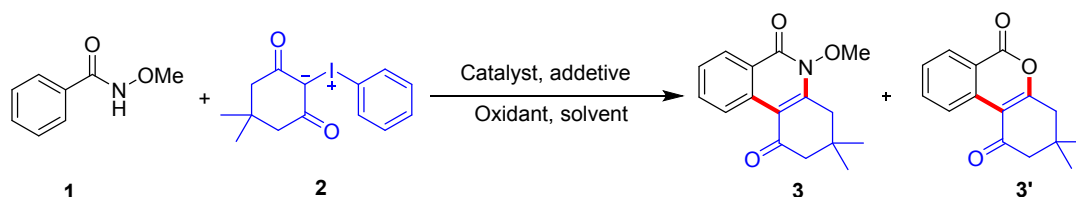

| S.No | Catalyst                       | Base                                               | Additive         | Solvent      | Yield of <b>3</b> and <b>3'</b> (%) <sup>b</sup> |       |
|------|--------------------------------|----------------------------------------------------|------------------|--------------|--------------------------------------------------|-------|
| 1    | $[\text{RhCp}^*\text{Cl}_2]_2$ | $\text{Cu}(\text{OAc})_2 \cdot \text{H}_2\text{O}$ | $\text{AgSbF}_6$ | 1,2-DCE      | 27                                               | 10    |
| 2    | $[\text{RhCp}^*\text{Cl}_2]_2$ | $\text{Cu}(\text{OAc})_2 \cdot \text{H}_2\text{O}$ | $\text{AgSbF}_6$ | THF          | 27                                               | ---   |
| 3    | $[\text{RhCp}^*\text{Cl}_2]_2$ | $\text{Cu}(\text{OAc})_2 \cdot \text{H}_2\text{O}$ | $\text{AgSbF}_6$ | 1,4-Dioxan   | 15                                               | >5    |
| 4    | $[\text{RhCp}^*\text{Cl}_2]_2$ | $\text{Cu}(\text{OAc})_2 \cdot \text{H}_2\text{O}$ | $\text{AgSbF}_6$ | Acetonitrile | trace                                            | trace |
| 5    | $[\text{RhCp}^*\text{Cl}_2]_2$ | $\text{Cu}(\text{OAc})_2 \cdot \text{H}_2\text{O}$ | $\text{AgSbF}_6$ | DMF          | trace                                            | 12    |
| 6    | $[\text{RhCp}^*\text{Cl}_2]_2$ | $\text{Cu}(\text{OAc})_2 \cdot \text{H}_2\text{O}$ | $\text{AgSbF}_6$ | DMSO         | trace                                            | 8     |
| 7    | $[\text{RhCp}^*\text{Cl}_2]_2$ | $\text{Cu}(\text{OAc})_2 \cdot \text{H}_2\text{O}$ | $\text{AgSbF}_6$ | IPA          | 16                                               | trace |
| 8    | $[\text{RhCp}^*\text{Cl}_2]_2$ | $\text{Cu}(\text{OAc})_2 \cdot \text{H}_2\text{O}$ | $\text{AgSbF}_6$ | MeOH         | 12                                               | 20    |

|    |                                          |                                        |                          |                        |           |       |
|----|------------------------------------------|----------------------------------------|--------------------------|------------------------|-----------|-------|
| 9  | [RhCp*Cl <sub>2</sub> ] <sub>2</sub>     | Cu(OAc) <sub>2</sub> .H <sub>2</sub> O | AgSbF <sub>6</sub>       | <i>Ethanol</i>         | trace     | trace |
| 10 | [RhCp*Cl <sub>2</sub> ] <sub>2</sub>     | Cu(OAc) <sub>2</sub> .H <sub>2</sub> O | AgSbF <sub>6</sub>       | <i>t</i> -AmOH         | 24        | 10    |
| 11 | [RhCp*Cl <sub>2</sub> ] <sub>2</sub>     | Cu(OAc) <sub>2</sub> .H <sub>2</sub> O | AgSbF <sub>6</sub>       | <i>HFIP</i>            | 30        | 30    |
| 12 | [RhCp*Cl <sub>2</sub> ] <sub>2</sub>     | Cu(OAc) <sub>2</sub> .H <sub>2</sub> O | AgSbF <sub>6</sub>       | Acetone                | 60        | 8     |
| 13 | [RhCp*Cl <sub>2</sub> ] <sub>2</sub>     | NaOAc                                  | AgSbF <sub>6</sub>       | Acetone                | 50        | trace |
| 14 | [RhCp*Cl <sub>2</sub> ] <sub>2</sub>     | AgOAc                                  | AgSbF <sub>6</sub>       | Acetone                | 25        | 38    |
| 15 | <b>[RhCp*Cl<sub>2</sub>]<sub>2</sub></b> | <b>CsOAc</b>                           | <b>AgSbF<sub>6</sub></b> | <b>Acetone</b>         | <b>95</b> | trace |
| 16 | [RhCp*Cl <sub>2</sub> ] <sub>2</sub>     | KOAc                                   | AgSbF <sub>6</sub>       | Acetone                | 45        | 20    |
| 17 | [RhCp*Cl <sub>2</sub> ] <sub>2</sub>     | AcOH                                   | AgSbF <sub>6</sub>       | Acetone                | 56        | trace |
| 18 | [RhCp*Cl <sub>2</sub> ] <sub>2</sub>     | PivOH                                  | AgSbF <sub>6</sub>       | Acetone                | trace     | trace |
| 19 | [RhCp*Cl <sub>2</sub> ] <sub>2</sub>     | CsOAc                                  | AgBF <sub>4</sub>        | Acetone                | 65        | 10    |
| 20 | [RhCp*Cl <sub>2</sub> ] <sub>2</sub>     | CsOAc                                  | AgOTf                    | Acetone                | 72        | 12    |
| 21 | [RhCp*Cl <sub>2</sub> ] <sub>2</sub>     | CsOAc                                  | CuOTf                    | Acetone                | 34        | 6     |
| 22 | [RhCp*Cl <sub>2</sub> ] <sub>2</sub>     | CsOAc                                  | KPF <sub>6</sub>         | Acetone                | 40        | trace |
| 23 | [RhCp*Cl <sub>2</sub> ] <sub>2</sub>     | CsOAc                                  | AgSbF <sub>6</sub>       | Toluene                | 23        | 39    |
| 24 | [RhCp*Cl <sub>2</sub> ] <sub>2</sub>     | CsOAc                                  | AgSbF <sub>6</sub>       | Chlorobenzene          | 52        | 55    |
| 25 | [RhCp*Cl <sub>2</sub> ] <sub>2</sub>     | CsOAc                                  | AgSbF <sub>6</sub>       | <i>Dichlorobenzene</i> | 48        | 37    |
| 26 | [RhCp*Cl <sub>2</sub> ] <sub>2</sub>     | CsOAc                                  | AgSbF <sub>6</sub>       | Acetone                | trace     | trace |
| 27 | [RhCp*Cl <sub>2</sub> ] <sub>2</sub>     | -                                      | AgSbF <sub>6</sub>       | Acetone                | trace     | trace |
| 28 | [RhCp*Cl <sub>2</sub> ] <sub>2</sub>     | CsOAc                                  | -                        | Acetone                | 12        | trace |
| 29 | [RhCp*(CH <sub>3</sub> CN)] <sub>2</sub> | CsOAc                                  | -                        | Acetone                | 80        | trace |
| 30 | Cp*Co(CO)I <sub>2</sub>                  | CsOAc                                  | AgSbF <sub>6</sub>       | Acetone                | trace     | trace |

|    |                                                      |       |                    |         |       |       |
|----|------------------------------------------------------|-------|--------------------|---------|-------|-------|
| 31 | [Ru( <i>p</i> -cymene)Cl <sub>2</sub> ] <sub>2</sub> | CsOAc | AgSbF <sub>6</sub> | Acetone | trace | trace |
| 32 | Pd(OAc) <sub>2</sub>                                 | CsOAc | AgSbF <sub>6</sub> | Acetone | trace | trace |

<sup>a</sup> **Reaction conditions; 1a** (0.6 mmol), **2a** (0.6 mmol), catalyst (3.0 mol%), oxidant (1.0 equiv.) and additive (15 mol%) in solvent (5.0 mL) at 85 °C or refluxed for 12 h. <sup>b</sup> Isolated yields. The optimized condition is highlighted in bold letters.

## 5. General experimental procedure for the Synthesis of phenanthridine-1,6(2H,5H)-dione

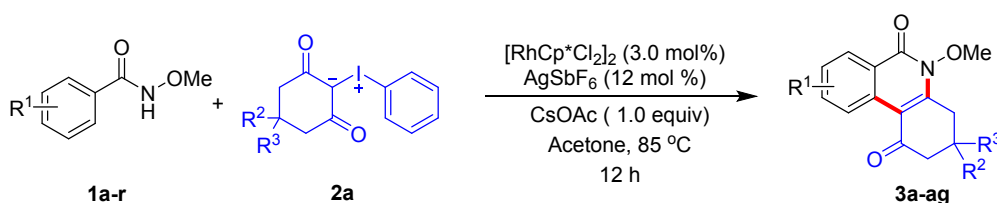

**Scheme ESI-3**

A pressure tube was charged with substituted N-methoxybenzamide **1a-r** (0.6 mmol) and 5,5-dimethyl-2-(phenyl-13-iodanylidene) cyclohexane-1,3-dione **2a** (0.6 mmol), [RhCp\*Cl<sub>2</sub>]<sub>2</sub> (3.0 mol %), AgSbF<sub>6</sub> (12 mol %), CsOAc (1.0 equiv) and Acetone 5.0 mL. The reaction mixture was stirred at 85 °C for 12 h under nitrogen atmosphere. After cooling to room temperature, the reaction mixture was diluted with CH<sub>2</sub>Cl<sub>2</sub>, filtered through celite and the filtrate was concentrated under reduced pressure. The residue was purified by silica gel chromatography using Ethyl acetate/Hexane as eluent. The desired product was a colourless solid **3a-ag** obtained in 38-99% of yield.

## 6. Competitive Experiments

A pressure tube was charged with N,4-dimethoxybenzamide **1g** (108 mg, 0.6 mmol), 4-fluoro-N-methoxybenzamide **1h** (101 mg, 0.6 mmol), 5,5-dimethyl-2-(phenyl-13-iodanylidene)cyclohexane-1,3-dione **2a** (207 mg, 0.6 mmol), [RhCp\*Cl<sub>2</sub>]<sub>2</sub> (11.0 mg, 3 mol %), AgSbF<sub>6</sub> (24.5 mg, 12.0 mol %), CsOAc (114.4 mg, 1.0 equiv) and Acetone 6.0 mL. The reaction mixture was stirred at 85 °C for 12 h under nitrogen atmosphere. After cooling to room temperature, the reaction mixture was diluted with CH<sub>2</sub>Cl<sub>2</sub>, filtered through celite and the

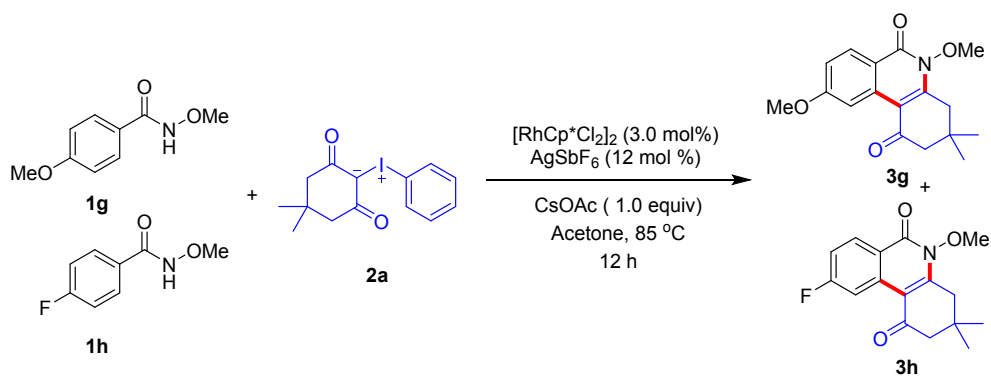

**Scheme ESI-4.**

filtrate was concentrated under reduced pressure. The residue was purified by silica gel chromatography using Ethyl acetate/Hexane as eluent. Desired product is a colourless solid **3g** and **3h** isolated as a mixture of compounds.  $^1\text{H}$  NMR analysis confirmed that the annulated product originating from the electron-rich benzamide **1g** was obtained in higher proportion 1.0:0.33 when compared with **1h**.

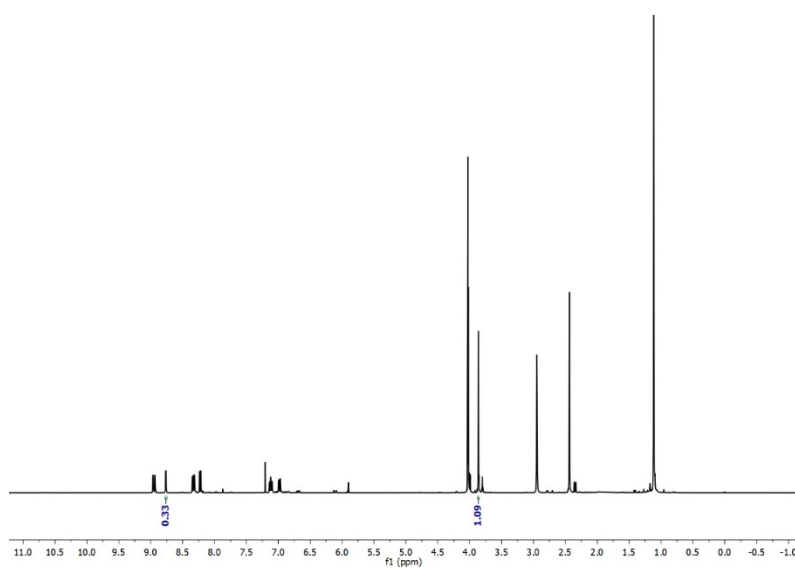

$^1\text{H}$  NMR spectrum of compound **3g** in  $\text{CDCl}_3$

## 7. The preliminary mechanistic studies

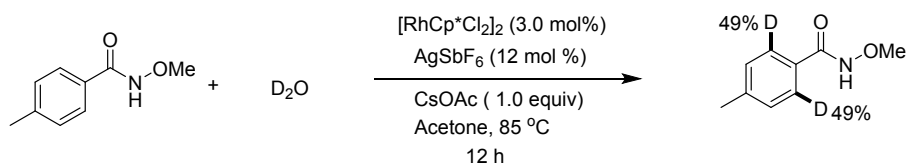

**Scheme ESI-5**

- (i) A pressure tube was charged with N-methoxy-4-methylbenzamide **1b** 99.0 mg (0.6 mmol), [RhCp\*Cl<sub>2</sub>]<sub>2</sub> 11.0 mg (3.0 mol %), AgSbF<sub>6</sub> 24.5 mg, (12.0 mol %), CsOAc (115.0 mg, 1.0 equiv), D<sub>2</sub>O (2.5 equiv) and Acetone 5.0 mL. The reaction mixture was stirred at 85 °C for 12 h under nitrogen atmosphere. After cooling to room temperature, the reaction mixture was diluted with CH<sub>2</sub>Cl<sub>2</sub>, filtered through celite and the filtrate was concentrated under reduced pressure. The residue was purified by silica gel chromatography using Ethyl acetate/Hexane as eluent. Desired product is a colourless solid **D-1b** obtained in 92% of yield. The deuterium incorporated 49% at the protons attached to C-2' and C-6' in the recovered both ortho position of N-methoxy-4-methylbenzamide. In addition to that results clearly reveals the evidence of C-H bond activation as a key intermediate enabling the reversible process.

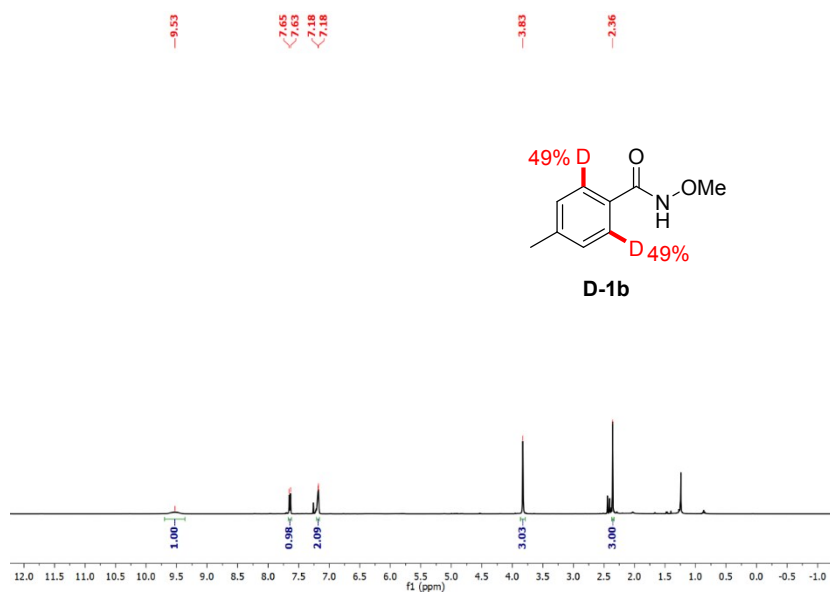

<sup>1</sup>H NMR spectrum of compound **1b-d<sub>2</sub>** in CDCl<sub>3</sub>

## 8. Synthesis of 1a-d<sub>5</sub>

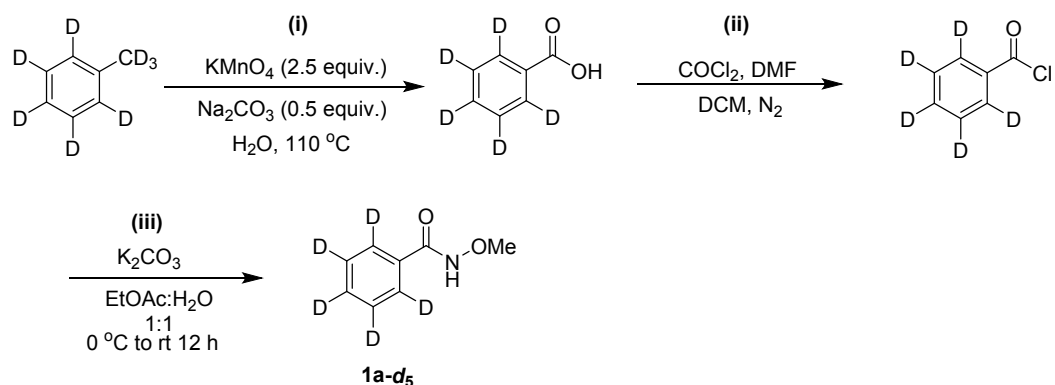

Scheme ESI-6

- A round bottom flask equipped with a stirrer bar and reflux condenser was charged with d<sub>8</sub>-toluene 5.00 g (99.9% of D, 1.0 equiv.), KMnO<sub>4</sub> 20g (2.5 equiv.), Na<sub>2</sub>CO<sub>3</sub> 2.64 g (0.5 equiv.) in distilled water 150mL. The system was refluxed for 8 h and cooled to room temperature. The mixture was filtered through a pad of celite, acetified with 12 M HCl and extracted with Dichloromethane. The combined organic layer was washed with water three times. The crude product was recrystallized from water to yield 52% of benzoic-2,3,4,5,6-d<sub>5</sub> acid as a fine white solid.
- To a solution of the benzoic-2,3,4,5,6-d<sub>5</sub> acid 1.00 g (1.0 equiv.) in dry dichloromethane 50 mL at 0 °C under N<sub>2</sub> was added dropwise oxalyl chloride 1.3 mL (1.5 equiv.) followed by adding catalytic amount of anhydrous DMF 5 drops. The reaction was allowed to stir continuously at room temperature for 5 hours. The solvent was then removed under reduced pressure to afford the corresponding crude deuterated acid chloride is a viscous liquid. Then, proceeded to next step without further purification.
- Taken in a 100 mL double round bottom flask fitted with a magnetic stirrer, solution of K<sub>2</sub>CO<sub>3</sub> (2.0 equiv.) in a mixture of EtOAc/H<sub>2</sub>O (50 mL 2:1) was added O-methyl hydroxylamine hydrochloride (1.2 equiv.). The resulting solution was cooled to 0 °C, followed by dropwise addition of benzoyl-d<sub>5</sub> chloride (1.0 equiv.). The reaction mixture was warmed to room temperature and stirred overnight. The reaction was monitored by TLC. After completion, the reaction mixture was diluted

with EtOAc. The organic phase was separated and the aqueous phase was extracted with EtOAc (30 mL×3). The combined organic layers were dried over anhydrous Na<sub>2</sub>SO<sub>4</sub>, filtered and evaporated under reduced pressure. The pure products were obtained by column chromatography using silica gel (100-200 mesh).

## 9. Reaction of N-methoxybenzamide-2,3,4,5,6-d<sub>5</sub> with 1a

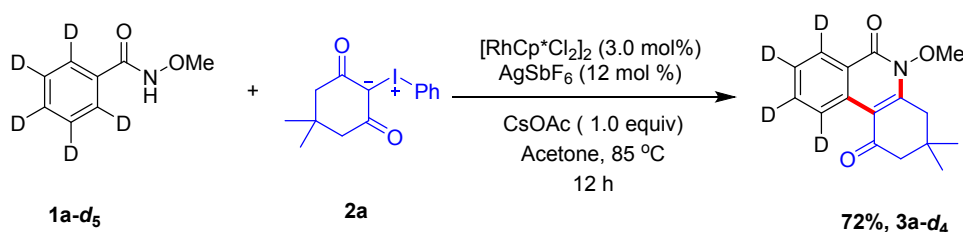

Scheme ESI-7

A pressure tube was charged with N-methoxybenzamide-2,3,4,5,6-d<sub>5</sub> (**1a-d<sub>5</sub>**) 93.0 mg (0.6 mmol), **2a** 203.7 mg (0.6 mmol), [RhCp\*Cl<sub>2</sub>]<sub>2</sub> 11.0 mg (3.0 mol %), AgSbF<sub>6</sub> 24.5 mg, (12.0 mol %), CsOAc (115.0 mg 1.0 equiv), and Acetone 5.0 mL. The reaction mixture was stirred at 85 °C for 12 h under nitrogen atmosphere. After cooling to room temperature, the reaction mixture was diluted with CH<sub>2</sub>Cl<sub>2</sub>, filtered through celite and the filtrate was concentrated under reduced pressure. The residue was purified by silica gel chromatography using Ethyl acetate/Hexane as eluent. The desired product was a colourless solid **3a-d<sub>4</sub>** isolated 117 mg in 72% yield. The structure of **3a-d<sub>4</sub>** was confirmed by using <sup>1</sup>H and <sup>13</sup>C NMR spectroscopy.

## 10. Parallel KIE experiments

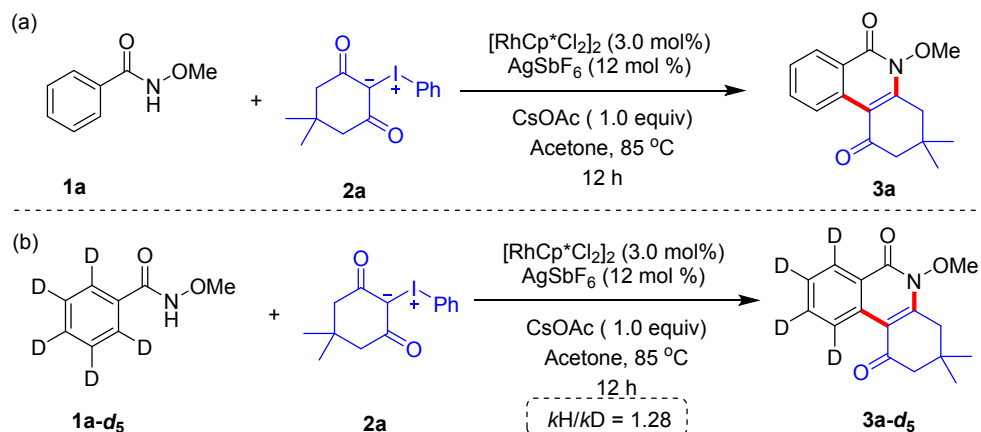

Scheme ESI-8



(a) A pressure tube was charged with N-methoxybenzamide (**1a**) 70.0 mg, **2a** 158.6 mg, [RhCp\*Cl<sub>2</sub>]<sub>2</sub> 8.5 mg (3.0 mol %), AgSbF<sub>6</sub> 20.0 mg, (12.0 mol %), CsOAc (89.0 mg 1.0 equiv), and Acetone 4.0 mL. (b) At the same time, another pressure tube was charged with N-methoxybenzamide-2,3,4,5,6-d<sub>5</sub> (**1a-d<sub>5</sub>**) 70.0 mg, **2a** 153 mg, [RhCp\*Cl<sub>2</sub>]<sub>2</sub> 8.5 mg (3.0 mol %), AgSbF<sub>6</sub> 20.0 mg, (12.0 mol %), CsOAc (89.0 mg 1.0 equiv), and Acetone 4.0 mL. Both the reaction mixture was stirred at 85 °C for 3 h under nitrogen atmosphere. After cooling to room temperature, the reaction mixtures were diluted with CH<sub>2</sub>Cl<sub>2</sub>, and the filtrate was concentrated under reduced pressure. Both the residues were purified separately by silica gel chromatography using Ethyl acetate/Hexane as eluent. Desired product **3a** (64%) and **3a-d<sub>4</sub>** (50%) was isolated (**3a/3a-d<sub>4</sub>** = 64:50, *k<sub>H</sub>/k<sub>D</sub>* = 1.28).

## 11. Control reactions

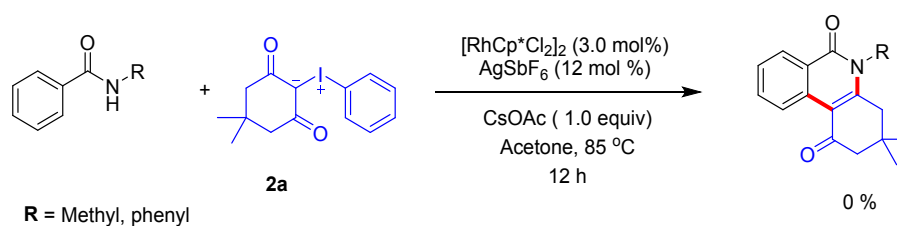

**Scheme ESI-9**

A pressure tube was charged with N-methylbenzamide or N-phenylbenzamide (98.5 mg, 0.5 mmol) and 5,5-dimethyl-2-(phenyl-iodanylidene)cyclohexane-1,3-dione (**2a**, 171.0 mg, 0.5 mmol), [RhCp\*Cl<sub>2</sub>]<sub>2</sub> (9.2 mg, 3 mol %), AgSbF<sub>6</sub> (20.4 mg, 20.0 mol %), CsOAc ( 95.3 mg, 1.0 equiv) and acetone 5.0 mL. The reaction mixture was stirred at 85 °C for 12 h under nitrogen atmosphere. After completion of 12 hours the reaction mixture was checked by TLC to monitor the desired product **3ai** and **3aj** formation. The starting material was decomposed and the desired product was not observed.

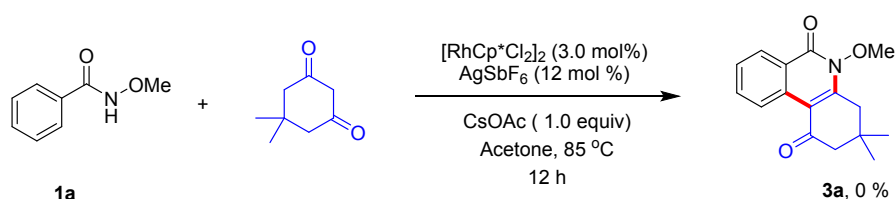

**Scheme ESI-10**

A pressure tube was charged with N-methoxybenzamide (**1a**, 75.6 mg, 0.5 mmol) and 5,5-dimethyl-cyclohexane-1,3-dione (70.0 mg, 0.5 mmol), [RhCp\*Cl<sub>2</sub>]<sub>2</sub> (9.2 mg, 3.0 mol %), AgSbF<sub>6</sub> (20.4 mg, 12.0 mol %), CsOAc (95.3 mg, 1.0 equiv) and Acetone 5.0 mL. The reaction mixture was stirred at 85 °C for 12 h under nitrogen atmosphere. After completion of 12 hours the reaction mixture was checked by TLC to monitor the desired product **3a** formation. The starting material was decomposed and the desired product was not formed.

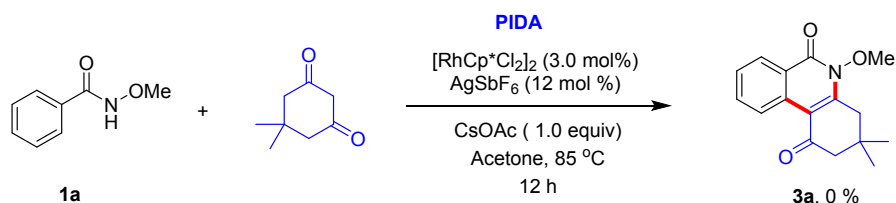

**Scheme ESI-11**

A pressure tube was charged with N-methoxybenzamide (**1a**, 75.6 mg, 0.5 mmol), 5,5-dimethyl cyclohexane 1,3-dione (70.0 mg, 0.5 mmol), Phenyl iodo diacetate (160.0 mg, 0.5 mmol), [RhCp\*Cl<sub>2</sub>]<sub>2</sub> (9.2 mg, 5 mol %), AgSbF<sub>6</sub> (20.4 mg, 20.0 mol %), CsOAc (95.3 mg, 1.0 equiv) and Acetone 5.0 mL. The reaction mixture was stirred at 85 °C for 12 h under nitrogen atmosphere. After completion of 12 hours the reaction mixture was checked by TLC to monitor the desired product **3a** formation. The starting material was decomposed and the desired product was not formed.

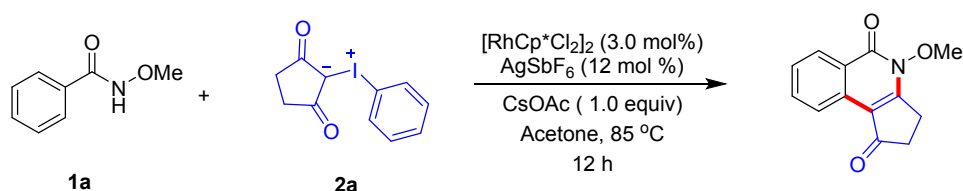

**Scheme ESI-12**

A pressure tube was charged with N-methoxybenzamide (**1a**, 75.6 mg, 0.5 mmol), 2-(phenyl-iodaneylidene)cyclopentane-1,3-dione (150.0 mg, 0.5 mmol), Phenyl iodo diacetate (160.0 mg, 0.5 mmol), [RhCp\*Cl<sub>2</sub>]<sub>2</sub> (9.2 mg, 5 mol %), AgSbF<sub>6</sub> (20.4 mg, 20.0 mol %), CsOAc (95.3 mg, 1.0 equiv.) and Acetone 5.0 mL. The reaction mixture was stirred at 85 °C for 12 h under nitrogen atmosphere. After completion of 12 hours the reaction mixture was checked by TLC to monitor the desired product **3ak** formation. The starting material was decomposed and the desired product was not formed.

## 12. Gram scale synthesis

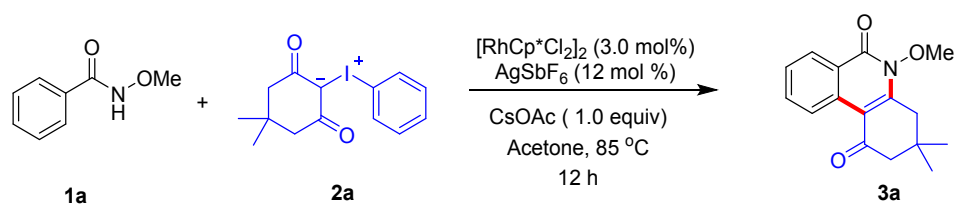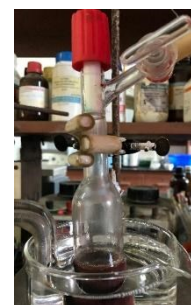

Scheme ESI-13

A pressure tube was charged with N-methoxybenzamide (**1a**, 1.05 g) and 5,5-dimethyl-2-(phenyl-13-iodanylidene)cyclohexane-1,3-dione (**2a**, 2.4 g),  $[\text{RhCp}^*\text{Cl}_2]_2$  (128 mg, 3 mol %),  $\text{AgSbF}_6$  (358 mg, 15.0 mol %),  $\text{CsOAc}$  (1.3 g, 1.0 equiv) and Acetone 60 mL. The reaction mixture was stirred at 85 °C for 12 h under nitrogen atmosphere. After cooling to room temperature, the reaction mixture was diluted with  $\text{CH}_2\text{Cl}_2$ , filtered through celite and the filtrate was concentrated under reduced pressure. The residue was purified by silica gel (100-200 mesh) chromatography using Ethyl acetate/Hexane as eluent. Desired product was a colourless solid **3a** obtained in 80% of yield.

## 13. Synthetic transformation

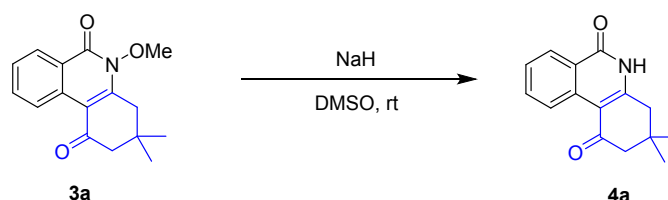

Scheme ESI-14

In a 50 mL round-bottom flask fitted with a magnetic stirrer, a suspension of 5-methoxy-3,3-dimethyl-3,4-dihydrophenanthridine-1,6(2H,5H)-dione **3a** (100 mg), Sodium hydride NaH (2.0 equiv) in Dimethyl Sulfoxide (DMSO) 5.0 mL was stirred at room temperature. The reaction was monitored on TLC. After completion of the reaction, the reaction mixture was poured in to ice, extracted with ethyl acetate. The organic layer was washed with water and brine, dried over anhydrous  $\text{Na}_2\text{SO}_4$ . The solution was concentrated under reduced pressure to provide crude 3,3-dimethyl-3,4-dihydrophenanthridine-1,6(2H,5H)-dione **4a**. The crude residue was purified through a silica gel column using hexanes and ethyl acetate as eluent to give pure **4a** in 95% yield.

#### 14. Experimental procedure for **1a** with 3-(phenyl-*l*-3-iodaneylidene)chromane-2,4-dione

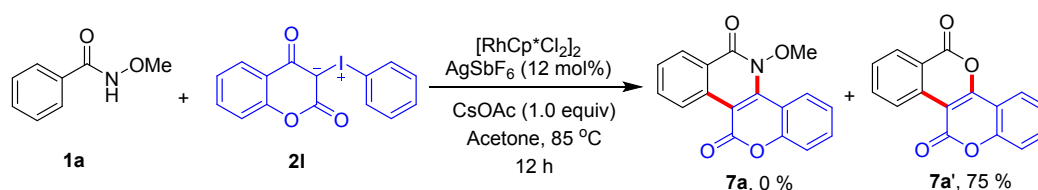

**Scheme ESI-15**

A pressure tube was charged with N-methoxybenzamide **1a** (0.6 mmol) and 3-(phenyl-*l*-3-iodaneylidene)chromane-2,4-dione **2I** (0.6 mmol), [RhCp\*Cl<sub>2</sub>]<sub>2</sub> (3.0 mol %), AgSbF<sub>6</sub> (12 mol %), CsOAc (1.0 equiv) and Acetone 5.0 ml. The reaction mixture was stirred at 85 °C for 12 h under nitrogen atmosphere. After cooling down to room temperature, the reaction mixture was diluted with CH<sub>2</sub>Cl<sub>2</sub>, filtered through celite and the filtrate was concentrated under reduced pressure. The residue was purified by silica gel chromatography using Ethyl acetate/Hexane as eluent. The product **7a** was not detected as a colourless solid, instead **7a'** was obtained in 75% of yield. The structure of **7a'** was confirmed by using <sup>1</sup>H, <sup>13</sup>C and HRMS spectroscopic analysis.

## 15. Proposed catalytic pathway for the reaction of **1a** with **2a** using Rh(III)-catalyst

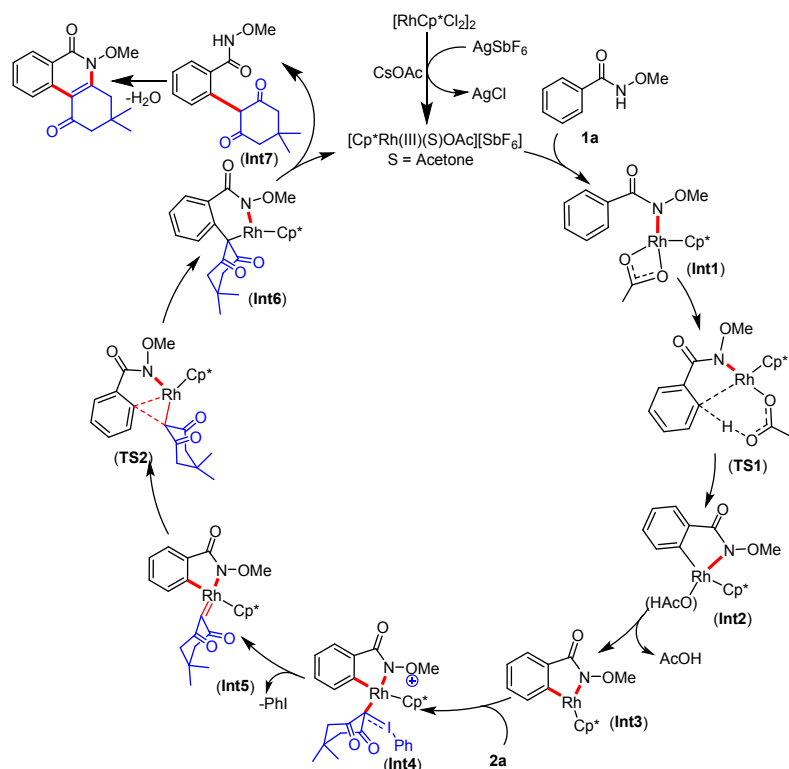

Scheme ESI-16. Proposed catalytic pathway for the reaction of **1a** with **2a** using a Rh(III)-catalyst.

## 16. Optimization of reaction condition for **4a** with diphenylacetylene

In our initial attempt, 3,3-dimethyl-3,4-dihydrophenanthridine-1,6(2H,5H)-dione **4a** and diphenyl acetylene **5a** (1.0 equiv) was reacted with  $[\text{RhCp}^*\text{Cl}_2]_2$  (5.0 mol %),  $\text{AgSbF}_6$  (20 mol %),  $\text{Cu}(\text{OAc})_2 \cdot \text{H}_2\text{O}$  (1.0equiv), in 1,2-Dichloroethane (5.0 mL) at 110 °C under nitrogen for 16 h. After completion of the reaction, evidenced by thin-layer chromatography (TLC), the product **6** was isolated by column chromatography, with the yield of 40 % (Table 1, entry 1). The structure of the product was confirmed as a highly substituted 9,9-dimethyl-4,5-diphenyl-9,10-dihydropyrano[2,3,4-gh]phenanthridin-11(8H)-one **6** using various analytical techniques, such as high-resolution mass spectrometry (HRMS),  $^1\text{H}$  and  $^{13}\text{C}$  NMR, and single crystal X-ray diffraction. Switching the solvent from *t*-AmOH to Toluene and 1,2-DCE under an identical reaction condition provided the annulated product **6** in yield of 25% and 86%, respectively. While other oxidants, such as NaOAc, KOAc,  $\text{K}_2\text{CO}_3$  and  $\text{Na}_2\text{CO}_3$  doesn't make a significant improvement in the reaction yield (ESI Table 2, entries 4–7).

**ESI Table 2.** Reaction optimization of 3,3-dimethyl-3,4-dihydrophenanthridine-1,6(2H,5H)-dione **4a** with diphenylacetylene **5a** <sup>a</sup>

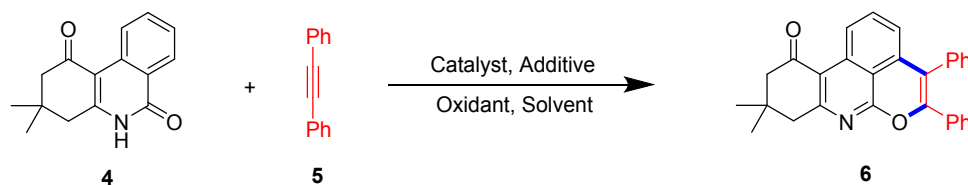

| S.no | Catalyst                             | Oxidant                                | Additive           | time           | Yield (%) <sup>a</sup> |
|------|--------------------------------------|----------------------------------------|--------------------|----------------|------------------------|
| 1    | [RhCp*Cl <sub>2</sub> ] <sub>2</sub> | Cu(OAc) <sub>2</sub> .H <sub>2</sub> O | AgSbF <sub>6</sub> | <i>t</i> -AmOH | 40                     |
| 2    | [RhCp*Cl <sub>2</sub> ] <sub>2</sub> | Cu(OAc) <sub>2</sub> .H <sub>2</sub> O | AgSbF <sub>6</sub> | Toluene        | 25                     |
| 3    | [RhCp*Cl <sub>2</sub> ] <sub>2</sub> | Cu(OAc) <sub>2</sub> .H <sub>2</sub> O | AgSbF <sub>6</sub> | 1,2-DCE        | 86                     |
| 4    | [RhCp*Cl <sub>2</sub> ] <sub>2</sub> | NaOAc                                  | AgSbF <sub>6</sub> | 1,2-DCE        | 50                     |
| 5    | [RhCp*Cl <sub>2</sub> ] <sub>2</sub> | KOAc                                   | AgSbF <sub>6</sub> | 1,2-DCE        | 35                     |
| 6    | [RhCp*Cl <sub>2</sub> ] <sub>2</sub> | K <sub>2</sub> CO <sub>3</sub>         | AgSbF <sub>6</sub> | 1,2-DCE        | trace                  |
| 7    | [RhCp*Cl <sub>2</sub> ] <sub>2</sub> | Na <sub>2</sub> CO <sub>3</sub>        | AgSbF <sub>6</sub> | 1,2-DCE        | trace                  |

**Reaction condition:** **4a** 3,3-dimethyl-3,4-dihydrophenanthridine-1,6(2H,5H)-dione (0.3 mmol), **5a** diphenylacetylene (0.3 mmol, 1.0 equiv), [RhCp\*Cl<sub>2</sub>]<sub>2</sub> (5.0 mol%), Cu(OAc)<sub>2</sub>.H<sub>2</sub>O (1.0 equiv.) and AgSbF<sub>6</sub> (20.0 mol%) in DCE (5.0 mL) at 110 °C for 12 h. <sup>a</sup> Isolated yields.

## 17. General procedure for synthesis of Dihydropyrano phenanthridin-11(8H)-one (**6a-g**)

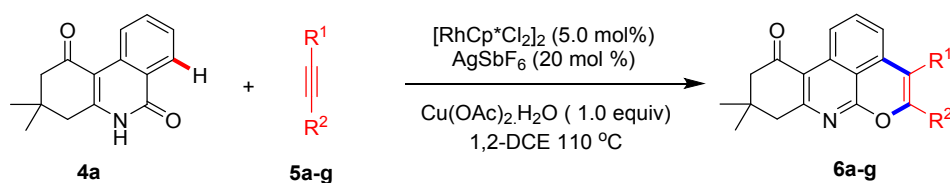

**Scheme ESI-15**

A pressure tube was charged with 3,3-dimethyl-3,4-dihydrophenanthridine-1,6(2H,5H)-dione (**4a**, 72.3 mg, 0.3 mmol), diphenylacetylene (**5a**, 54 mg, 0.3 mmol), [RhCp\*Cl<sub>2</sub>]<sub>2</sub> (4.6 mg, 2.5 mol %), AgSbF<sub>6</sub> (10.2 mg, 10.0 mol %), Cu(OAc)<sub>2</sub>.H<sub>2</sub>O (59.6 mg, 1.0 equiv), and 1,2-DCE 5.0 mL. The reaction mixture was heated at 110 °C for 12 h under nitrogen atmosphere. After cooling to ambient temperature, the reaction mixture was diluted with CH<sub>2</sub>Cl<sub>2</sub>, filtered through celite and the filtrate was concentrated under reduced pressure. The residue was

purified by silica gel chromatography using Ethyl acetate/Hexane (25:75) as eluent. The desired annulated product yellow solid **6a-g** was obtained in 65-85 % of yield.

## 18. Mechanism for formation of compound **6a**

Based on our experimental results and the reported metal Rh catalysed C–H activation and annulation process, a possible mechanism is being proposed. The catalytic reaction begins with the removal of Cl<sup>-</sup> from [RhCp\*Cl<sub>2</sub>]<sub>2</sub> via AgSbF<sub>6</sub> to generate the active [Rh] catalyst. Then, the active rhodium catalyst gets attached with the directing group O–H and forms the intermediate **A**. Then, peri C–H metalation of the intermediate **A** provides a five-membered rhodacycle intermediate **B**. Insertion of **5a** alkyne into  $\pi$ -interaction formation of intermediate **C** the Rh–CPh bond proceeds well with regioselectivity and gives the seven-membered species **D**. The desired product **6a** was then generated through a reductive elimination of the intermediate **D**. Finally Rh(III) is regenerated under the oxidation of Cu(OAc)<sub>2</sub>·H<sub>2</sub>O under air.

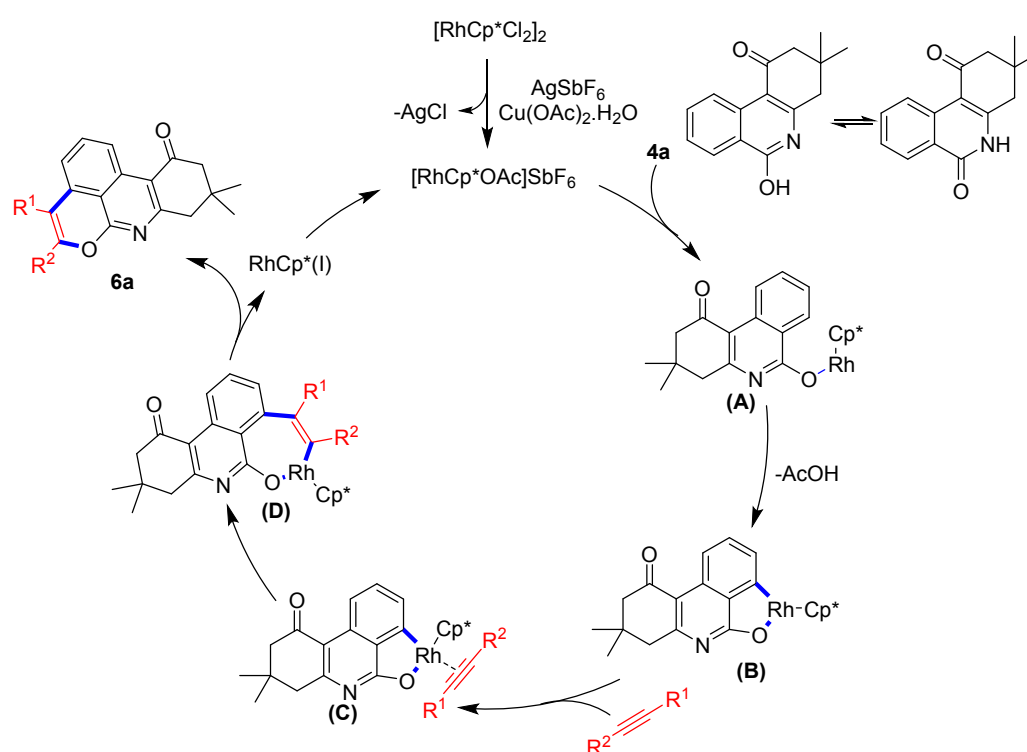

**Scheme ESI-18.** Possible mechanism for formation of compound **6a**

## 19. Regioselectivity of reaction 6f

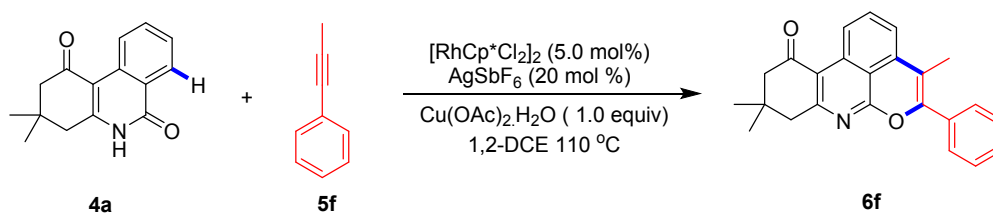

Scheme ESI-19

A pressure tube was charged with 3,3-dimethyl-3,4-dihydrophenanthridine-1,6(2H,5H)-dione (**4a**, 72.3 mg, 0.3 mmol), prop-1-yn-1-ylbenzene (**5f**, 36 mg, 0.3 mmol),  $[\text{RhCp}^*\text{Cl}_2]_2$  (4.6 mg, 2.5 mol %),  $\text{AgSbF}_6$  (10.2 mg, 10.0 mol %),  $\text{Cu}(\text{OAc})_2 \cdot \text{H}_2\text{O}$  (59.6 mg, 1.0 equiv), and 1,2-DCE 5.0 mL. The reaction mixture was heated at 110 °C for 12 h under nitrogen atmosphere. After cooling to ambient temperature, the reaction mixture was diluted with  $\text{CH}_2\text{Cl}_2$ , filtered through celite and the filtrate was concentrated under reduced pressure. The residue was purified by silica gel chromatography using Ethyl acetate/Hexane (25:75) as eluent. The desired annulated product yellow solid **6f** was obtained in 70 % of yield. The regioselectivity of the annulated product was confirmed by 1D NOE experiment.

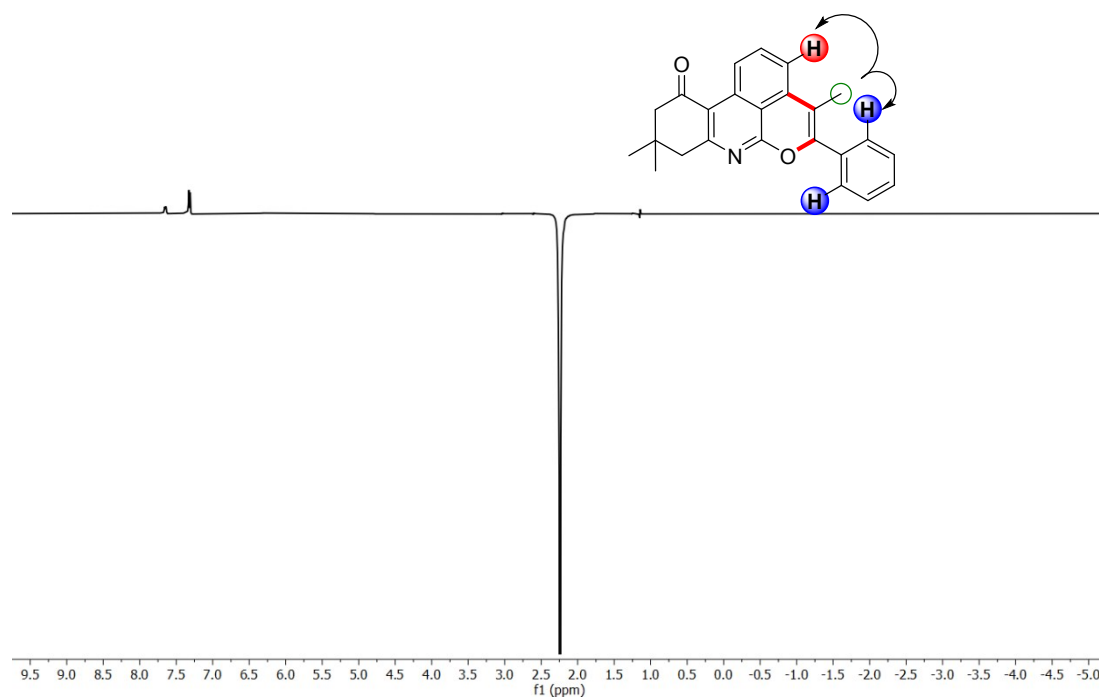



## 20. X-ray crystallographic data of compound 3s

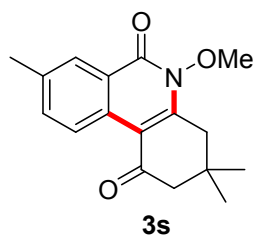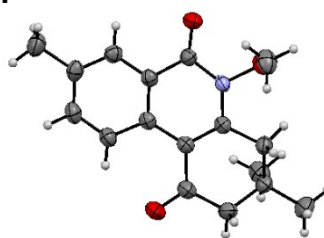

CCDC: 2040611

**ESI Table 3.** Crystal data and structure refinement for **3s**

| Parameters                        | Compound 3s                                                                                            |
|-----------------------------------|--------------------------------------------------------------------------------------------------------|
| Empirical formula                 | C <sub>17</sub> H <sub>19</sub> NO <sub>3</sub>                                                        |
| Formula weight                    | 285.34                                                                                                 |
| Temperature                       | 296 (2) K                                                                                              |
| Wavelength                        | 0.71073 Å                                                                                              |
| Crystal system                    | Monoclinic                                                                                             |
| space group                       | P2(1)/n                                                                                                |
| Unit cell dimensions              | a = 10.7764 (4) Å<br>b = 8.4814 (3) Å<br>c = 15.9946 (7) Å<br>α = 90 °<br>β = 97.431 (2) °<br>γ = 90 ° |
| Volume                            | 1449.61 (10) Å <sup>3</sup>                                                                            |
| Z, Calculated density             | 4, 1.307 Mg/m <sup>3</sup>                                                                             |
| Absorption coefficient            | 0.090 mm <sup>-1</sup>                                                                                 |
| F (000)                           | 608                                                                                                    |
| Crystal size                      | 0.250 x 0.220 x 0.180 mm                                                                               |
| θ range of data calculation       | 2.156 to 24.995 °<br>-12 ≤ h ≤ 12                                                                      |
| Index ranges (limiting indices)   | -10 ≤ k ≤ 8<br>-18 ≤ l ≤ 19<br>9943/2559                                                               |
| Reflections collected / unique    | [R(int) = 0.0260]                                                                                      |
| Completeness to theta = 24.995    | 100.0 %                                                                                                |
| Absorption correction             | none                                                                                                   |
| Refinement method                 | Full-matrix<br>least-squares on F <sup>2</sup>                                                         |
| Data / restraints / parameters    | 2559 / 0 / 194                                                                                         |
| Goodness-of-fit on F <sup>2</sup> | 1.009                                                                                                  |
| Final R indices                   | R1 = 0.0467                                                                                            |
| [I > 2σ(I)]                       | wR2 = 0.1194                                                                                           |
| R indices (all data)              | R1 = 0.0630,<br>wR2 = 0.1343                                                                           |
| Extinction coefficient            | n/a                                                                                                    |
| Largest diff. peak and hole       | 0.320 and -0.345 e.Å <sup>-3</sup>                                                                     |

## 21. X-ray crystallographic data of compound 6c

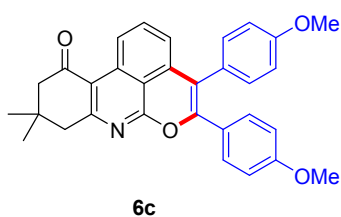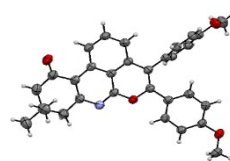

Compound **6c** CCDC number:  
1910024

**ESI Table 4.** Crystal data and structure refinement for **6c**

| Parameters                        | Compound <b>6c</b>                                                                                                  |
|-----------------------------------|---------------------------------------------------------------------------------------------------------------------|
| Empirical formula                 | C <sub>31</sub> H <sub>27</sub> N O <sub>4</sub>                                                                    |
| Formula weight                    | 477.53                                                                                                              |
| Wavelength                        | 0.71073 Å                                                                                                           |
| Crystal system                    | Triclinic                                                                                                           |
| space group                       | P -1                                                                                                                |
| Unit cell dimensions              | a = 9.9039(3) Å<br>b = 11.0962(3) Å<br>c = 11.7769(4) Å<br>α = 87.0152(1) °<br>β = 68.9253(1) °<br>γ = 88.6480(1) ° |
| Volume                            | 1206.01(6) Å <sup>3</sup>                                                                                           |
| Z, Calculated density             | 2, 1.315 Mg/m <sup>3</sup>                                                                                          |
| Absorption coefficient            | 0.087 mm <sup>-1</sup>                                                                                              |
| F (000)                           | 504                                                                                                                 |
| Crystal size                      | 0.250 x 0.220 x 0.100 mm                                                                                            |
| θ range                           | 1.838 to 25.000 °<br>-10 ≤ h ≤ 11                                                                                   |
| Index ranges                      | -13 ≤ k ≤ 13<br>-13 ≤ l ≤ 13<br>18030 / 4240                                                                        |
| Reflections collected / unique    | [R(int) = 0.0232]                                                                                                   |
| Completeness to theta             | 99.8 %                                                                                                              |
| Refinement method                 | Full-matrix<br>least-squares on F <sup>2</sup>                                                                      |
| Data / restraints / parameters    | 4240 / 0 / 330                                                                                                      |
| Goodness-of-fit on F <sup>2</sup> | 1.033                                                                                                               |
| Final R indices                   | R1 = 0.0390                                                                                                         |
| [I > 2σ(I)]                       | wR2 = 0.1000                                                                                                        |
| R indices (all data)              | R1 = 0.0540,<br>wR2 = 0.1139                                                                                        |
| Largest diff. peak and hole       | 0.185 and -0.149 e.Å <sup>-3</sup>                                                                                  |

## 22. DFT Calculations

### Computational details

The theoretical calculations were carried out by using Gaussian 09 program (revision A.02).<sup>3</sup> Geometry optimizations were performed using the M06 functional with a standard 6-31G(d) basis set (LANL2DZ basis set for Rh). Frequency analysis were done to obtain the thermodynamic energy corrections and to ensure that the optimized structures were at either a minimum (all positive frequency) or transition state (one negative frequency). IRC calculations were used to confirm the minima linked by each transition state. Single point energies were calculated at the M06 functional<sup>4</sup> with a standard 6-311++G(d,p) basis set (SDD<sup>5</sup> basis set for Rh) level using SMD<sup>6</sup> solvation model (solvent = acetone). The energy profile diagram of the reaction pathway is presented as Gibbs free energy changes ( $\Delta G$ 's) involving zero-point vibrational energy (ZPVE) and thermal corrections obtained at 298.15 K and 1 atmospheric pressure. Throughout the paper, the energies presented are the M06 calculated Gibbs free energies in acetone solvent with M06/6-31G\*-calculated thermodynamic corrections.

## Geometry of Optimized compounds.

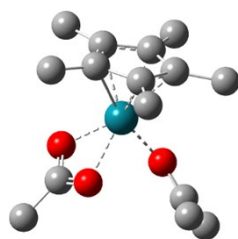

Act\_cat

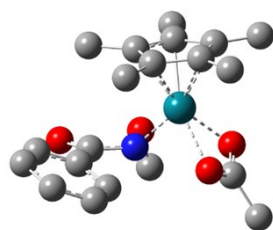

Int\_1

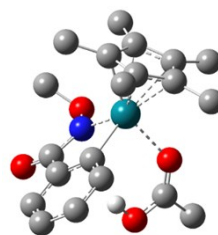

Int\_2

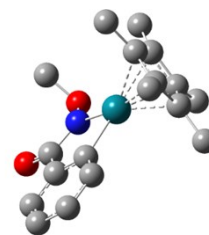

Int\_3

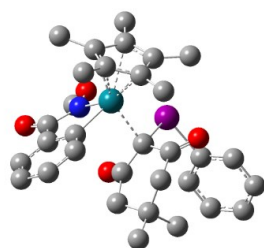

Int\_4

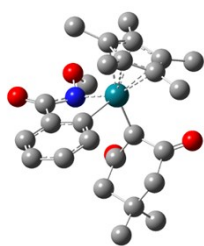

Int\_5

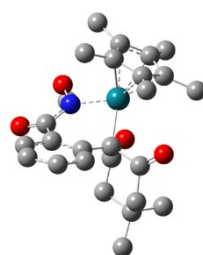

Int\_6

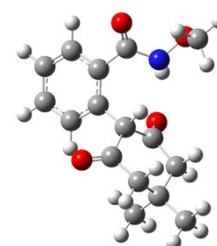

Int\_7

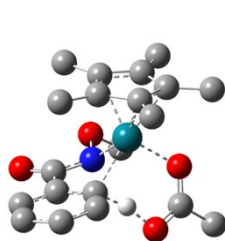

TS\_1

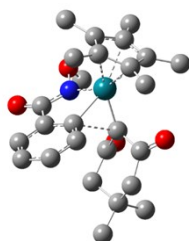

TS\_2

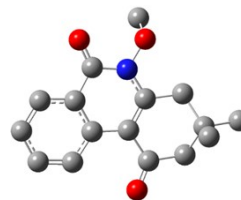

Product\_3aa

## Cartesian coordinates of the computed structures:

**Active catalyst** (Hartree/Particle)  
 Zero-point correction = 0.361304  
 Thermal correction to Energy = 0.385674  
 Thermal correction to Gibbs Free Energy = 0.308988  
 Lowest Frequency = 30.0441 cm<sup>-1</sup>  
 SCF (M06-SMD) Energy = -921.8894074

|    |             |             |             |
|----|-------------|-------------|-------------|
| Rh | -0.10135800 | 0.11154800  | 0.11372200  |
| O  | 1.16120100  | 1.56018000  | -0.95074400 |
| O  | 0.60635400  | 1.88446400  | 1.13325500  |
| C  | 1.23882800  | 2.27185300  | 0.10320200  |
| C  | 2.76420200  | -1.12288500 | 0.13029900  |
| C  | 2.07457800  | 3.50500300  | 0.13923900  |

|   |             |             |             |
|---|-------------|-------------|-------------|
| H | 1.66125200  | 4.22543800  | 0.85110100  |
| H | 3.08613200  | 3.24654300  | 0.47705600  |
| H | 2.15138200  | 3.94870800  | -0.85758400 |
| O | 1.77091700  | -0.81534700 | 0.79605000  |
| C | -2.07292000 | 0.54706500  | -0.54736100 |
| C | -1.56004200 | -0.54526400 | -1.35289900 |
| C | -1.26513800 | -1.63882500 | -0.48126300 |
| C | -2.14272100 | 0.08996900  | 0.81926300  |
| C | -1.60371200 | -1.24092500 | 0.86987600  |
| C | -1.32441600 | -0.46338800 | -2.81661000 |
| H | -0.69301100 | 0.40076000  | -3.06492000 |
| H | -0.83998600 | -1.36283100 | -3.20935100 |
| H | -2.27801300 | -0.33643400 | -3.34766500 |
| C | -2.48992200 | 1.87602200  | -1.06425400 |
| H | -1.90824000 | 2.15525000  | -1.95044100 |
| H | -3.55223000 | 1.87005700  | -1.34638300 |
| H | -2.34728500 | 2.66030500  | -0.31201400 |
| C | -2.58777700 | 0.89279000  | 1.98390200  |
| H | -2.00273100 | 0.66101000  | 2.88092600  |
| H | -2.49523200 | 1.96732100  | 1.79570800  |
| H | -3.64287900 | 0.67818100  | 2.20604700  |
| C | -1.45035700 | -2.09774600 | 2.07336200  |
| H | -1.42361400 | -1.50754200 | 2.99505500  |
| H | -2.29039200 | -2.80290700 | 2.15149200  |
| H | -0.52696500 | -2.68784600 | 2.02862100  |
| C | -0.71287600 | -2.96858000 | -0.84927300 |
| H | -1.48551800 | -3.74255000 | -0.73973700 |
| H | -0.35847000 | -2.99943400 | -1.88488800 |
| H | 0.12048600  | -3.24939300 | -0.19259400 |
| C | 2.78331200  | -1.01496900 | -1.35789500 |
| H | 2.80580600  | 0.05146800  | -1.62480600 |
| H | 3.63964900  | -1.52479900 | -1.80910300 |
| H | 1.84602600  | -1.40909400 | -1.77302000 |
| C | 3.99037100  | -1.60578500 | 0.82454700  |
| H | 4.21281600  | -2.63442300 | 0.50785700  |
| H | 4.85427000  | -1.00009900 | 0.51781200  |
| H | 3.87162700  | -1.56772200 | 1.91007200  |

### Int\_1

Zero-point correction= 0.423844  
 Thermal correction to Energy= 0.452849  
 Thermal correction to Gibbs Free Energy= 0.365646  
 Lowest Frequency = 26.0201 cm<sup>-1</sup>  
 SCF (M06-SMD) Energy = HF=-1243.5694377

|    |             |             |             |
|----|-------------|-------------|-------------|
| Rh | -0.80502900 | -0.04335900 | 0.12392300  |
| N  | 0.43130200  | 1.47479500  | -0.64316800 |
| C  | -0.15116200 | -2.09086400 | -0.09694000 |
| C  | -1.43965600 | -2.09733900 | 0.58525200  |
| C  | -2.39178500 | -1.50070100 | -0.27388200 |
| C  | -1.70399600 | -1.10136600 | -1.49655500 |

|   |             |             |             |
|---|-------------|-------------|-------------|
| C | -0.34218600 | -1.54568600 | -1.40849000 |
| O | -2.04437600 | 1.62519000  | 0.86484400  |
| O | -0.50075900 | 0.78443700  | 2.17436000  |
| C | -1.38276900 | 1.66463600  | 1.94352600  |
| C | -1.61286300 | 2.77682300  | 2.92006500  |
| H | -1.30206600 | 2.48105800  | 3.92642700  |
| H | -1.01071700 | 3.64253200  | 2.61475100  |
| H | -2.66388500 | 3.08219100  | 2.91629200  |
| O | -0.36577600 | 2.04860800  | -1.65482200 |
| C | 1.68898900  | 1.21210100  | -1.13810700 |
| C | 2.62156600  | 0.52654100  | -0.18207400 |
| C | 2.47534700  | 0.55812900  | 1.20692600  |
| C | 3.71034300  | -0.15055100 | -0.73943400 |
| C | 3.39591200  | -0.09788200 | 2.01966300  |
| H | 1.63886500  | 1.09231000  | 1.65183700  |
| C | 4.62070100  | -0.81588000 | 0.07279700  |
| H | 3.82925000  | -0.12438000 | -1.82187400 |
| C | 4.46351800  | -0.79223800 | 1.45713900  |
| H | 3.27931700  | -0.05922000 | 3.10202200  |
| H | 5.46293400  | -1.34333500 | -0.37333500 |
| H | 5.18112500  | -1.30427300 | 2.09707600  |
| O | 2.07524800  | 1.52074600  | -2.26232100 |
| C | 0.66146900  | -1.42543200 | -2.49867300 |
| H | 0.74044800  | -0.39887900 | -2.88271600 |
| H | 1.66127800  | -1.72344500 | -2.16391500 |
| H | 0.37505000  | -2.07773300 | -3.33611600 |
| C | -2.31514700 | -0.43077200 | -2.67349800 |
| H | -1.64078000 | 0.34187900  | -3.06161600 |
| H | -2.52053500 | -1.15407000 | -3.47663700 |
| H | -3.25897000 | 0.05897600  | -2.40795700 |
| C | -3.82378600 | -1.22361700 | 0.01228000  |
| H | -4.07905600 | -0.18570500 | -0.23605200 |
| H | -4.47364600 | -1.88096200 | -0.58285200 |
| H | -4.06244400 | -1.37680700 | 1.07039900  |
| C | -1.64415500 | -2.59184300 | 1.97276000  |
| H | -2.62838600 | -2.30952600 | 2.36172800  |
| H | -1.56244900 | -3.68742500 | 2.01672800  |
| H | -0.88918500 | -2.17245500 | 2.65040100  |
| C | 1.09539600  | -2.66056500 | 0.47703600  |
| H | 1.25556100  | -2.29739400 | 1.50085000  |
| H | 1.03581300  | -3.75853400 | 0.51461400  |
| H | 1.97978400  | -2.38182100 | -0.10595600 |
| C | -0.43523400 | 3.44092500  | -1.45420300 |
| H | 0.55416700  | 3.90586600  | -1.58011000 |
| H | -1.11668700 | 3.82499700  | -2.22174000 |
| H | -0.83529500 | 3.67539100  | -0.45665900 |

### TS\_1

|                                          |          |
|------------------------------------------|----------|
| Zero-point correction=                   | 0.419571 |
| Thermal correction to Energy=            | 0.446727 |
| Thermal correction to Gibbs Free Energy= | 0.365255 |

Lowest Frequency = -1557.1725  
SCF (M06-SMD) Energy = -1243.5406004

|    |             |             |             |
|----|-------------|-------------|-------------|
| Rh | 0.40578800  | -0.18907200 | -0.13459000 |
| N  | -0.07263600 | 1.42110700  | 1.11060100  |
| C  | -0.26429900 | -2.16954400 | 0.48777600  |
| C  | 0.45485800  | -2.33411800 | -0.76466300 |
| C  | 1.78274400  | -1.87927900 | -0.55687000 |
| C  | 1.91160800  | -1.44124900 | 0.82098000  |
| C  | 0.65840600  | -1.67707300 | 1.47290400  |
| O  | 1.67935000  | 1.21458600  | -1.19472500 |
| O  | -0.10883900 | 2.26772100  | -2.03455700 |
| C  | 1.13236400  | 2.14327500  | -1.85440900 |
| C  | 2.03547900  | 3.19750500  | -2.43577600 |
| H  | 1.56722500  | 3.67716100  | -3.29966500 |
| H  | 2.20302700  | 3.96478600  | -1.66821700 |
| H  | 3.00714200  | 2.77328000  | -2.70517300 |
| O  | 0.78510300  | 1.65646100  | 2.17592200  |
| C  | -1.39388400 | 1.38934300  | 1.50152900  |
| C  | -2.23317900 | 0.86869800  | 0.37299400  |
| C  | -1.60615300 | 0.47318400  | -0.82467100 |
| C  | -3.59830900 | 0.69070700  | 0.56647600  |
| C  | -2.39705300 | -0.11405000 | -1.82257700 |
| H  | -0.72917800 | 1.29691700  | -1.37147300 |
| C  | -4.36315300 | 0.11087000  | -0.44120300 |
| H  | -4.03151500 | 0.99649200  | 1.51818100  |
| C  | -3.76526100 | -0.29074100 | -1.63738400 |
| H  | -1.93469000 | -0.39860400 | -2.77046000 |
| H  | -5.43370300 | -0.03068700 | -0.29745400 |
| H  | -4.37341600 | -0.73030900 | -2.42744900 |
| O  | -1.85421000 | 1.71906800  | 2.58384700  |
| C  | 0.37076300  | -1.39151100 | 2.90349500  |
| H  | 0.76421400  | -0.40767200 | 3.19041100  |
| H  | -0.70470800 | -1.38584800 | 3.11226600  |
| H  | 0.83767600  | -2.15199500 | 3.54589900  |
| C  | 3.13843500  | -0.89309100 | 1.46080700  |
| H  | 2.87397400  | -0.15369100 | 2.22924400  |
| H  | 3.73352100  | -1.68340100 | 1.94251300  |
| H  | 3.77777200  | -0.39291000 | 0.72255400  |
| C  | 2.87171400  | -1.78476200 | -1.56570000 |
| H  | 3.20394700  | -0.74280600 | -1.67175600 |
| H  | 3.73881900  | -2.38731000 | -1.26084200 |
| H  | 2.54627700  | -2.13638300 | -2.55069200 |
| C  | -0.10345300 | -2.91291200 | -2.01885100 |
| H  | 0.33830000  | -2.45050400 | -2.91007700 |
| H  | 0.08474000  | -3.99528100 | -2.07436700 |
| H  | -1.18765600 | -2.76403100 | -2.07788600 |
| C  | -1.67056300 | -2.58346900 | 0.74608100  |
| H  | -2.29893200 | -2.46603000 | -0.14466200 |
| H  | -1.71328200 | -3.63804800 | 1.05513200  |
| H  | -2.12531200 | -1.97961500 | 1.54032300  |

|   |            |            |            |
|---|------------|------------|------------|
| C | 1.73155900 | 2.63529300 | 1.79874100 |
| H | 1.22957200 | 3.57797800 | 1.53743200 |
| H | 2.37287600 | 2.78768200 | 2.67396900 |
| H | 2.33433900 | 2.29621500 | 0.94261700 |

## Int\_2

Zero-point correction= 0.423764  
 Thermal correction to Energy= 0.452289  
 Thermal correction to Gibbs Free Energy= 0.366531  
 Lowest Frequency = -9.9967 cm<sup>-1</sup>  
 SCF (M06-SMD) Energy = -1243.5588055

|    |             |             |             |
|----|-------------|-------------|-------------|
| Rh | 0.47323800  | 0.11146500  | 0.05648200  |
| C  | 1.81368100  | 0.40265700  | -1.55681200 |
| C  | 1.72049500  | 1.67830400  | -0.87215200 |
| C  | 2.18687200  | 1.48098100  | 0.44892000  |
| C  | 2.72758700  | 0.12424300  | 0.54120200  |
| C  | 2.55103600  | -0.51535200 | -0.68996700 |
| C  | 1.48203400  | 0.18480700  | -2.99225600 |
| C  | 1.24788500  | 2.94418100  | -1.49667300 |
| C  | 2.23380900  | 2.47181500  | 1.55926500  |
| C  | 3.31898700  | -0.45796700 | 1.77624800  |
| C  | 2.93696100  | -1.91916200 | -1.01263100 |
| H  | 2.30247400  | 0.52092500  | -3.64483100 |
| H  | 0.57805300  | 0.73938300  | -3.27368800 |
| H  | 1.29284500  | -0.87364100 | -3.20505300 |
| H  | 0.30592400  | 2.80661100  | -2.04162300 |
| H  | 1.99718400  | 3.31562900  | -2.21126300 |
| H  | 1.08777600  | 3.73260400  | -0.75181500 |
| H  | 1.55336900  | 3.31265100  | 1.37992300  |
| H  | 3.24630900  | 2.88150700  | 1.69446700  |
| H  | 1.93543400  | 2.00584400  | 2.50726200  |
| H  | 2.61453200  | -0.39423200 | 2.61649100  |
| H  | 4.23359400  | 0.07764600  | 2.07060500  |
| H  | 3.57133000  | -1.51520900 | 1.63759800  |
| H  | 3.96266900  | -2.13031800 | -0.68332000 |
| H  | 2.89242000  | -2.10758300 | -2.09199400 |
| H  | 2.26238200  | -2.63518500 | -0.52054300 |
| C  | -1.93695400 | -1.45088600 | -0.85725400 |
| O  | -2.69372900 | -2.35782400 | -1.19559900 |
| N  | -0.65798900 | -1.55667000 | -0.40886000 |
| O  | -0.11257200 | -2.82835800 | -0.31918700 |
| C  | -0.03474400 | -3.47123200 | -1.58143700 |
| H  | -1.03338000 | -3.74053500 | -1.94171200 |
| H  | 0.45803700  | -2.81808400 | -2.31982100 |
| H  | 0.57509300  | -4.36830700 | -1.42230300 |
| O  | -0.07334900 | -0.24344600 | 2.28003200  |
| C  | -1.14359100 | -0.45878800 | 2.83693500  |
| O  | -2.32351100 | -0.22424600 | 2.30216400  |
| C  | -1.23839200 | -1.03396000 | 4.21272500  |
| H  | -2.01750500 | -0.52621300 | 4.78987500  |



|   |             |             |             |
|---|-------------|-------------|-------------|
| H | -1.52452900 | -2.08978500 | 4.13041500  |
| H | -0.27252900 | -0.96532600 | 4.71778600  |
| C | -2.31925400 | -0.00590600 | -0.83970900 |
| C | -3.61453500 | 0.38563300  | -1.16750700 |
| C | -1.36110000 | 0.91780000  | -0.39776100 |
| C | -3.97763000 | 1.72251700  | -1.04771400 |
| H | -4.31383500 | -0.38216200 | -1.49901900 |
| C | -1.74705000 | 2.25333400  | -0.25919500 |
| C | -3.04637700 | 2.65057600  | -0.58494100 |
| H | -4.98845800 | 2.04142300  | -1.29738900 |
| H | -1.04156400 | 2.99872900  | 0.11396500  |
| H | -3.33379400 | 3.69578900  | -0.46923900 |
| H | -2.20665200 | 0.10802900  | 1.38056900  |

### Int\_3

Zero-point correction= 0.360782  
 Thermal correction to Energy= 0.383996  
 Thermal correction to Gibbs Free Energy= 0.310160  
 Lowest Frequency = 35.8020 cm<sup>-1</sup>  
 SCF (M06) Energy = -1014.5125922

|    |             |             |             |
|----|-------------|-------------|-------------|
| Rh | -0.30054300 | -0.03970000 | 0.02217300  |
| C  | -2.04560700 | -0.55462700 | -1.17556200 |
| C  | -1.60563900 | -1.76180500 | -0.51334600 |
| C  | -1.67121900 | -1.51698500 | 0.87973100  |
| C  | -2.24075500 | -0.17909500 | 1.07295500  |
| C  | -2.52613600 | 0.38306300  | -0.18845100 |
| C  | -2.08253300 | -0.36982700 | -2.64935100 |
| C  | -1.17047200 | -3.00489500 | -1.20952000 |
| C  | -1.31154100 | -2.44716700 | 1.98373500  |
| C  | -2.45845300 | 0.48159400  | 2.38632800  |
| C  | -3.08064300 | 1.74730900  | -0.42549900 |
| H  | -3.03241000 | -0.74238300 | -3.06265300 |
| H  | -1.26881300 | -0.91950300 | -3.13687900 |
| H  | -1.98597700 | 0.68588400  | -2.92835400 |
| H  | -0.41259000 | -2.79554300 | -1.97592200 |
| H  | -2.01942600 | -3.49817100 | -1.70497300 |
| H  | -0.73670800 | -3.72786200 | -0.50880700 |
| H  | -0.66832500 | -3.26196200 | 1.63350400  |
| H  | -2.21109100 | -2.89530400 | 2.43169400  |
| H  | -0.76816300 | -1.92621600 | 2.78176400  |
| H  | -1.74060700 | 0.12805500  | 3.13574600  |
| H  | -3.46921900 | 0.27507800  | 2.76947400  |
| H  | -2.34386700 | 1.56922400  | 2.30105500  |
| H  | -4.09189100 | 1.84664900  | -0.00685300 |
| H  | -3.14554300 | 1.97609100  | -1.49574400 |
| H  | -2.44384200 | 2.51333300  | 0.04064200  |
| C  | 2.08353400  | 1.67464100  | 0.21228100  |
| O  | 2.75793100  | 2.68090400  | 0.33212200  |
| N  | 0.69097000  | 1.63895100  | 0.17679500  |
| O  | 0.05808400  | 2.85283100  | 0.39372300  |

|   |             |             |             |
|---|-------------|-------------|-------------|
| C | 0.05682000  | 3.62632200  | -0.79243900 |
| H | 1.07916800  | 3.89408800  | -1.08649300 |
| H | -0.43917600 | 3.07609500  | -1.61019300 |
| H | -0.51257100 | 4.53285200  | -0.55962100 |
| C | 2.60134800  | 0.28654800  | 0.06616700  |
| C | 3.96513300  | 0.03332800  | 0.05010600  |
| C | 1.64933400  | -0.73425500 | -0.04447400 |
| C | 4.41010700  | -1.28149500 | -0.07303000 |
| H | 4.65831000  | 0.86985500  | 0.13898200  |
| C | 2.11005000  | -2.04240600 | -0.16562000 |
| C | 3.48289000  | -2.31292000 | -0.17861200 |
| H | 5.47660800  | -1.50139100 | -0.08427700 |
| H | 1.41017900  | -2.87594800 | -0.25419100 |
| H | 3.82816100  | -3.34289900 | -0.27239800 |

#### Int\_4

Zero-point correction= 0.619462  
 Thermal correction to Energy= 0.660053  
 Thermal correction to Gibbs Free Energy= 0.549636  
 Lowest Frequency = 28.5363 cm<sup>-1</sup>  
 SCF (M06) Energy = -1718.3696267

|    |             |             |             |
|----|-------------|-------------|-------------|
| Rh | -1.40889600 | -0.45087400 | -0.24529500 |
| C  | -3.09351600 | -0.93110000 | -1.66807500 |
| C  | -1.85239600 | -1.14232700 | -2.34196300 |
| C  | -3.11264500 | -1.79697200 | -0.52784800 |
| C  | -1.19923100 | -2.29843400 | -1.72639000 |
| C  | -1.96071600 | -2.69059100 | -0.61596200 |
| C  | -4.20842600 | -0.04282200 | -2.09021400 |
| H  | -4.95564600 | -0.63679800 | -2.63625500 |
| H  | -4.71749400 | 0.42271400  | -1.23821100 |
| H  | -3.87625200 | 0.75414100  | -2.76384700 |
| C  | -1.42425000 | -0.53088700 | -3.63013800 |
| H  | -1.74062400 | -1.15874700 | -4.47653700 |
| H  | -1.86765100 | 0.46132200  | -3.77911000 |
| H  | -0.33255100 | -0.43229100 | -3.68982000 |
| C  | -0.00652000 | -2.97051300 | -2.30622100 |
| H  | -0.28220000 | -3.44445200 | -3.25993900 |
| H  | 0.79956600  | -2.25648100 | -2.52112400 |
| H  | 0.38484800  | -3.75749500 | -1.65145200 |
| C  | -1.71939400 | -3.83397000 | 0.30647400  |
| H  | -2.50865600 | -4.59100900 | 0.19568200  |
| H  | -0.76241300 | -4.32827800 | 0.10431400  |
| H  | -1.71873300 | -3.51564400 | 1.35645600  |
| C  | -4.21894500 | -1.91504800 | 0.46217300  |
| H  | -4.69594800 | -0.94431000 | 0.64838800  |
| H  | -4.99718900 | -2.60280400 | 0.09998500  |
| H  | -3.85931200 | -2.30328000 | 1.42307800  |
| C  | -2.39706500 | 1.69756100  | 1.49303500  |
| C  | -2.95332800 | 2.91042600  | 1.91365800  |
| C  | -3.28298600 | 3.87050300  | 0.97068300  |

|   |             |             |             |
|---|-------------|-------------|-------------|
| C | -3.06779400 | 3.60362900  | -0.38284500 |
| C | -2.52198900 | 2.38778000  | -0.79856100 |
| C | -2.16845100 | 1.41723300  | 0.13801100  |
| H | -3.11271900 | 3.07391100  | 2.97882700  |
| H | -3.70912000 | 4.82191900  | 1.28042400  |
| H | -3.32904800 | 4.35366200  | -1.12872600 |
| H | -2.37531800 | 2.21550900  | -1.86612700 |
| C | -2.03109200 | 0.68803400  | 2.48729000  |
| O | -2.25549300 | 0.69707200  | 3.67748000  |
| O | -0.90591900 | -1.42912700 | 2.50726000  |
| N | -1.37100400 | -0.39857900 | 1.81450000  |
| C | 0.69536600  | 0.34408500  | -0.20802400 |
| C | 0.87227700  | 1.42138500  | 0.81328500  |
| C | 1.11107800  | 0.61844400  | -1.60096000 |
| C | 0.83094800  | 2.84594200  | 0.30093600  |
| C | 0.85116400  | 2.03841500  | -2.05116400 |
| C | 1.46051900  | 3.05676700  | -1.07749800 |
| H | 1.32307800  | 3.46205500  | 1.06619400  |
| H | 1.28295200  | 2.14011200  | -3.05618300 |
| H | -0.23249100 | 2.21590900  | -2.12143300 |
| O | 1.64297700  | -0.19791000 | -2.33918500 |
| O | 1.02396200  | 1.18943700  | 2.00110200  |
| C | 2.97652400  | 2.86932000  | -1.00402800 |
| H | 3.43276900  | 2.98516900  | -1.99688300 |
| H | 3.42538700  | 3.61772400  | -0.33681900 |
| H | 3.26458500  | 1.87683300  | -0.62393200 |
| C | 1.14289800  | 4.46582400  | -1.56473200 |
| H | 1.54514100  | 5.21776300  | -0.87211200 |
| H | 1.58773200  | 4.64860200  | -2.55249300 |
| H | 0.05774200  | 4.62671500  | -1.64393000 |
| C | -0.37436400 | -1.22219000 | 3.84586300  |
| H | -1.17961200 | -1.16579500 | 4.57806700  |
| H | 0.24992600  | -2.10565500 | 4.00064700  |
| H | 0.22758300  | -0.30903100 | 3.85209700  |
| H | -0.22693300 | 3.15353200  | 0.27580800  |
| I | 1.74417500  | -1.44688800 | 0.51666700  |
| C | 3.75018900  | -0.73531800 | 0.36272100  |
| C | 4.41682600  | -0.89748800 | -0.84612300 |
| C | 4.29364500  | -0.06377200 | 1.45221000  |
| C | 5.70018200  | -0.36931900 | -0.95317100 |
| H | 3.94408300  | -1.39885500 | -1.68727600 |
| C | 5.57835800  | 0.45565100  | 1.31753400  |
| H | 3.73424600  | 0.06267300  | 2.37683000  |
| C | 6.27559000  | 0.30201200  | 0.12223900  |
| H | 6.24665100  | -0.48092200 | -1.88727000 |
| H | 6.03250400  | 0.98339200  | 2.15349700  |
| H | 7.27825200  | 0.71329200  | 0.02616800  |

#### Int\_5

|                               |          |
|-------------------------------|----------|
| Zero-point correction=        | 0.527355 |
| Thermal correction to Energy= | 0.560542 |

Thermal correction to Gibbs Free Energy= 0.466515

Lowest Frequency = 21.3841 cm<sup>-1</sup>

SCF (M06-SMD) Energy = -1475.6270936

|    |             |             |             |
|----|-------------|-------------|-------------|
| Rh | -0.71127300 | -0.25166600 | -0.00791900 |
| C  | -2.14768200 | -0.23069700 | -1.83946800 |
| C  | -1.61213900 | -1.55980400 | -1.68334400 |
| C  | -2.86747600 | 0.10336100  | -0.65859400 |
| C  | -2.07758100 | -2.07190400 | -0.42596100 |
| C  | -2.83767500 | -1.04476400 | 0.21480500  |
| C  | -2.04683300 | 0.61596800  | -3.05859900 |
| H  | -2.91617100 | 0.43711900  | -3.70841500 |
| H  | -2.02596500 | 1.68475300  | -2.81561000 |
| H  | -1.14838200 | 0.39485600  | -3.64604300 |
| C  | -0.85818600 | -2.34036500 | -2.70359600 |
| H  | -1.53526300 | -2.95997800 | -3.31073200 |
| H  | -0.31111200 | -1.68659800 | -3.39508400 |
| H  | -0.13278000 | -3.01645300 | -2.23192600 |
| C  | -1.88763100 | -3.46251600 | 0.07142900  |
| H  | -2.64238600 | -4.13034000 | -0.37056500 |
| H  | -0.89527500 | -3.84639600 | -0.18106300 |
| H  | -1.99295300 | -3.51776100 | 1.16111400  |
| C  | -3.58143800 | -1.14858400 | 1.49777500  |
| H  | -4.66242200 | -1.22464300 | 1.30901000  |
| H  | -3.27939400 | -2.02996500 | 2.07497800  |
| H  | -3.40534300 | -0.26006300 | 2.11543800  |
| C  | -3.57456700 | 1.38365500  | -0.37075000 |
| H  | -3.09794700 | 2.23081300  | -0.87978400 |
| H  | -4.62419300 | 1.34527800  | -0.69795100 |
| H  | -3.56523600 | 1.60766300  | 0.70346600  |
| C  | 0.24473400  | 2.51038100  | -0.11038100 |
| C  | 0.86720400  | 3.67475200  | -0.55520800 |
| C  | 1.56654600  | 3.66293200  | -1.75617700 |
| C  | 1.61804700  | 2.49454900  | -2.51606200 |
| C  | 0.96992500  | 1.33608300  | -2.08086300 |
| C  | 0.28690900  | 1.34575300  | -0.86834700 |
| H  | 0.78685100  | 4.56908200  | 0.06251700  |
| H  | 2.06898800  | 4.56278100  | -2.10714500 |
| H  | 2.16367600  | 2.48254000  | -3.45953400 |
| H  | 1.00812500  | 0.43583300  | -2.69880700 |
| C  | -0.49670300 | 2.47643900  | 1.18019900  |
| O  | -0.83289800 | 3.46893900  | 1.80535800  |
| O  | -1.63027600 | 1.02710700  | 2.54830100  |
| N  | -0.69228900 | 1.16365800  | 1.54657700  |
| C  | 0.93663300  | -0.97477800 | 0.62742600  |
| C  | 1.85583100  | -0.36587100 | 1.62761600  |
| C  | 1.63371500  | -2.01830200 | -0.16474300 |
| C  | 3.03225500  | 0.31204800  | 0.96197100  |
| C  | 2.86809300  | -1.44291200 | -0.84379400 |
| C  | 3.81947900  | -0.72913700 | 0.13678000  |
| H  | 3.66555300  | 0.74808800  | 1.74699400  |

|   |             |             |             |
|---|-------------|-------------|-------------|
| H | 3.37577200  | -2.27009500 | -1.36028900 |
| H | 2.53252500  | -0.71924000 | -1.60479200 |
| O | 1.28663100  | -3.17832600 | -0.29295500 |
| O | 1.74715800  | -0.53065200 | 2.82393700  |
| C | 4.45566500  | -1.75600400 | 1.07295100  |
| H | 5.03505100  | -2.49448400 | 0.50178200  |
| H | 5.13628200  | -1.26373200 | 1.78108400  |
| H | 3.70964800  | -2.30375500 | 1.66575300  |
| C | 4.90405200  | -0.01102700 | -0.65789400 |
| H | 5.60143200  | 0.50496100  | 0.01671000  |
| H | 5.48554300  | -0.72260900 | -1.26127300 |
| H | 4.46806800  | 0.73869600  | -1.33411300 |
| C | -1.10847400 | 0.27630500  | 3.62726700  |
| H | -0.21960200 | 0.76047500  | 4.04958800  |
| H | -1.91255000 | 0.23473800  | 4.37037700  |
| H | -0.83598900 | -0.74220800 | 3.30935600  |
| H | 2.67760700  | 1.12007100  | 0.30150800  |

## TS\_2

Zero-point correction= 0.527290  
 Thermal correction to Energy= 0.560112  
 Thermal correction to Gibbs Free Energy= 0.466605  
 Lowest Frequency = -216.2625 cm<sup>-1</sup>  
 SCF (M06-SMD) Energy = -1475.6159176

|    |            |             |             |
|----|------------|-------------|-------------|
| Rh | 0.90714800 | -0.21551000 | -0.07917400 |
| C  | 2.53238200 | -0.39457200 | 1.55370100  |
| C  | 2.02646300 | -1.71624500 | 1.22367500  |
| C  | 3.11283100 | 0.16191900  | 0.39312200  |
| C  | 2.33136500 | -1.97240000 | -0.14549300 |
| C  | 2.95469200 | -0.79225600 | -0.68267600 |
| C  | 2.43780400 | 0.26472700  | 2.88627000  |
| H  | 3.32407800 | 0.04799600  | 3.49988900  |
| H  | 2.35675500 | 1.35372100  | 2.78242700  |
| H  | 1.55529100 | -0.06957300 | 3.44459400  |
| C  | 1.44867800 | -2.70161800 | 2.17910300  |
| H  | 2.19849500 | -3.45185600 | 2.47114000  |
| H  | 1.09839100 | -2.21909700 | 3.09985600  |
| H  | 0.60279300 | -3.23784500 | 1.73108700  |
| C  | 2.08714000 | -3.24534100 | -0.87807600 |
| H  | 2.98231900 | -3.88464800 | -0.84982500 |
| H  | 1.24987900 | -3.80002700 | -0.44338000 |
| H  | 1.84543200 | -3.05942300 | -1.93138900 |
| C  | 3.47554500 | -0.59844700 | -2.06261400 |
| H  | 4.56937200 | -0.71614200 | -2.09228000 |
| H  | 3.04084000 | -1.31754200 | -2.76686200 |
| H  | 3.23633200 | 0.41187300  | -2.41767800 |
| C  | 3.73379300 | 1.50798300  | 0.24444200  |
| H  | 3.46706800 | 2.17127800  | 1.07606200  |
| H  | 4.83082600 | 1.43282700  | 0.21574800  |
| H  | 3.40047500 | 1.99008100  | -0.68342100 |

|   |             |             |             |
|---|-------------|-------------|-------------|
| C | -0.69483200 | 2.06926000  | 0.84986400  |
| C | -1.40415100 | 2.90214800  | 1.70769800  |
| C | -1.97308400 | 2.38207000  | 2.86786100  |
| C | -1.80731700 | 1.03430400  | 3.18099400  |
| C | -1.09026000 | 0.19557400  | 2.32472100  |
| C | -0.54209600 | 0.71528400  | 1.15544900  |
| H | -1.48351900 | 3.95572200  | 1.44003500  |
| H | -2.54099300 | 3.02842200  | 3.53505700  |
| H | -2.23724900 | 0.62910800  | 4.09663500  |
| H | -0.97002400 | -0.86094200 | 2.57699400  |
| C | -0.03759300 | 2.62956100  | -0.37515700 |
| O | -0.11933900 | 3.80663700  | -0.70166700 |
| C | 0.84817800  | 1.83016000  | -3.30151900 |
| H | -0.08584000 | 2.40265800  | -3.37894600 |
| H | 1.57134800  | 2.19044000  | -4.04154800 |
| H | 0.63261100  | 0.76336700  | -3.45832500 |
| O | 1.45649400  | 2.04164400  | -2.03953000 |
| N | 0.62359900  | 1.62939100  | -1.01846200 |
| C | -0.88219900 | -0.68144300 | -0.57455700 |
| C | -1.81949300 | 0.04947100  | -1.49593200 |
| C | -1.60367600 | -1.90232900 | -0.02944000 |
| C | -3.14285000 | 0.45292200  | -0.90485400 |
| C | -3.04164100 | -1.69499800 | 0.40935800  |
| C | -3.90864500 | -0.83679700 | -0.52731500 |
| H | -3.70376200 | 1.02734000  | -1.65445800 |
| H | -3.00793600 | 1.07147200  | -0.00530200 |
| H | -3.48794900 | -2.68761300 | 0.56438100  |
| H | -2.99714900 | -1.19962300 | 1.39339300  |
| O | -1.05248900 | -2.98115000 | 0.07024700  |
| O | -1.60441500 | 0.05500000  | -2.69170800 |
| C | -4.26195300 | -1.63302100 | -1.78268700 |
| H | -4.84753400 | -2.52437800 | -1.51762300 |
| H | -4.86396700 | -1.02428800 | -2.47132200 |
| H | -3.37347900 | -1.96801900 | -2.33512400 |
| C | -5.18644700 | -0.44438700 | 0.20625500  |
| H | -5.83708700 | 0.16015100  | -0.44076700 |
| H | -5.75198700 | -1.33521800 | 0.51508700  |
| H | -4.95849200 | 0.14579300  | 1.10600700  |

### Int\_6

Zero-point correction= 0.529003  
 Thermal correction to Energy= 0.561835  
 Thermal correction to Gibbs Free Energy= 0.468601  
 Lowest Frequency = 30.6166 cm<sup>-1</sup>  
 SCF (M06-SMD) Energy = -1475.6714592

|    |            |             |             |
|----|------------|-------------|-------------|
| Rh | 1.01967500 | -0.26997800 | -0.10227400 |
| C  | 2.47368800 | 0.50471900  | 1.22818300  |
| C  | 1.89377000 | -0.65085800 | 1.88068900  |
| C  | 3.26525400 | 0.04477700  | 0.09861500  |
| C  | 2.16076700 | -1.77809900 | 1.05886800  |

|   |             |             |             |
|---|-------------|-------------|-------------|
| C | 3.02501100  | -1.33427300 | -0.03365100 |
| C | 2.42894500  | 1.90125600  | 1.74000800  |
| H | 3.24113800  | 2.08413600  | 2.46014700  |
| H | 2.52941800  | 2.62281000  | 0.92087700  |
| H | 1.47748900  | 2.10809700  | 2.24722100  |
| C | 1.17741500  | -0.58902100 | 3.18337100  |
| H | 1.89435700  | -0.38871700 | 3.99365000  |
| H | 0.43928400  | 0.22570400  | 3.19252900  |
| H | 0.64641800  | -1.51778900 | 3.40409700  |
| C | 1.76731100  | -3.19616400 | 1.29022700  |
| H | 2.62955100  | -3.80030000 | 1.61104000  |
| H | 0.98192200  | -3.27476100 | 2.04758800  |
| H | 1.37253400  | -3.64941100 | 0.37025000  |
| C | 3.49776000  | -2.23123900 | -1.12262900 |
| H | 4.19015800  | -2.99311200 | -0.73571300 |
| H | 2.65404600  | -2.76252600 | -1.58519200 |
| H | 4.01271900  | -1.67397200 | -1.91283000 |
| C | 4.09658500  | 0.92328600  | -0.76656600 |
| H | 3.54388400  | 1.82232400  | -1.06066300 |
| H | 5.01057400  | 1.23413500  | -0.23918400 |
| H | 4.39508200  | 0.41605000  | -1.69117100 |
| C | -1.23689000 | 2.30529600  | 0.02061800  |
| C | -1.68793900 | 3.54116200  | 0.48096400  |
| C | -2.30261500 | 3.66848900  | 1.72010300  |
| C | -2.46311900 | 2.54027100  | 2.51799200  |
| C | -2.06194500 | 1.29495900  | 2.04942700  |
| C | -1.47740700 | 1.14376000  | 0.78138200  |
| H | -1.51709800 | 4.40262600  | -0.16215600 |
| H | -2.63708400 | 4.64350800  | 2.07010900  |
| H | -2.91436000 | 2.62351000  | 3.50576000  |
| H | -2.21053700 | 0.41989100  | 2.68464700  |
| C | -0.41771000 | 2.34143200  | -1.23682800 |
| O | -0.60552200 | 3.20636700  | -2.09036300 |
| C | 0.97045600  | 0.99735600  | -3.51087800 |
| H | -0.03237500 | 1.37382100  | -3.75505600 |
| H | 1.66815800  | 1.28862200  | -4.30368800 |
| H | 0.95139500  | -0.09970400 | -3.41843000 |
| O | 1.45672600  | 1.60302000  | -2.33004400 |
| N | 0.58249600  | 1.41732900  | -1.25839800 |
| C | -1.05783100 | -0.19256700 | 0.28812600  |
| C | -1.34549400 | -0.62630600 | -1.11911800 |
| C | -1.73483900 | -1.33181600 | 1.06908100  |
| C | -2.74548500 | -0.65350500 | -1.61505000 |
| C | -3.21337000 | -1.48369000 | 0.73050700  |
| C | -3.47213900 | -1.73913000 | -0.76919100 |
| H | -2.78518900 | -0.90604400 | -2.68276400 |
| H | -3.22401600 | 0.32379100  | -1.44936100 |
| H | -3.62306300 | -2.30721100 | 1.33101800  |
| H | -3.72891300 | -0.55486300 | 1.02235900  |
| O | -1.18237100 | -2.06978400 | 1.85324800  |
| O | -0.41289400 | -1.21449700 | -1.67991500 |

|   |             |             |             |
|---|-------------|-------------|-------------|
| C | -2.96789400 | -3.13042600 | -1.15025600 |
| H | -3.51728100 | -3.89841100 | -0.58858400 |
| H | -3.12158500 | -3.31995700 | -2.22163200 |
| H | -1.89868500 | -3.26811100 | -0.93925000 |
| C | -4.96850400 | -1.64719200 | -1.04399900 |
| H | -5.18050300 | -1.82875600 | -2.10698000 |
| H | -5.51796100 | -2.39779900 | -0.45864500 |
| H | -5.36254100 | -0.65559500 | -0.78225600 |

### Int\_7

Zero-point correction= 0.327834  
 Thermal correction to Energy= 0.347794  
 Thermal correction to Gibbs Free Energy= 0.279714  
 Lowest Frequency = 42.2180 cm<sup>-1</sup>  
 SCF (M06-SMD) Energy = -976.3943233

|   |             |             |             |
|---|-------------|-------------|-------------|
| C | -2.07364800 | -0.72591000 | 0.09158100  |
| C | -0.72558600 | -1.11289900 | 0.02308700  |
| C | -3.08276700 | -1.67973300 | -0.07330700 |
| C | -0.43485000 | -2.44486600 | -0.28139900 |
| C | -2.77501700 | -2.99792000 | -0.36749100 |
| C | -1.44159600 | -3.37707600 | -0.48708100 |
| H | -4.11612100 | -1.35256100 | 0.02418000  |
| H | 0.60513900  | -2.76263500 | -0.33438500 |
| H | -3.57017300 | -3.72772400 | -0.50754300 |
| H | -1.18224700 | -4.40662000 | -0.72739800 |
| O | -2.48469900 | 2.86364800  | -0.53754800 |
| N | -1.86302800 | 1.63345300  | -0.39741400 |
| C | -2.57789500 | 0.66882500  | 0.30001900  |
| O | -3.52859000 | 0.93879800  | 1.00531900  |
| H | -1.43692300 | 1.35244600  | -1.28157000 |
| C | 0.41950800  | -0.16448600 | 0.27325800  |
| C | 1.49118700  | -0.68495900 | 1.23893800  |
| C | 0.99978800  | 0.41560100  | -1.02291400 |
| C | 2.71916300  | 0.18680800  | 1.34338000  |
| C | 2.33379800  | 1.11318900  | -0.93110700 |
| C | 3.35795300  | 0.41379100  | -0.03420000 |
| H | 2.43864200  | 1.16285700  | 1.77643700  |
| H | 2.12962200  | 2.12206200  | -0.52661200 |
| O | 1.36585400  | -1.70626200 | 1.87248200  |
| O | 0.35810700  | 0.39774900  | -2.05226700 |
| H | 3.42262600  | -0.29921400 | 2.03245800  |
| H | 2.71253500  | 1.25258300  | -1.95307900 |
| C | 3.76074600  | -0.92648100 | -0.64894600 |
| H | 4.24153800  | -0.77669700 | -1.62535100 |
| H | 4.46849400  | -1.45732500 | 0.00241200  |
| H | 2.89991600  | -1.59380300 | -0.80626200 |
| C | 4.58944100  | 1.29791700  | 0.11518400  |
| H | 5.34252000  | 0.81517500  | 0.75333400  |
| H | 5.05214900  | 1.49257600  | -0.86270800 |
| H | 4.33408600  | 2.26680800  | 0.56766700  |



|   |             |            |            |
|---|-------------|------------|------------|
| C | -2.17656400 | 3.68902700 | 0.56936600 |
| H | -2.65618000 | 4.64967100 | 0.35857900 |
| H | -2.58607300 | 3.27025900 | 1.49728400 |
| H | -1.08930300 | 3.83130500 | 0.66669300 |
| H | 0.04360500  | 0.75023100 | 0.77366600 |

**Product 3aa**

Zero-point correction = 0.327834  
 Thermal correction to Energy = 0.347794  
 Thermal correction to Gibbs Free Energy = 0.279714  
 Lowest Frequency = 42.2180 cm<sup>-1</sup>  
 SCF (M06-SMD) Energy = -899.986881

|   |             |             |             |
|---|-------------|-------------|-------------|
| C | -2.16948600 | 0.22184000  | 0.12395200  |
| C | -1.36636200 | -0.92504000 | -0.07498800 |
| C | -3.56280000 | 0.12948100  | 0.23409600  |
| C | -2.03082900 | -2.16519400 | -0.16575800 |
| C | -4.18652000 | -1.09698600 | 0.14496100  |
| C | -3.40742000 | -2.24052200 | -0.05776600 |
| H | -4.12045900 | 1.05061900  | 0.38864600  |
| H | -1.44299400 | -3.06157300 | -0.31733500 |
| H | -5.26870000 | -1.17441800 | 0.22944100  |
| H | -3.88782200 | -3.21522800 | -0.13293300 |
| O | 0.39852500  | 2.80806400  | 0.25678600  |
| N | -0.19614500 | 1.58117100  | 0.08653000  |
| C | -1.59991600 | 1.56135500  | 0.22328900  |
| O | -2.21672500 | 2.59746600  | 0.38208200  |
| C | 0.08041500  | -0.76754800 | -0.17474600 |
| C | 0.62739100  | 0.49231800  | -0.06186900 |
| C | 0.99925200  | -1.90379700 | -0.40658300 |
| C | 2.09589900  | 0.79206600  | -0.08912900 |
| C | 2.45571500  | -1.57502000 | -0.65668300 |
| C | 2.97868400  | -0.42234700 | 0.19066300  |
| H | 2.34676100  | 1.20759500  | -1.08219400 |
| H | 2.55963800  | -1.31666000 | -1.72586000 |
| O | 0.63933900  | -3.07031100 | -0.44646100 |
| H | 2.31155900  | 1.59466100  | 0.62840500  |
| H | 3.03000600  | -2.49716600 | -0.49388300 |
| C | 2.93678100  | -0.78622900 | 1.67477400  |
| H | 3.54302900  | -1.68199300 | 1.86789100  |
| H | 3.34286400  | 0.03231900  | 2.28561200  |
| H | 1.91732200  | -0.99208200 | 2.02640700  |
| C | 4.41512900  | -0.09426300 | -0.19784500 |
| H | 4.78863900  | 0.76946200  | 0.37128800  |
| H | 5.07801500  | -0.94515300 | 0.01169300  |
| H | 4.49917800  | 0.14328700  | -1.26816100 |
| C | 0.28343800  | 3.59728600  | -0.92553500 |
| H | -0.76633400 | 3.82782000  | -1.13415000 |
| H | 0.83102300  | 4.51655000  | -0.70177200 |
| H | 0.74595400  | 3.08762000  | -1.78306100 |

**N-Methoxy Benzamide**

Zero-point correction = 0.159856  
Thermal correction to Energy= 0.169907  
Thermal correction to Gibbs Free Energy= 0.123802  
Lowest Frequency = 62.0051 cm<sup>-1</sup>  
SCF (M06) Energy = -515.2236857

|   |             |             |             |
|---|-------------|-------------|-------------|
| C | -1.13040800 | -1.16659000 | 0.14423100  |
| C | -0.64532100 | 0.13655600  | 0.00527200  |
| C | -1.54427600 | 1.19987300  | -0.09584700 |
| C | -2.91154400 | 0.96142400  | -0.08612000 |
| C | -3.39105900 | -0.34023900 | 0.03922900  |
| C | -2.50018300 | -1.40250000 | 0.16083700  |
| H | -0.43796300 | -1.99677300 | 0.27929100  |
| H | -1.14155300 | 2.20748500  | -0.17999600 |
| H | -3.60871200 | 1.79296500  | -0.17261700 |
| H | -4.46371700 | -0.52663100 | 0.05140000  |
| H | -2.87407900 | -2.41794400 | 0.27953900  |
| C | 0.80795500  | 0.47142600  | -0.02496400 |
| H | 1.28022000  | -1.27827700 | -1.01939900 |
| O | 1.24740100  | 1.56821200  | 0.25557100  |
| C | 3.73006200  | -0.32880400 | 0.52025500  |
| H | 4.75284400  | -0.12494000 | 0.18929400  |
| H | 3.41280600  | 0.44394500  | 1.23183000  |
| H | 3.68013700  | -1.31953400 | 0.99406100  |
| O | 2.94109700  | -0.28708100 | -0.65579200 |
| N | 1.62866600  | -0.60231700 | -0.34700000 |

**Compound\_2a**

Zero-point correction = 0.254536  
Thermal correction to Energy = 0.271343  
Thermal correction to Gibbs Free Energy = 0.208054  
Lowest Frequency = 27.0418 cm<sup>-1</sup>  
SCF (M06-SMD) Energy = -703.7997304

|   |            |             |             |
|---|------------|-------------|-------------|
| C | 0.76011800 | -0.96267200 | -0.00000400 |
| C | 1.34515600 | -0.63591300 | -1.31640500 |
| C | 1.34519300 | -0.63595000 | 1.31638700  |
| C | 2.75834900 | -0.11672500 | -1.24943000 |
| C | 2.75838700 | -0.11676500 | 1.24939000  |
| C | 3.04644000 | 0.72911500  | -0.00000700 |
| H | 2.94319600 | 0.44457100  | -2.17539800 |
| H | 2.94326100 | 0.44449200  | 2.17537600  |
| H | 3.42987200 | -0.99302700 | 1.26986200  |
| O | 0.69922300 | -0.76788100 | 2.33917700  |
| O | 0.69915700 | -0.76780800 | -2.33917600 |
| C | 2.17672000 | 1.98781000  | 0.00003100  |
| H | 2.38568400 | 2.60075900  | 0.88663700  |
| H | 2.38569800 | 2.60082200  | -0.88652900 |
| H | 1.09528100 | 1.76827700  | 0.00001400  |

|   |             |             |             |
|---|-------------|-------------|-------------|
| C | 4.51809300  | 1.12566000  | -0.00001800 |
| H | 4.76084300  | 1.72653400  | -0.88635300 |
| H | 4.76086100  | 1.72652200  | 0.88631900  |
| H | 5.17391700  | 0.24421400  | -0.00003100 |
| H | 3.42983400  | -0.99298600 | -1.26995300 |
| I | -1.28450200 | -1.56114600 | -0.00000400 |
| C | -1.85808900 | 0.51423900  | 0.00000600  |
| C | -1.99414300 | 1.13847300  | 1.23135100  |
| C | -1.99417400 | 1.13847900  | -1.23133000 |
| C | -2.30095000 | 2.49702900  | 1.21113300  |
| H | -1.86412400 | 0.60536700  | 2.17011200  |
| C | -2.30097000 | 2.49703700  | -1.21109700 |
| H | -1.86417400 | 0.60538800  | -2.17009900 |
| C | -2.45224600 | 3.16769000  | 0.00002400  |
| H | -2.42188700 | 3.02585300  | 2.15396100  |
| H | -2.42192500 | 3.02587000  | -2.15391700 |
| H | -2.69205300 | 4.22858100  | 0.00003300  |

#### Iodo benzene

Zero-point correction= 0.089679  
 Thermal correction to Energy= 0.095610  
 Thermal correction to Gibbs Free Energy= 0.057902  
 SCF (M06-SMD) Energy = -242.9092828

|   |             |             |             |
|---|-------------|-------------|-------------|
| I | -1.55815400 | 0.00000000  | 0.00001700  |
| C | 0.57402200  | 0.00000000  | -0.00006400 |
| C | 1.25568500  | -1.21162000 | -0.00010500 |
| C | 1.25568500  | 1.21162000  | -0.00010500 |
| C | 2.64770500  | -1.20372300 | 0.00002600  |
| H | 0.70967200  | -2.15257300 | -0.00018500 |
| C | 2.64770500  | 1.20372300  | 0.00002600  |
| H | 0.70967200  | 2.15257300  | -0.00018500 |
| C | 3.34491400  | 0.00000000  | 0.00008600  |
| H | 3.18765200  | -2.14923900 | 0.00007200  |
| H | 3.18765200  | 2.14923900  | 0.00007200  |
| H | 4.43321600  | 0.00000000  | 0.00010500  |

#### Acetic acid

Zero-point correction= 0.062337  
 Thermal correction to Energy= 0.066806  
 Thermal correction to Gibbs Free Energy= 0.035470  
 SCF (M06-SMD) Energy = -229.0412511

|   |             |             |             |
|---|-------------|-------------|-------------|
| C | -1.38738700 | -0.09771600 | 0.00001400  |
| H | -1.67932100 | -0.67914700 | 0.88211200  |
| H | -1.67937700 | -0.68112000 | -0.88074600 |
| H | -1.90452400 | 0.86389000  | -0.00096800 |
| C | 0.09289800  | 0.12493400  | -0.00018500 |
| O | 0.65509000  | 1.19169300  | 0.00004400  |
| O | 0.76047300  | -1.04812900 | 0.00001100  |
| H | 1.70565000  | -0.81544600 | 0.00019100  |

### Acetate ion

Zero-point correction= 0.048439  
Thermal correction to Energy= 0.052014  
Thermal correction to Gibbs Free Energy= 0.022550  
SCF (M06-SMD) Energy = -228.5610098

|   |             |             |             |
|---|-------------|-------------|-------------|
| C | -0.21955000 | 0.00008100  | -0.01287500 |
| O | -0.74446100 | 1.13533400  | 0.00285400  |
| O | -0.74905400 | -1.13297100 | 0.00285400  |
| C | 1.34416500  | -0.00225600 | -0.00493100 |
| H | 1.70127900  | 0.01272200  | 1.03728200  |
| H | 1.74869100  | -0.91007000 | -0.47563500 |
| H | 1.75046200  | 0.89149800  | -0.50047000 |

## 23. Optical Properties of Compounds (6a–e)

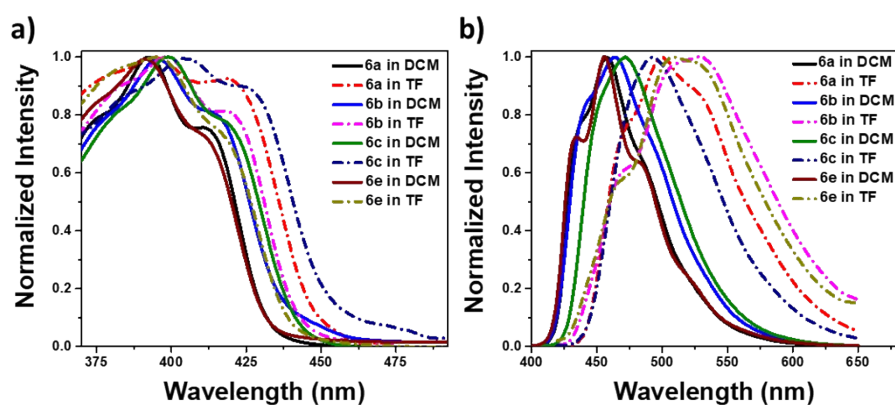

**Figure 1.** (a) Normalized absorption of **6a**, **6b**, **6c**, and **6e** in DCM solution (solid line), and thin film (dotted line); (b) Normalized fluorescence **6a**, **6b**, **6c**, and **6e** in DCM solution (solid line), and thin film (dotted line); Con 5.0  $\mu\text{M}$ ; Excitation wavelength is 380 nm.

**Table 4.** optical data

| entry | $\lambda_{\text{max, abs}}$ |                 | $\lambda_{\text{max, emi}}$ |                    | Stokes shift ( $\text{cm}^{-1}$ ) |                 |
|-------|-----------------------------|-----------------|-----------------------------|--------------------|-----------------------------------|-----------------|
|       | sol <sup>a</sup>            | TF <sup>b</sup> | sol <sup>a, c</sup>         | TF <sup>b, d</sup> | sol <sup>a</sup>                  | TF <sup>b</sup> |
| 6a    | 392                         | 394             | 458                         | 500                | 3676                              | 5381            |
| 6b    | 396                         | 398             | 464                         | 529                | 3701                              | 6222            |
| 6c    | 399                         | 404             | 472                         | 492                | 3876                              | 4427            |
| 6d    | 391                         | 402             | 458                         | 510                | 3741                              | 5268            |
| 6e    | 394                         | 395             | 456                         | 512                | 3451                              | 5785            |

<sup>a</sup> sol-in DCM solvent at 5  $\mu\text{M}$ . <sup>b</sup> TF-thin-film. <sup>c</sup> Excitation wavelength: 380 nm. <sup>d</sup> Excitation wavelength: 400 nm. <sup>e</sup> Stokes shift =  $\lambda_{\text{max, abs}} - \lambda_{\text{max, emi}}$  ( $\text{cm}^{-1}$ ).

## 24. UV-vis absorption and emission spectra of 6a-e (in DCM solution and thin film state)

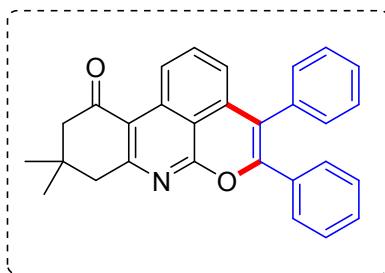

Compound **6a** yellow solid

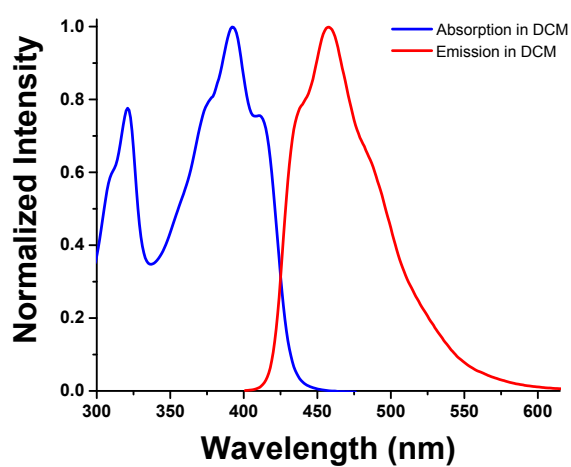

Figure ESI-1. Normalized absorption (blue) and Emission (red) spectra of compound **6a** in DCM solution.  
(Excitation wavelength: 380 nm)

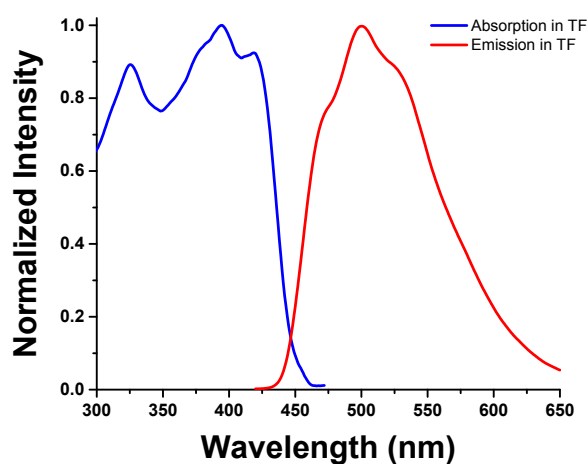

Figure ESI-2. Normalized absorption (blue) and Emission (red) spectra of compound **6a** in thin film.  
(Excitation wavelength: 400 nm)

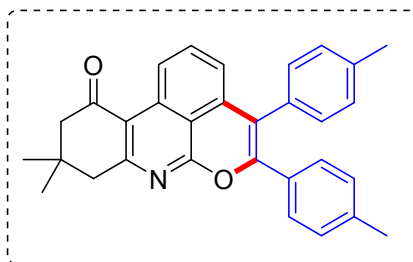

Compound **6b** yellow solid

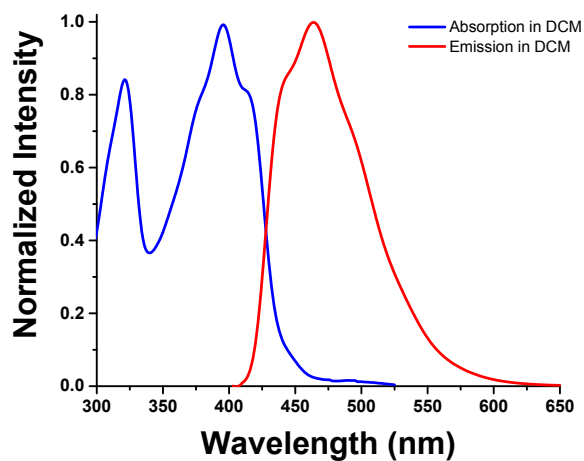

Figure ESI-3. Normalized absorption (blue) and Emission (red) spectra of compound **6b** in DCM solution.  
(Excitation wavelength: 380 nm)

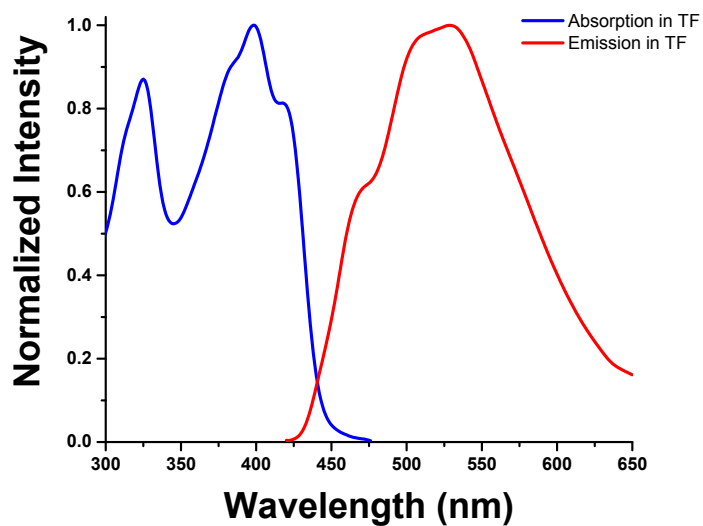

Figure ESI-4. Normalized absorption (blue) and Emission (red) spectra of compound **6b** in thin film.  
(Excitation wavelength: 400 nm)

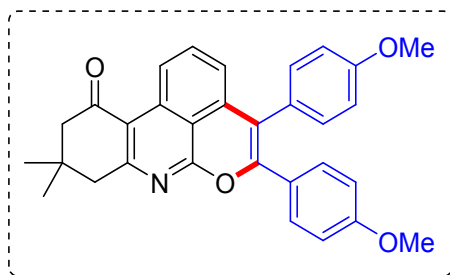

Compound **6c** yellow solid

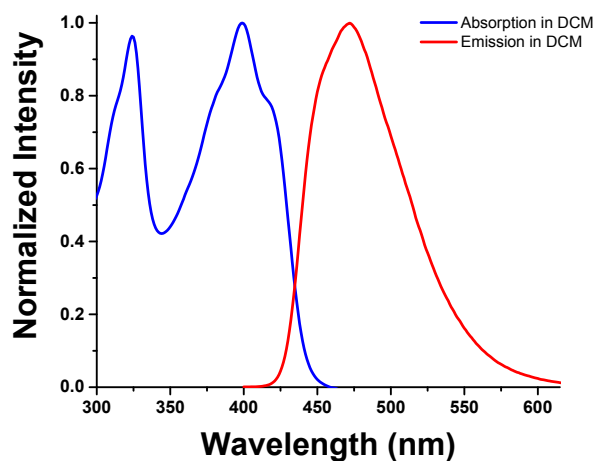

Figure ESI-5. Normalized absorption (blue) and Emission (red) spectra of compound **6c** in DCM. (Excitation wavelength: 380 nm)

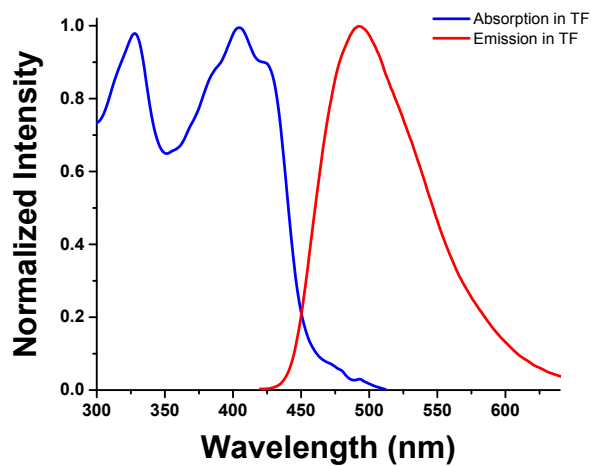

Figure ESI- 6. Normalized absorption (blue) and Emission (red) spectra of compound **6c** in thin film. (Excitation wavelength: 400 nm)

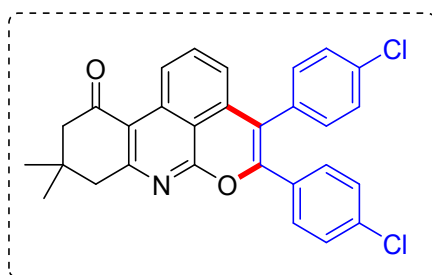

Compound **6d** yellow solid

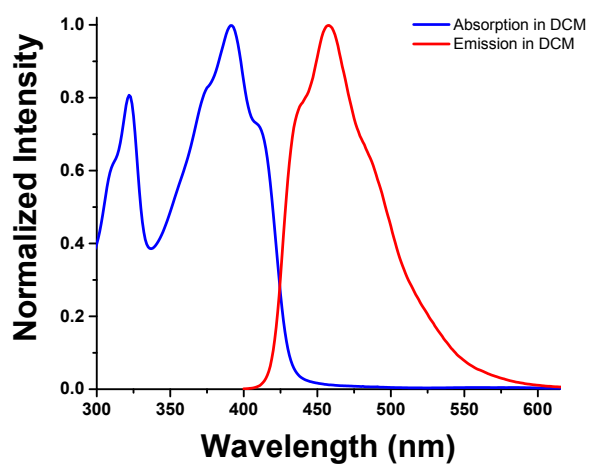

Figure ESI-7. Normalized absorption (blue) and Emission (red) spectra of compound **6d** in DCM. (Excitation wavelength: 380 nm)

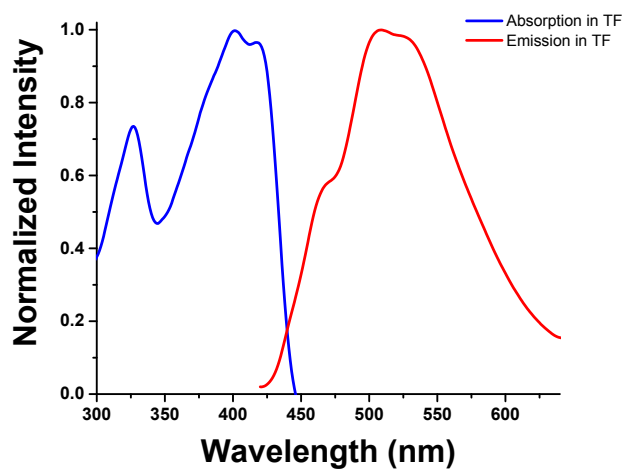

Figure ESI-8. Normalized absorption (blue) and Emission (red) spectra of compound **6d** in thin film. (Excitation wavelength: 400 nm)



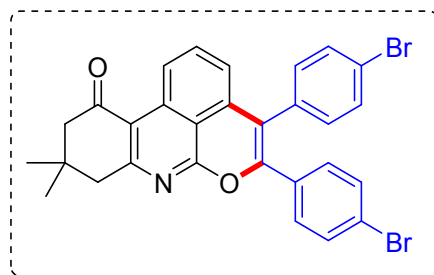

Compound **6e** yellow solid

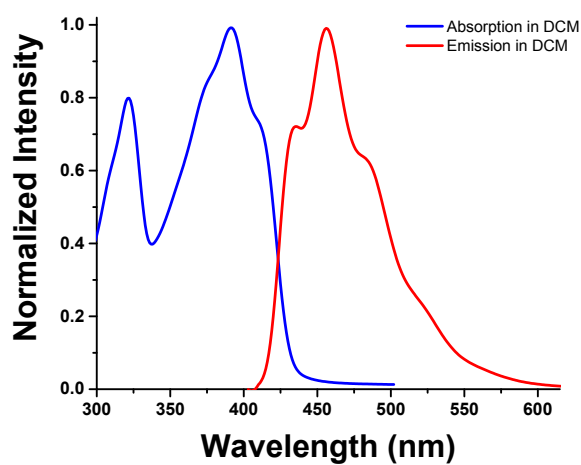

Figure ESI-9. Normalized absorption (blue) and Emission (red) spectra of compound **6e** in DCM. (Excitation wavelength: 380 nm)

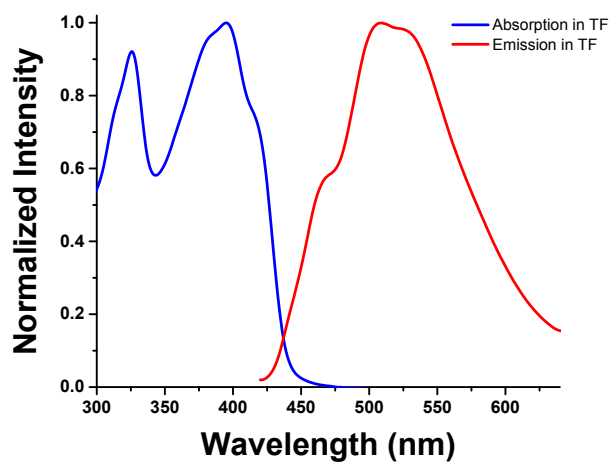

Figure ESI-10. Normalized absorption (blue) and Emission (red) spectra of compound **6e** in thin film. (Excitation wavelength: 400 nm)

## 25. $^1\text{H}$ , $^{13}\text{C}$ NMR and HRMS spectral data for compounds 3a-3ag

### 5-methoxy-3,3-dimethyl-3,4-dihydrophenanthridine-1,6(2H,5H)-dione (3a)

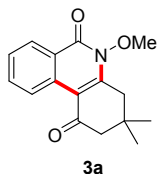

Colourless solid; Eluent (20% ethyl acetate in hexane); Yield 95%; Melting point 110-112 °C;  $^1\text{H}$  NMR (400 MHz,  $\text{CDCl}_3$ )  $\delta$  9.28 (d,  $J$  = 8.5 Hz, 1H), 8.43 (d,  $J$  = 8.0 Hz, 1H), 7.74 (t,  $J$  = 7.8 Hz, 1H), 7.51 (t,  $J$  = 7.5 Hz, 1H), 4.11 (s, 3H), 3.03 (s, 2H), 2.53 (s, 2H), 1.19 (s, 6H) ppm;  $^{13}\text{C}$  NMR (100 MHz,  $\text{CDCl}_3$ )  $\delta$  196.40, 158.87, 151.59, 133.89, 133.34, 127.55, 127.23, 126.34, 125.20, 109.02, 64.29, 52.66, 38.54, 32.02, 28.42 ppm; HRMS  $m/z$  (ESI): Calculated for  $\text{C}_{16}\text{H}_{18}\text{NO}_3$  [ $\text{M} + \text{H}$ ] $^+$  272.1287; found 272.1288.

### 5-methoxy-3,3,9-trimethyl-3,4-dihydrophenanthridine-1,6(2H,5H)-dione (3b)

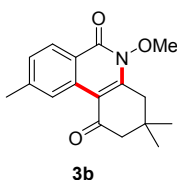

Colourless solid; Eluent (20% ethyl acetate in hexane); Yield 96%; Melting point 116-118 °C;  $^1\text{H}$  NMR (400 MHz,  $\text{CDCl}_3$ )  $\delta$  9.09 (s, 1H), 8.31 (d,  $J$  = 8.2 Hz, 1H), 7.33 (d,  $J$  = 8.2 Hz, 1H), 4.09 (s, 3H), 3.01 (s, 2H), 2.51 (d,  $J$  = 1.9 Hz, 5H), 1.18 (s, 6H) ppm;  $^{13}\text{C}$  NMR (100 MHz,  $\text{CDCl}_3$ )  $\delta$  196.51, 158.82, 151.63, 144.79, 133.36, 128.72, 127.52, 126.06, 122.92, 108.86, 64.28, 52.71, 38.55, 31.98, 28.39, 22.52 ppm; HRMS  $m/z$  (ESI): Calculated for  $\text{C}_{17}\text{H}_{20}\text{NO}_3$  [ $\text{M} + \text{H}$ ] $^+$  286.1443; found 300.1598.

### 9-ethyl-5-methoxy-3,3-dimethyl-3,4-dihydrophenanthridine-1,6(2H,5H)-dione (3c)

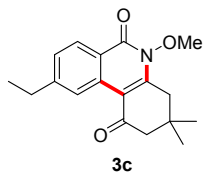

Colourless solid; Eluent (20% ethyl acetate in hexane); Yield 78%; Melting point 108-110 °C;  $^1\text{H}$  NMR (400 MHz,  $\text{CDCl}_3$ )  $\delta$  9.13 (s, 1H), 8.34 (d,  $J$  = 8.2 Hz, 1H), 7.36 (d,  $J$  = 8.3 Hz, 1H), 4.09 (s, 3H), 3.01 (s, 2H), 2.80 (q,  $J$  = 7.6 Hz, 2H), 2.51 (s, 2H), 1.30 (t,  $J$  = 7.6 Hz, 3H), 1.19 (s, 6H) ppm;  $^{13}\text{C}$  NMR (100 MHz,  $\text{CDCl}_3$ )  $\delta$  196.54, 158.81, 151.60, 150.95, 133.50, 127.65, 127.60, 125.04, 123.12, 108.94, 64.27, 52.74, 38.55, 31.99, 29.77, 28.40, 15.52 ppm; HRMS  $m/z$  (ESI): Calculated for  $\text{C}_{18}\text{H}_{22}\text{NO}_3$  [ $\text{M} + \text{H}$ ] $^+$  300.1600; found 300.1598.

### 9-butyl-5-methoxy-3,3-dimethyl-3,4-dihydrophenanthridine-1,6(2H,5H)-dione (3d)

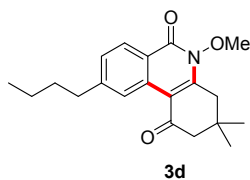

Viscous liquid; Eluent (20% ethyl acetate in hexane); Yield 83%;  $^1\text{H}$  NMR (400 MHz,  $\text{CDCl}_3$ )  $\delta$  9.10 (s, 1H), 8.32 (d,  $J = 8.2$  Hz, 1H), 7.33 (d,  $J = 8.3$  Hz, 1H), 4.08 (s, 3H), 3.01 (s, 2H), 2.78 – 2.73 (m, 2H), 2.51 (s, 2H), 1.65 (td,  $J = 7.3, 6.7, 3.7$  Hz, 2H), 1.36 (dt,  $J = 14.7, 7.4$  Hz, 2H), 1.18 (s, 6H), 0.93 (t,  $J = 7.3$  Hz, 3H) ppm;  $^{13}\text{C}$  NMR (100 MHz,  $\text{CDCl}_3$ )  $\delta$  196.53, 158.80, 151.57, 149.68, 133.39, 128.06, 127.51, 125.56, 123.06, 108.91, 64.25, 52.72, 38.53, 36.49, 33.54, 31.97, 28.38, 22.54, 14.04 ppm; HRMS  $m/z$  (ESI): Calculated for  $\text{C}_{20}\text{H}_{26}\text{NO}_3$   $[\text{M} + \text{H}]^+$  328.1913; found 328.1915.

### 9-hexyl-5-methoxy-3,3-dimethyl-3,4-dihydrophenanthridine-1,6(2H,5H)-dione (3e)

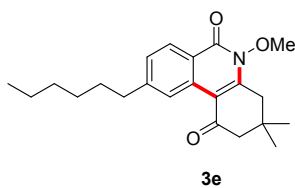

Colourless solid; Eluent (15% ethyl acetate in hexane); Yield 88%; Melting point 110-112 °C;  $^1\text{H}$  NMR (400 MHz,  $\text{CDCl}_3$ )  $\delta$  9.10 (s, 1H), 8.32 (d,  $J = 8.3$  Hz, 1H), 7.34 (dd,  $J = 8.3, 1.7$  Hz, 1H), 4.09 (s, 3H), 3.01 (s, 2H), 2.78 – 2.73 (m, 2H), 2.51 (s, 2H), 1.70 – 1.63 (m, 2H), 1.36 – 1.27 (m, 6H), 1.19 (s, 6H), 0.89 – 0.85 (m, 3H) ppm;  $^{13}\text{C}$  NMR (100 MHz,  $\text{CDCl}_3$ )  $\delta$  196.53, 158.83, 151.57, 149.76, 133.42, 128.07, 127.53, 125.58, 123.09, 108.95, 64.27, 52.75, 38.56, 36.84, 31.99, 31.81, 31.42, 29.17, 28.41, 22.70, 14.20 ppm.

### 9-(tert-butyl)-5-methoxy-3,3-dimethyl-3,4-dihydrophenanthridine-1,6(2H,5H)-dione (3f)

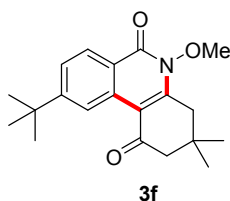

Colourless solid; Eluent (20% ethyl acetate in hexane); Yield 76%; Melting point 186-188 °C;  $^1\text{H}$  NMR (400 MHz,  $\text{CDCl}_3$ )  $\delta$  9.38 (dd,  $J = 1.9, 0.6$  Hz, 1H), 8.35 (dd,  $J = 8.6, 0.5$  Hz, 1H), 7.58 (dd,  $J = 8.6, 1.9$  Hz, 1H), 4.09 (s, 3H), 3.02 (s, 2H), 2.52 (s, 2H), 1.40 (s, 9H), 1.20 (s, 6H) ppm;  $^{13}\text{C}$  NMR (100 MHz,  $\text{CDCl}_3$ )  $\delta$  196.67, 158.74, 157.67, 151.61, 133.31, 127.31, 125.24, 122.84, 122.61, 109.14, 64.27, 52.81, 38.58, 35.78, 32.02, 31.32, 28.42 ppm;

HRMS  $m/z$  (ESI): Calculated for  $C_{20}H_{26}NO_3$   $[M + H]^+$  328.1913; found 328.1916.

### 5,9-dimethoxy-3,3-dimethyl-3,4-dihydrophenanthridine-1,6(2H,5H)-dione (3g)

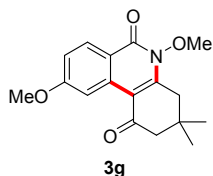

Colourless solid; Eluent (20% ethyl acetate in hexane); Yield 92%; Melting point 124-126 °C;  $^1H$  NMR (400 MHz,  $CDCl_3$ )  $\delta$  8.86 (d,  $J = 2.5$  Hz, 1H), 8.32 (d,  $J = 8.9$  Hz, 1H), 7.07 (dd,  $J = 8.9, 2.6$  Hz, 1H), 4.09 (s, 3H), 3.94 (s, 3H), 3.02 (s, 2H), 2.51 (s, 2H), 1.19 (s, 6H) ppm;  $^{13}C$  NMR (100 MHz,  $CDCl_3$ )  $\delta$  196.64, 164.24, 158.48, 152.41, 135.56, 129.43, 118.75, 117.10, 108.39, 107.23, 64.35, 55.70, 52.73, 38.61, 31.95, 28.39 ppm; HRMS  $m/z$  (ESI): Calculated for  $C_{17}H_{20}NO_4$   $[M + H]^+$  302.1392; found 302.1393.

### 9-fluoro-5-methoxy-3,3-dimethyl-3,4-dihydrophenanthridine-1,6(2H,5H)-dione (3h)

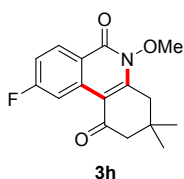

Colourless solid; Eluent (20% ethyl acetate in hexane); Yield 82%; Melting point 112-114 °C;  $^1H$  NMR (400 MHz,  $CDCl_3$ )  $\delta$  9.04 (dd,  $J = 12.2, 2.6$  Hz, 1H), 8.42 (dd,  $J = 8.9, 6.1$  Hz, 1H), 7.20 (ddd,  $J = 9.0, 7.6, 2.6$  Hz, 1H), 4.10 (s, 3H), 3.02 (s, 2H), 2.52 (s, 2H), 1.19 (s, 6H) ppm;  $^{13}C$  NMR (100 MHz,  $CDCl_3$ )  $\delta$  196.06, 167.67, 165.17, 158.18, 152.80, 135.67, 135.55, 130.57, 130.47, 121.76, 121.74, 116.00, 115.76, 112.31, 112.05, 108.24, 108.20, 64.39, 52.43, 38.56, 31.97, 28.39 ppm; HRMS  $m/z$  (ESI): Calculated for  $C_{16}H_{17}FNO_3$   $[M + H]^+$  290.1192; found 290.1193.

### 9-chloro-5-methoxy-3,3-dimethyl-3,4-dihydrophenanthridine-1,6(2H,5H)-dione (3i)

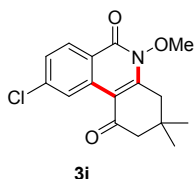

Colourless solid; Eluent (20% ethyl acetate in hexane); Yield 74%; Melting point 138-140 °C;  $^1H$  NMR (400 MHz,  $CDCl_3$ )  $\delta$  9.36 (d,  $J = 2.0$  Hz, 1H), 8.34 (d,  $J = 8.7$  Hz, 1H), 7.45 (dd,  $J = 8.7, 2.1$  Hz, 1H), 4.10 (s, 3H), 3.02 (s, 2H), 2.52 (s, 2H), 1.19 (s, 6H) ppm;  $^{13}C$  NMR (100 MHz,  $CDCl_3$ )  $\delta$  195.99, 158.30, 152.73, 140.91,

134.41, 129.11, 127.85, 125.99, 123.49, 108.04, 64.40, 52.47, 38.58, 31.98, 28.38 ppm; HRMS  $m/z$  (ESI): Calculated for  $C_{16}H_{17}ClNO_3$   $[M + H]^+$  306.0897; found 306.0901.

### 9-bromo-5-methoxy-3,3-dimethyl-3,4-dihydrophenanthridine-1,6(2H,5H)-dione (3j)

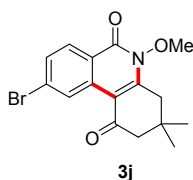

Colourless solid; Eluent (20% ethyl acetate in hexane); Yield 75%; Melting point 140-142 °C;  $^1H$  NMR (400 MHz,  $CDCl_3$ )  $\delta$  9.53 (d,  $J = 1.9$  Hz, 1H), 8.25 (d,  $J = 8.6$  Hz, 1H), 7.61 (dd,  $J = 8.6, 1.9$  Hz, 1H), 4.10 (s, 3H), 3.02 (s, 2H), 2.52 (s, 2H), 1.19 (s, 6H) ppm;  $^{13}C$  NMR (100 MHz,  $CDCl_3$ )  $\delta$  195.95, 158.43, 152.70, 134.51, 130.67, 129.79, 129.10, 129.05, 123.84, 107.95, 64.39, 52.46, 38.57, 31.97, 28.38 ppm; HRMS  $m/z$  (ESI): Calculated for  $C_{16}H_{17}BrNO_3$   $[M + H]^+$  350.0392; found 350.0397.

### 9-iodo-5-methoxy-3,3-dimethyl-3,4-dihydrophenanthridine-1,6(2H,5H)-dione (3k)

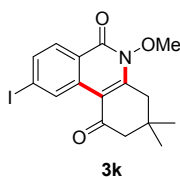

Colourless solid; Yield 75%; Melting point 148-150 °C;  $^1H$  NMR (400 MHz,  $CDCl_3$ )  $\delta$  9.73 (d,  $J = 1.7$  Hz, 1H), 8.08 (d,  $J = 8.5$  Hz, 1H), 7.81 (dd,  $J = 8.5, 1.7$  Hz, 1H), 4.10 (s, 3H), 3.01 (s, 2H), 2.50 (s, 2H), 1.18 (s, 6H) ppm;  $^{13}C$  NMR (100 MHz,  $CDCl_3$ )  $\delta$  195.93, 158.60, 152.54, 136.35, 135.25, 134.30, 128.80, 124.26, 107.75, 102.81, 64.36, 52.46, 38.54, 31.96, 28.36 ppm; HRMS  $m/z$  (ESI): Calculated for  $C_{16}H_{17}INO_3$   $[M + H]^+$  398.0253; found 398.0257.

### 5-methoxy-3,3-dimethyl-9-(trifluoromethyl)-3,4-dihydrophenanthridine-1,6(2H,5H)-dione (3l)

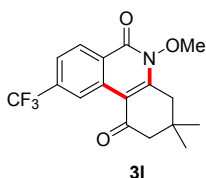

Colourless solid; Eluent (20% ethyl acetate in hexane); Yield 79%; Melting point 124-126 °C;  $^1H$  NMR (400 MHz,  $CDCl_3$ )  $\delta$  9.68 (s, 1H), 8.53 (d,  $J = 8.4$  Hz, 1H), 7.70 (d,  $J = 8.4$  Hz, 1H), 4.12 (s, 3H), 3.05 (s, 2H), 2.54 (s, 2H), 1.20 (s, 6H) ppm;  $^{13}C$  NMR (100 MHz,  $CDCl_3$ )  $\delta$  196.04, 158.08, 152.85, 133.49, 128.47, 127.28, 124.12, 124.08, 124.03, 123.99, 123.37, 123.34, 123.30, 123.27,

108.48, 64.42, 52.44, 38.55, 32.02, 28.37 ppm; HRMS m/z (ESI):  
Calculated for C<sub>17</sub>H<sub>17</sub>F<sub>3</sub>NO<sub>3</sub> [M + H]<sup>+</sup> 340.1161; found 340.1161.

### 5-methoxy-3,3-dimethyl-9-nitro-3,4-dihydrophenanthridine-1,6(2H,5H)-dione (3m)

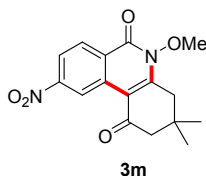

Colourless solid; Yield 38%; Melting point 158-160 °C; <sup>1</sup>H NMR (400 MHz, CDCl<sub>3</sub>) δ 10.22 (d, *J* = 2.2 Hz, 1H), 8.57 (dd, *J* = 8.8, 0.5 Hz, 1H), 8.25 (dd, *J* = 8.8, 2.3 Hz, 1H), 4.14 (s, 3H), 3.06 (s, 2H), 2.57 (s, 2H), 1.21 (s, 6H) ppm; <sup>13</sup>C NMR (100 MHz, CDCl<sub>3</sub>) δ 195.68, 157.69, 153.57, 151.38, 134.05, 129.36, 128.70, 122.37, 120.98, 108.34, 64.52, 52.26, 38.58, 32.05, 28.39 ppm; HRMS m/z (ESI): Calculated for C<sub>16</sub>H<sub>17</sub>N<sub>2</sub>O<sub>5</sub> [M + H]<sup>+</sup> 317.1137; found 317.1138.

### 5-methoxy-3,3-dimethyl-9-phenyl-3,4-dihydrophenanthridine-1,6(2H,5H)-dione (3n)

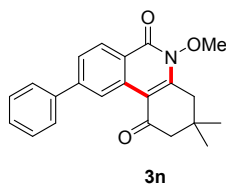

Colourless solid; Eluent (20% ethyl acetate in hexane); Yield 84%; Melting point 162-164 °C; <sup>1</sup>H NMR (400 MHz, CDCl<sub>3</sub>) δ 9.60 (d, *J* = 1.7 Hz, 1H), 8.48 (d, *J* = 8.4 Hz, 1H), 7.75 (td, *J* = 7.7, 7.0, 1.5 Hz, 3H), 7.50 – 7.46 (m, 2H), 7.43 – 7.38 (m, 1H), 4.12 (s, 3H), 3.04 (s, 2H), 2.54 (s, 2H), 1.21 (s, 6H) ppm; <sup>13</sup>C NMR (100 MHz, CDCl<sub>3</sub>) δ 196.43, 158.75, 151.98, 146.48, 140.35, 133.76, 129.05, 128.39, 128.13, 127.79, 126.22, 124.66, 123.97, 109.04, 64.34, 52.70, 38.58, 32.02, 28.42 ppm; HRMS m/z (ESI): Calculated for C<sub>22</sub>H<sub>22</sub>NO<sub>3</sub> [M + H]<sup>+</sup> 348.1600; found 348.1598.

### 6-methoxy-8,8-dimethyl-8,9-dihydrobenzo[*i*]phenanthridine-5,10(6H,7H)-dione (3o)

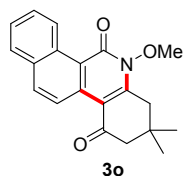

Colourless solid; Eluent (20% ethyl acetate in hexane); Yield 82%; Melting point 158-160 °C; <sup>1</sup>H NMR (400 MHz, CDCl<sub>3</sub>) δ 10.06 (d, *J* = 8.8 Hz, 1H), 9.36 (d, *J* = 9.2 Hz, 1H), 8.11 (d, *J* = 9.2 Hz, 1H), 7.91 (d, *J* = 8.0 Hz, 1H), 7.74 (ddd, *J* = 8.6, 6.9, 1.5 Hz, 1H), 7.63 (td, *J* = 7.5, 6.9, 1.1 Hz, 1H), 4.17 (s, 3H), 3.11 (s, 2H), 2.58 (s, 2H), 1.22 (s, 6H) ppm; <sup>13</sup>C NMR (100 MHz, CDCl<sub>3</sub>) δ 196.34, 158.86, 151.81, 135.94, 134.98, 132.18, 131.52, 128.70,

128.22, 127.29, 126.98, 123.10, 118.88, 108.84, 64.25, 53.11, 38.78, 31.99, 28.46 ppm; HRMS m/z (ESI): Calculated for  $C_{20}H_{20}NO_3$   $[M + H]^+$  322.1443; found 322.1443.

### 5,7-dimethoxy-3,3-dimethyl-3,4-dihydrophenanthridine-1,6(2H,5H)-dione (3p)

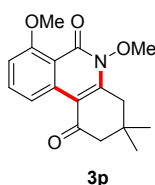

Colourless solid; Eluent (20% ethyl acetate in hexane); Eluent (20% ethyl acetate in hexane); Yield 84%; Melting point 120-122 °C;  $^1H$  NMR (400 MHz,  $CDCl_3$ )  $\delta$  9.18 (d,  $J = 8.5$  Hz, 1H), 7.60 – 7.54 (m, 1H), 7.27 (d,  $J = 7.4$  Hz, 1H), 4.08 (s, 3H), 3.01 (s, 2H), 2.91 (s, 3H), 2.52 (s, 2H), 1.19 (s, 6H) ppm;  $^{13}C$  NMR (100 MHz,  $CDCl_3$ )  $\delta$  196.12, 159.19, 151.56, 141.70, 134.93, 132.94, 130.42, 124.09, 123.53, 108.64, 64.08, 52.86, 38.56, 31.80, 28.35, 24.33 ppm; HRMS m/z (ESI): Calculated for  $C_{17}H_{20}NO_4$   $[M + H]^+$  302.1392; found 302.1394.

### 7-bromo-5-methoxy-3,3-dimethyl-3,4-dihydrophenanthridine-1,6(2H,5H)-dione (3q)

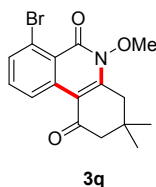

Colourless solid; Eluent (20% ethyl acetate in hexane); Yield 88%; Melting point 130-132 °C;  $^1H$  NMR (400 MHz,  $CDCl_3$ )  $\delta$  9.30 (d,  $J = 7.9$  Hz, 1H), 7.73 (d,  $J = 7.7$  Hz, 1H), 7.44 (t,  $J = 8.1$  Hz, 1H), 4.08 (s, 3H), 2.99 (s, 2H), 2.50 (s, 2H), 1.16 (s, 6H) ppm;  $^{13}C$  NMR (100 MHz,  $CDCl_3$ )  $\delta$  195.74, 156.82, 152.35, 136.35, 134.43, 133.44, 125.71, 122.47, 122.31, 107.89, 64.23, 52.74, 38.58, 31.73, 28.32 ppm; HRMS m/z (ESI): Calculated for  $C_{16}H_{17}BrNO_3$   $[M + H]^+$  350.0392; found 350.0392.

### 7-chloro-5-methoxy-3,3-dimethyl-3,4-dihydrophenanthridine-1,6(2H,5H)-dione (3r)

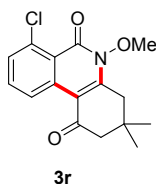

Colourless solid; Eluent (20% ethyl acetate in hexane); Yield 99%; Melting point 118-120 °C;  $^1H$  NMR (400 MHz,  $CDCl_3$ )  $\delta$  9.26 – 9.19 (m, 1H), 7.53 (t,  $J = 9.5$  Hz, 1H), 7.47 (d,  $J = 3.7$  Hz, 1H), 4.08 (s, 3H), 3.00 (s, 2H), 2.50 (s, 2H), 1.17 (s, 6H) ppm;  $^{13}C$  NMR (100 MHz,  $CDCl_3$ )  $\delta$  195.74, 156.67, 152.48, 136.25, 135.02, 133.21, 130.44, 124.95, 121.43, 107.81, 64.17, 52.67, 38.52,

31.68, 28.27 ppm; HRMS  $m/z$  (ESI): Calculated for  $C_{16}H_{17}ClNO_3$   
[ $M + H$ ] $^+$  306.0897; found 306.0898.

**5-methoxy-3,3,8-trimethyl-3,4-dihydrophenanthridine-1,6(2H,5H)-dione / 5-methoxy-3,3,7-trimethyl-3,4-dihydrophenanthridine-1,6(2H,5H)-dione (3s+3s' 1.0 : 0.13)**

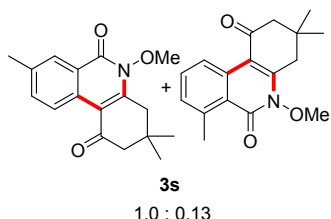

Colourless solid; Eluent (20% ethyl acetate in hexane); Yield 85%; Melting point 156-158 °C;  $^1H$  NMR (400 MHz,  $CDCl_3$ )  $\delta$  9.16 (d,  $J = 8.6$  Hz, 1H), 8.22 (s, 1H), 7.56 (d,  $J = 8.2$  Hz, 1H), 4.09 (s, 3H), 3.01 (s, 2H), 2.51 (s, 2H), 2.47 (s, 3H), 1.18 (s, 6H) ppm;  $^{13}C$  NMR (100 MHz,  $CDCl_3$ )  $\delta$  196.45, 193.95, 158.89, 150.69, 137.38, 136.44, 135.35, 130.93, 127.22, 127.06, 126.98, 126.26, 125.42, 125.17, 109.06, 64.27, 64.24, 52.64, 51.40, 38.45, 38.14, 32.12, 32.05, 29.83, 28.81, 28.42, 24.33, 21.33 ppm; HRMS  $m/z$  (ESI): Calculated for  $C_{17}H_{19}NO_3$  [ $M + H$ ] $^+$  286.1443; found 286.1445.

**5,10-dimethoxy-3,3-dimethyl-3,4-dihydrophenanthridine-1,6(2H,5H)-dione (3t)**

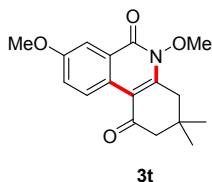

Colourless solid; Eluent (20% ethyl acetate in hexane); Yield 86%; Melting point 116-118 °C;  $^1H$  NMR (400 MHz,  $CDCl_3$ )  $\delta$  8.66 (d,  $J = 8.3$  Hz, 1H), 7.71 (t,  $J = 8.3$  Hz, 1H), 7.01 (d,  $J = 8.1$  Hz, 1H), 4.00 (s, 3H), 2.76 (s, 2H), 2.50 (s, 2H), 1.16 (s, 6H) ppm;  $^{13}C$  NMR (100 MHz,  $CDCl_3$ )  $\delta$  196.95, 168.97, 161.87, 157.29, 136.99, 136.74, 117.76, 110.70, 110.43, 108.75, 56.56, 53.36, 42.79, 32.05, 29.93, 28.39 ppm; HRMS  $m/z$  (ESI): Calculated for  $C_{17}H_{19}NO_4$  [ $M + H$ ] $^+$  302.1392; found 302.1392.

**10-chloro-5-methoxy-3,3-dimethyl-3,4-dihydrophenanthridine-1,6(2H,5H)-dione (3u)**

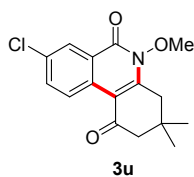

Colourless solid; Eluent (20% ethyl acetate in hexane); Yield 80%; Melting point 118-120 °C;  $^1H$  NMR (400 MHz,  $CDCl_3$ )  $\delta$  8.30 (dd,  $J = 8.0, 1.3$  Hz, 1H), 7.74 (dd,  $J = 7.8, 1.3$  Hz, 1H), 7.43 (t,  $J = 7.9$  Hz, 1H), 4.04 (s, 3H), 2.95 (s, 2H), 2.57 (s, 2H), 1.23 (s, 6H) ppm;  $^{13}C$  NMR (100 MHz,  $CDCl_3$ )  $\delta$  192.80, 157.83, 150.25, 135.59, 131.52, 130.95, 128.38, 127.71, 126.35, 111.66, 64.27,



51.08, 37.84, 32.27, 28.76 ppm; HRMS m/z (ESI): Calculated for  $C_{16}H_{17}ClNO_3$   $[M + H]^+$  306.0897; found 306.0898.

### 5,8,9-trimethoxy-3,3-dimethyl-3,4-dihydrophenanthridine-1,6(2H,5H)-dione (3v)

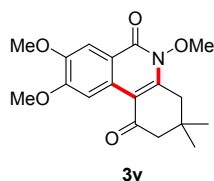

Colourless solid; Eluent (20% ethyl acetate in hexane); Yield 99%; Melting point 200-202 °C;  $^1H$  NMR (400 MHz,  $CDCl_3$ )  $\delta$  8.90 (s, 1H), 7.76 (s, 1H), 4.10 (s, 3H), 4.03 (s, 3H), 4.00 (s, 3H), 3.01 (s, 2H), 2.51 (s, 2H), 1.18 (s, 6H) ppm;  $^{13}C$  NMR (100 MHz,  $CDCl_3$ )  $\delta$  196.81, 158.20, 154.38, 150.30, 149.04, 129.01, 119.29, 108.36, 107.18, 106.97, 64.28, 56.28, 56.19, 52.71, 38.46, 32.04, 28.39 ppm; HRMS m/z (ESI): Calculated for  $C_{18}H_{22}NO_5$   $[M + H]^+$  332.1498; found 332.1499.

### 5-methoxy-3,3-dimethyl-3,4-dihydro-[1,3]dioxolo[4,5-j]phenanthridine-1,6(2H,5H)-dione (3w)

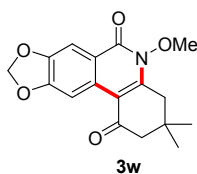

procedure. Colourless solid; Eluent (20% ethyl acetate in hexane); Yield 76%; Melting point 176-178 °C;  $^1H$  NMR (400 MHz,  $CDCl_3$ )  $\delta$  7.99 (d,  $J = 8.5$  Hz, 1H), 6.97 (d,  $J = 8.5$  Hz, 1H), 6.06 (s, 2H), 3.98 (s, 3H), 2.89 (s, 2H), 2.47 (s, 2H), 1.13 (s, 6H) ppm;  $^{13}C$  NMR (100 MHz,  $CDCl_3$ )  $\delta$  193.15, 158.24, 152.19, 150.17, 142.24, 124.10, 120.67, 116.04, 109.36, 108.86, 101.79, 64.30, 51.58, 38.11, 32.58, 28.65 ppm; HRMS m/z (ESI): Calculated for  $C_{17}H_{18}NO_5$   $[M + H]^+$  316.1185; found 316.1185.

### 5-methoxy-3,4-dihydrophenanthridine-1,6(2H,5H)-dione (3x)

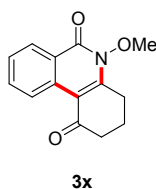

Colourless solid; Eluent (30% ethyl acetate in hexane); Yield 48%; Melting point 122-124 °C;  $^1H$  NMR (400 MHz,  $CDCl_3$ )  $\delta$  9.25 (d,  $J = 8.5$  Hz, 1H), 8.42 (d,  $J = 8.9$  Hz, 1H), 7.74 (ddd,  $J = 8.6, 7.2, 1.5$  Hz, 1H), 7.50 (t,  $J = 8.0$  Hz, 1H), 4.12 (s, 3H), 3.18 (t,  $J = 6.2$  Hz, 2H), 2.68 – 2.63 (m, 2H), 2.24 – 2.16 (m, 2H) ppm;  $^{13}C$  NMR (100 MHz,  $CDCl_3$ )  $\delta$  196.27, 158.69, 153.23, 133.87, 133.55, 127.52, 127.25, 126.56, 125.28, 110.04, 64.31, 38.99, 25.03,

20.78 ppm; HRMS m/z (ESI): Calculated for C<sub>14</sub>H<sub>14</sub>NO<sub>3</sub> [M+H]<sup>+</sup> 244.0974; found 244.0975.

### 5-methoxy-3-phenyl-3,4-dihydrophenanthridine-1,6(2H,5H)-dione (3y)

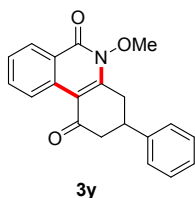

Colourless solid; Eluent (25% ethyl acetate in hexane); Yield 75%; Melting point 178-180 °C; <sup>1</sup>H NMR (400 MHz, CDCl<sub>3</sub>) δ 9.30 (d, *J* = 8.4 Hz, 1H), 8.44 (d, *J* = 7.2 Hz, 1H), 7.76 (t, *J* = 7.2 Hz, 1H), 7.53 (t, *J* = 7.5 Hz, 1H), 7.44 – 7.39 (m, 2H), 7.34 (d, *J* = 8.1 Hz, 3H), 4.10 (s, 3H), 3.65 – 3.49 (m, 2H), 3.15 (dd, *J* = 17.7, 11.1 Hz, 1H), 2.95 – 2.89 (m, 2H) ppm; <sup>13</sup>C NMR (100 MHz, CDCl<sub>3</sub>) δ 195.56, 158.72, 152.38, 142.09, 133.99, 133.34, 129.20, 127.68, 127.60, 127.43, 126.85, 126.47, 125.28, 109.72, 64.42, 45.63, 38.72, 32.67 ppm; HRMS m/z (ESI): Calculated for C<sub>20</sub>H<sub>18</sub>NO<sub>3</sub> [M+H]<sup>+</sup> 320.1287; found 320.1286.

### 5-methoxy-3-(p-tolyl)-3,4-dihydrophenanthridine-1,6(2H,5H)-dione (3z)

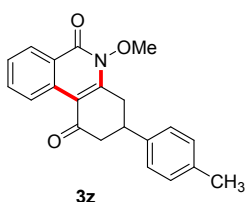

Viscous liquid; Eluent (25% ethyl acetate in hexane); Yield 65%; <sup>1</sup>H NMR (400 MHz, CDCl<sub>3</sub>) δ 9.32 – 9.26 (m, 1H), 8.42 (d, *J* = 8.0 Hz, 1H), 7.75 (t, *J* = 7.8 Hz, 1H), 7.52 (t, *J* = 7.6 Hz, 1H), 7.24 – 7.20 (m, 4H), 4.09 (s, 3H), 3.60 – 3.45 (m, 2H), 3.12 (dd, *J* = 17.8, 11.1 Hz, 1H), 2.93 – 2.86 (m, 2H), 2.37 (s, 3H) ppm; <sup>13</sup>C NMR (100 MHz, CDCl<sub>3</sub>) δ 195.70, 158.70, 152.45, 139.13, 137.34, 133.93, 133.33, 129.79, 127.54, 127.36, 126.69, 126.42, 125.22, 109.67, 64.37, 45.69, 38.30, 32.77, 21.15 ppm; HRMS m/z (ESI): Calculated for C<sub>21</sub>H<sub>20</sub>NO<sub>3</sub> [M+H]<sup>+</sup> 334.1443; found 334.1444.

### 5-methoxy-3-(4-methoxyphenyl)-3,4-dihydrophenanthridine-1,6(2H,5H)-dione (3aa)

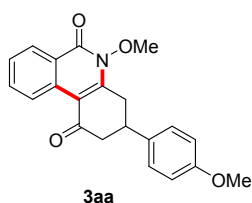

Colourless solid; Eluent (25% ethyl acetate in hexane); Yield 70%; Melting point 108-110 °C; <sup>1</sup>H NMR (400 MHz, CDCl<sub>3</sub>) δ 9.31 (d, *J* = 8.5 Hz, 1H), 8.44 (d, *J* = 8.1 Hz, 1H), 7.77 (t, *J* = 7.8 Hz, 1H), 7.54 (t, *J* = 7.6 Hz, 1H), 7.29 – 7.25 (m, 2H), 6.97 – 6.93 (m, 2H),

4.12 (s, 3H), 3.84 (s, 3H), 3.61 – 3.45 (m, 2H), 3.12 (dd,  $J = 17.8$ , 11.2 Hz, 1H), 2.96 – 2.85 (m, 2H) ppm;  $^{13}\text{C}$  NMR (101 MHz,  $\text{CDCl}_3$ )  $\delta$  195.69, 159.00, 158.68, 152.43, 134.21, 133.92, 133.32, 127.82, 127.54, 127.35, 126.41, 125.22, 114.49, 109.66, 64.37, 55.47, 45.87, 37.92, 32.91 ppm; HRMS  $m/z$  (ESI): Calculated for  $\text{C}_{21}\text{H}_{20}\text{NO}_4$   $[\text{M}+\text{H}]^+$  350.1392; found 350.1393.

### 3-(3,5-dimethoxyphenyl)-5-methoxy-3,4-dihydrophenanthridine-1,6(2H,5H)-dione (3ab)

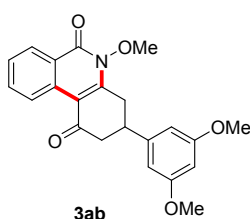

Viscous liquid; Eluent (30% ethyl acetate in hexane); Yield 72%;  $^1\text{H}$  NMR (400 MHz,  $\text{CDCl}_3$ )  $\delta$  9.20 (d,  $J = 8.5$  Hz, 1H), 8.34 (d,  $J = 8.0$  Hz, 1H), 7.67 (t,  $J = 7.7$  Hz, 1H), 7.44 (t,  $J = 7.5$  Hz, 1H), 6.40 (d,  $J = 2.0$  Hz, 2H), 6.34 (d,  $J = 1.9$  Hz, 1H), 4.02 (s, 3H), 3.74 (s, 6H), 3.55 – 3.33 (m, 2H), 3.04 (dd,  $J = 17.9$ , 11.5 Hz, 1H), 2.88 – 2.75 (m, 2H) ppm;  $^{13}\text{C}$  NMR (100 MHz,  $\text{CDCl}_3$ )  $\delta$  195.46, 161.39, 158.67, 152.35, 144.52, 133.95, 133.30, 127.56, 127.39, 126.41, 125.24, 109.63, 105.21, 98.85, 64.41, 55.52, 45.56, 38.91, 32.51 ppm; HRMS  $m/z$  (ESI): Calculated for  $\text{C}_{22}\text{H}_{22}\text{NO}_5$   $[\text{M}+\text{H}]^+$  380.1498; found 380.1498.

### 5-methoxy-3-(3,4,5-trimethoxyphenyl)-3,4-dihydrophenanthridine-1,6(2H,5H)-dione (3ac)

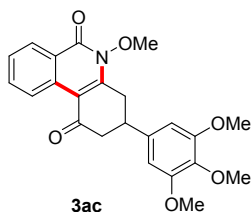

Colourless solid; Eluent (30% ethyl acetate in hexane); Yield 55%; Melting point 132-134 °C;  $^1\text{H}$  NMR (400 MHz,  $\text{CDCl}_3$ )  $\delta$  9.29 (d,  $J = 8.5$  Hz, 1H), 8.44 (d,  $J = 8.1$  Hz, 1H), 7.76 (t,  $J = 7.8$  Hz, 1H), 7.53 (t,  $J = 7.6$  Hz, 1H), 6.53 (s, 2H), 4.11 (s, 3H), 3.89 (s, 6H), 3.86 (s, 3H), 3.59 (dt,  $J = 18.0$ , 2.7 Hz, 1H), 3.50 – 3.42 (m, 1H), 3.17 – 3.09 (m, 1H), 2.96 – 2.87 (m, 2H) ppm;  $^{13}\text{C}$  NMR (100 MHz,  $\text{CDCl}_3$ )  $\delta$  195.45, 158.72, 153.76, 152.24, 137.85, 137.57, 134.04, 133.29, 127.62, 127.49, 126.44, 125.25, 109.71, 104.01, 64.46, 61.03, 56.42, 45.73, 39.13, 32.89 ppm; HRMS  $m/z$  (ESI): Calculated for  $\text{C}_{23}\text{H}_{24}\text{NO}_6$   $[\text{M}+\text{H}]^+$  410.1604; found 410.1602.

### 3-(4-fluorophenyl)-5-methoxy-3,4-dihydrophenanthridine-1,6(2H,5H)-dione (3ad)

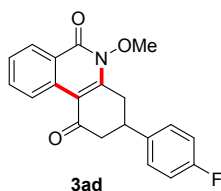

Colourless solid; Eluent (25% ethyl acetate in hexane); Yield 60%; Melting point 138-140 °C;  $^1\text{H}$  NMR (400 MHz,  $\text{CDCl}_3$ )  $\delta$  9.20 (d,  $J = 8.4$  Hz, 1H), 8.34 (d,  $J = 8.0$  Hz, 1H), 7.68 (t,  $J = 7.8$  Hz, 1H), 7.45 (t,  $J = 7.2$  Hz, 1H), 7.26 – 7.19 (m, 2H), 7.02 (t,  $J = 8.6$  Hz, 2H), 4.03 (s, 3H), 3.55 – 3.39 (m, 2H), 3.03 (dd,  $J = 17.5, 10.8$  Hz, 1H), 2.87 – 2.74 (m, 2H) ppm;  $^{13}\text{C}$  NMR (100 MHz,  $\text{CDCl}_3$ )  $\delta$  195.22, 163.35, 160.91, 158.64, 152.16, 137.84, 137.80, 133.98, 133.24, 128.41, 128.33, 127.57, 127.46, 126.41, 125.24, 116.12, 115.91, 109.66, 64.41, 45.71, 38.00, 32.71 ppm; HRMS  $m/z$  (ESI): Calculated for  $\text{C}_{20}\text{H}_{17}\text{FNO}_3$   $[\text{M}+\text{H}]^+$  338.1192; found 338.1197.

### 3-(4-chlorophenyl)-5-methoxy-3,4-dihydrophenanthridine-1,6(2H,5H)-dione (3ae)

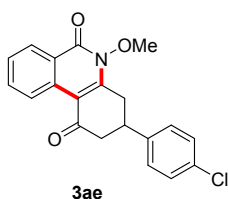

Colourless solid; Eluent (25% ethyl acetate in hexane); Yield 54%; Melting point 152-154 °C;  $^1\text{H}$  NMR (400 MHz,  $\text{CDCl}_3$ )  $\delta$  9.22 (d,  $J = 8.4$  Hz, 1H), 8.37 (d,  $J = 8.1$  Hz, 1H), 7.70 (ddd,  $J = 8.6, 7.1, 1.6$  Hz, 1H), 7.47 (ddd,  $J = 8.1, 7.2, 1.1$  Hz, 1H), 7.33 – 7.29 (m, 2H), 7.22 – 7.19 (m, 2H), 4.04 (s, 3H), 3.54 – 3.41 (m, 2H), 3.04 (dd,  $J = 17.5, 10.8$  Hz, 1H), 2.88 – 2.79 (m, 2H) ppm;  $^{13}\text{C}$  NMR (100 MHz,  $\text{CDCl}_3$ )  $\delta$  195.09, 158.69, 152.05, 140.50, 134.06, 133.50, 133.25, 129.36, 128.23, 127.64, 127.54, 126.48, 125.31, 109.73, 64.47, 45.49, 38.15, 32.52 ppm; HRMS  $m/z$  (ESI): Calculated for  $\text{C}_{20}\text{H}_{16}\text{ClNO}_3$   $[\text{M}+\text{H}]^+$  354.0897; found 354.0895.

### 3-(4-bromophenyl)-5-methoxy-3,4-dihydrophenanthridine-1,6(2H,5H)-dione (3af)

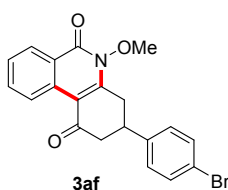

Colourless solid; Eluent (25% ethyl acetate in hexane); Yield 56%; Melting point 164-166 °C;  $^1\text{H}$  NMR (400 MHz,  $\text{CDCl}_3$ )  $\delta$  9.29 (d,  $J = 8.4$  Hz, 1H), 8.44 (dd,  $J = 8.3, 1.4$  Hz, 1H), 7.80 – 7.75 (m, 1H), 7.55 – 7.51 (m, 3H), 7.23 – 7.21 (m, 1H), 4.11 (s, 3H), 3.61 – 3.47 (m, 2H), 3.11 (dd,  $J = 17.7, 11.0$  Hz, 1H), 2.95 – 2.86 (m, 2H)

ppm;  $^{13}\text{C}$  NMR (100 MHz,  $\text{CDCl}_3$ )  $\delta$  195.06, 159.18, 158.70, 152.02, 141.02, 134.07, 132.33, 128.59, 127.65, 127.56, 126.48, 125.32, 121.53, 109.74, 64.48, 45.42, 38.22, 32.46 ppm; HRMS  $m/z$  (ESI): Calculated for  $\text{C}_{20}\text{H}_{17}\text{BrNO}_3$   $[\text{M}+\text{H}]^+$  398.0392; found 398.1230.

### 3-(2,6-dichlorophenyl)-5-methoxy-3,4-dihydrophenanthridine-1,6(2H,5H)-dione (3ag)

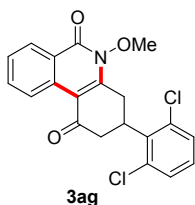

Viscous sticky liquid; Yield 78%;  $^1\text{H}$  NMR (400 MHz,  $\text{CDCl}_3$ )  $\delta$  9.28 (d,  $J = 8.3$  Hz, 1H), 8.44 (dd,  $J = 8.1, 1.1$  Hz, 1H), 7.77 (ddd,  $J = 8.6, 7.1, 1.6$  Hz, 1H), 7.53 (td,  $J = 7.7, 7.3, 1.1$  Hz, 1H), 7.38 (s, 2H), 7.20 (t,  $J = 8.1$  Hz, 1H), 4.60 – 4.50 (m, 1H), 4.12 (s, 3H), 3.97 (dd,  $J = 18.3, 12.5$  Hz, 1H), 3.79 (dd,  $J = 16.3, 14.6$  Hz, 1H), 3.36 (ddd,  $J = 18.3, 5.0, 1.6$  Hz, 1H), 2.70 (ddd,  $J = 16.3, 4.2, 1.6$  Hz, 1H) ppm;  $^{13}\text{C}$  NMR (100 MHz,  $\text{CDCl}_3$ )  $\delta$  195.43, 158.63, 152.66, 135.45, 133.96, 133.44, 129.29, 127.59, 127.41, 126.55, 125.35, 109.56, 64.44, 40.77, 35.27, 27.21 ppm; HRMS  $m/z$  (ESI): Calculated for  $\text{C}_{20}\text{H}_{16}\text{Cl}_2\text{NO}_3$   $[\text{M}+\text{H}]^+$  388.0507; found 388.0506.

## 26. $^1\text{H}$ and $^{13}\text{C}$ NMR spectral data for compounds 3a'

### 3,3-dimethyl-3,4-dihydro-1H-benzo[*c*]chromene-1,6(2H)-dione (3a')

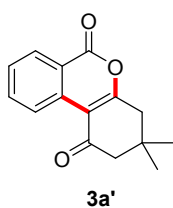

Colourless solid; Eluent (10% ethyl acetate in hexane);  $^1\text{H}$  NMR (400 MHz,  $\text{CDCl}_3$ )  $\delta$  9.05 (dd,  $J = 8.4, 1.1$  Hz, 1H), 8.29 (d,  $J = 7.9$  Hz, 1H), 7.80 (ddd,  $J = 8.6, 7.3, 1.6$  Hz, 1H), 7.54 (ddd,  $J = 8.3, 7.3, 1.2$  Hz, 1H), 2.80 (s, 2H), 2.53 (s, 2H), 1.18 (s, 6H) ppm;  $^{13}\text{C}$  NMR (100 MHz,  $\text{CDCl}_3$ )  $\delta$  197.05, 168.10, 160.87, 135.79, 134.03, 129.75, 128.55, 126.01, 119.97, 110.77, 77.48, 77.16, 76.84, 53.03, 42.73, 32.10, 28.30 ppm.

27.  $^1\text{H}$  and  $^{13}\text{C}$  NMR spectral data for compounds 4a

3,3-dimethyl-3,4-dihydrophenanthridine-1,6(2H,5H)-dione (4a)

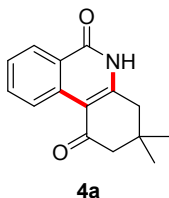

colourless solid; Eluent (40% ethyl acetate in hexane); Yield 95%;  $^1\text{H}$  NMR (400 MHz, DMSO)  $\delta$  11.89 (s, 1H), 9.23 – 9.17 (m, 1H), 8.21 (dd,  $J$  = 8.1, 1.6 Hz, 1H), 7.76 (ddd,  $J$  = 8.5, 7.1, 1.6 Hz, 1H), 7.51 (ddd,  $J$  = 8.1, 7.1, 1.2 Hz, 1H), 2.80 (s, 2H), 2.45 (s, 2H), 1.06 (s, 6H) ppm;  $^{13}\text{C}$  NMR (100 MHz, DMSO)  $\delta$  196.49, 162.48, 153.85, 135.36, 133.87, 127.12, 126.84, 125.80, 124.71, 107.77, 52.94, 41.49, 32.46, 28.04 ppm; HRMS  $m/z$  (ESI): Calculated for  $\text{C}_{15}\text{H}_{16}\text{NO}_2$   $[\text{M}+\text{H}]^+$  242.1181; found 242.1185.

28.  $^1\text{H}$ ,  $^{13}\text{C}$  NMR and HRMS spectral data for compounds (6a-e)

9,9-dimethyl-4,5-diphenyl-9,10-dihydropyrano[2,3,4-g]phenanthridin-11(8H)-one (6a)

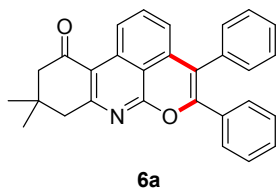

Yellow solid; Eluent (20% ethyl acetate in hexane); Yield 85%; Melting point: 204-206 °C;  $^1\text{H}$  NMR (400 MHz,  $\text{CDCl}_3$ )  $\delta$  9.17 (dd,  $J$  = 8.7, 0.9 Hz, 1H), 7.69 (dd,  $J$  = 8.6, 7.6 Hz, 1H), 7.45 – 7.36 (m, 5H), 7.29 – 7.17 (m, 6H), 6.91 (dd,  $J$  = 7.6, 0.9 Hz, 1H), 3.07 (s, 2H), 2.62 (s, 2H), 1.17 (s, 6H) ppm;  $^{13}\text{C}$  NMR (100 MHz,  $\text{CDCl}_3$ )  $\delta$  199.13, 162.89, 161.80, 150.11, 136.91, 135.00, 134.33, 134.22, 132.79, 130.90, 129.43, 129.37, 129.18, 128.35, 127.97, 122.72, 118.94, 118.84, 116.27, 115.75, 54.01, 47.92, 32.69, 28.30 ppm; HRMS  $m/z$  (ESI): Calculated for  $\text{C}_{29}\text{H}_{24}\text{NO}_2$   $[\text{M}+\text{H}]^+$  417.1729; found 418.1807.

9,9-dimethyl-4,5-di-p-tolyl-9,10-dihydropyrano[2,3,4-g]phenanthridin-11(8H)-one (6b)

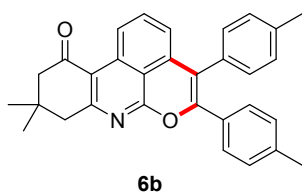

Yellow solid; Eluent (20% ethyl acetate in hexane); Yield 82%; Melting point 210-212 °C;  $^1\text{H}$  NMR (400 MHz,  $\text{CDCl}_3$ )  $\delta$  9.15 (d,  $J$  = 8.6 Hz, 1H), 7.71 – 7.65 (m, 1H), 7.32 – 7.27 (m, 2H), 7.24 (d,  $J$  = 7.8 Hz, 2H), 7.17 – 7.13 (m, 2H), 7.01 (d,  $J$  = 8.1 Hz, 2H), 6.90 (d,  $J$  = 8.2 Hz, 1H), 3.07 (s, 2H), 2.61 (s, 2H), 2.41 (s, 3H), 2.30 (s,

3H), 1.16 (s, 6H) ppm;  $^{13}\text{C}$  NMR (100 MHz,  $\text{CDCl}_3$ )  $\delta$  199.10, 162.88, 161.94, 150.15, 139.22, 138.04, 136.91, 134.99, 134.68, 131.47, 130.72, 130.19, 130.04, 129.24, 128.71, 122.45, 118.86, 118.29, 116.22, 115.74, 54.05, 47.97, 32.69, 28.32, 21.50, 21.45 ppm; HRMS  $m/z$  (ESI): Calculated for  $\text{C}_{31}\text{H}_{28}\text{NO}_2$   $[\text{M}+\text{H}]^+$  445.2042; found 446.2102.

**4,5-bis(4-methoxyphenyl)-9,9-dimethyl-9,10-dihydropyrano[2,3,4-gh]phenanthridin-11(8H)-one (6c)**

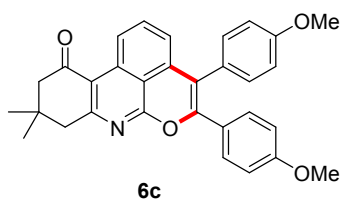

Yellow solid; Eluent (20% ethyl acetate in hexane); Yield 75%; Melting point: 216-218 °C;  $^1\text{H}$  NMR (400 MHz,  $\text{CDCl}_3$ )  $\delta$  9.13 (d,  $J$  = 8.6 Hz, 1H), 7.71 – 7.64 (m, 1H), 7.37 – 7.31 (m, 2H), 7.20 – 7.16 (m, 2H), 7.00 – 6.95 (m, 2H), 6.90 (d,  $J$  = 7.6 Hz, 1H), 6.75 – 6.70 (m, 2H), 3.86 (s, 3H), 3.77 (s, 3H), 3.06 (s, 2H), 2.61 (s, 2H), 1.16 (s, 6H) ppm;  $^{13}\text{C}$  NMR (100 MHz,  $\text{CDCl}_3$ )  $\delta$  199.05, 162.85, 161.88, 160.09, 159.50, 150.02, 136.87, 134.98, 134.87, 132.04, 130.80, 126.66, 125.33, 122.26, 118.61, 117.31, 116.17, 115.61, 114.98, 113.43, 55.41, 55.34, 54.01, 47.94, 32.65, 28.29 ppm; HRMS  $m/z$  (ESI): Calculated for  $\text{C}_{31}\text{H}_{28}\text{NO}_4$   $[\text{M}+\text{H}]^+$  478.2018; found 478.2016.

**4,5-bis(4-chlorophenyl)-9,9-dimethyl-9,10-dihydropyrano[2,3,4gh]phenanthridin-11(8H)-one (6d)**

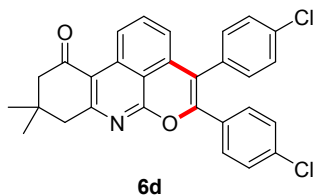

Yellow solid; Eluent (20% ethyl acetate in hexane); Yield 78%; Melting point: 220-222 °C;  $^1\text{H}$  NMR (400 MHz,  $\text{CDCl}_3$ )  $\delta$  9.19 (dd,  $J$  = 8.7, 0.9 Hz, 1H), 7.70 (dd,  $J$  = 8.6, 7.5 Hz, 1H), 7.46 – 7.41 (m, 2H), 7.33 – 7.29 (m, 2H), 7.24 – 7.18 (m, 4H), 6.87 (dd,  $J$  = 7.6, 0.9 Hz, 1H), 3.06 (s, 2H), 2.62 (s, 2H), 1.16 (s, 6H) ppm;  $^{13}\text{C}$  NMR (100 MHz,  $\text{CDCl}_3$ )  $\delta$  199.09, 162.82, 161.39, 149.19, 136.97, 135.51, 135.01, 134.65, 133.49, 132.51, 132.22, 130.97, 130.60, 129.98, 128.49, 123.21, 118.82, 118.05, 116.45, 115.64, 77.48,

77.16, 76.84, 53.96, 47.88, 32.69, 28.28 ppm; HRMS m/z (ESI):  
Calculated for C<sub>29</sub>H<sub>22</sub>Cl<sub>2</sub>NO<sub>2</sub> [M+H]<sup>+</sup> 486.1028; found 486.1030.

**4,5-bis(4-bromophenyl)-9,9-dimethyl-9,10-dihydropyrano[2,3,4-gh]phenanthridin-11(8H)-one (6e)**

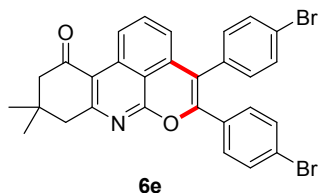

Yellow solid; Eluent (20% ethyl acetate in hexane); Yield 65%;  
Melting point: 224-226 °C; <sup>1</sup>H NMR (400 MHz, CDCl<sub>3</sub>) δ 9.19 (d, *J* = 8.6 Hz, 1H), 7.73 – 7.68 (m, 1H), 7.60 – 7.57 (m, 1H), 7.41 – 7.34 (m, 2H), 7.28 – 7.19 (m, 3H), 7.18 – 7.11 (m, 2H), 6.87 (dd, *J* = 7.6, 0.9 Hz, 1H), 3.06 (s, 2H), 2.62 (s, 2H), 1.16 (s, 6H) ppm; <sup>13</sup>C NMR (100 MHz, CDCl<sub>3</sub>) δ 199.09, 162.82, 161.38, 149.18, 136.98, 135.01, 132.96, 132.50, 132.21, 131.46, 131.46, 130.81, 130.61, 130.00, 128.51, 123.93, 123.25, 122.82, 118.85, 118.10, 116.47, 115.64, 53.97, 47.89, 32.69, 28.28 ppm; HRMS m/z (ESI):  
Calculated for C<sub>29</sub>H<sub>21</sub>Br<sub>2</sub>NO<sub>2</sub> [M+NH<sub>4</sub>]<sup>+</sup> 591.0283; found 591.9954.

**4,9,9-trimethyl-5-phenyl-9,10-dihydropyrano[2,3,4-gh]phenanthridin-11(8H)-one (6f)**

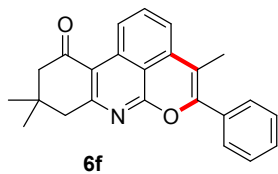

Yellow solid; Eluent (15% ethyl acetate in hexane); Yield 70%;  
Melting point: 150-152 °C; <sup>1</sup>H NMR (400 MHz, CDCl<sub>3</sub>) δ 9.23 (d, *J* = 8.6 Hz, 1H), 7.90 – 7.84 (m, 1H), 7.67 – 7.63 (m, 2H), 7.48 – 7.46 (m, 3H), 7.32 (d, *J* = 7.4 Hz, 1H), 3.04 (s, 2H), 2.61 (s, 2H), 2.24 (s, 3H), 1.15 (s, 6H).ppm; <sup>13</sup>C NMR (100 MHz, CDCl<sub>3</sub>) δ 199.16, 162.81, 161.72, 150.44, 136.99, 135.09, 134.00, 133.20, 129.71, 129.60, 128.40, 122.59, 116.82, 116.12, 111.35, 54.04, 47.94, 32.69, 28.31, 13.82 ppm.

**4,5-diethyl-9,9-dimethyl-9,10-dihydropyrano[2,3,4-gh]phenanthridin-11(8H)-one (6g)**

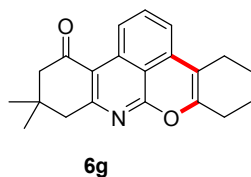

Viscous yellowish stick liquid; Eluent (10% ethyl acetate in hexane); Yield 65%; <sup>1</sup>H NMR (400 MHz, CDCl<sub>3</sub>) δ 9.11 (d, *J* = 8.7 Hz, 1H), 7.78 (t, *J* = 8.1 Hz, 1H), 7.24 – 7.18 (m, 1H), 2.99 (s, 2H), 2.63 (dt, *J* = 13.0, 7.0 Hz, 4H), 2.57 (s, 2H), 1.32 (t, *J* = 7.5 Hz, 3H),



1.19 (t,  $J = 7.5$  Hz, 3H), 1.12 (s, 6H) ppm;  $^{13}\text{C}$  NMR (100 MHz,  $\text{CDCl}_3$ )  $\delta$  198.99, 162.58, 161.85, 154.13, 137.22, 135.00, 132.91, 121.65, 115.91, 115.90, 115.76, 115.10, 53.99, 47.88, 32.61, 28.27, 24.08, 19.60, 13.21, 12.73 ppm.

#### 6H,11H-isochromeno[4,3-c] chromene-6,11-dione (7a')

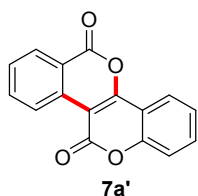

white solid; Eluent (30% ethyl acetate in hexane); Yield 75%;  $^1\text{H}$  NMR (400 MHz,  $\text{CDCl}_3$ )  $\delta$  9.21 (d,  $J = 8.3$  Hz, 1H), 8.42 (dd,  $J = 7.9$ , 1.0 Hz, 1H), 8.19 (dd,  $J = 8.2$ , 1.6 Hz, 1H), 7.92 (ddd,  $J = 8.3$ , 7.3, 1.5 Hz, 1H), 7.71 – 7.64 (m, 2H), 7.46 – 7.42 (m, 2H) ppm;  $^{13}\text{C}$  NMR (100 MHz,  $\text{CDCl}_3$ )  $\delta$  159.31, 159.13, 157.88, 152.73, 136.31, 133.89, 133.31, 130.41, 130.02, 129.65, 126.68, 125.12, 123.83, 120.51, 116.94, 113.64 ppm; HRMS  $m/z$  (ESI): Calculated for  $\text{C}_{16}\text{H}_9\text{O}_4$   $[\text{M}+\text{H}]^+$  265.0501; found 265.1200.

#### 5-methoxy-3,3-dimethyl-3,4-dihydrophenanthridine-1,6(2H,5H)-dione-7,8,9,10-d<sub>4</sub> (3a-d<sub>4</sub>)

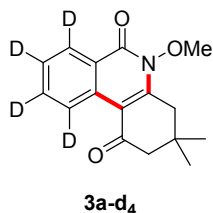

white solid; Eluent (25% ethyl acetate in hexane); yield 72 %; Melting point: 108-110 °C;  $^1\text{H}$  NMR (400 MHz,  $\text{CDCl}_3$ )  $\delta$  4.11 (s, 3H), 3.04 (s, 2H), 2.53 (s, 2H), 1.20 (s, 6H) ppm;  $^{13}\text{C}$  NMR (100 MHz,  $\text{CDCl}_3$ )  $\delta$  196.39, 158.84, 151.57, 133.20, 125.08, 108.99, 64.28, 52.63, 38.50, 32.01, 28.40 ppm.

## 29. NMR and HRMS spectrum of synthesized compounds

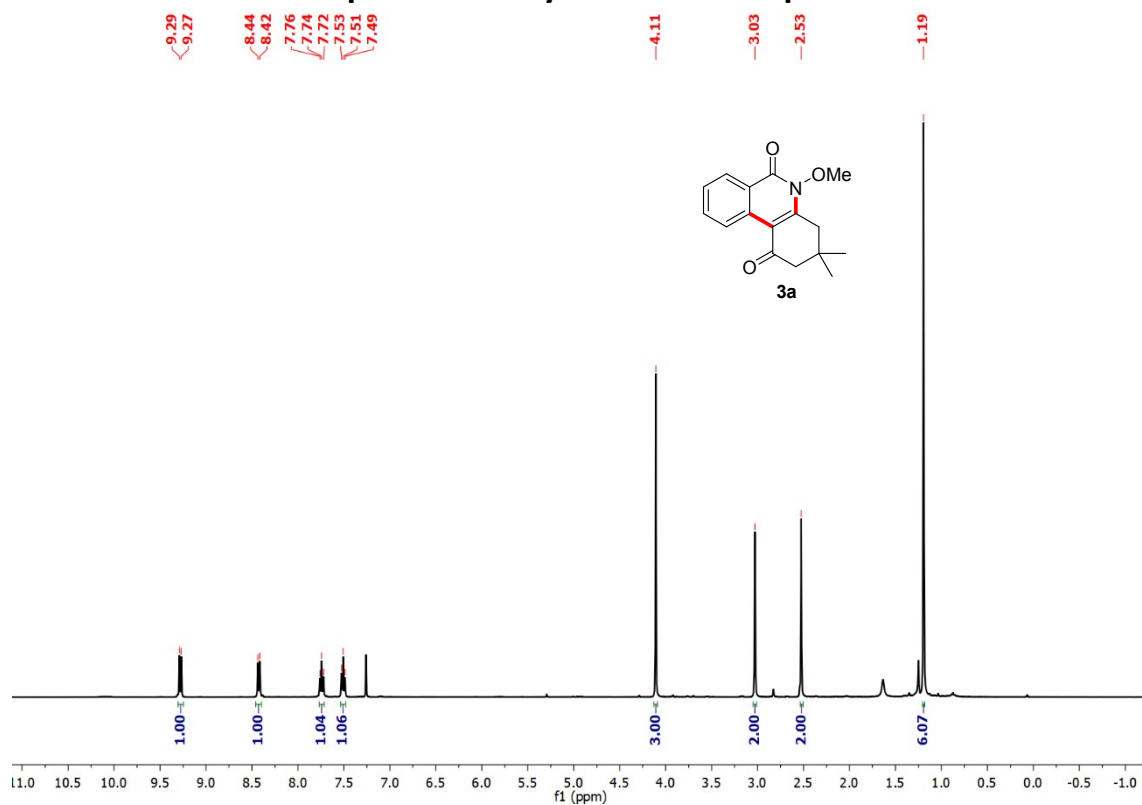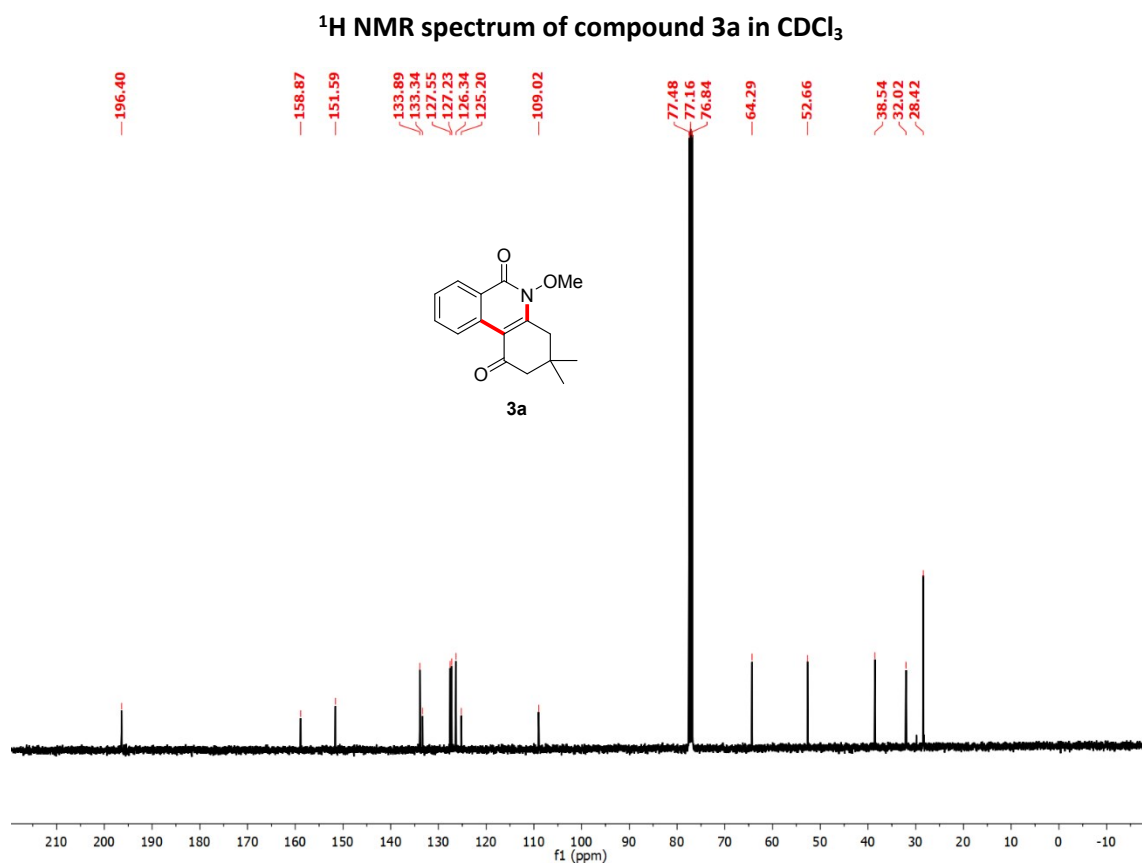

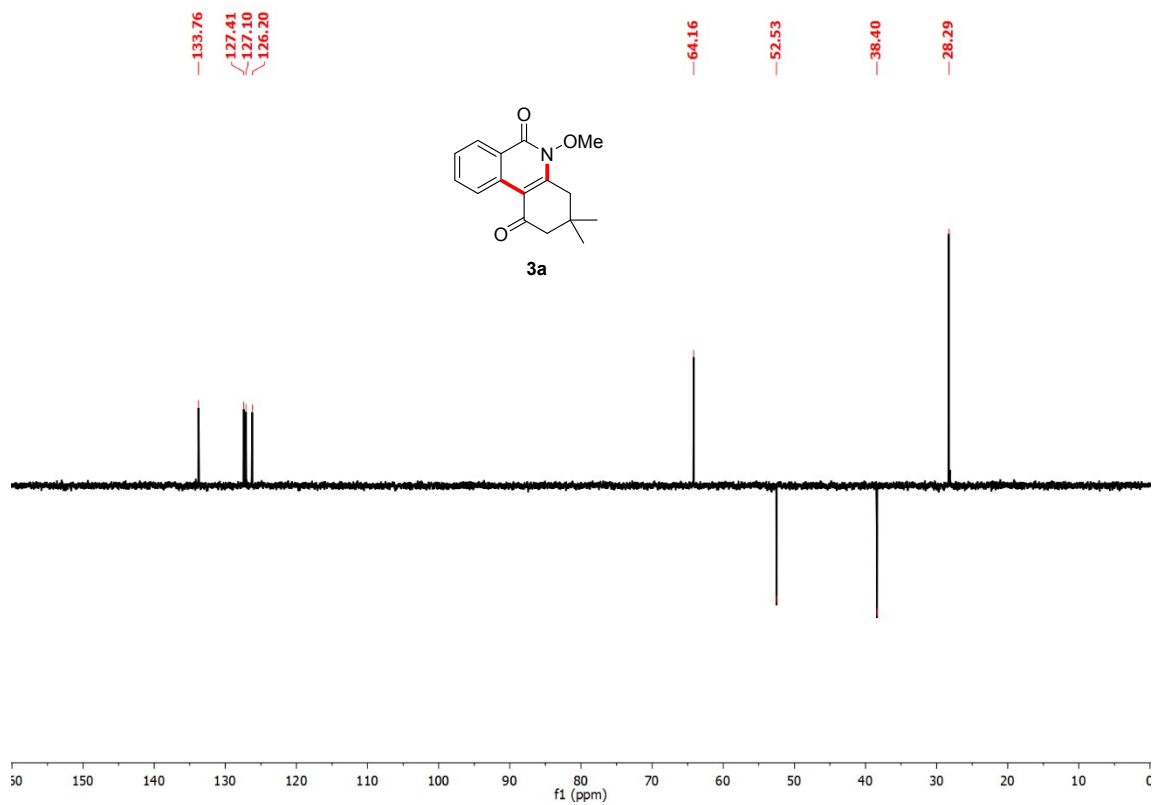

DEPT-135 NMR spectrum of compound 3a in CDCl<sub>3</sub>

## UOH -SCHOOL OF CHEMISTRY -HRMS

### Analysis Info

Analysis Name D:\Data\2018\PROF RN\DEC\NB-200r.d  
 Method tune\_low\_Pos.m  
 Sample Name NB-200-MEOH  
 Comment

Acquisition Date 12/31/2018 11:14:26 AM

Operator UOH-Chemistry  
 Instrument maXis 10138

### Acquisition Parameter

|             |            |                       |           |                  |           |
|-------------|------------|-----------------------|-----------|------------------|-----------|
| Source Type | ESI        | Ion Polarity          | Positive  | Set Nebulizer    | 0.3 Bar   |
| Focus       | Not active | Set Capillary         | 4200 V    | Set Dry Heater   | 180 °C    |
| Scan Begin  | 50 m/z     | Set End Plate Offset  | -500 V    | Set Dry Gas      | 6.0 l/min |
| Scan End    | 1500 m/z   | Set Collision Cell RF | 350.0 Vpp | Set Divert Valve | Waste     |

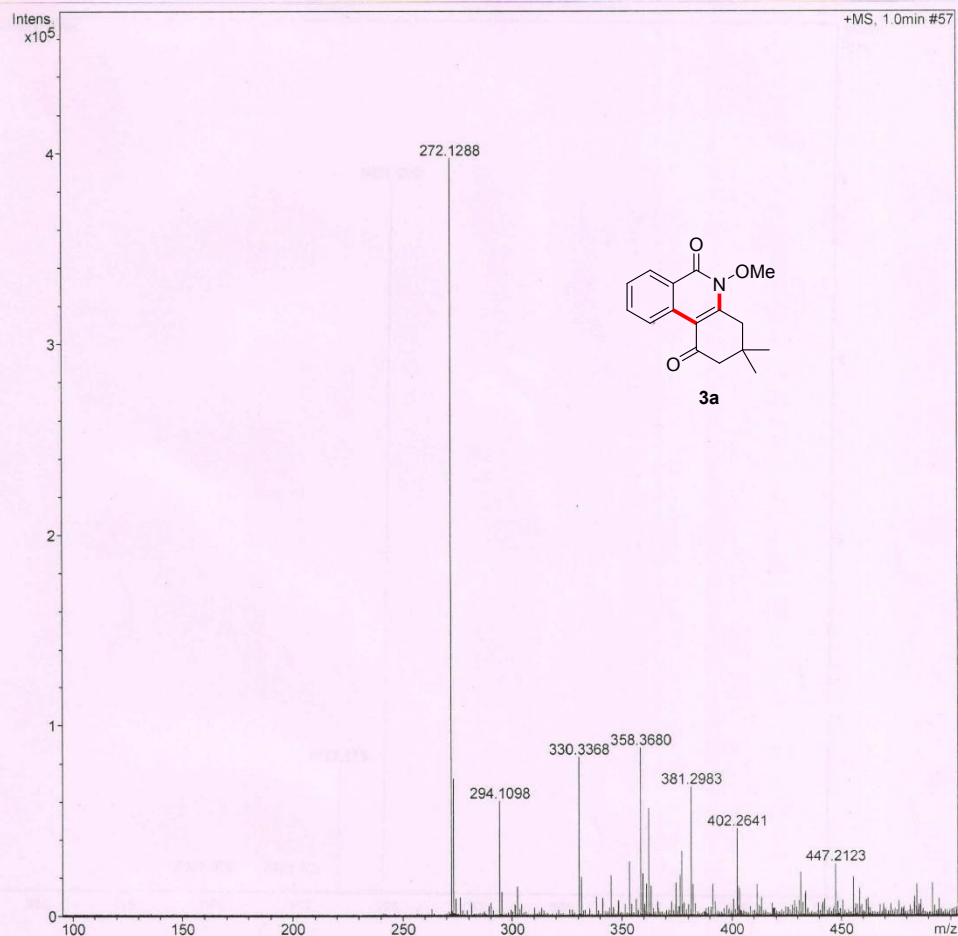

**HRMS spectrum of compound 3a**

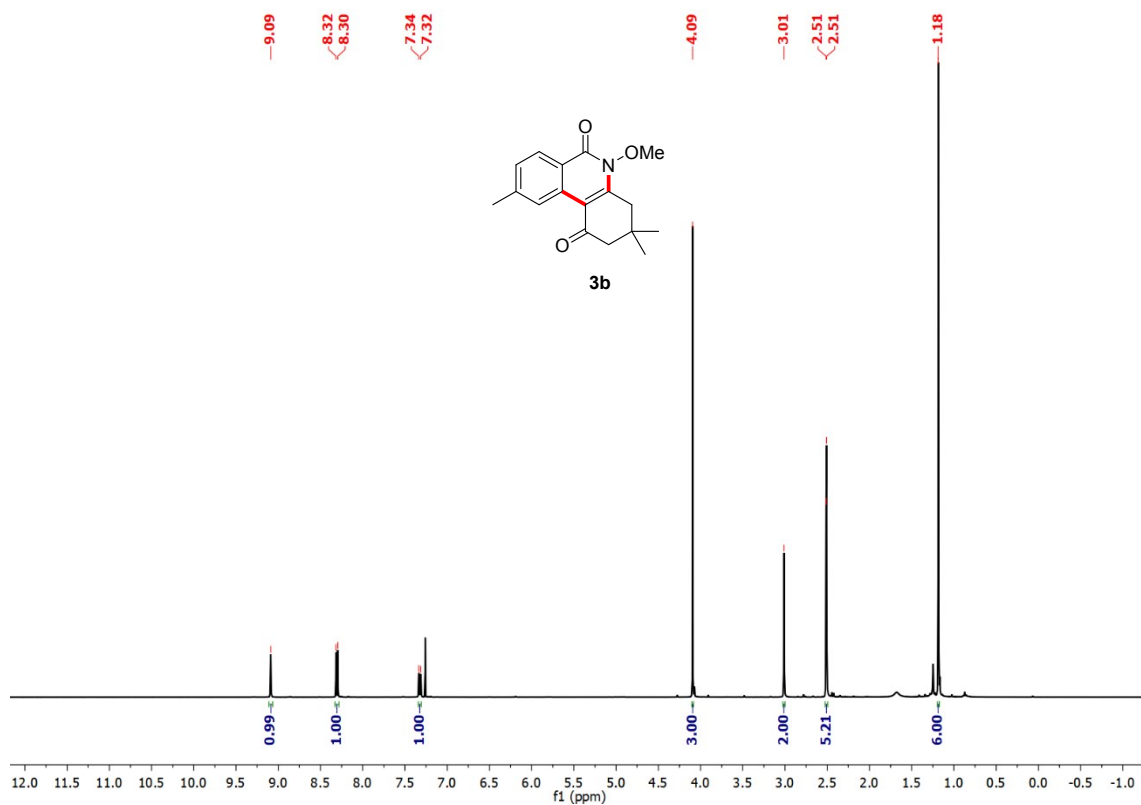

<sup>1</sup>H NMR spectrum of compound 3b in CDCl<sub>3</sub>

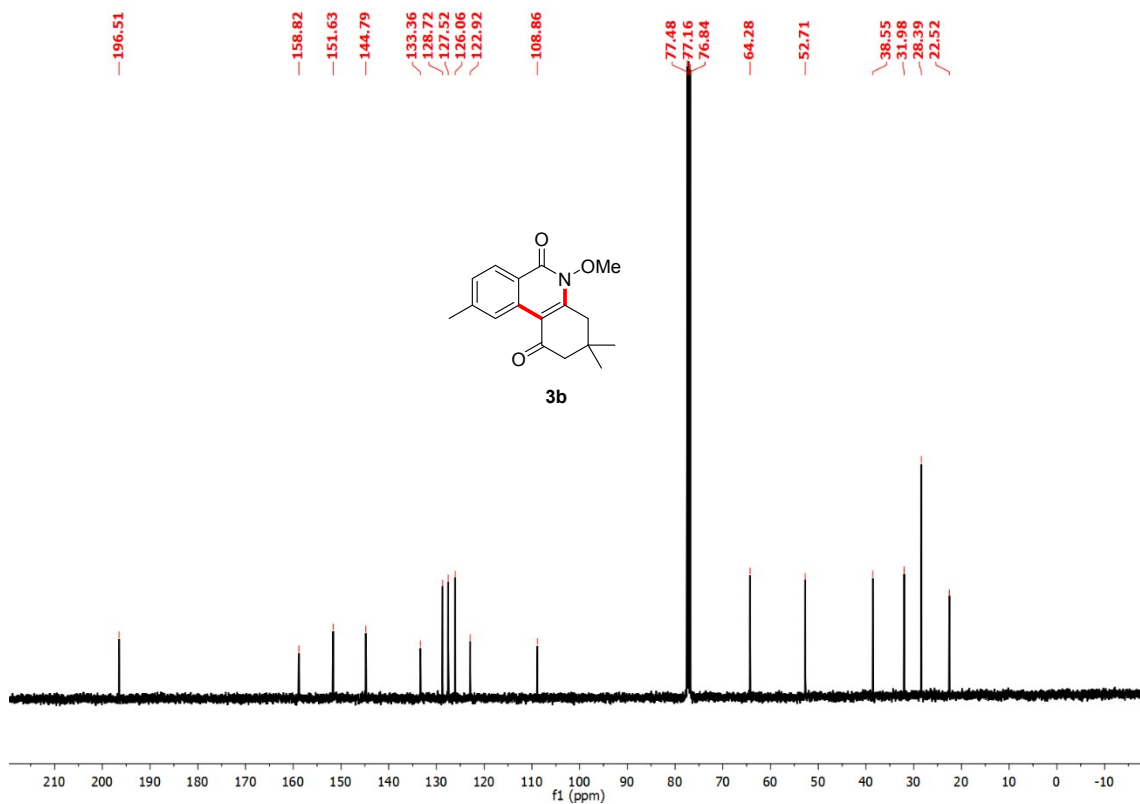

<sup>13</sup>C NMR spectrum of compound 3b in CDCl<sub>3</sub>

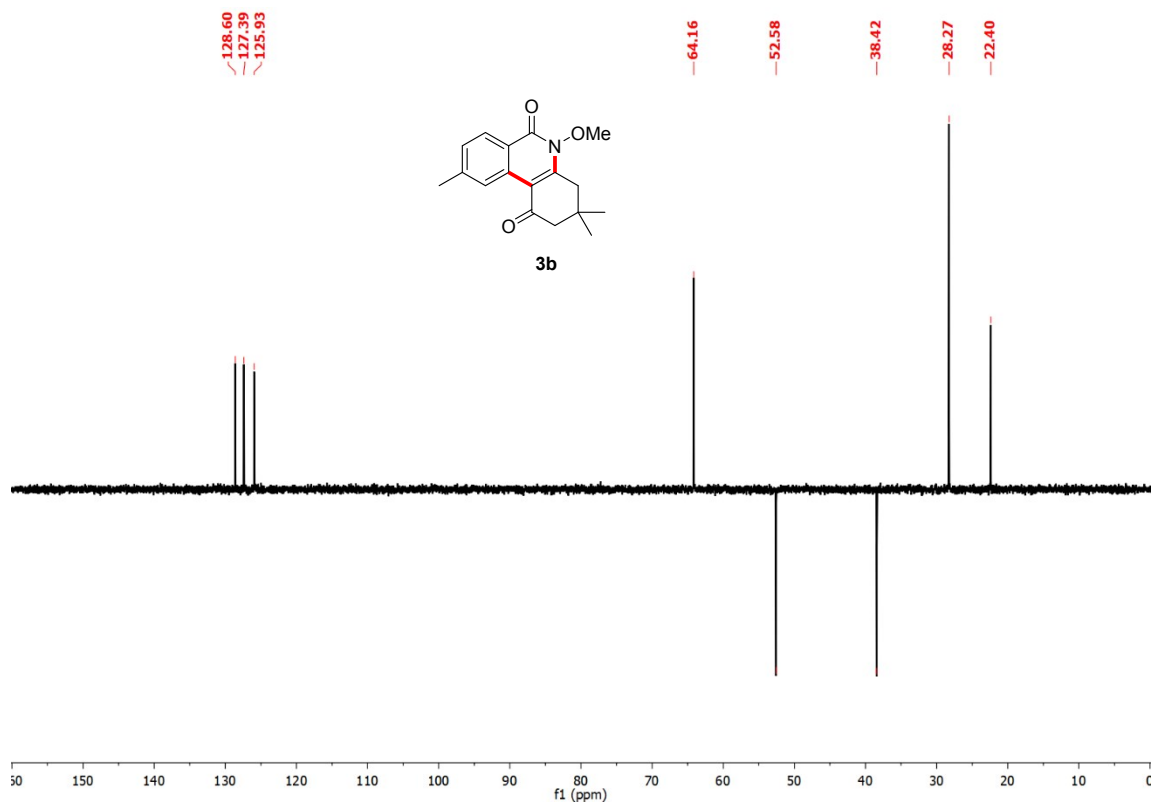

DEPT-135 NMR spectrum of compound 3b in CDCl<sub>3</sub>

# UOH -SCHOOL OF CHEMISTRY -HRMS

**Analysis Info**

Analysis Name D:\Data\2018\PROF RNDEC\NB-217.d  
 Method tune\_low.m  
 Sample Name NB-217-MEOH  
 Comment

Acquisition Date 12/28/2018 10:52:52 AM  
 Operator UOH-Chemistry  
 Instrument maXis 10138

**Acquisition Parameter**

|             |            |                       |           |                  |           |
|-------------|------------|-----------------------|-----------|------------------|-----------|
| Source Type | ESI        | Ion Polarity          | Positive  | Set Nebulizer    | 0.4 Bar   |
| Focus       | Not active | Set Capillary         | 2800 V    | Set Dry Heater   | 200 °C    |
| Scan Begin  | 50 m/z     | Set End Plate Offset  | -500 V    | Set Dry Gas      | 6.0 l/min |
| Scan End    | 1800 m/z   | Set Collision Cell RF | 350.0 Vpp | Set Divert Valve | Waste     |

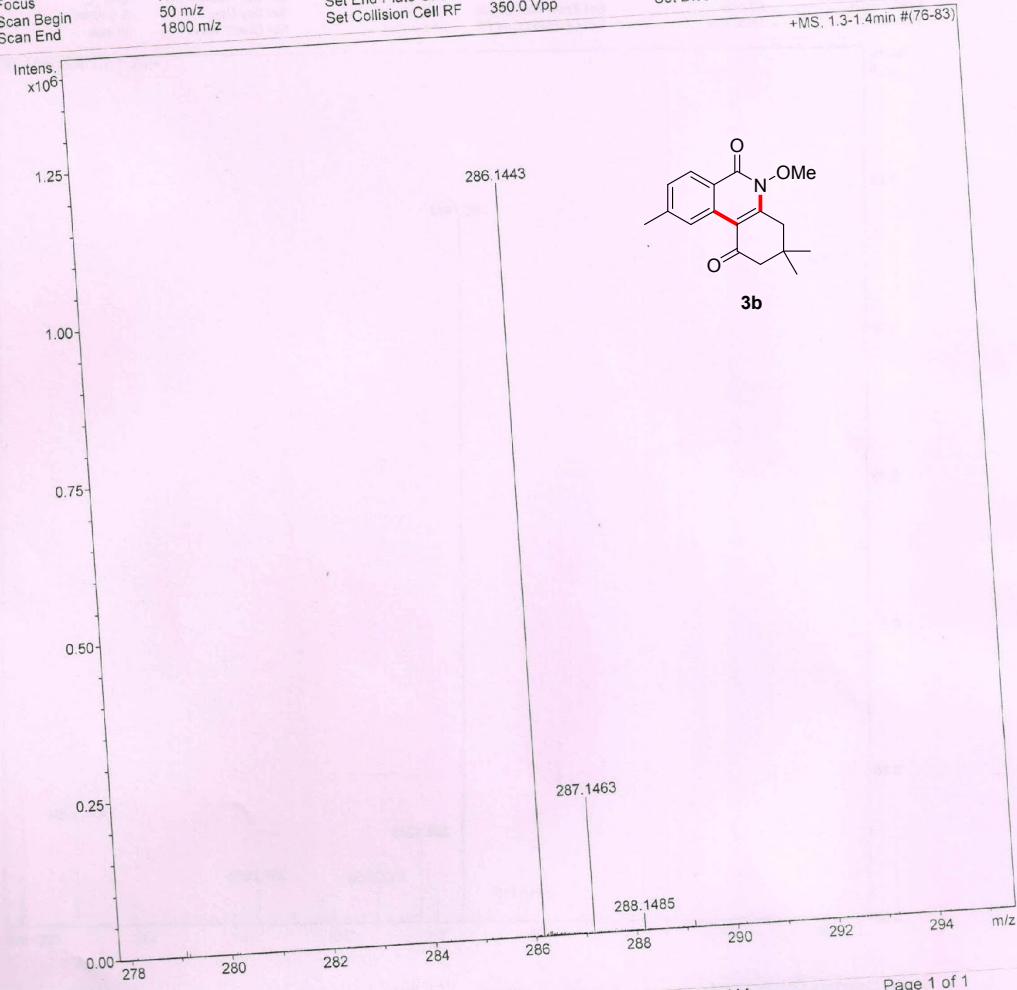

**HRMS spectrum of compound 3b**

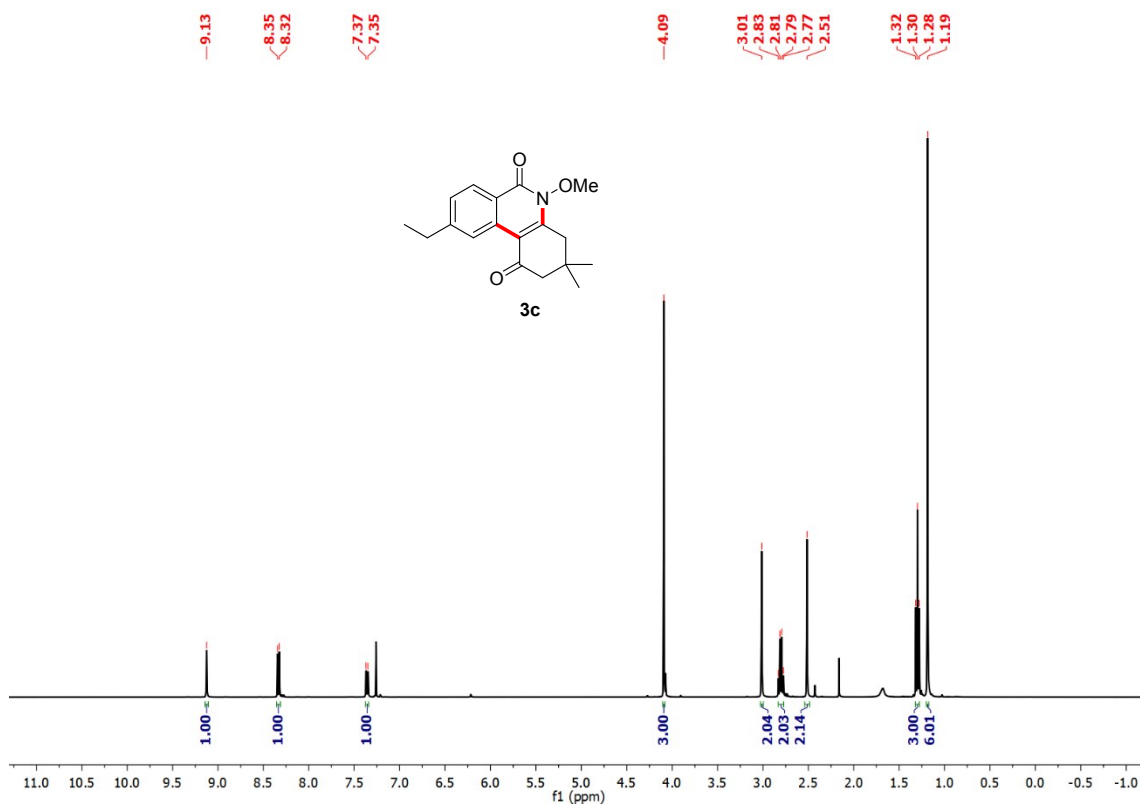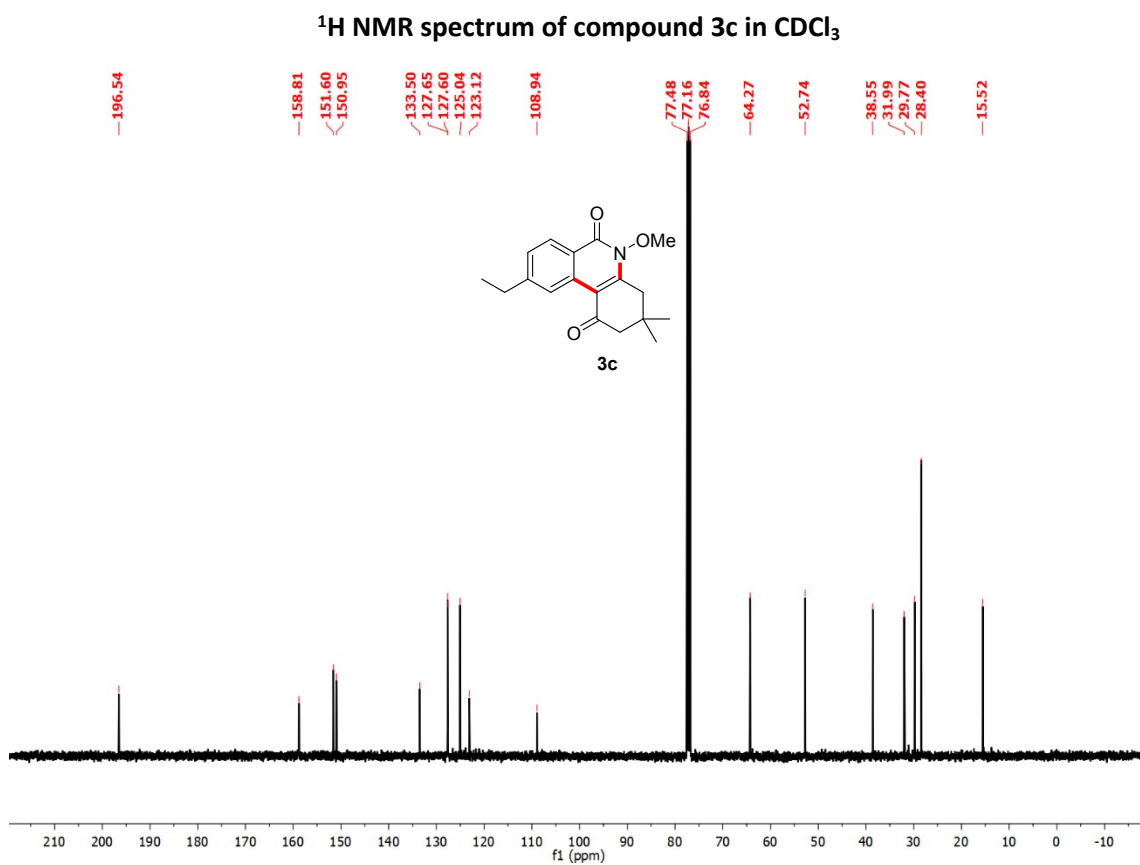



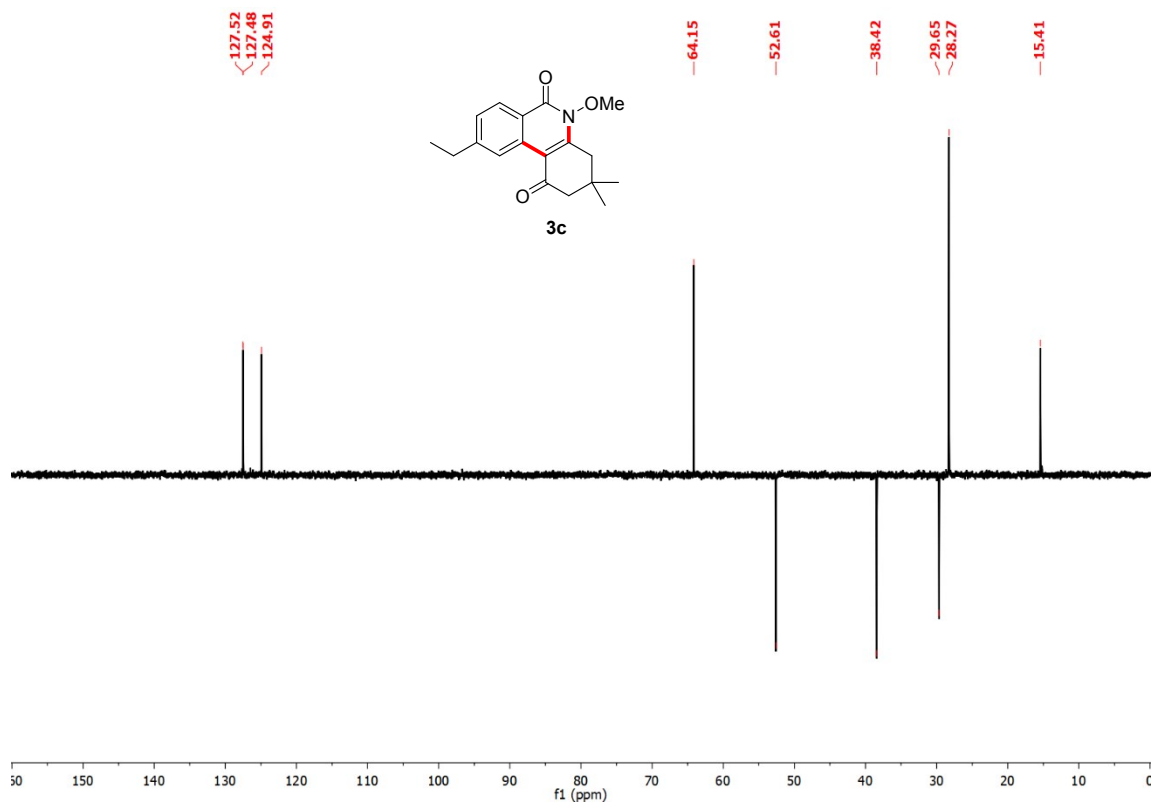

DEPT-135 NMR spectrum of compound 3c in CDCl<sub>3</sub>

# UOH -SCHOOL OF CHEMISTRY -HRMS

**Analysis Info**

Analysis Name D:\Data\2018\PROF RN\NOV\IW-226.d  
 Method tune\_low.m  
 Sample Name IW-226-CHCL3-ACN  
 Comment

Acquisition Date 11/13/2018 10:42:36 AM

Operator UOH-Chemistry  
 Instrument maXis 10138

**Acquisition Parameter**

|             |            |                       |           |                  |           |
|-------------|------------|-----------------------|-----------|------------------|-----------|
| Source Type | ESI        | Ion Polarity          | Positive  | Set Nebulizer    | 0.4 Bar   |
| Focus       | Not active | Set Capillary         | 3000 V    | Set Dry Heater   | 200 °C    |
| Scan Begin  | 50 m/z     | Set End Plate Offset  | -500 V    | Set Dry Gas      | 6.0 l/min |
| Scan End    | 1800 m/z   | Set Collision Cell RF | 350.0 Vpp | Set Divert Valve | Waste     |

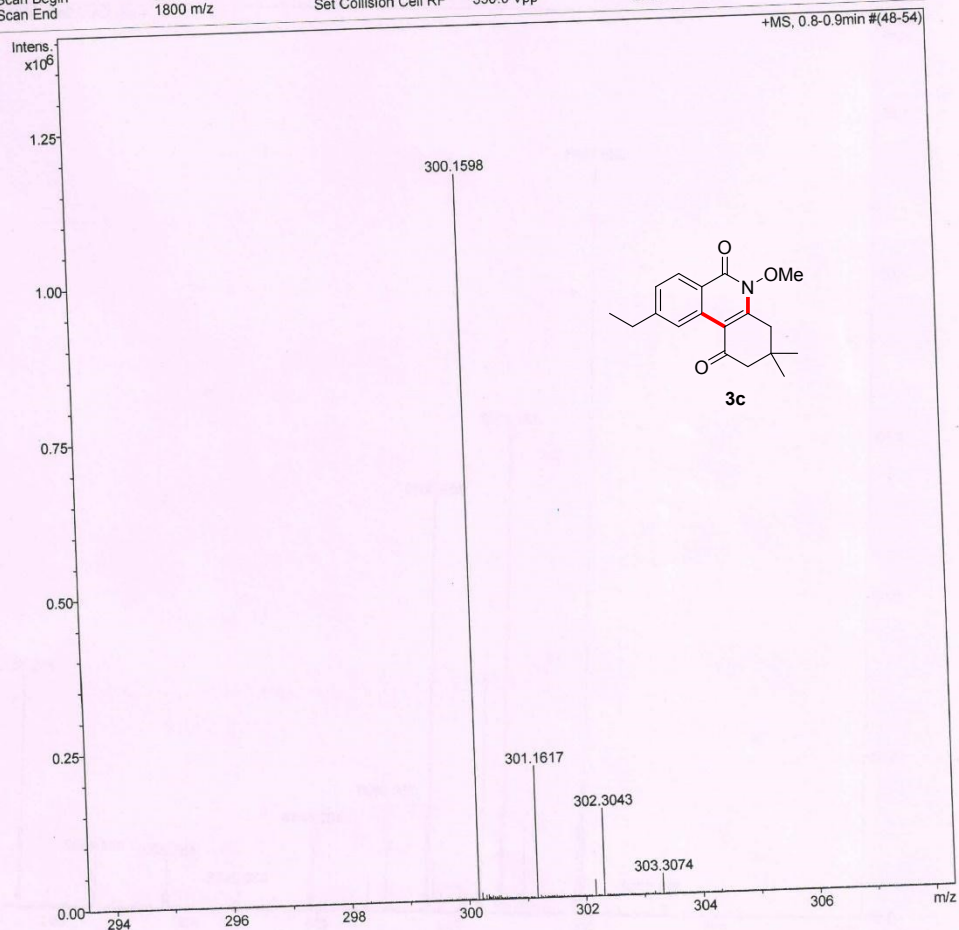

**HRMS spectrum of compound 3c**

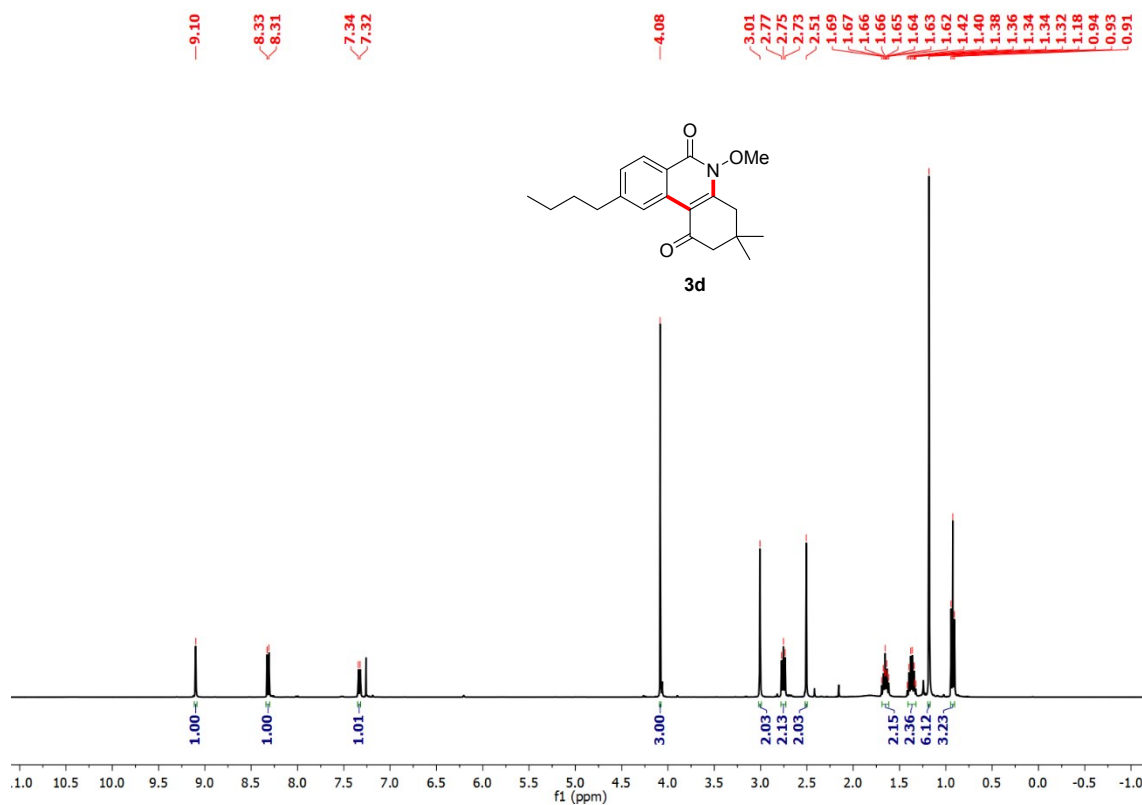

<sup>1</sup>H NMR spectrum of compound 3d in CDCl<sub>3</sub>

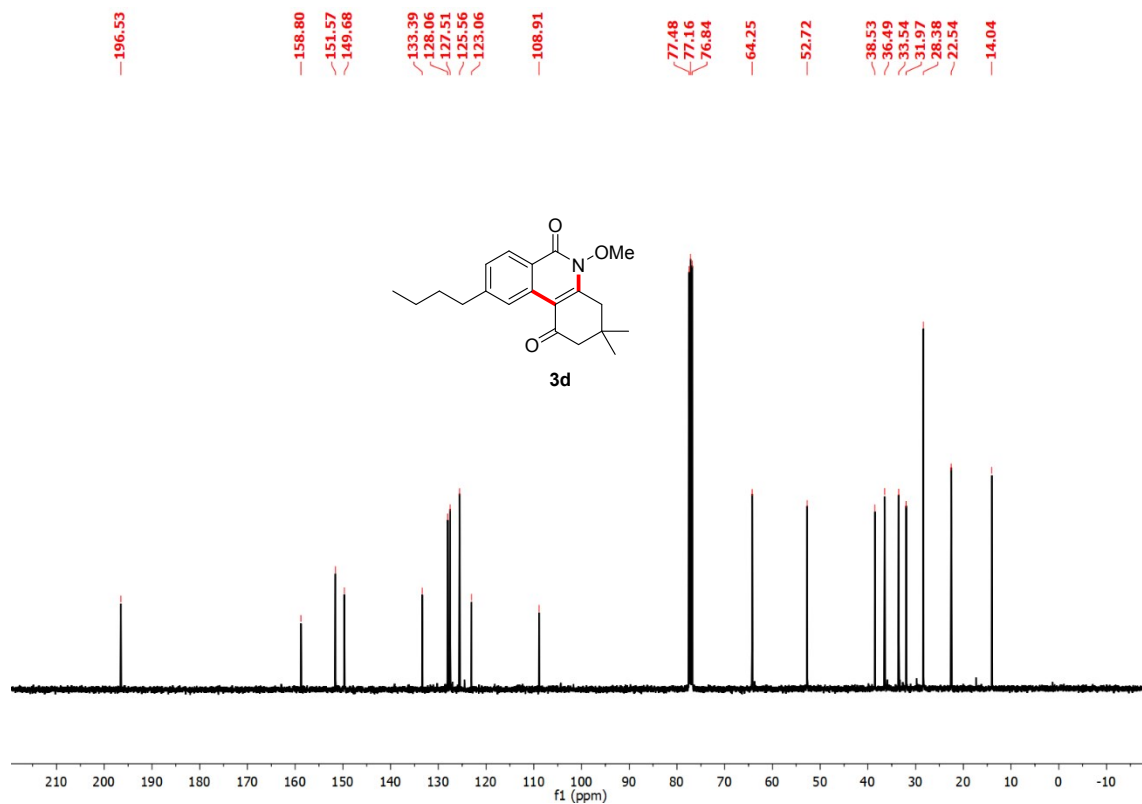

<sup>13</sup>C NMR spectrum of compound 3d in CDCl<sub>3</sub>

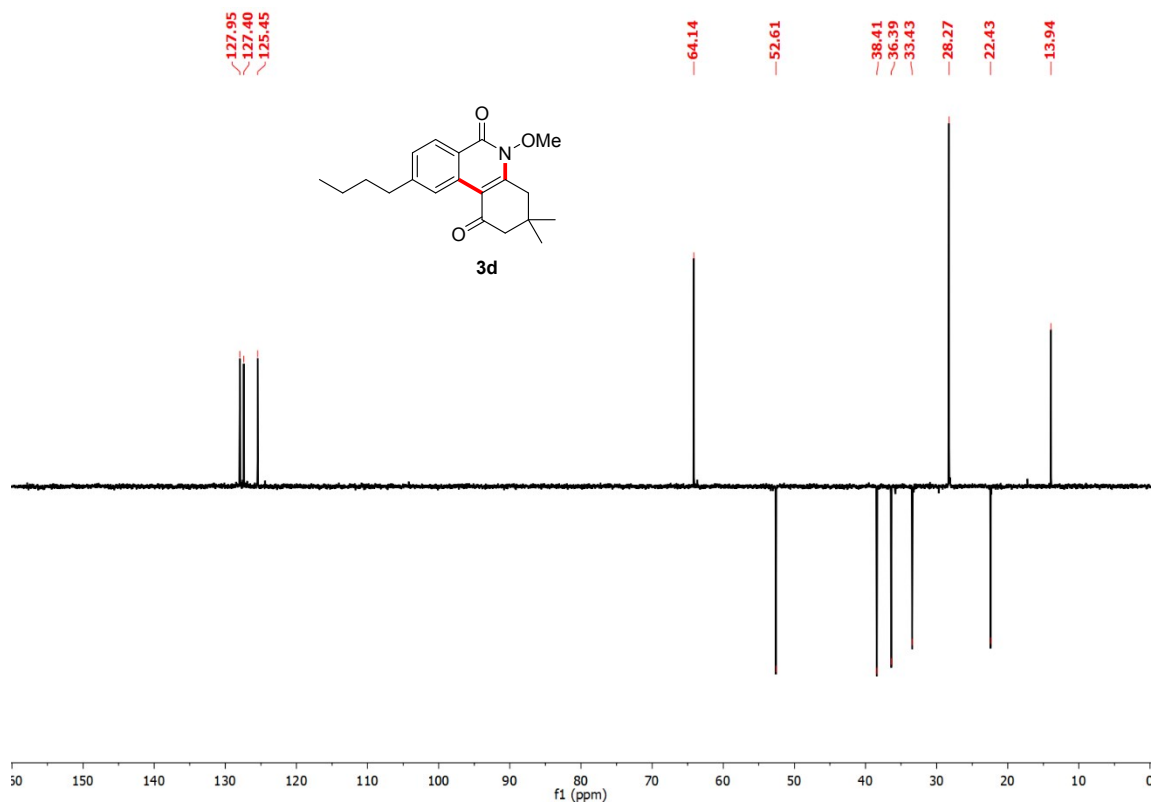

DEPT-135 NMR spectrum of compound 3d in CDCl<sub>3</sub>

# UOH -SCHOOL OF CHEMISTRY -HRMS

**Analysis Info**

Analysis Name D:\Data\2018\PROF RN\NOV\IW-225.d  
 Method tune\_low\_PosR.m  
 Sample Name IW-225-MEOH  
 Comment

Acquisition Date 11/9/2018 12:09:40 PM

Operator UOH-Chemistry  
 Instrument maXis 10138

**Acquisition Parameter**

|             |            |                       |           |                  |           |
|-------------|------------|-----------------------|-----------|------------------|-----------|
| Source Type | ESI        | Ion Polarity          | Positive  | Set Nebulizer    | 0.3 Bar   |
| Focus       | Not active | Set Capillary         | 2600 V    | Set Dry Heater   | 250 °C    |
| Scan Begin  | 100 m/z    | Set End Plate Offset  | -500 V    | Set Dry Gas      | 4.0 l/min |
| Scan End    | 2500 m/z   | Set Collision Cell RF | 150.0 Vpp | Set Divert Valve | Waste     |

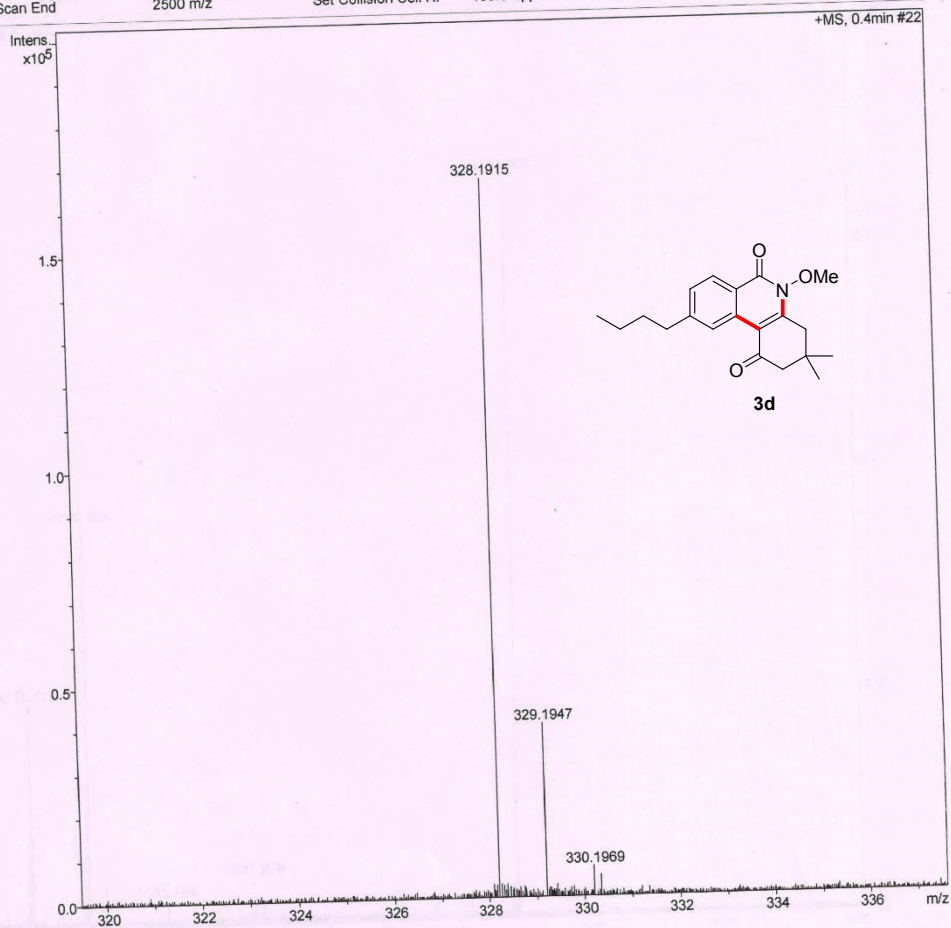

**HRMS spectrum of compound 3d**

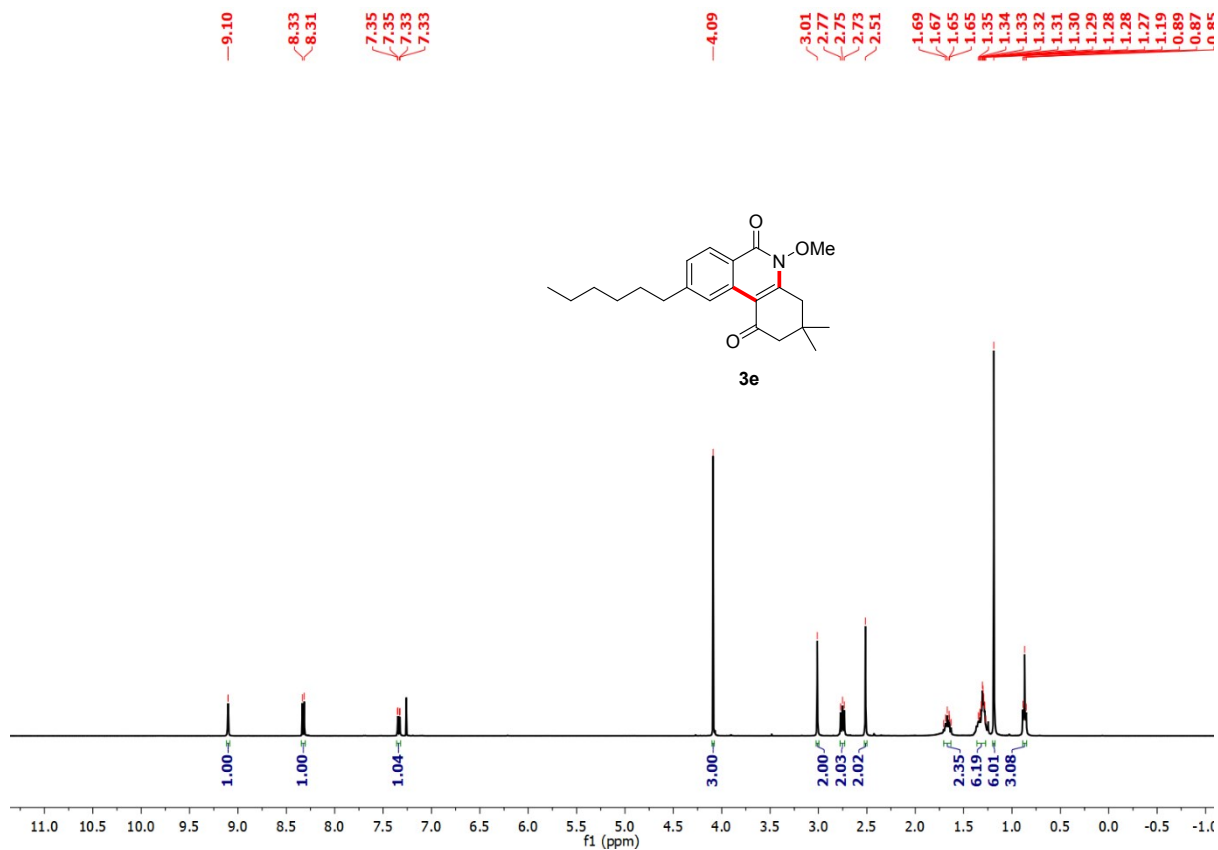

<sup>1</sup>H NMR spectrum of compound 3e in CDCl<sub>3</sub>

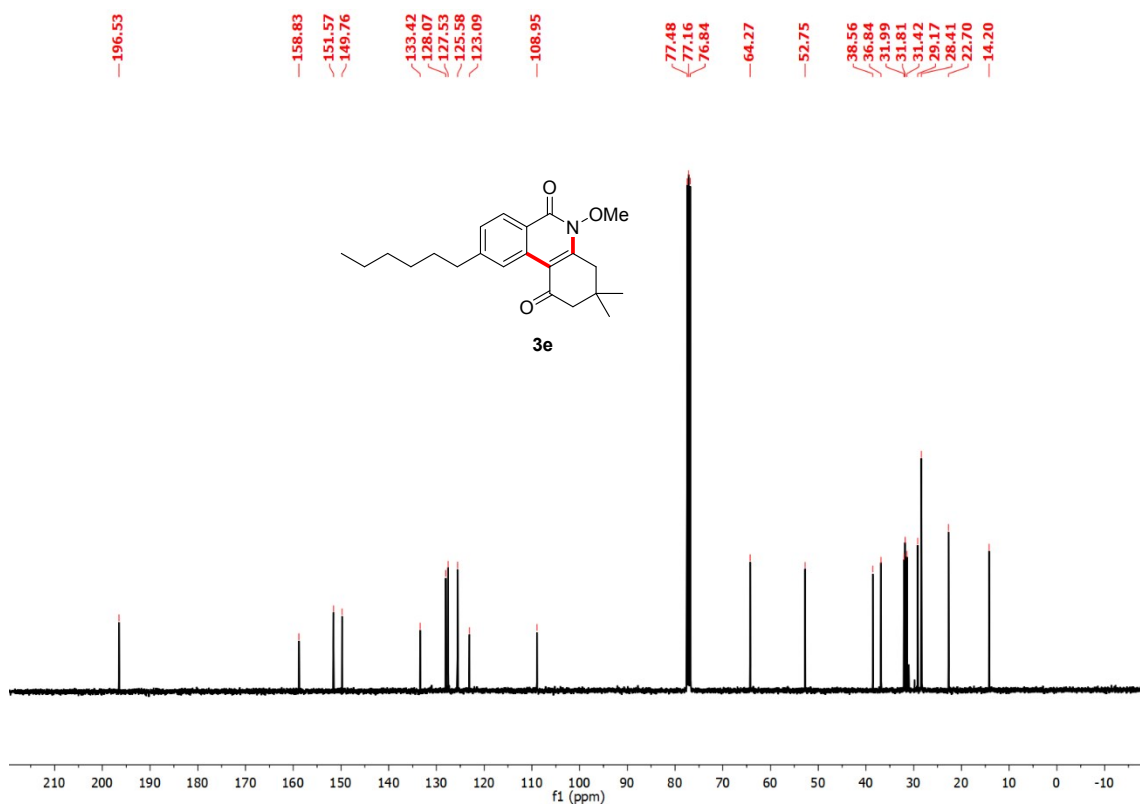

<sup>13</sup>C NMR spectrum of compound 3e in CDCl<sub>3</sub>

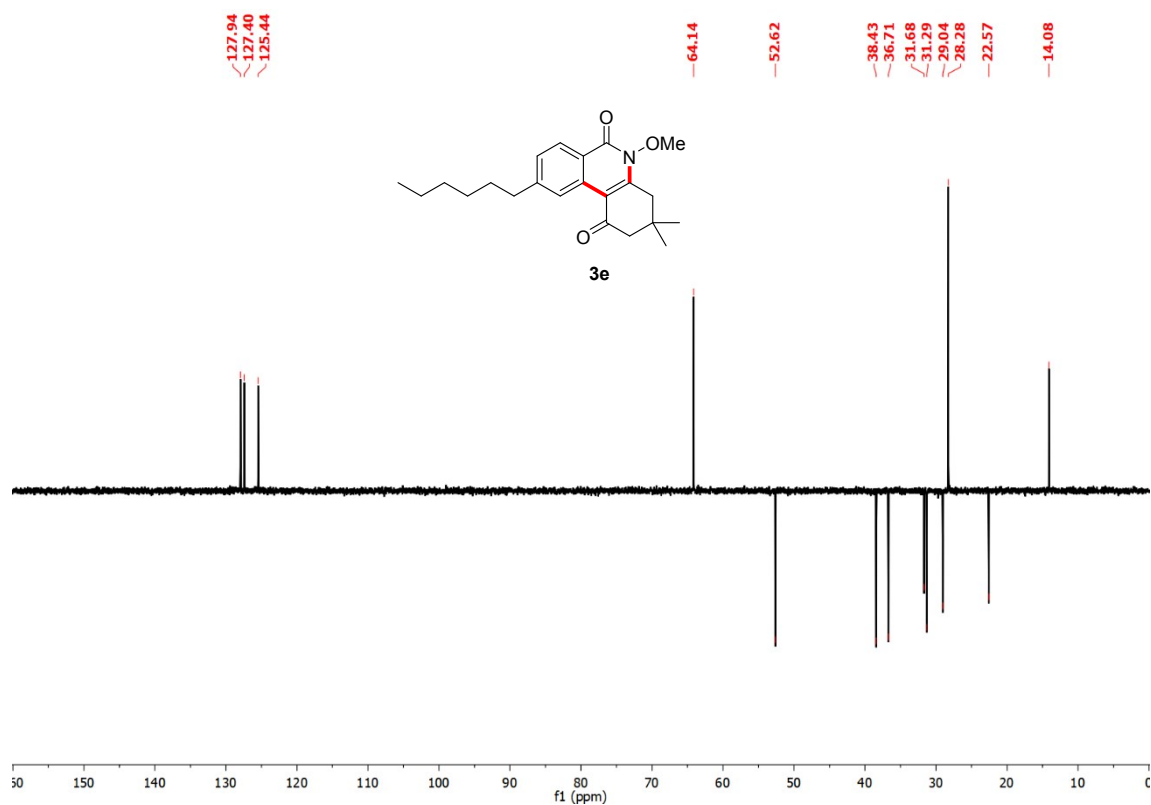

DEPT-135 NMR spectrum of compound 3e in CDCl<sub>3</sub>

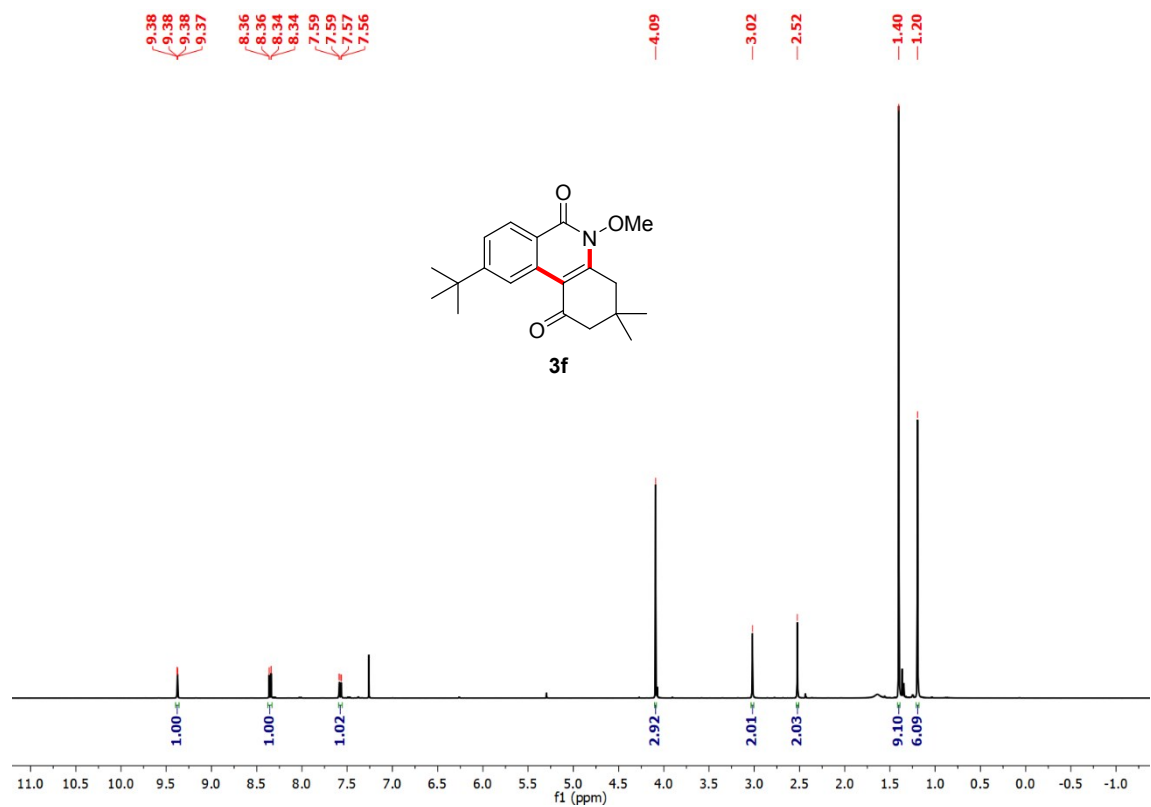

<sup>1</sup>H NMR spectrum of compound 3f in CDCl<sub>3</sub>

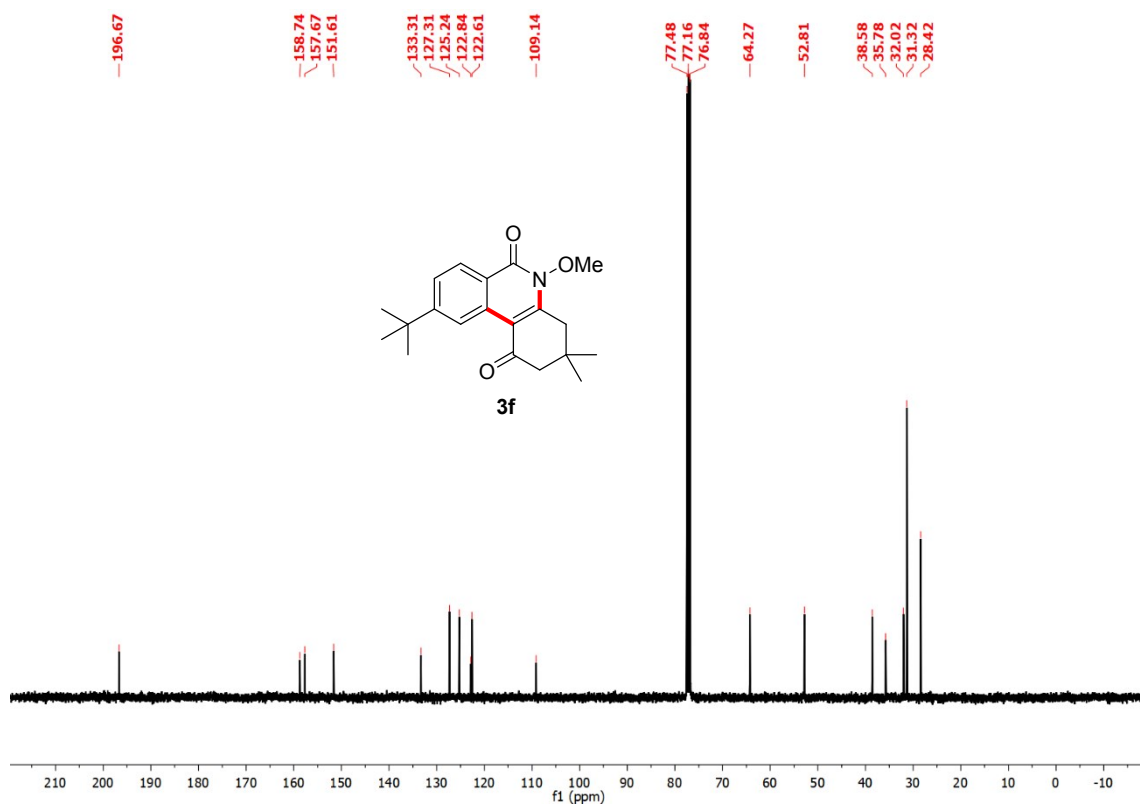

**13C NMR spectrum of compound 3f in CDCl<sub>3</sub>**

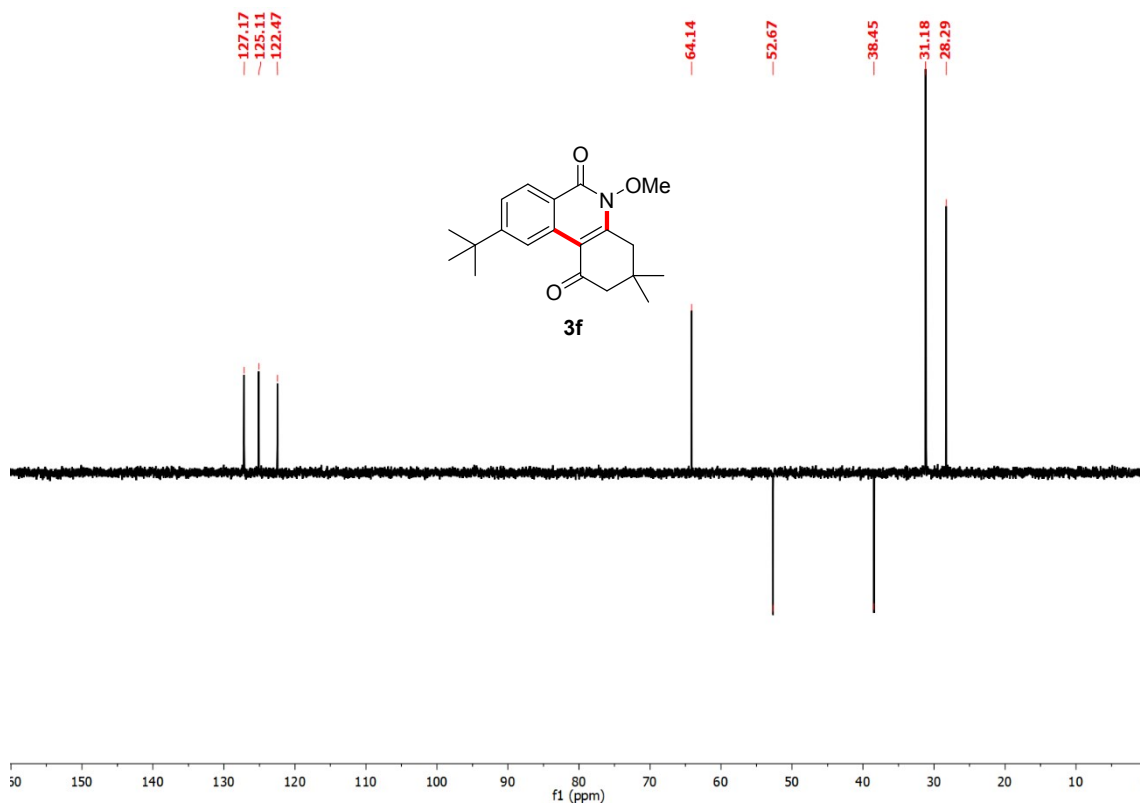

**DEPT-135 NMR spectrum of compound 3f in CDCl<sub>3</sub>**



## UOH -SCHOOL OF CHEMISTRY -HRMS

### Analysis Info

Analysis Name D:\Data\2018\PROF RNNOVIW-224R.d  
 Method tune\_low\_PosR.m  
 Sample Name IW-224-MEOH  
 Comment

Acquisition Date 11/9/2018 12:07:08 PM

Operator UOH-Chemistry  
 Instrument maXis 10138

### Acquisition Parameter

|             |            |                       |           |                  |           |
|-------------|------------|-----------------------|-----------|------------------|-----------|
| Source Type | ESI        | Ion Polarity          | Positive  | Set Nebulizer    | 0.3 Bar   |
| Focus       | Not active | Set Capillary         | 2600 V    | Set Dry Heater   | 250 °C    |
| Scan Begin  | 100 m/z    | Set End Plate Offset  | -500 V    | Set Dry Gas      | 4.0 l/min |
| Scan End    | 2500 m/z   | Set Collision Cell RF | 150.0 Vpp | Set Divert Valve | Waste     |

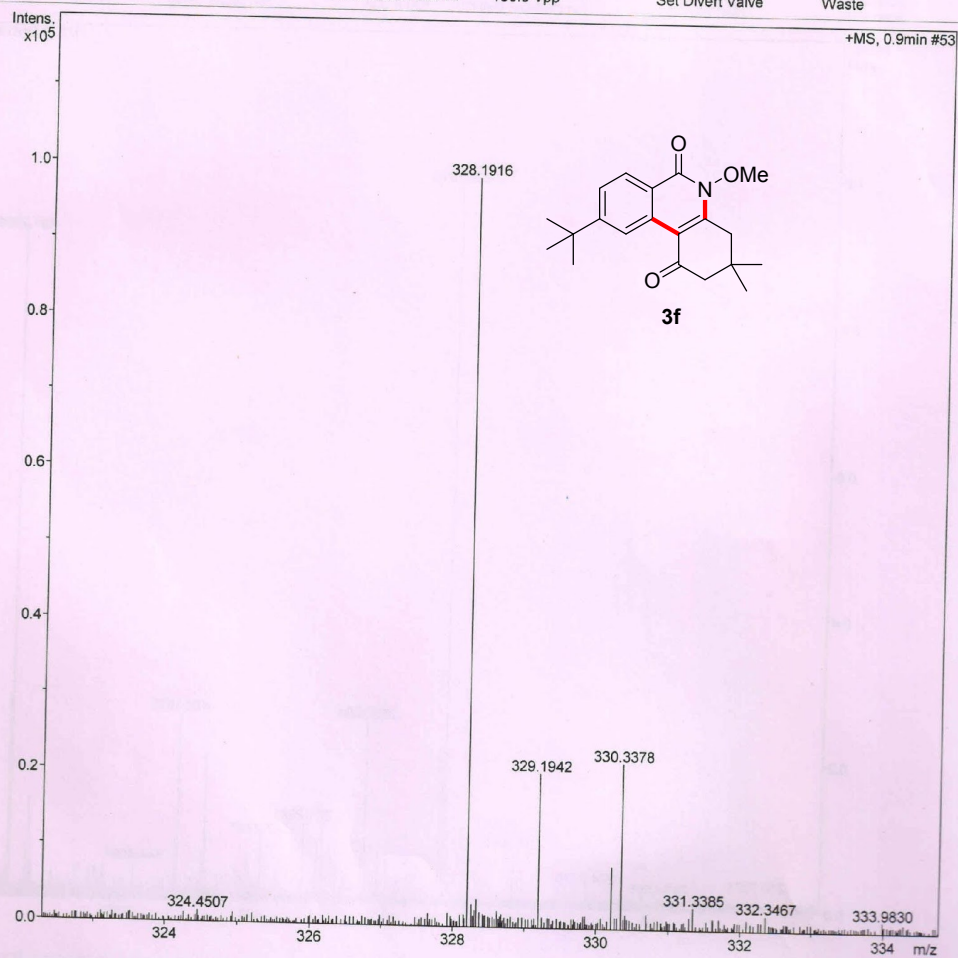

Bruker Compass DataAnalysis 4.0

printed: 11/9/2018 12:15:20 PM

Page 1 of 1

**HRMS spectrum of compound 3f**

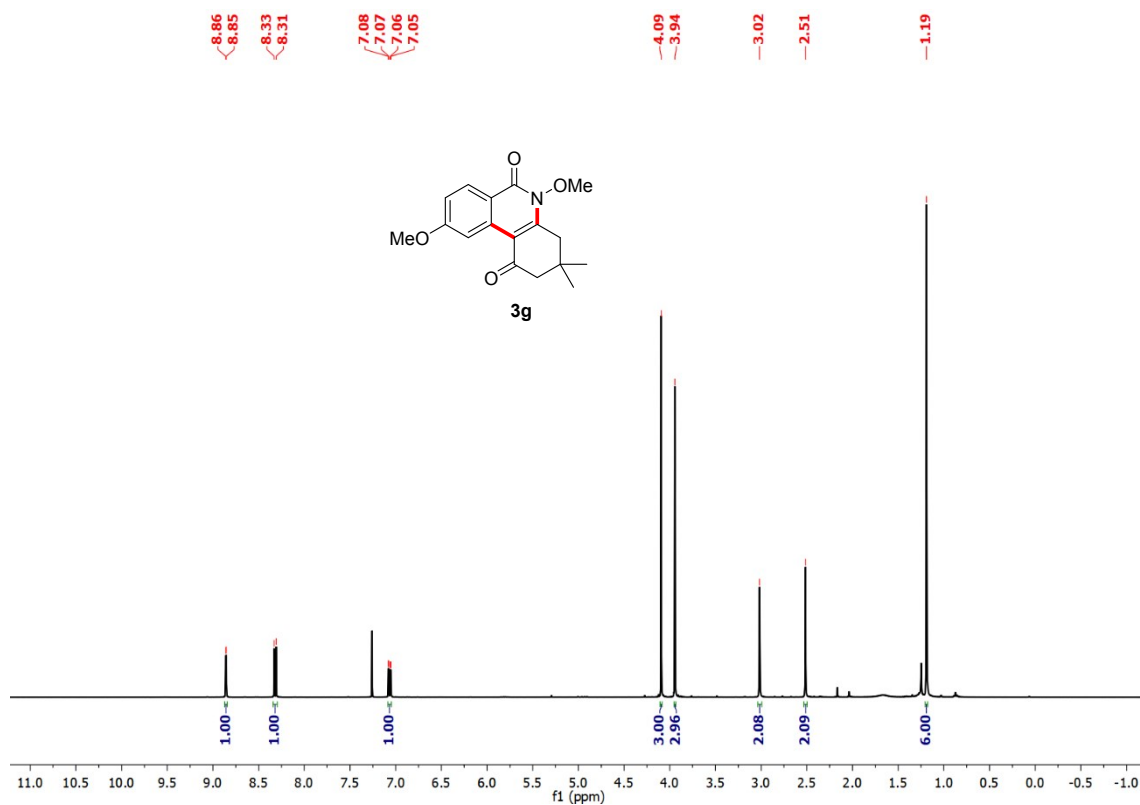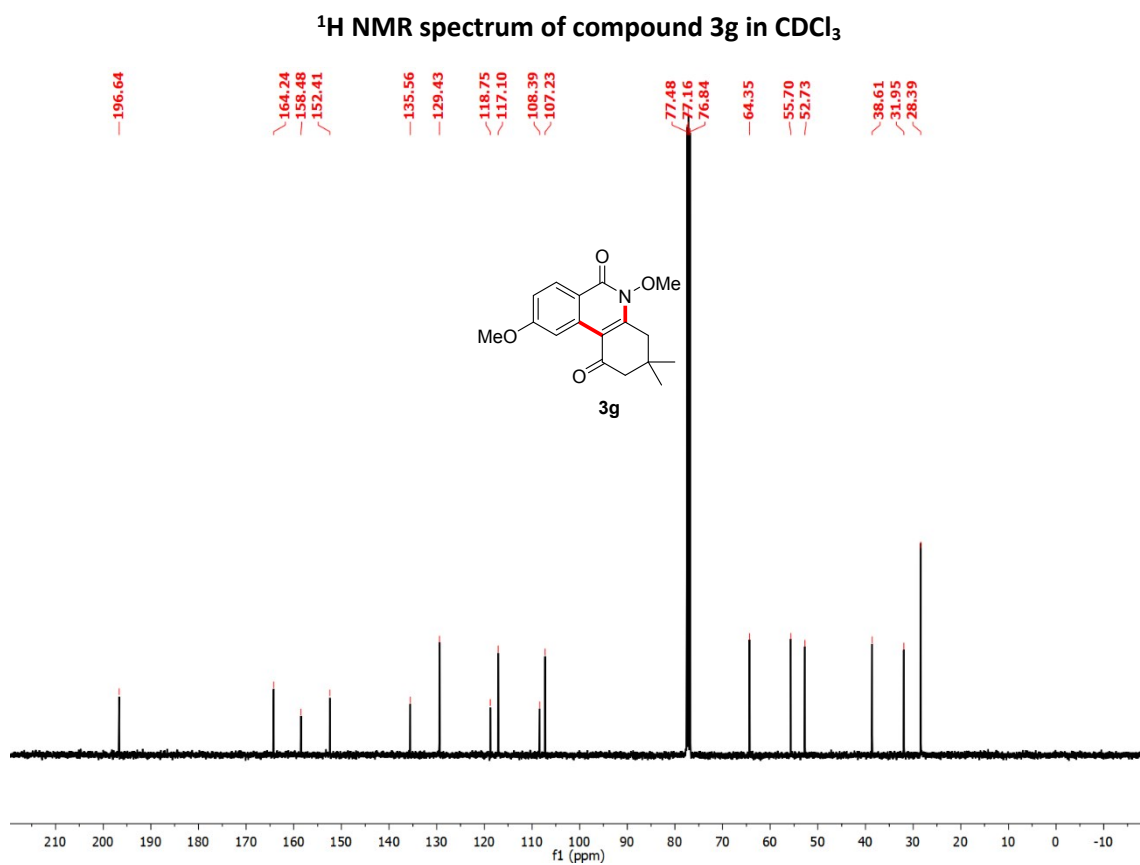

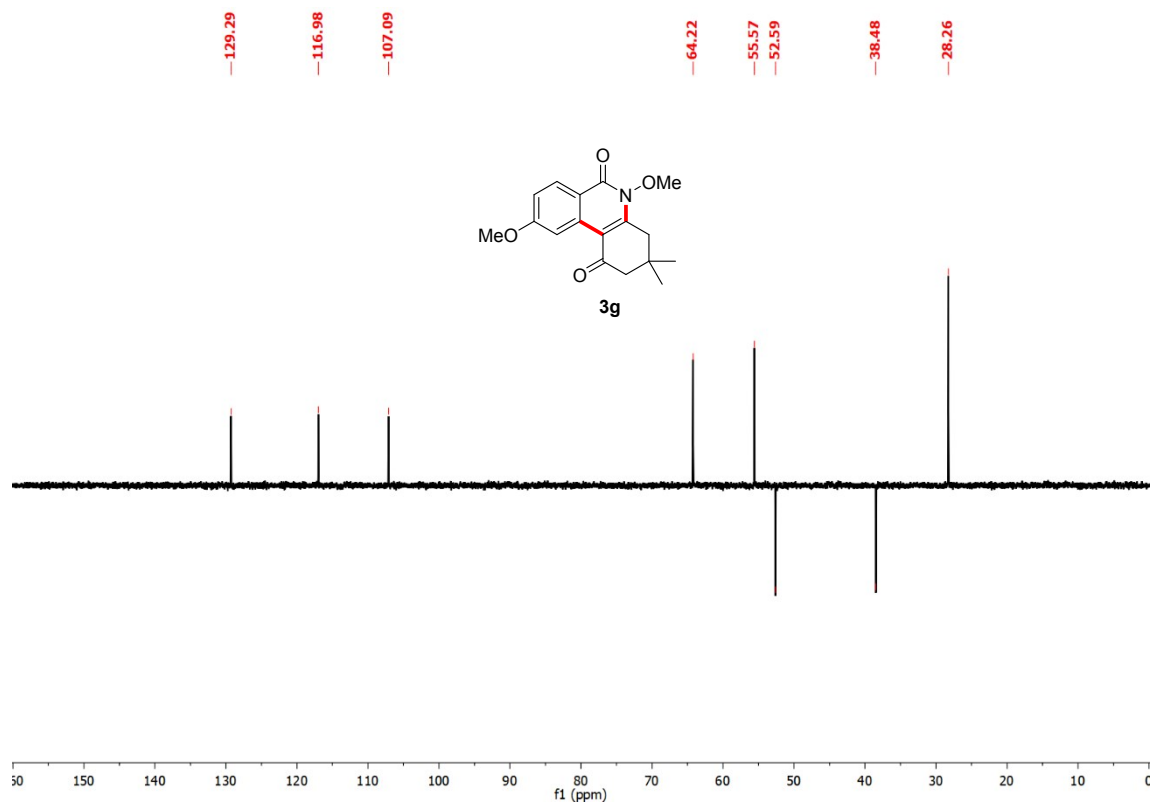

DEPT-135 NMR spectrum of compound 3g in CDCl<sub>3</sub>

## UOH -SCHOOL OF CHEMISTRY -HRMS

### Analysis Info

Analysis Name D:\Data\2018\PROF RN\DEC\ASB-19.d  
 Method tune\_low.m  
 Sample Name ASB-19-CHCL3-ACN  
 Comment

Acquisition Date 12/4/2018 10:42:42 AM

Operator UOH-Chemistry  
 Instrument maXis 10138

### Acquisition Parameter

|             |            |                       |           |                  |           |
|-------------|------------|-----------------------|-----------|------------------|-----------|
| Source Type | ESI        | Ion Polarity          | Positive  | Set Nebulizer    | 0.4 Bar   |
| Focus       | Not active | Set Capillary         | 3000 V    | Set Dry Heater   | 200 °C    |
| Scan Begin  | 50 m/z     | Set End Plate Offset  | -500 V    | Set Dry Gas      | 6.0 l/min |
| Scan End    | 1800 m/z   | Set Collision Cell RF | 350.0 Vpp | Set Divert Valve | Waste     |

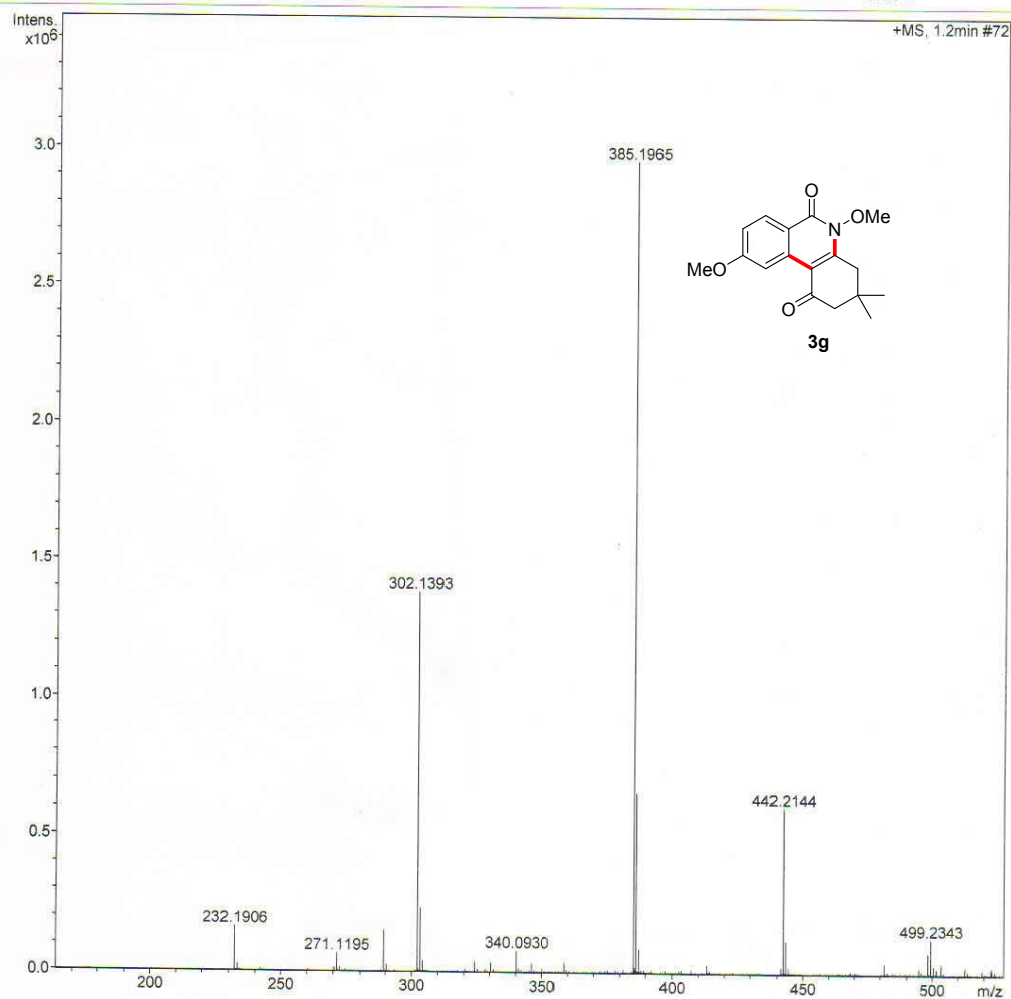

**HRMS spectrum of compound 3g**

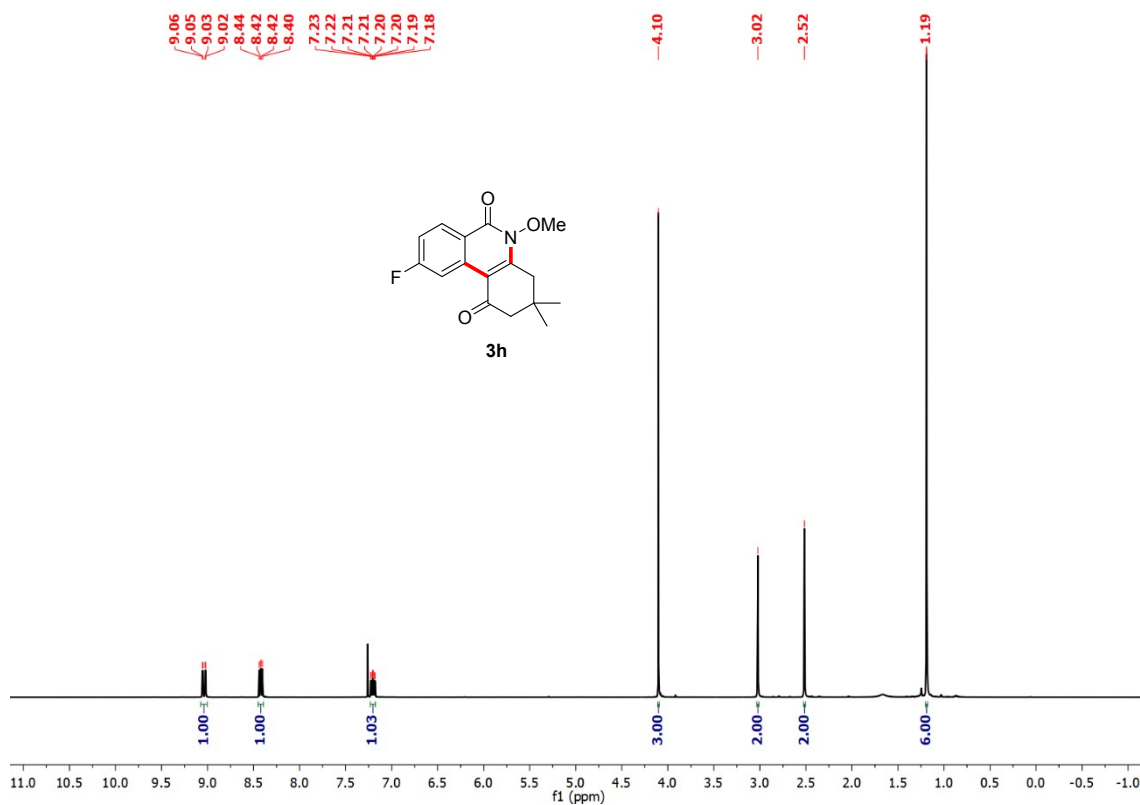

<sup>1</sup>H NMR spectrum of compound 3h in CDCl<sub>3</sub>

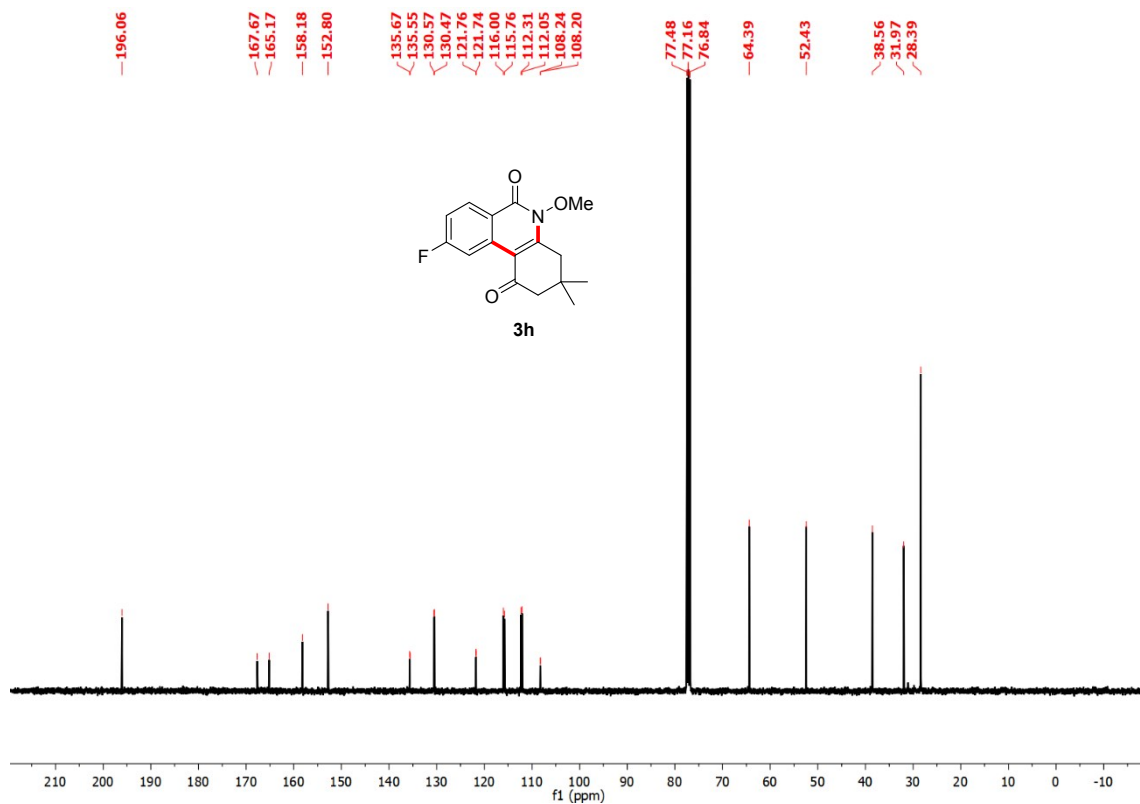

<sup>13</sup>C NMR spectrum of compound 3h in CDCl<sub>3</sub>

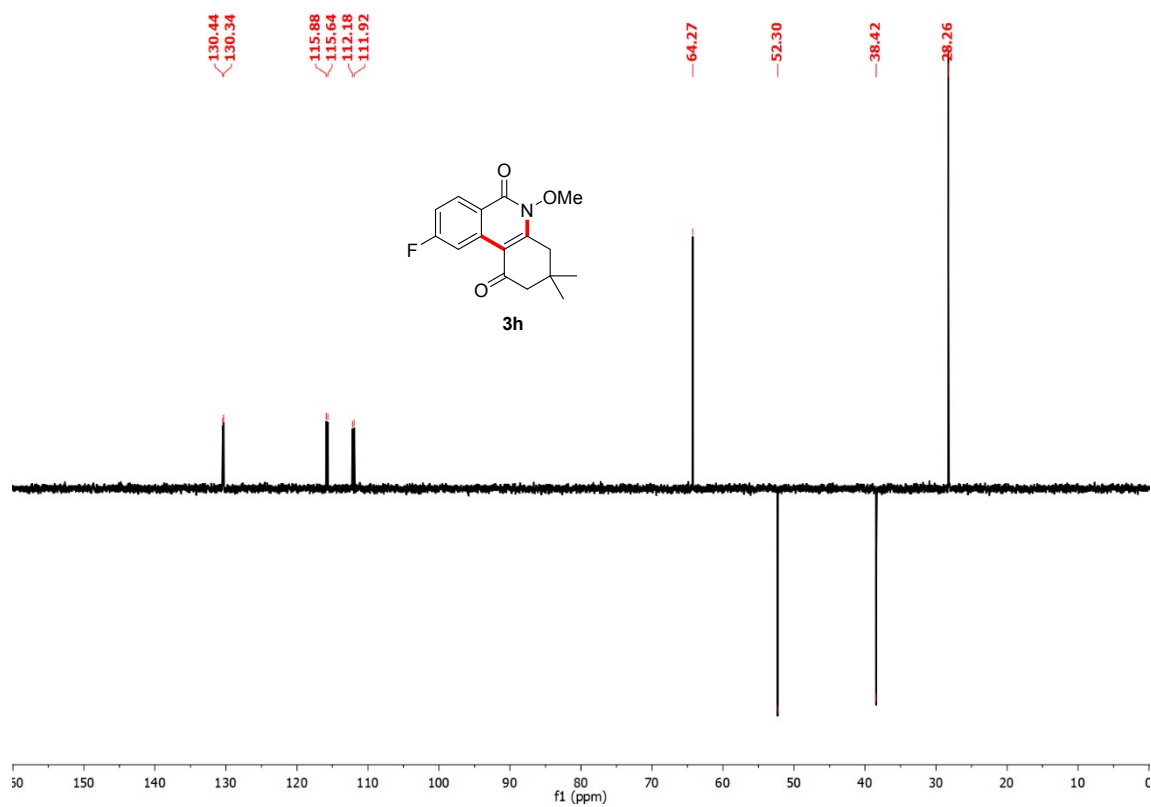

DEPT-135 NMR spectrum of compound 3h in CDCl<sub>3</sub>

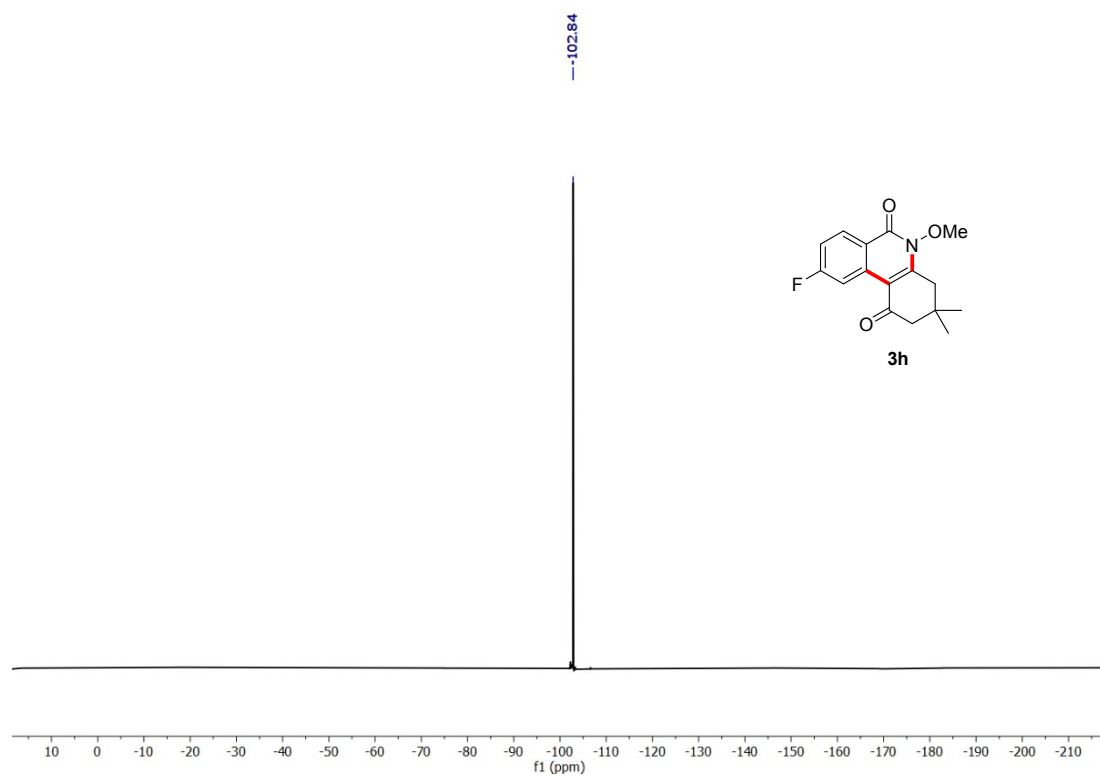

<sup>19</sup>F NMR spectrum of compound 3h in CDCl<sub>3</sub>

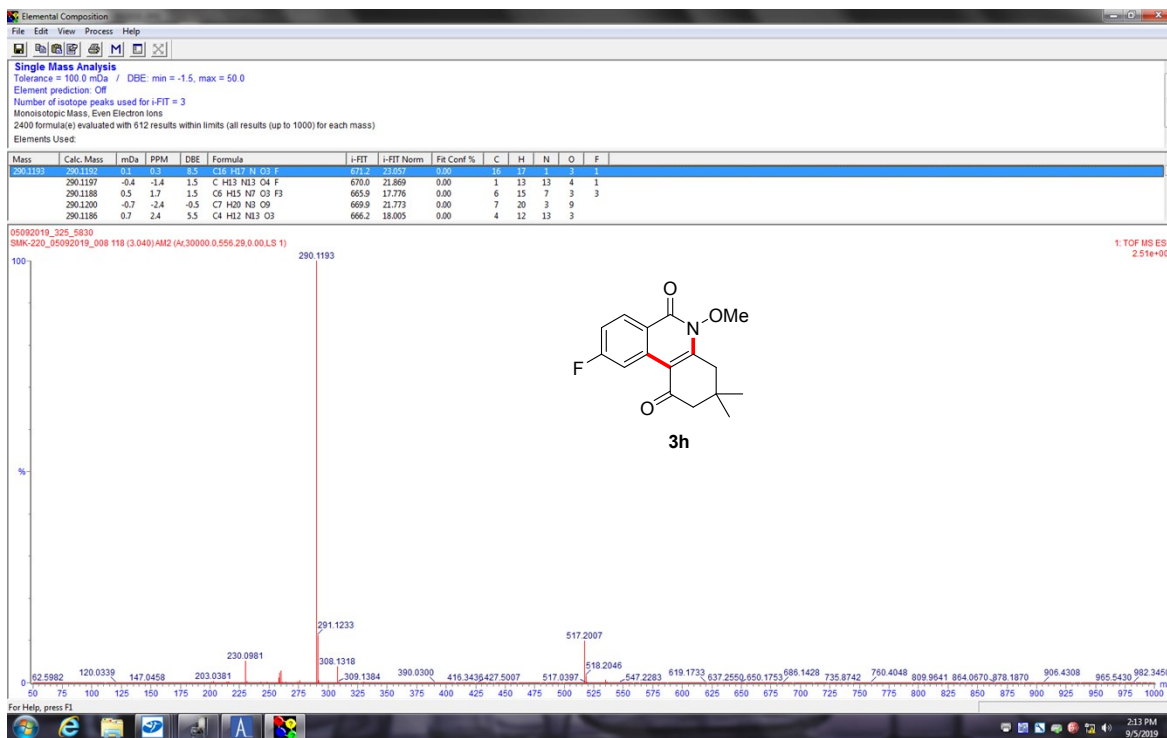

HRMS spectrum of compound 3h

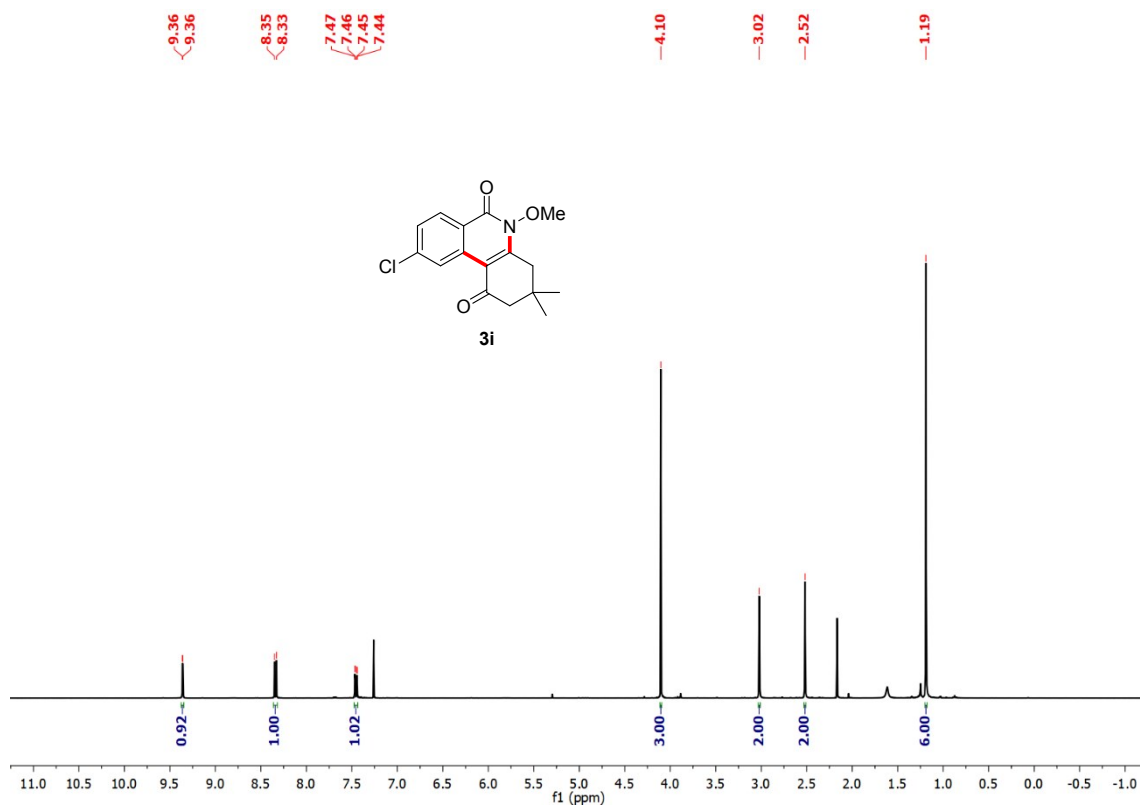

<sup>1</sup>H NMR spectrum of compound 3i in CDCl<sub>3</sub>

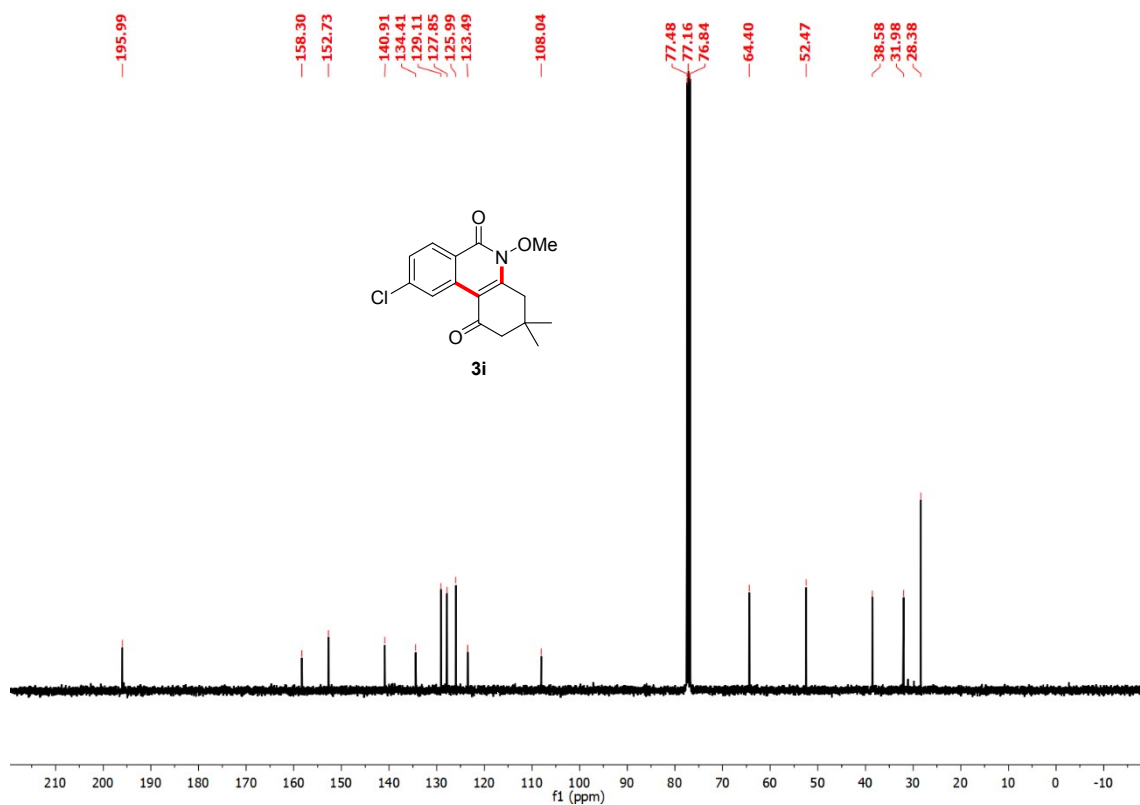

<sup>13</sup>C NMR spectrum of compound **3i** in CDCl<sub>3</sub>

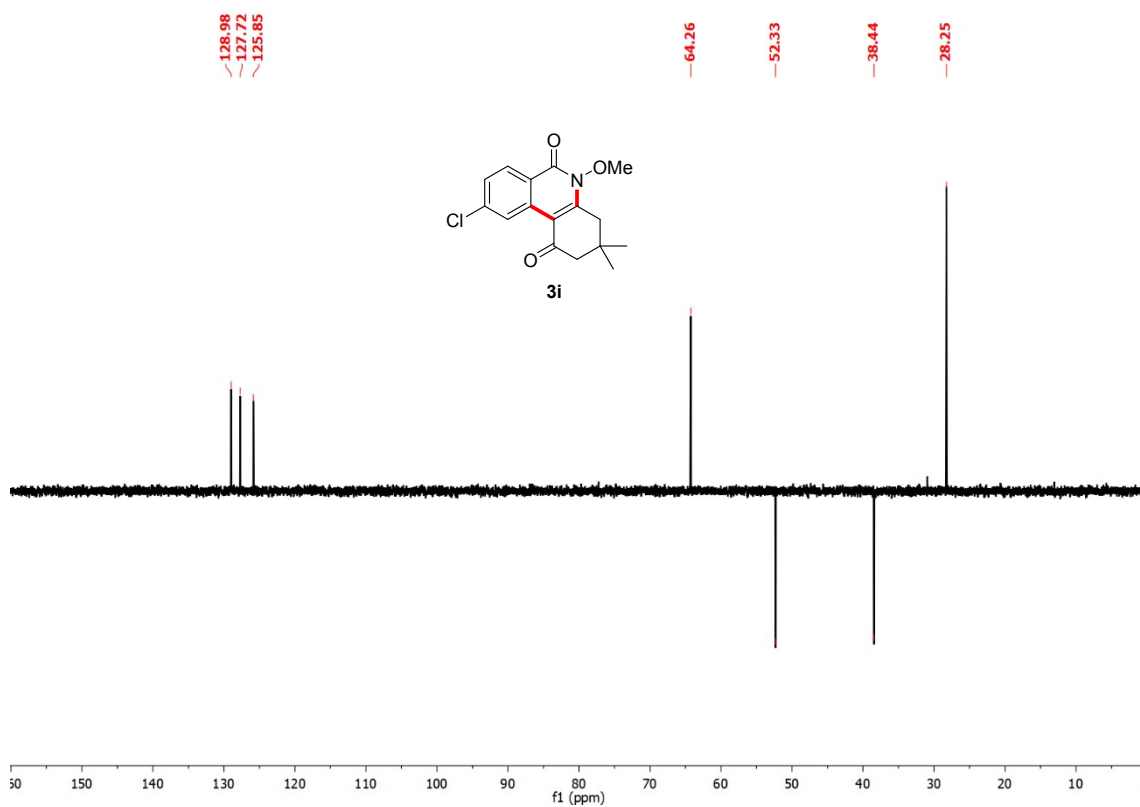

DEPT-135 NMR spectrum of compound **3i** in CDCl<sub>3</sub>



# UOH -SCHOOL OF CHEMISTRY -HRMS

## Analysis Info

Analysis Name D:\Data\2018\PROF RN\NOV\IW-221-r1.d  
Method tune\_low\_PosR.m  
Sample Name IW-221-R1-MEOH  
Comment

Acquisition Date 11/9/2018 11:53:29 AM

Operator UOH-Chemistry  
Instrument maXis 10138

## Acquisition Parameter

|             |            |                       |           |                  |           |
|-------------|------------|-----------------------|-----------|------------------|-----------|
| Source Type | ESI        | Ion Polarity          | Positive  | Set Nebulizer    | 0.3 Bar   |
| Focus       | Not active | Set Capillary         | 2800 V    | Set Dry Heater   | 250 °C    |
| Scan Begin  | 100 m/z    | Set End Plate Offset  | -500 V    | Set Dry Gas      | 5.0 l/min |
| Scan End    | 2500 m/z   | Set Collision Cell RF | 200.0 Vpp | Set Divert Valve | Waste     |

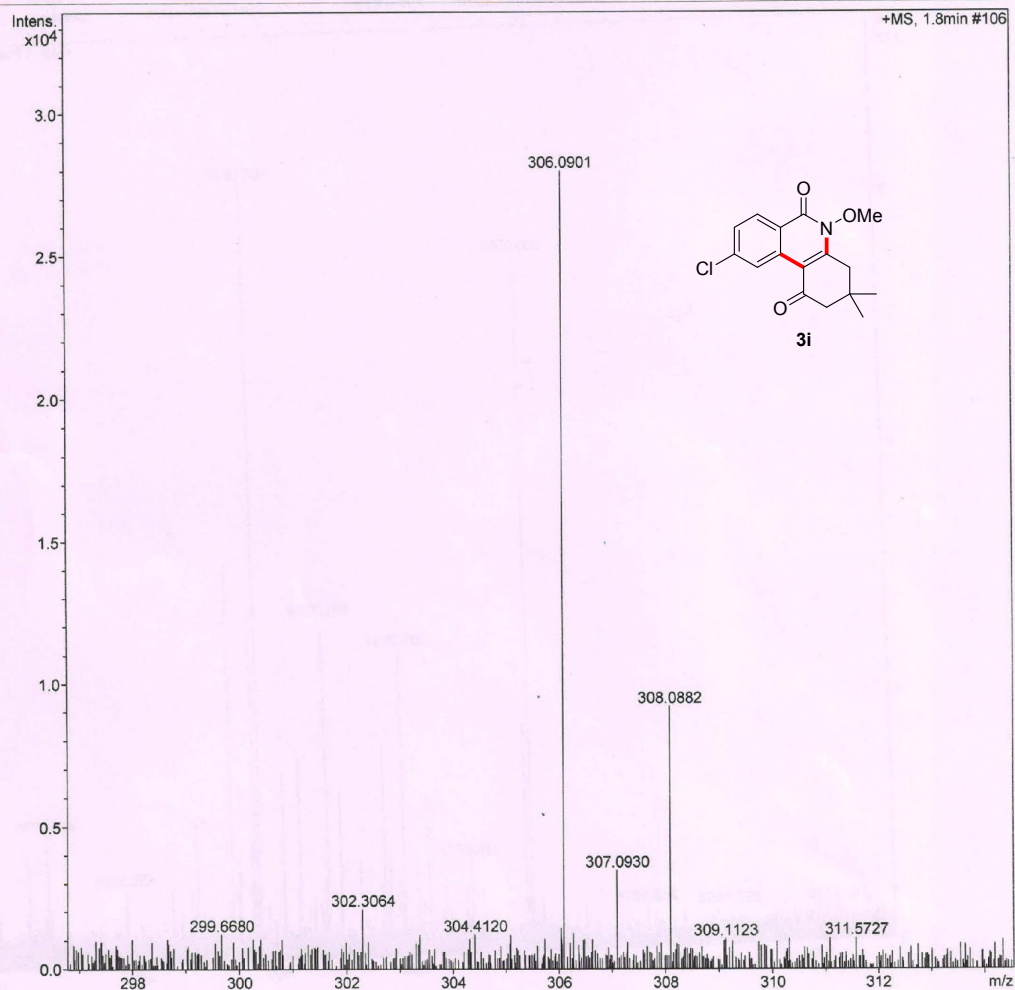

HRMS spectrum of compound **3i**

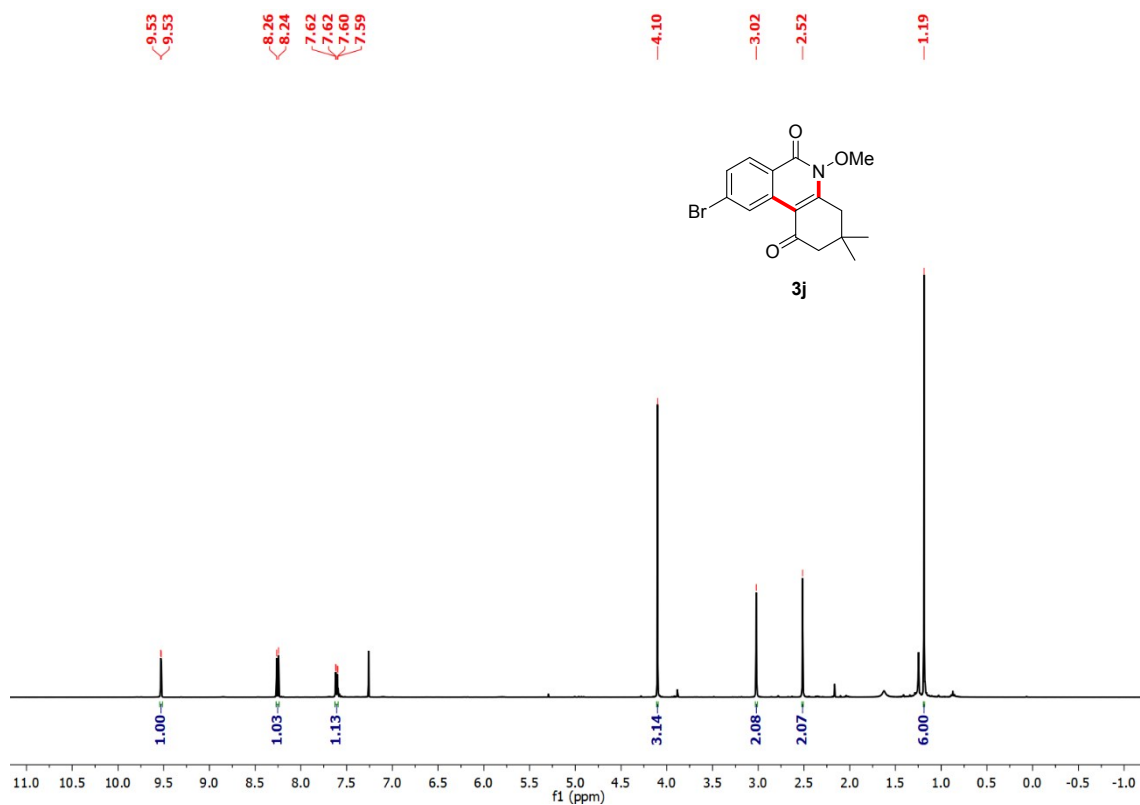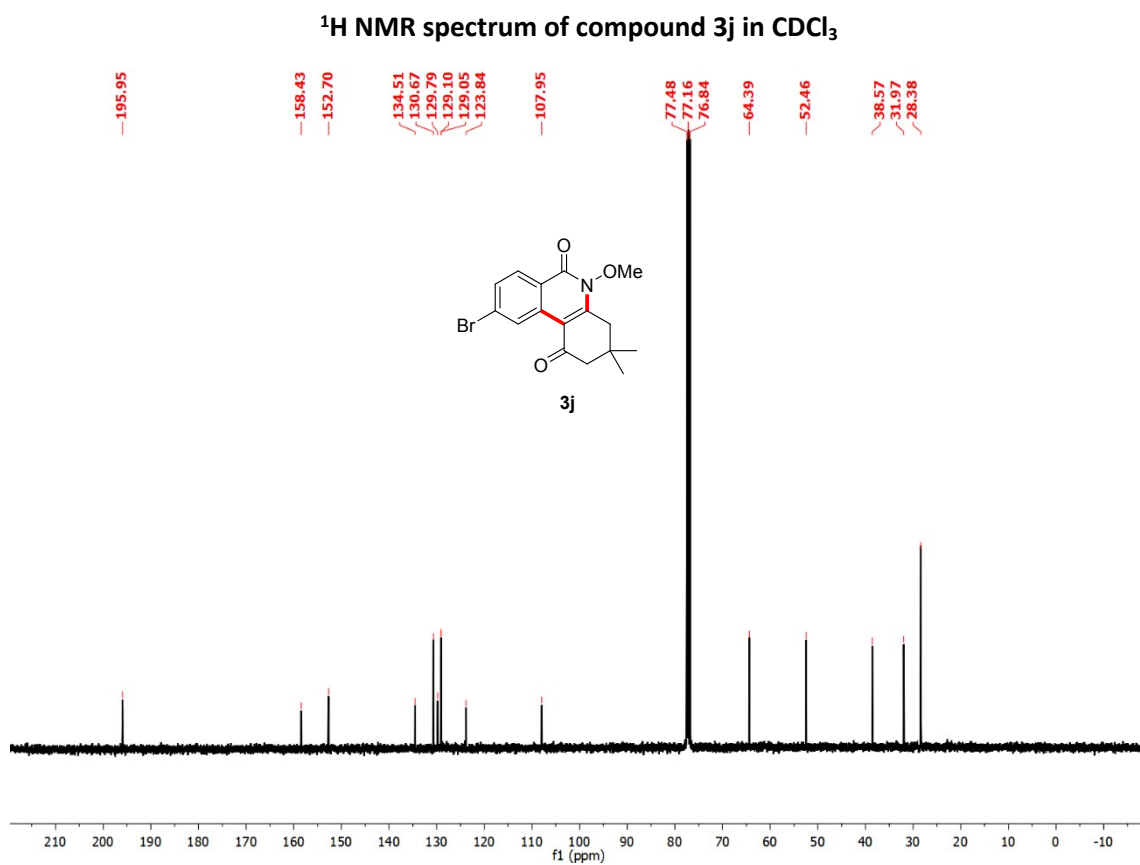

**<sup>13</sup>C NMR spectrum of compound 3j in CDCl<sub>3</sub>**

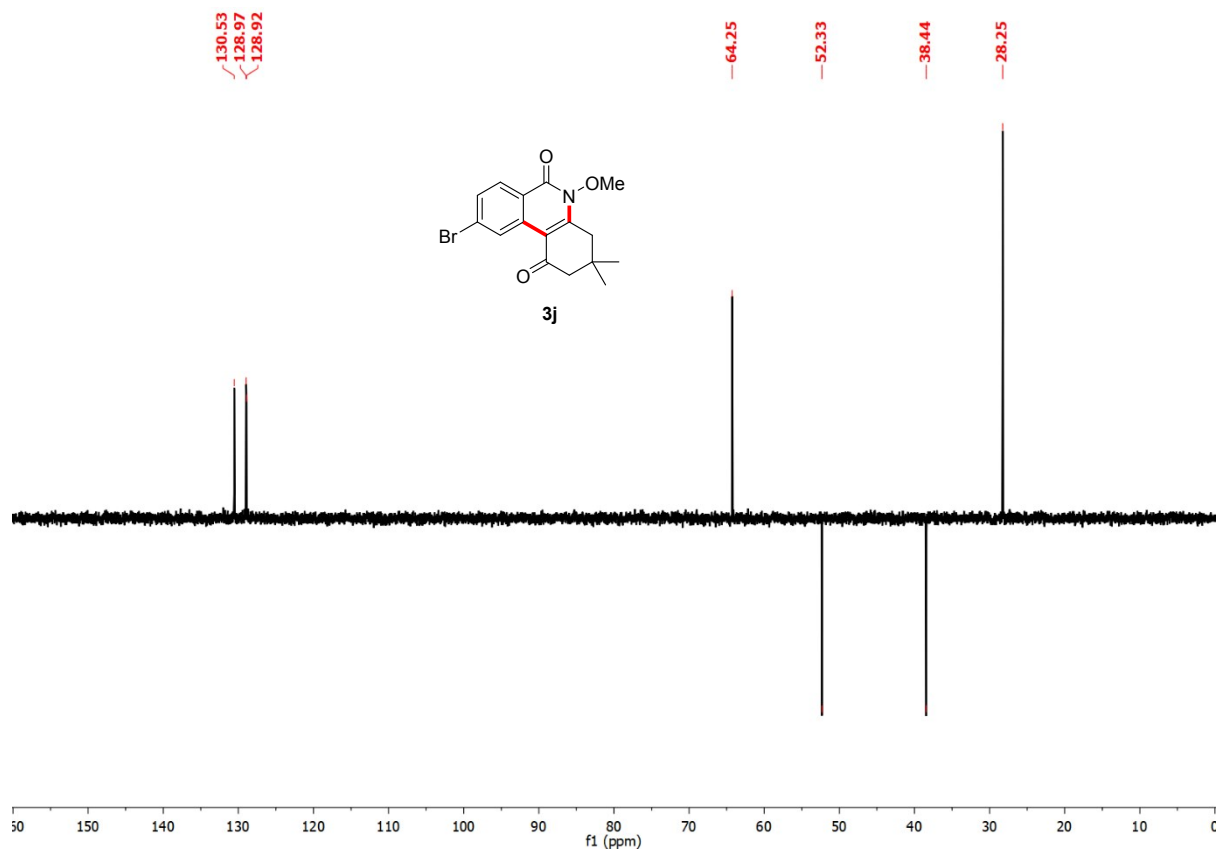

DEPT-135 NMR spectrum of compound 3j in CDCl<sub>3</sub>

# UOH -SCHOOL OF CHEMISTRY -HRMS

## Analysis Info

Analysis Name D:\Data\2018\PROF RNINOVIW-222.d  
Method tune\_low\_PosR.m  
Sample Name IW-222-MEOH  
Comment

Acquisition Date 11/9/2018 12:23:21 PM

Operator UOH-Chemistry  
Instrument maXis 10138

## Acquisition Parameter

|             |            |                       |           |                  |           |
|-------------|------------|-----------------------|-----------|------------------|-----------|
| Source Type | ESI        | Ion Polarity          | Positive  | Set Nebulizer    | 0.3 Bar   |
| Focus       | Not active | Set Capillary         | 2600 V    | Set Dry Heater   | 250 °C    |
| Scan Begin  | 100 m/z    | Set End Plate Offset  | -500 V    | Set Dry Gas      | 4.0 l/min |
| Scan End    | 2500 m/z   | Set Collision Cell RF | 150.0 Vpp | Set Divert Valve | Waste     |

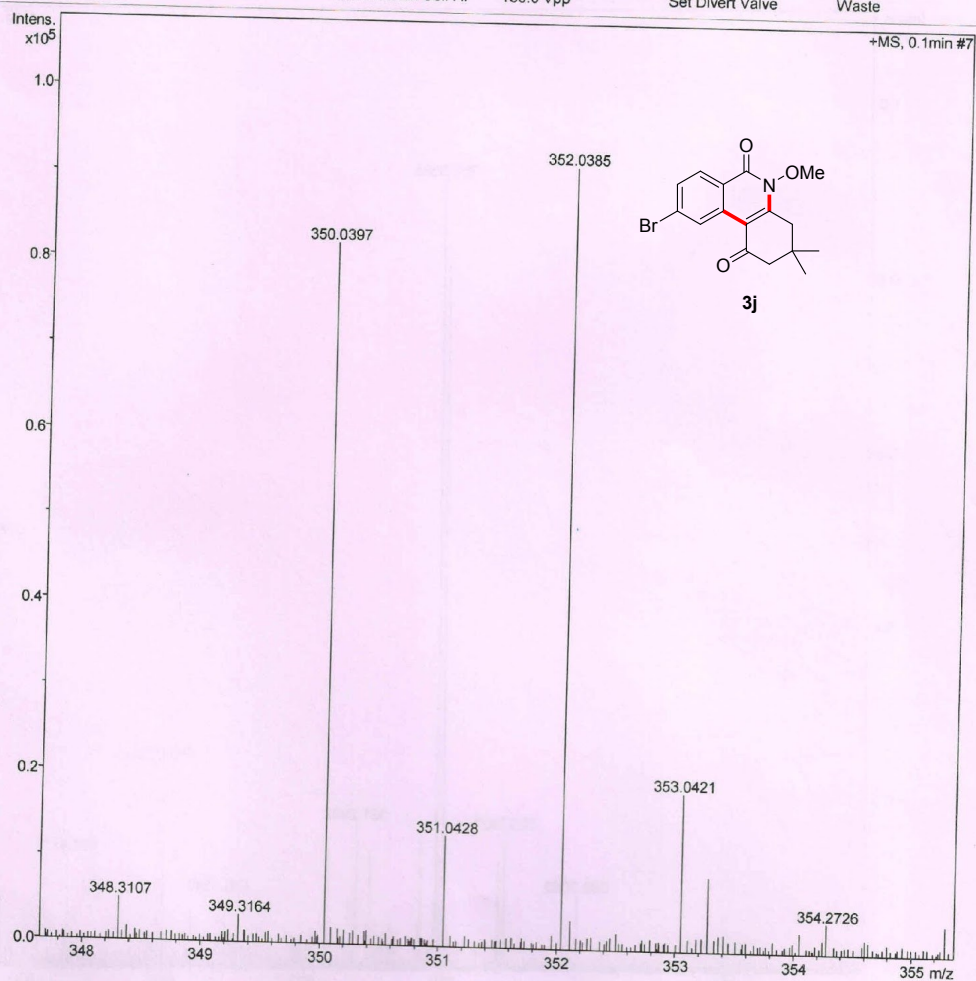

Bruker Compass DataAnalysis 4.0

printed: 11/9/2018 12:27:10 PM

Page 1 of 1

HRMS spectrum of compound 3j

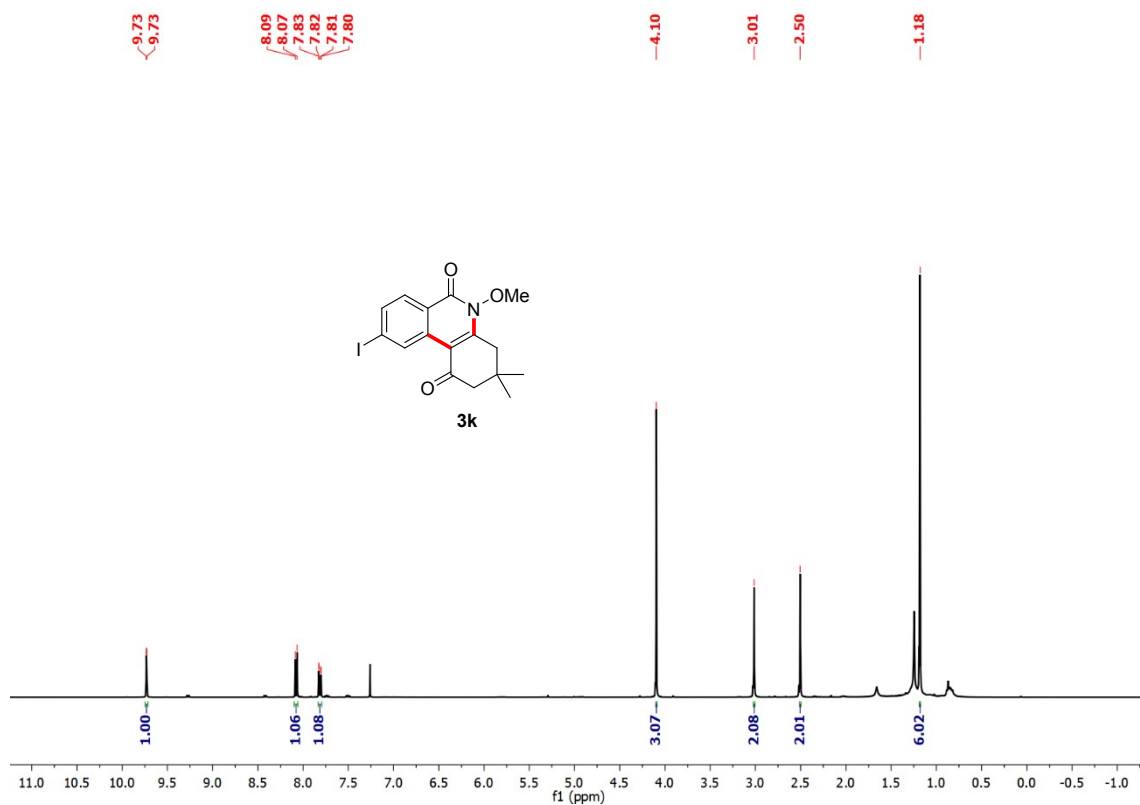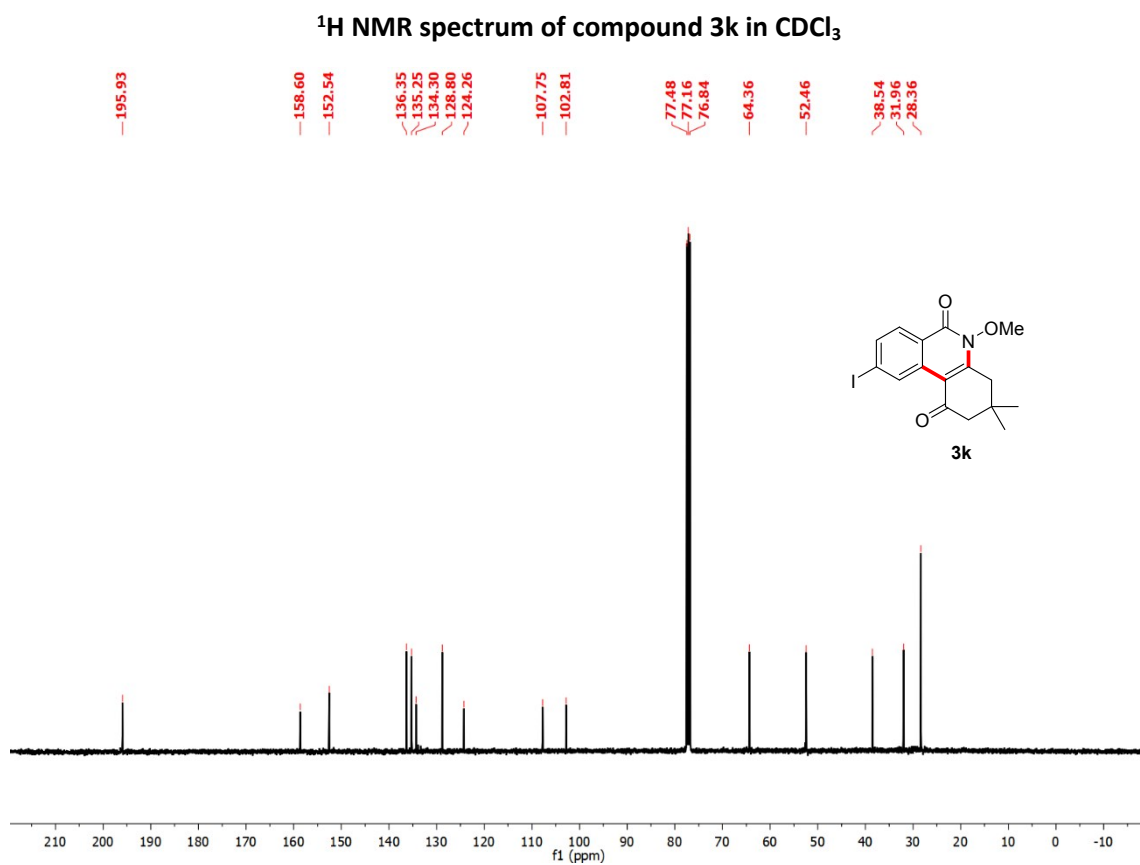

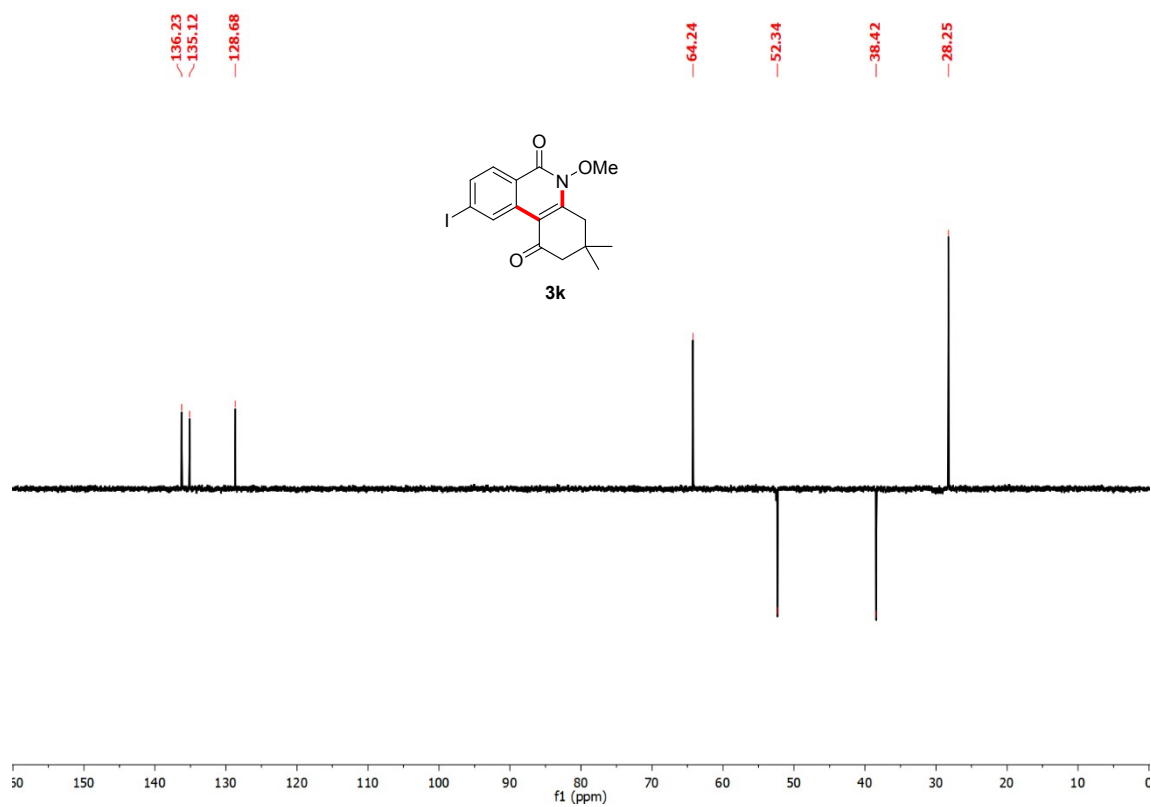

DEPT-135 NMR spectrum of compound 3k in CDCl<sub>3</sub>



# UOH -SCHOOL OF CHEMISTRY -HRMS

## Analysis Info

Analysis Name D:\Data\2018\PROF RNN\IWIW-223.d  
Method tune\_low\_PosR.m  
Sample Name IW-223-MEOH  
Comment

Acquisition Date 11/9/2018 12:37:29 PM

Operator UOH-Chemistry  
Instrument maXis 10138

## Acquisition Parameter

|             |            |                       |           |                  |           |
|-------------|------------|-----------------------|-----------|------------------|-----------|
| Source Type | ESI        | Ion Polarity          | Positive  | Set Nebulizer    | 0.3 Bar   |
| Focus       | Not active | Set Capillary         | 2600 V    | Set Dry Heater   | 250 °C    |
| Scan Begin  | 100 m/z    | Set End Plate Offset  | -500 V    | Set Dry Gas      | 4.0 l/min |
| Scan End    | 2500 m/z   | Set Collision Cell RF | 150.0 Vpp | Set Divert Valve | Waste     |

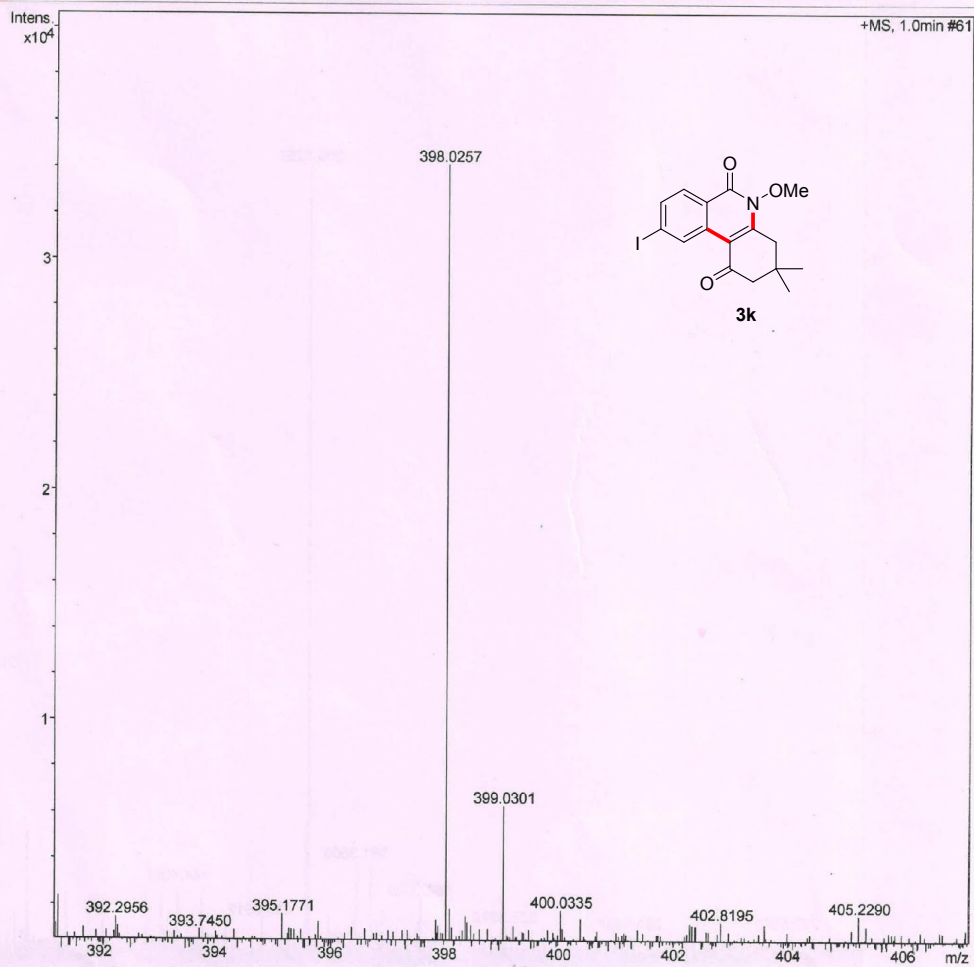

HRMS spectrum of compound 3k

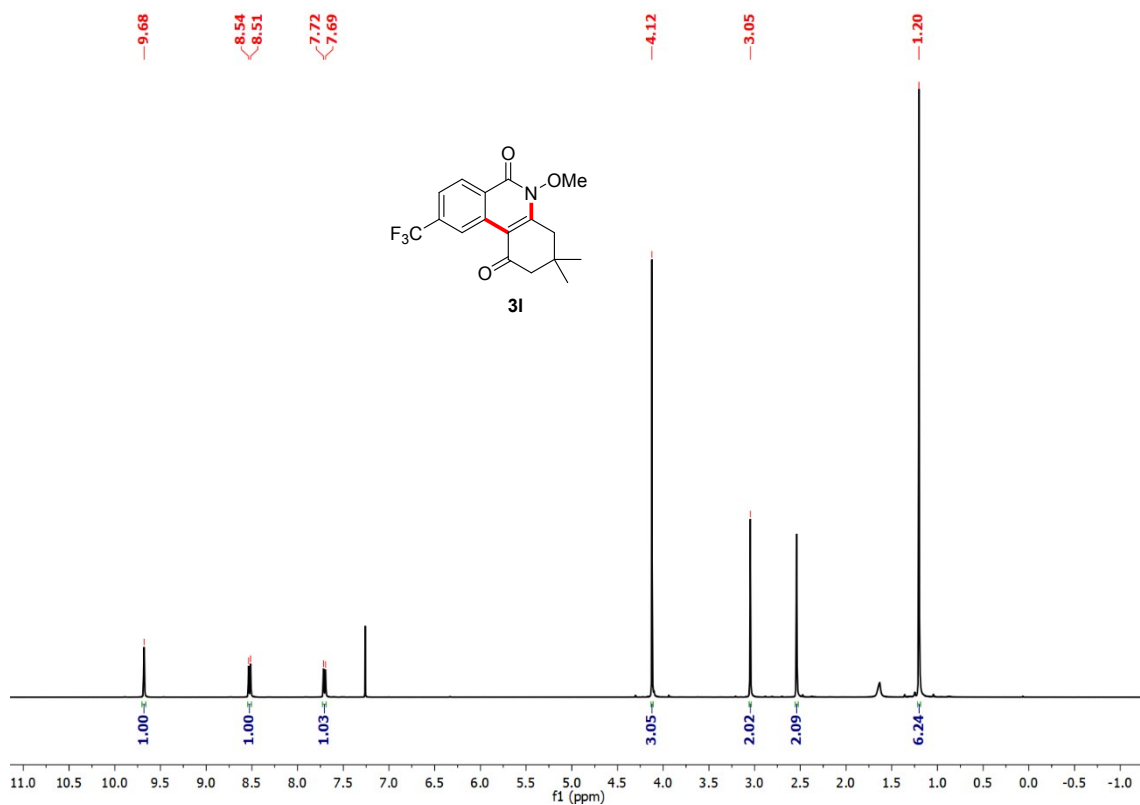

<sup>1</sup>H NMR spectrum of compound **3l** in CDCl<sub>3</sub>

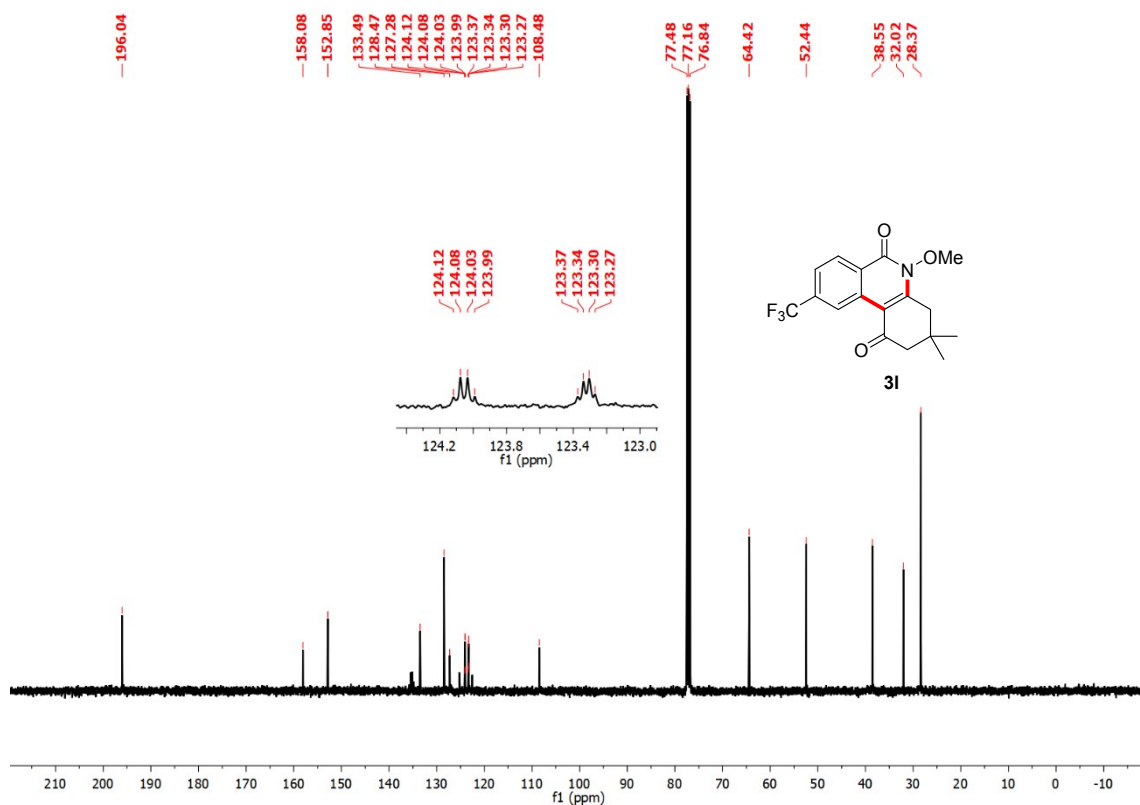

<sup>13</sup>C NMR spectrum of compound **3l** in CDCl<sub>3</sub>



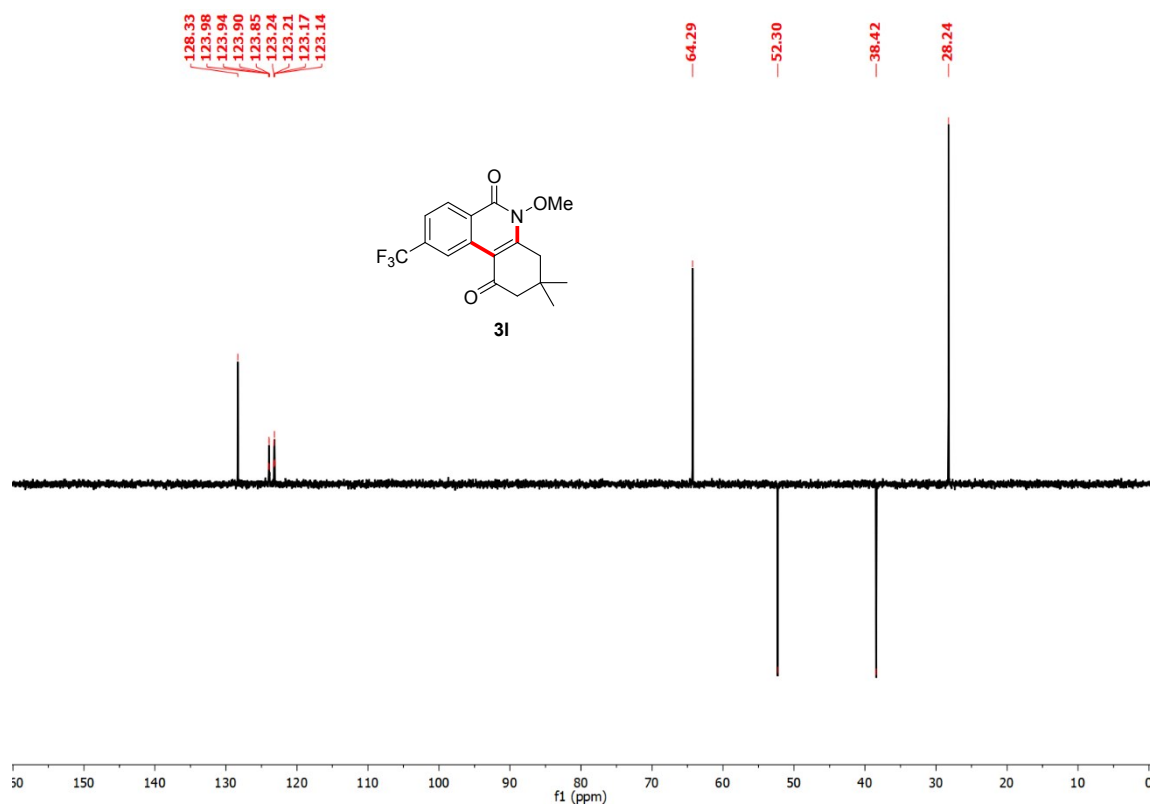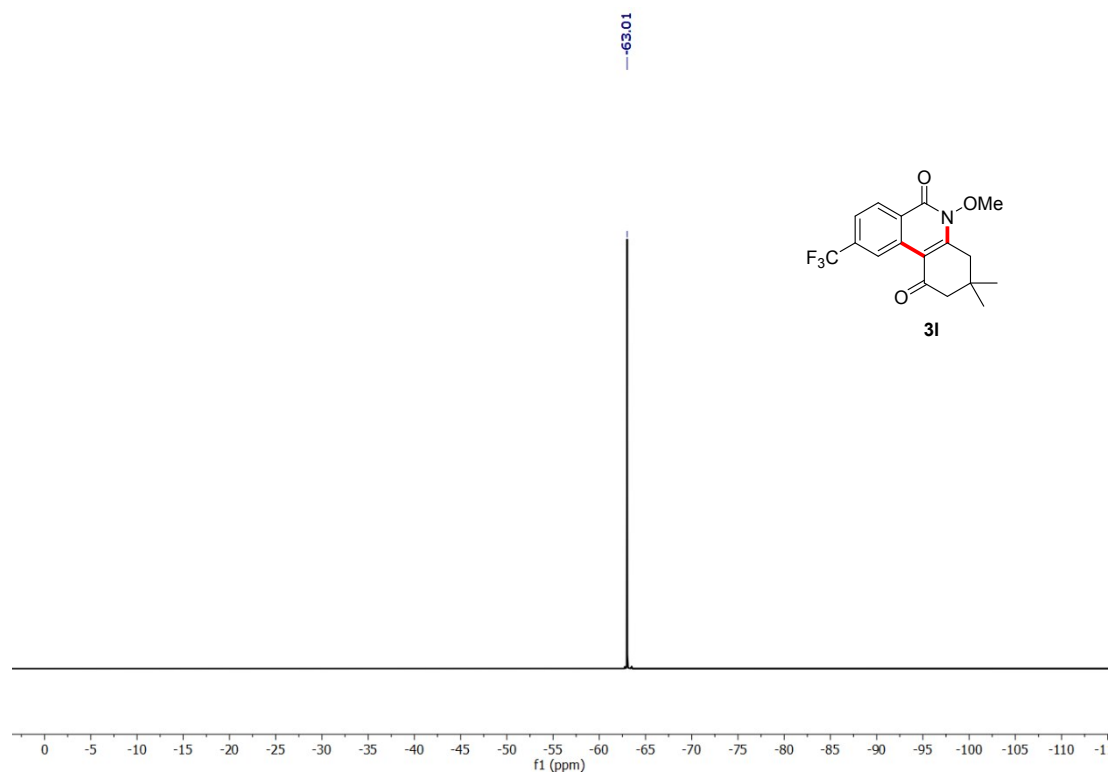

<sup>19</sup>F NMR spectrum of compound 31 in CDCl<sub>3</sub>

## UOH -SCHOOL OF CHEMISTRY -HRMS

### Analysis Info

Analysis Name D:\Data\2018\PROF RN\NOV\IW-227.d  
Method tune\_low.m  
Sample Name IW-227-CHCL3-ACN  
Comment

Acquisition Date 11/13/2018 11:03:48 AM

Operator UOH-Chemistry  
Instrument maXis 10138

### Acquisition Parameter

|             |            |                       |           |                  |           |
|-------------|------------|-----------------------|-----------|------------------|-----------|
| Source Type | ESI        | Ion Polarity          | Positive  | Set Nebulizer    | 0.4 Bar   |
| Focus       | Not active | Set Capillary         | 3300 V    | Set Dry Heater   | 200 °C    |
| Scan Begin  | 50 m/z     | Set End Plate Offset  | -500 V    | Set Dry Gas      | 6.0 l/min |
| Scan End    | 1800 m/z   | Set Collision Cell RF | 350.0 Vpp | Set Divert Valve | Waste     |

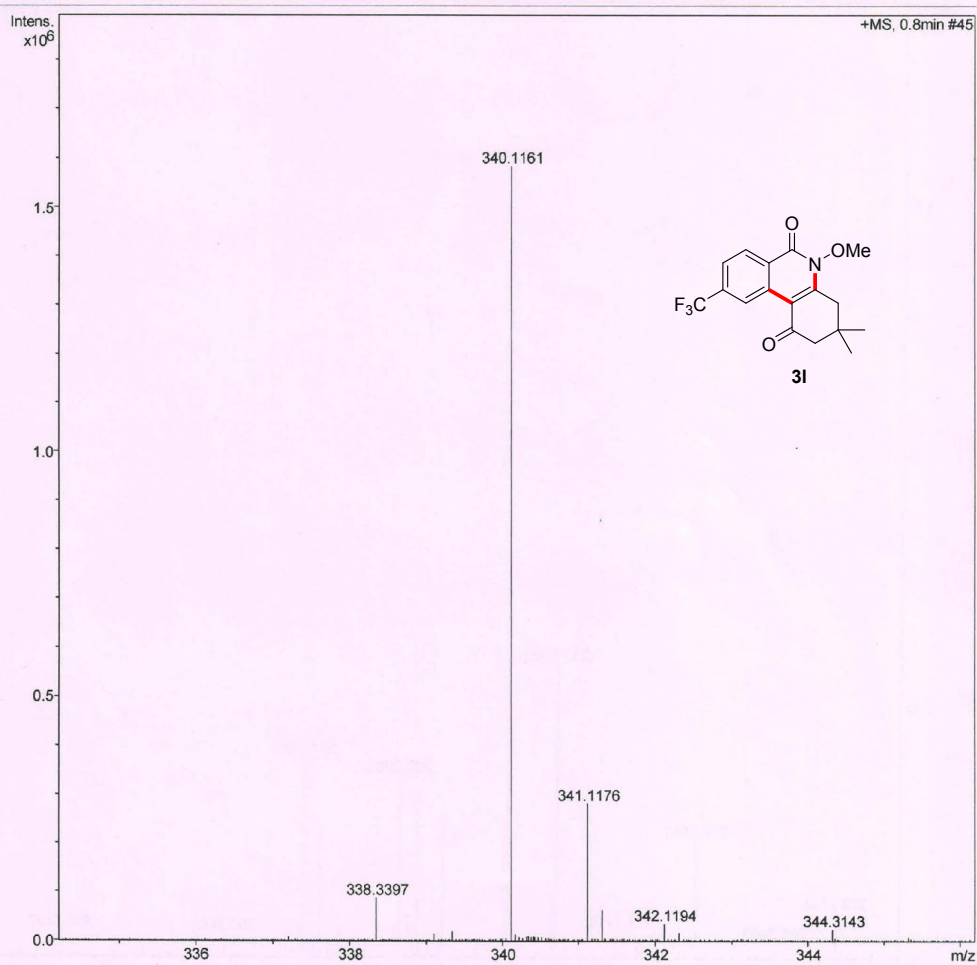

HRMS spectrum of compound 3I

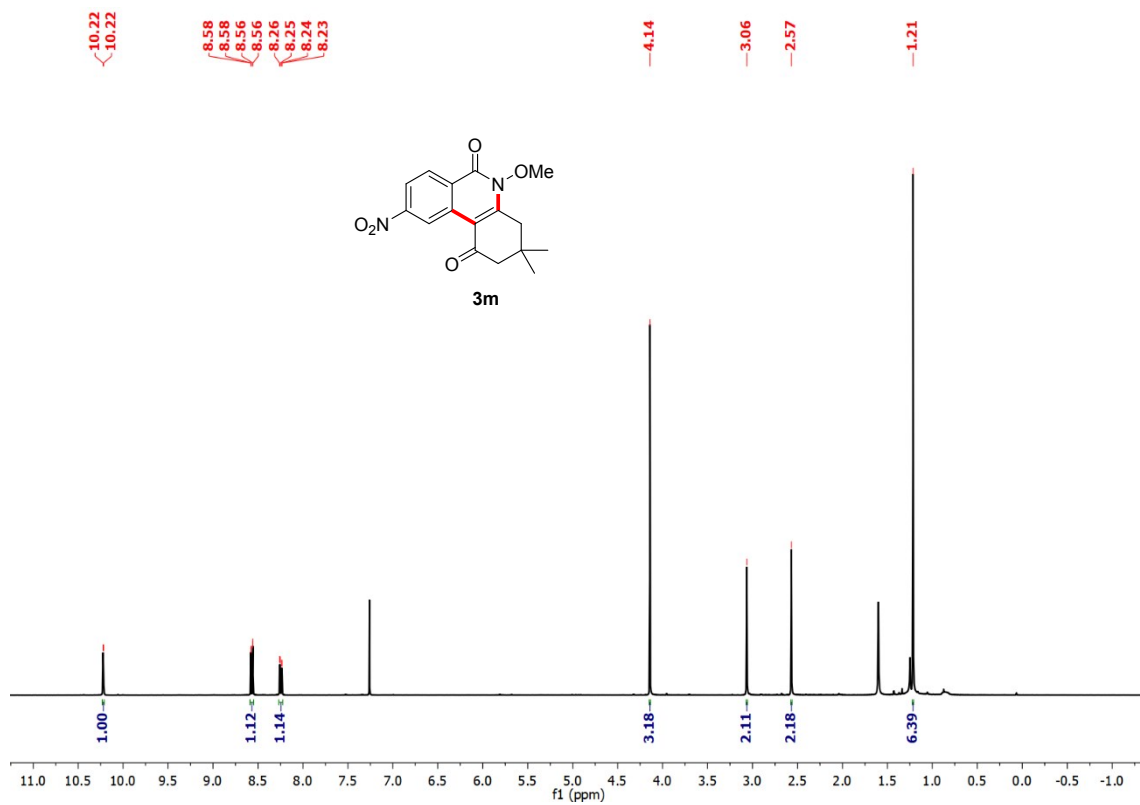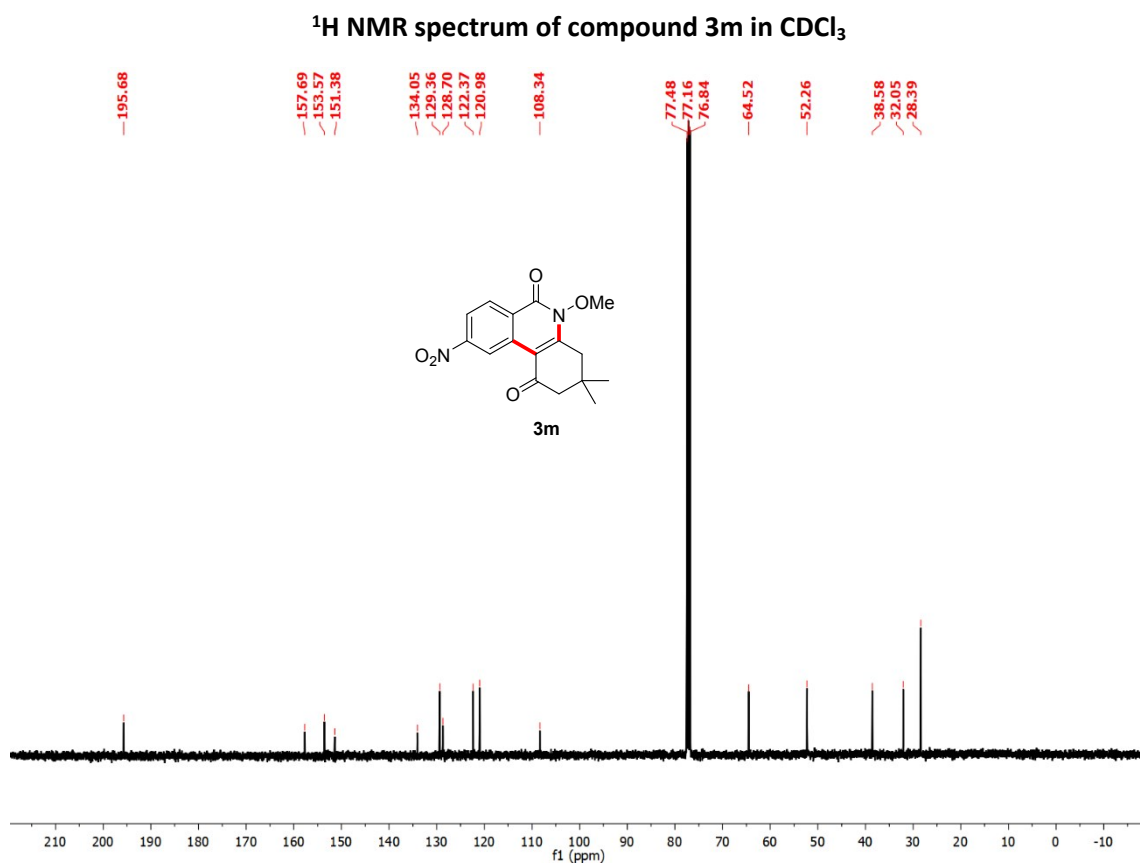

**<sup>13</sup>C NMR spectrum of compound 3m in CDCl<sub>3</sub>**

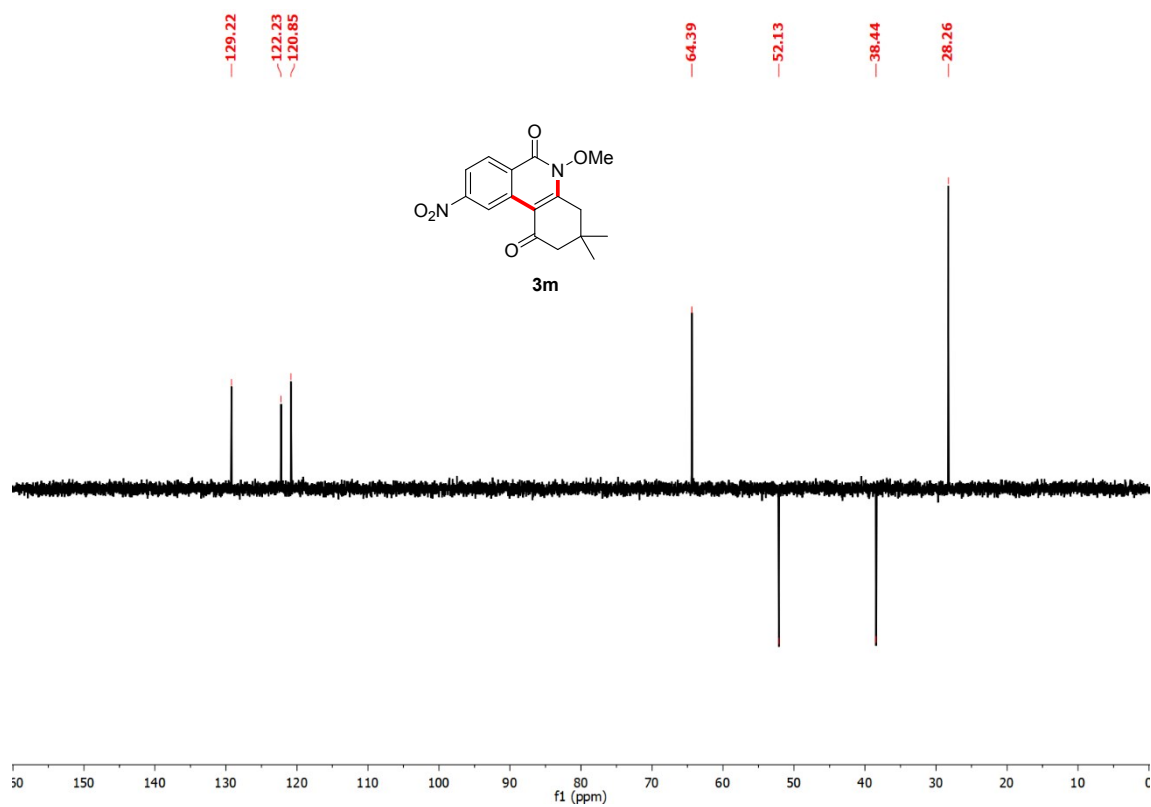

DEPT-135 NMR spectrum of compound 3m in CDCl<sub>3</sub>

# UOH -SCHOOL OF CHEMISTRY -HRMS

## Analysis Info

Analysis Name D:\Data\2018\PROF RNN\I\W-228.d  
Method tune\_low.m  
Sample Name IW-228-CHCL3-ACN  
Comment

Acquisition Date 11/13/2018 10:55:17 AM

Operator UOH-Chemistry  
Instrument maXis 10138

## Acquisition Parameter

|             |            |                       |           |                  |           |
|-------------|------------|-----------------------|-----------|------------------|-----------|
| Source Type | ESI        | Ion Polarity          | Positive  | Set Nebulizer    | 0.4 Bar   |
| Focus       | Not active | Set Capillary         | 3300 V    | Set Dry Heater   | 200 °C    |
| Scan Begin  | 50 m/z     | Set End Plate Offset  | -500 V    | Set Dry Gas      | 6.0 l/min |
| Scan End    | 1800 m/z   | Set Collision Cell RF | 350.0 Vpp | Set Divert Valve | Waste     |

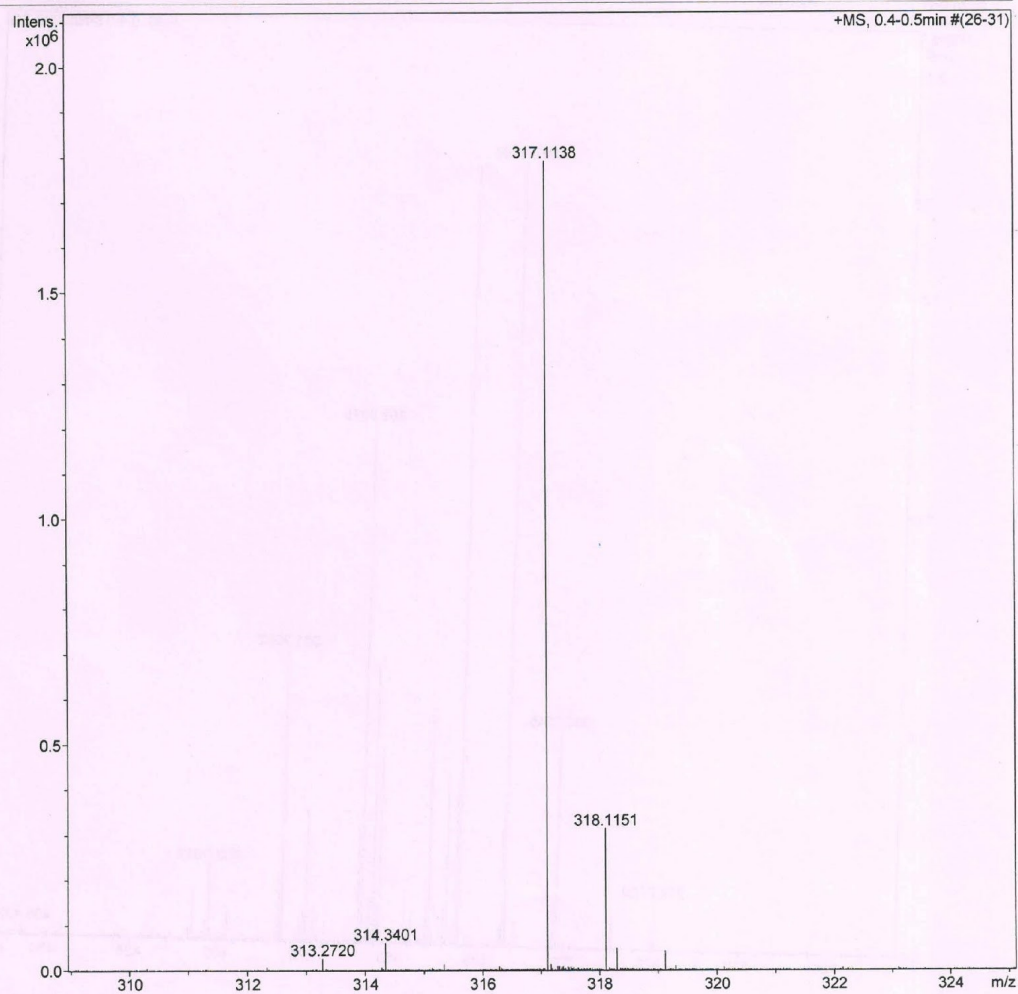

HRMS spectrum of compound 3m

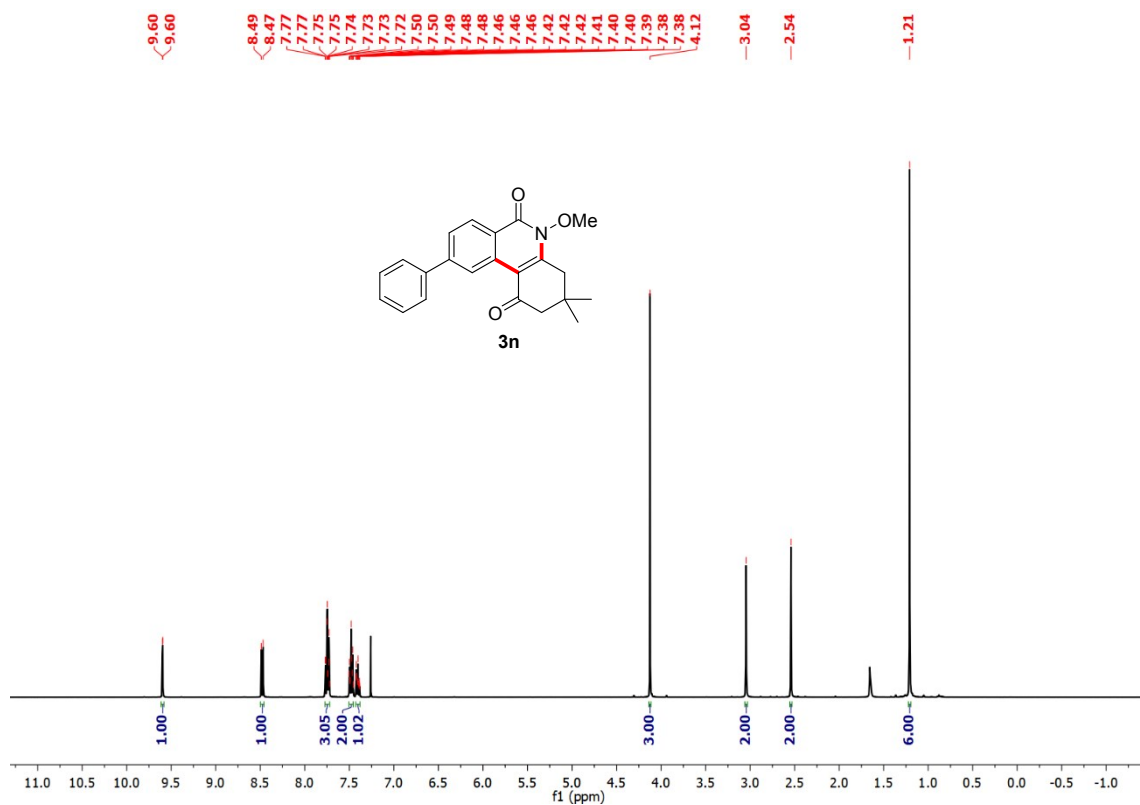

<sup>1</sup>H NMR spectrum of compound 3n in CDCl<sub>3</sub>

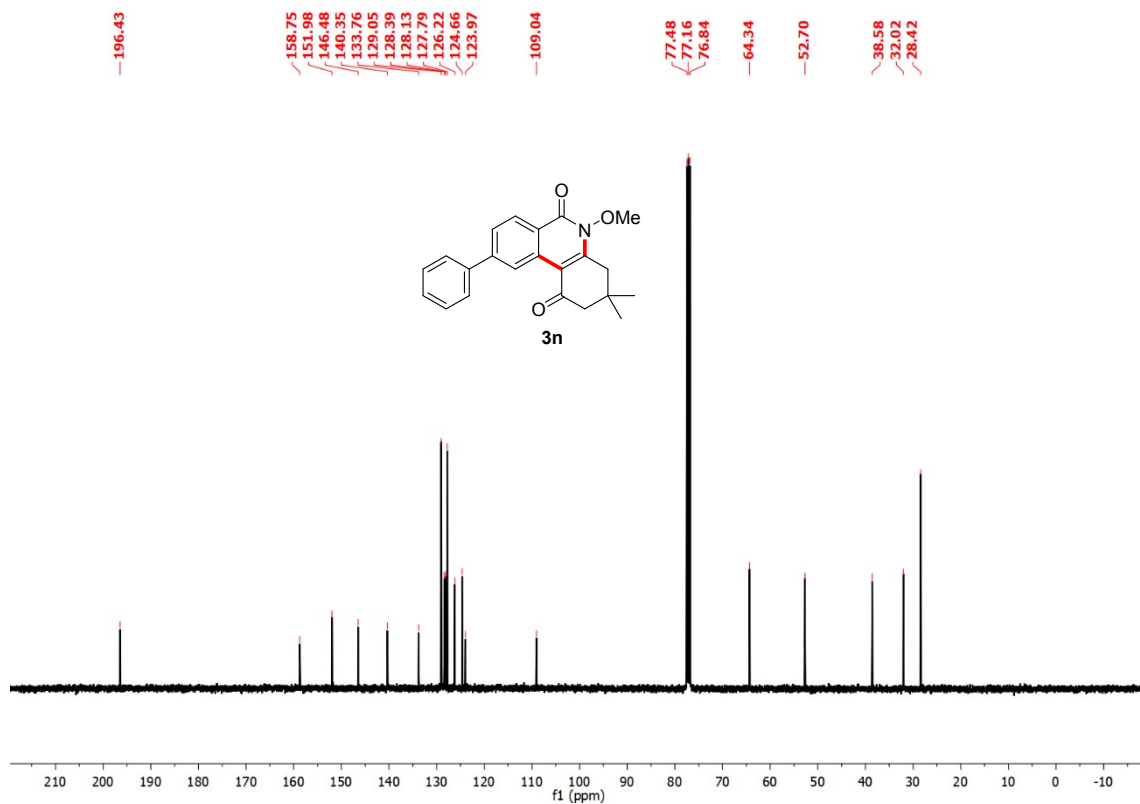

<sup>13</sup>C NMR spectrum of compound 3n in CDCl<sub>3</sub>

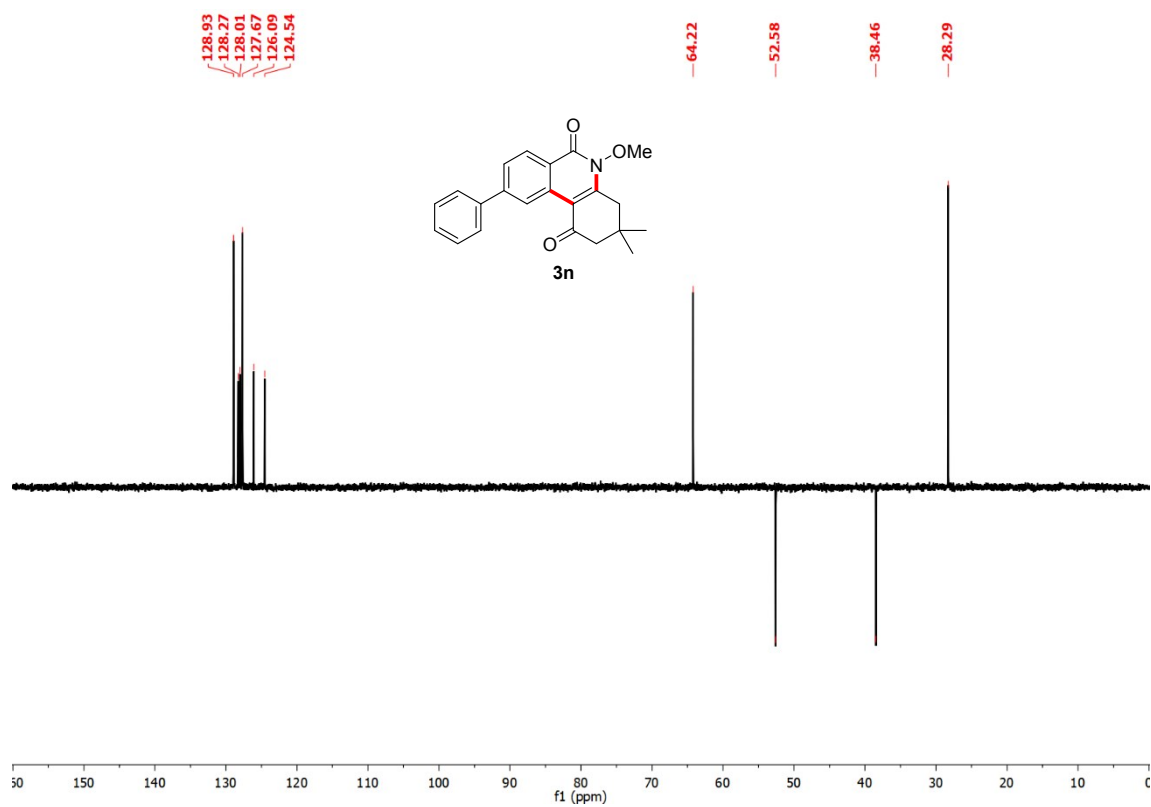

DEPT-135 NMR spectrum of compound 3n in CDCl<sub>3</sub>



# UOH -SCHOOL OF CHEMISTRY -HRMS

## Analysis Info

Analysis Name D:\Data\2018\PROF RN\NOV\IW-229.d  
Method tune\_low.m  
Sample Name IW-229-CHCL3-ACN  
Comment

Acquisition Date 11/13/2018 11:41:53 AM

Operator UOH-Chemistry  
Instrument maXis 10138

## Acquisition Parameter

|             |            |                       |           |                  |           |
|-------------|------------|-----------------------|-----------|------------------|-----------|
| Source Type | ESI        | Ion Polarity          | Positive  | Set Nebulizer    | 0.4 Bar   |
| Focus       | Not active | Set Capillary         | 3300 V    | Set Dry Heater   | 200 °C    |
| Scan Begin  | 50 m/z     | Set End Plate Offset  | -500 V    | Set Dry Gas      | 6.0 l/min |
| Scan End    | 1800 m/z   | Set Collision Cell RF | 350.0 Vpp | Set Divert Valve | Waste     |

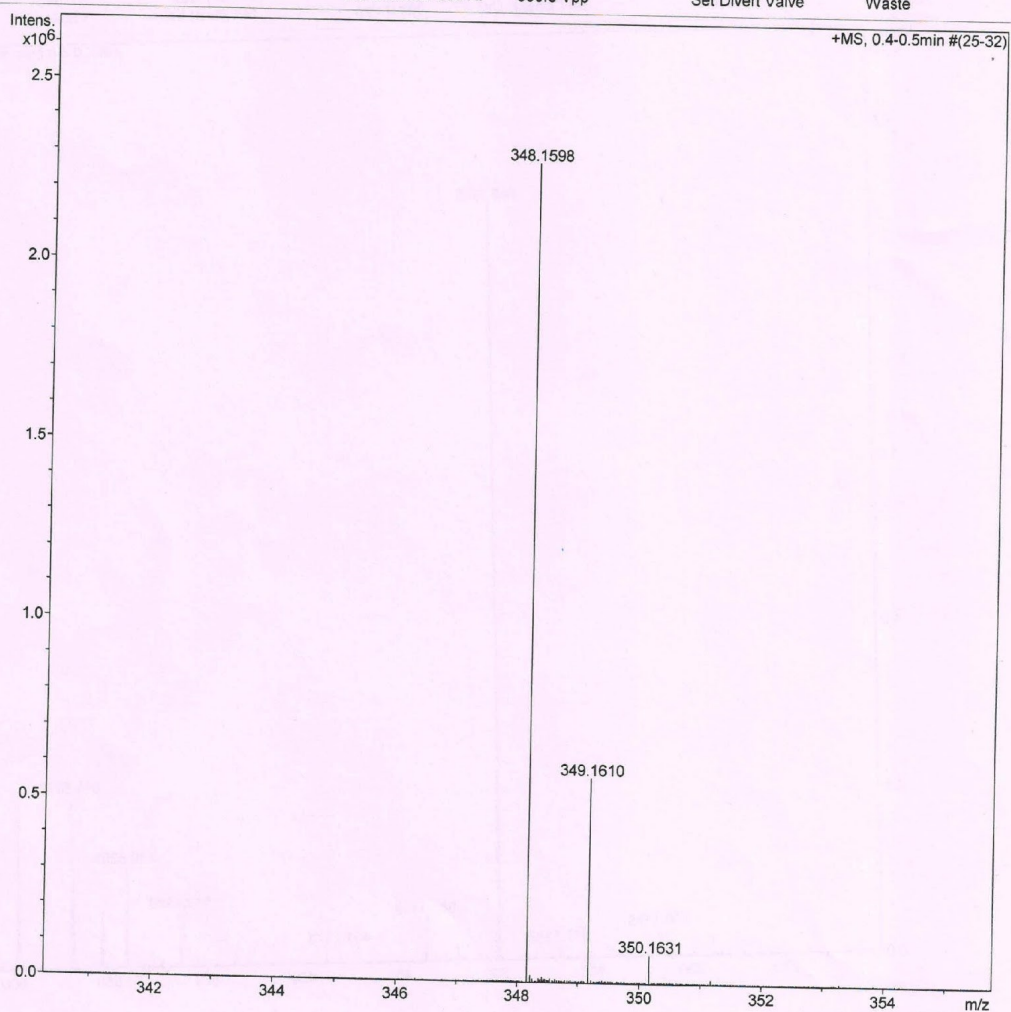

HRMS spectrum of compound 3n



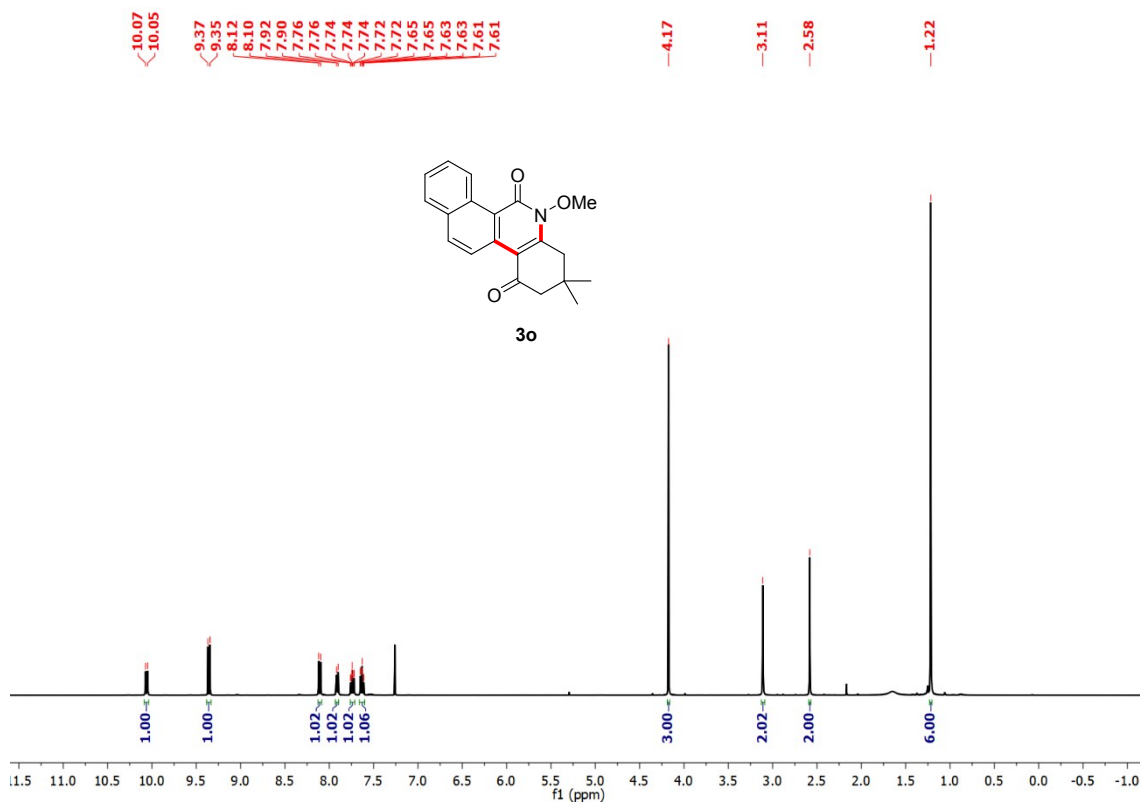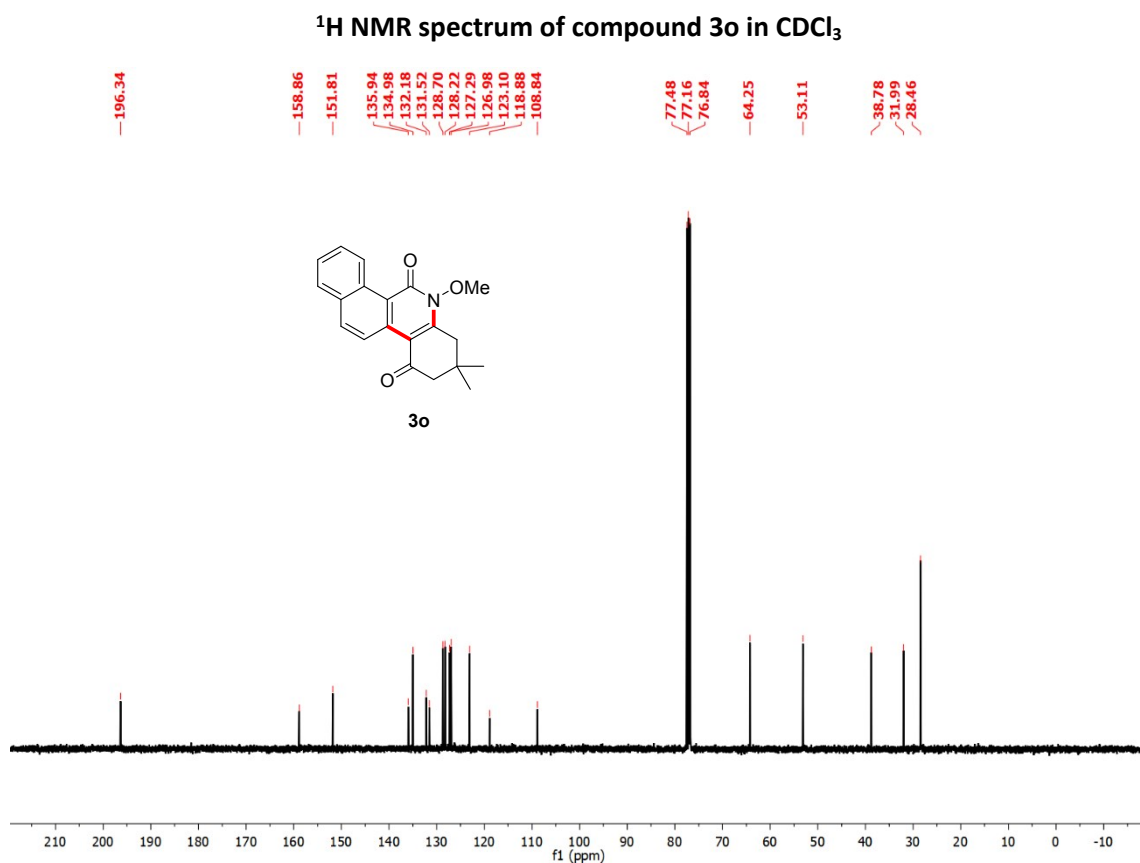

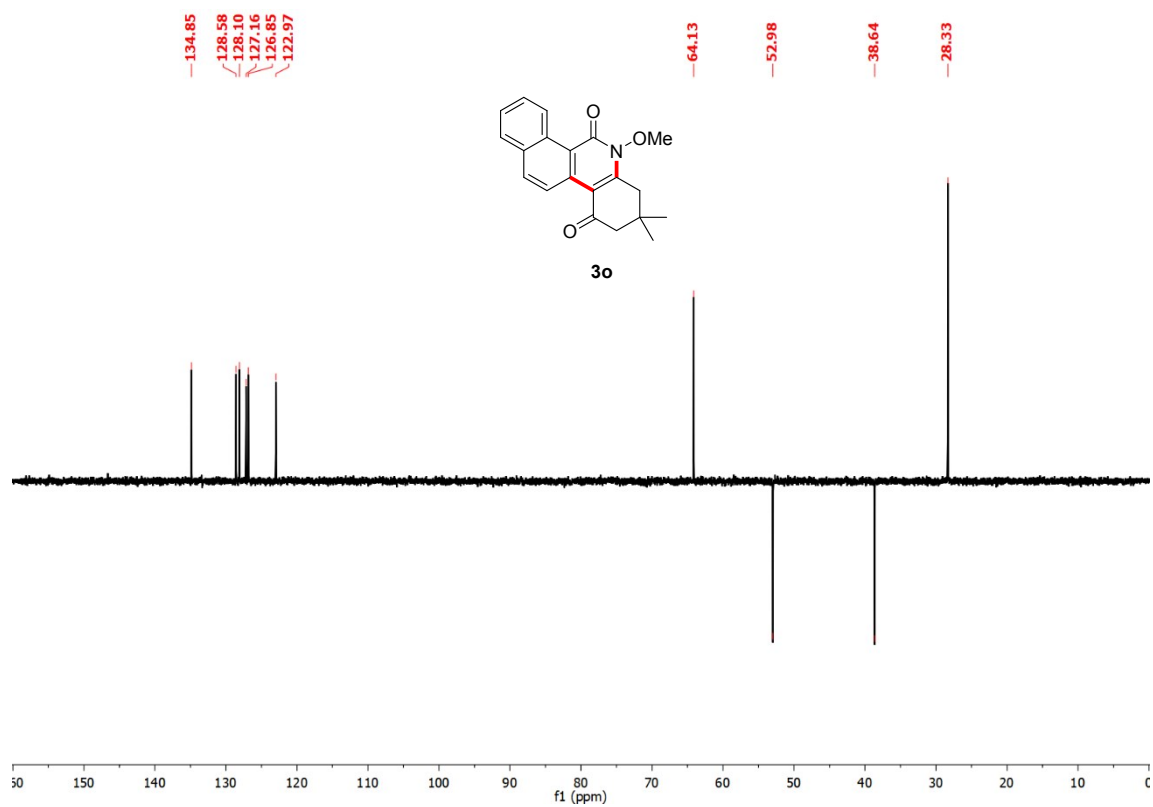

DEPT-135 NMR spectrum of compound 3o in CDCl<sub>3</sub>

UOH -SCHOOL OF CHEMISTRY -HRMS

Analysis Info

Analysis Name D:\Data\2018\PROF RN\DEC\NB-231.d  
Method tune\_low.m  
Sample Name NAGYL-3130-MEOH  
Comment NB-231

Acquisition Date 12/28/2018 11:07:56 AM

Operator UOH-Chemistry  
Instrument maXis 10138

Acquisition Parameter

|             |            |                       |           |                  |           |
|-------------|------------|-----------------------|-----------|------------------|-----------|
| Source Type | ESI        | Ion Polarity          | Positive  | Set Nebulizer    | 0.4 Bar   |
| Focus       | Not active | Set Capillary         | 2800 V    | Set Dry Heater   | 200 °C    |
| Scan Begin  | 50 m/z     | Set End Plate Offset  | -500 V    | Set Dry Gas      | 6.0 l/min |
| Scan End    | 1800 m/z   | Set Collision Cell RF | 350.0 Vpp | Set Divert Valve | Waste     |

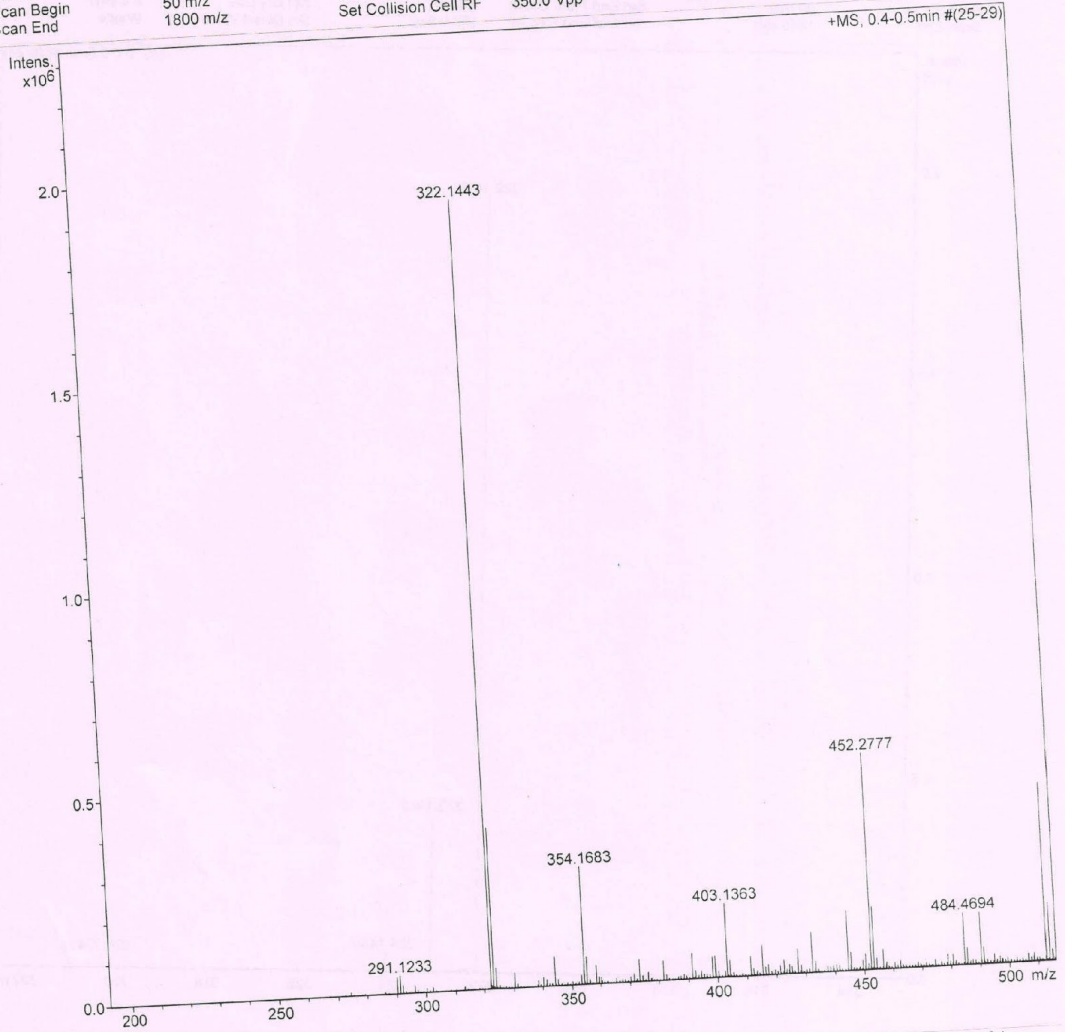

HRMS spectrum of compound 3o

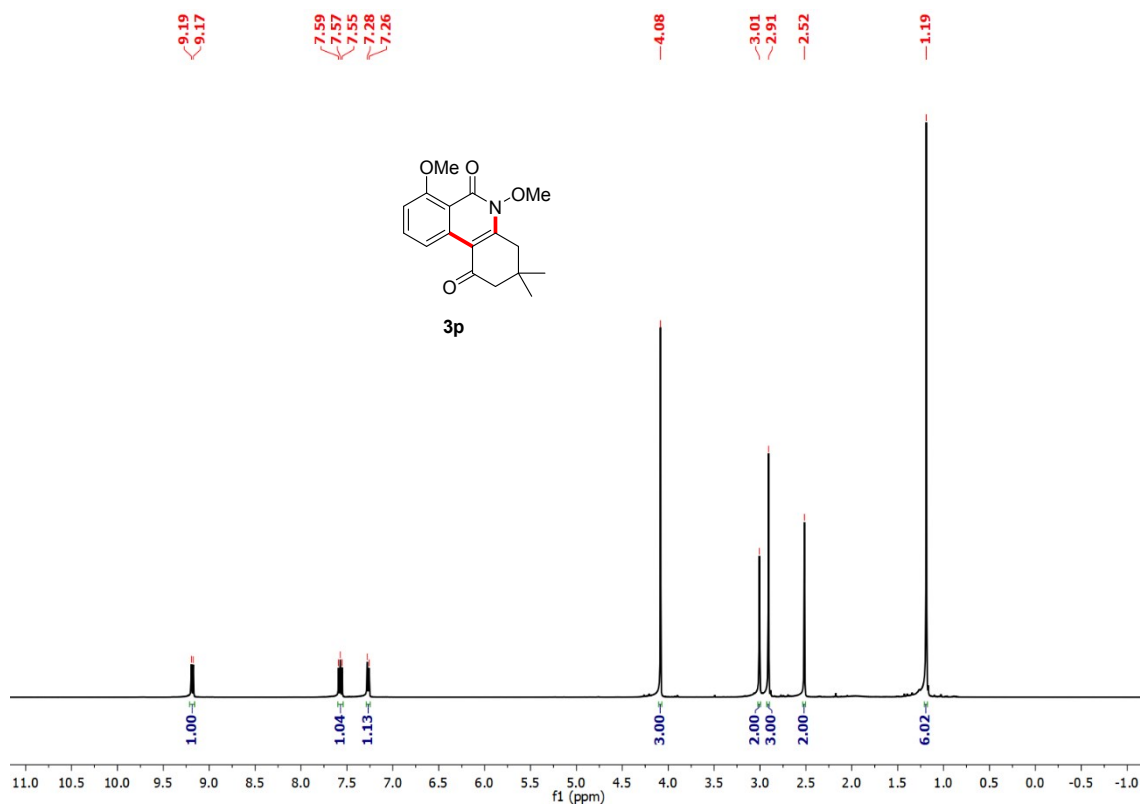

<sup>1</sup>H NMR spectrum of compound 3p in CDCl<sub>3</sub>

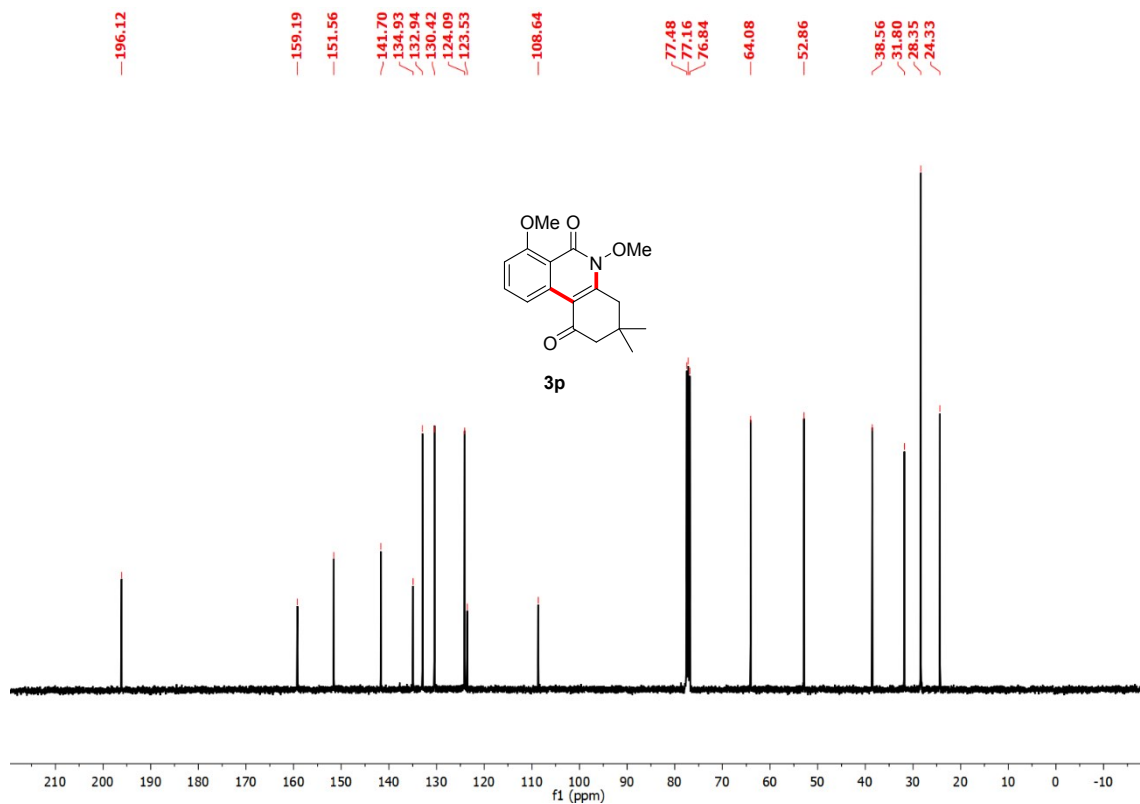

<sup>13</sup>C NMR spectrum of compound 3p in CDCl<sub>3</sub>

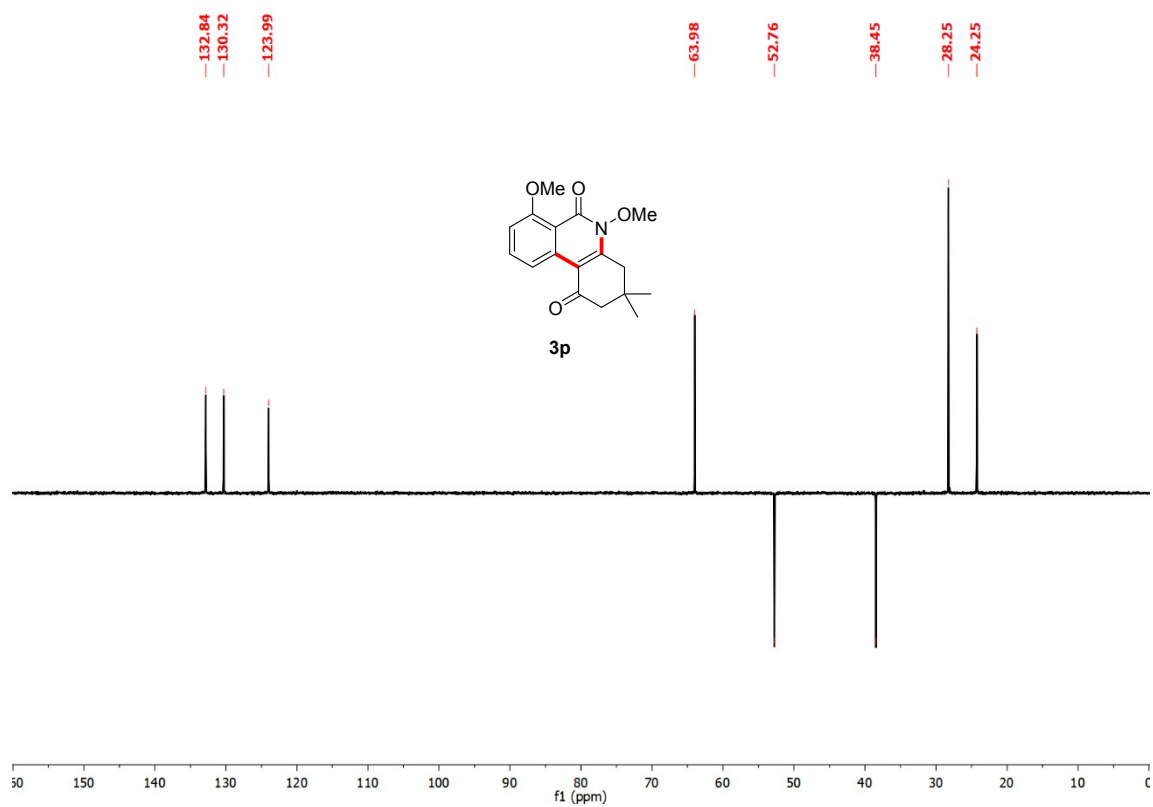

DEPT-135 NMR spectrum of compound 3p in CDCl<sub>3</sub>

UOH -SCHOOL OF CHEMISTRY -HRMS

Analysis Info

Analysis Name D:\Data\2018\PROF RN\NOV\ASB-72.d  
 Method tune\_low\_Pos-R2.m  
 Sample Name ASB-72  
 Comment

Acquisition Date 12/3/2018 7:00:37 PM

Operator UOH-Chemistry  
 Instrument maXis 10138

Acquisition Parameter

|             |            |                       |           |                  |           |
|-------------|------------|-----------------------|-----------|------------------|-----------|
| Source Type | ESI        | Ion Polarity          | Positive  | Set Nebulizer    | 0.3 Bar   |
| Focus       | Not active | Set Capillary         | 4200 V    | Set Dry Heater   | 180 °C    |
| Scan Begin  | 50 m/z     | Set End Plate Offset  | -500 V    | Set Dry Gas      | 4.0 l/min |
| Scan End    | 2580 m/z   | Set Collision Cell RF | 350.0 Vpp | Set Divert Valve | Waste     |

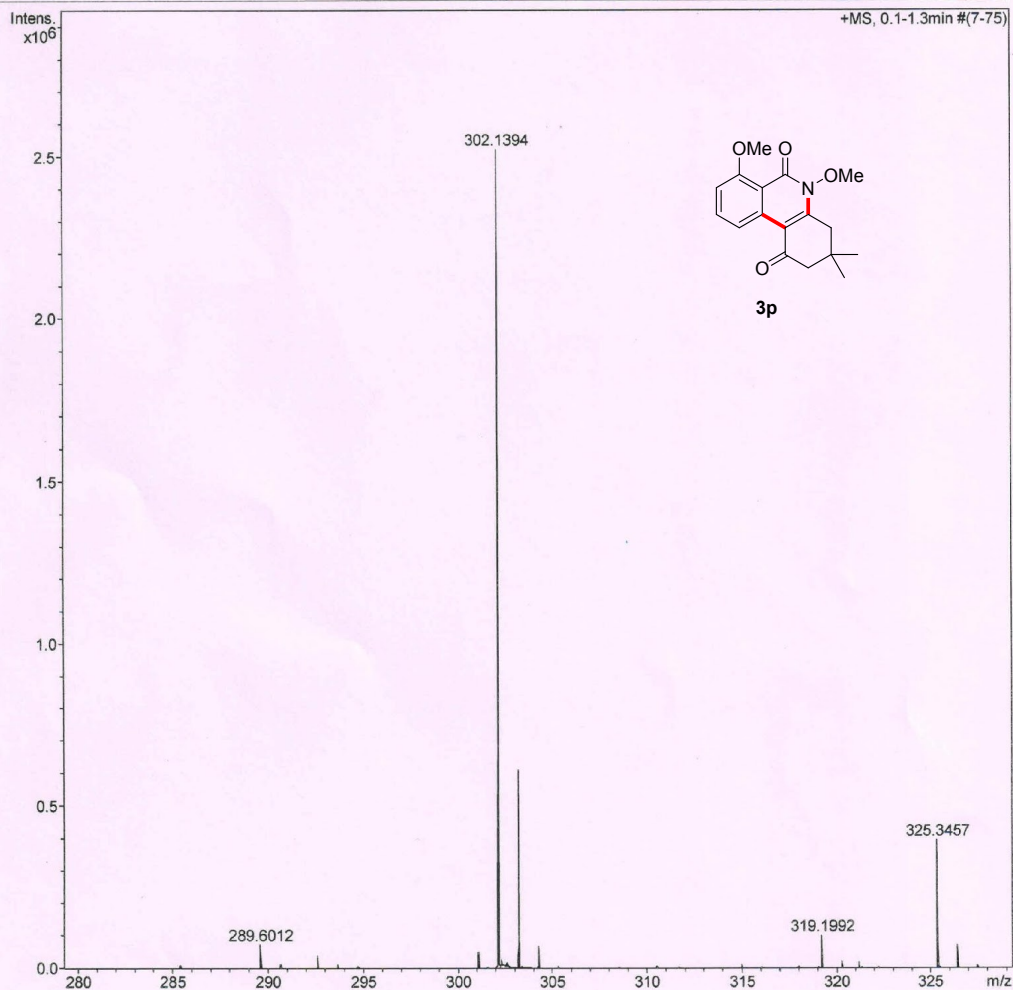

HRMS spectrum of compound 3p

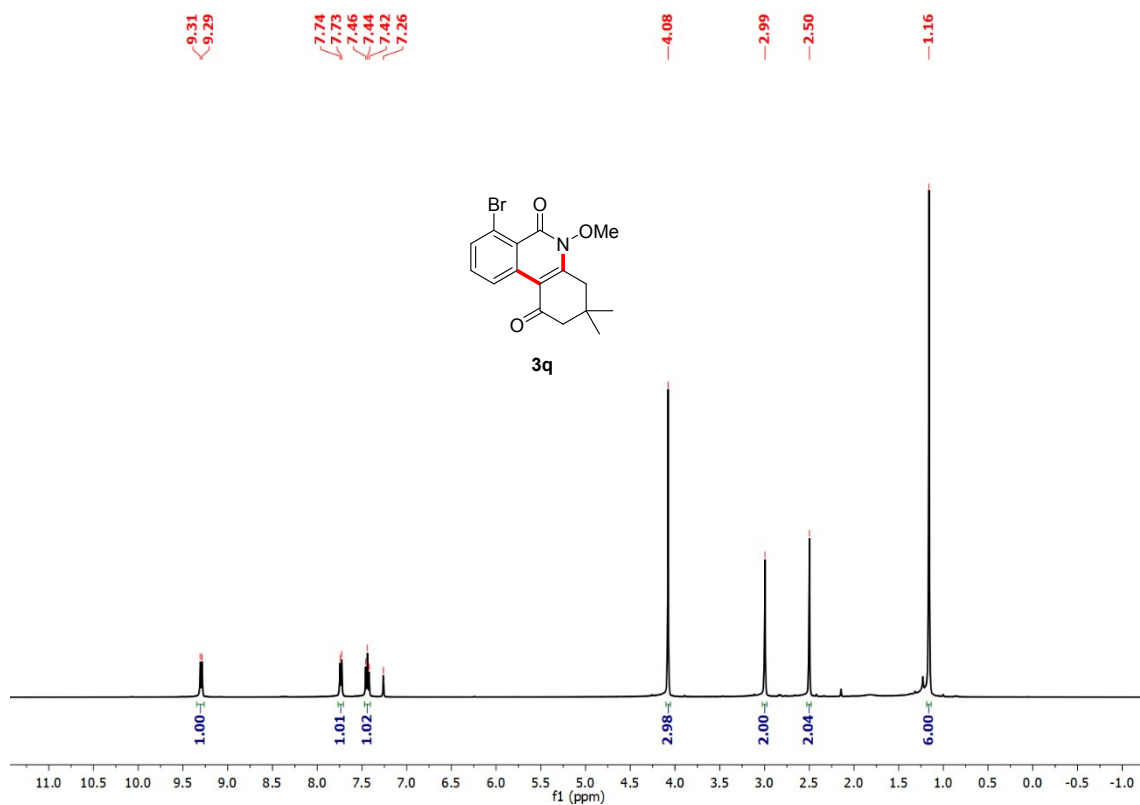

<sup>1</sup>H NMR spectrum of compound 3q in CDCl<sub>3</sub>

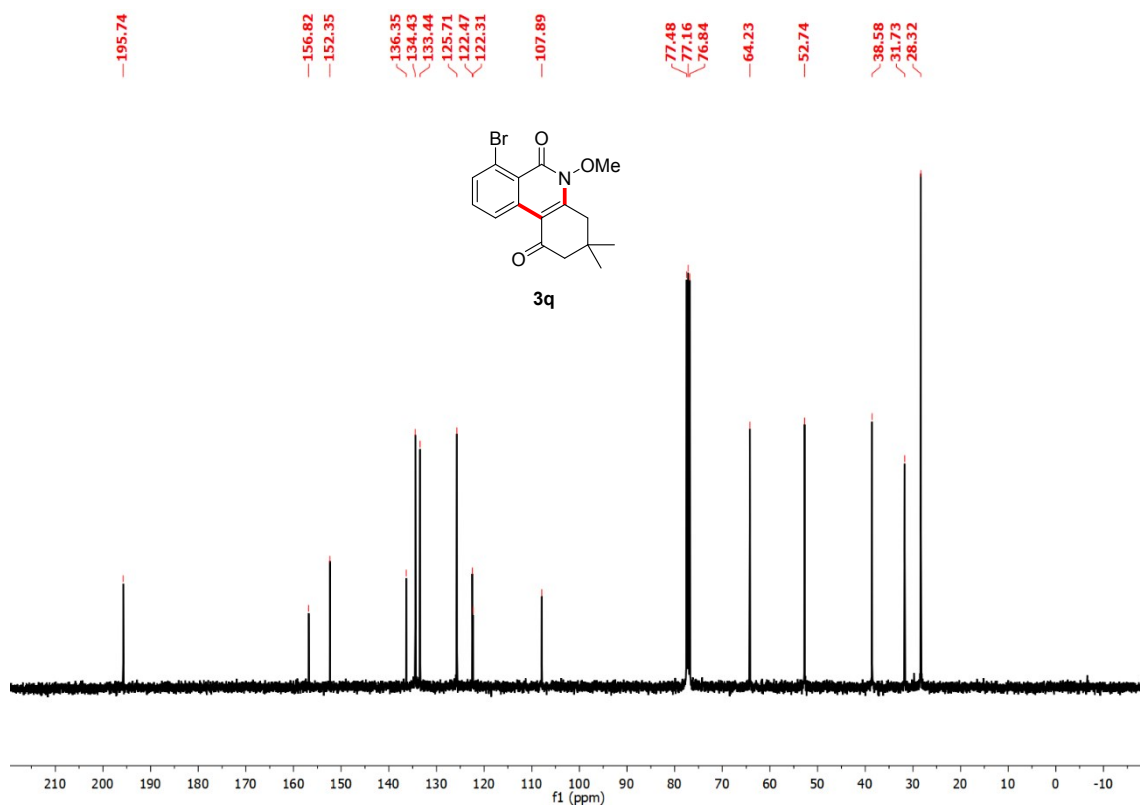

<sup>13</sup>C NMR spectrum of compound 3q in CDCl<sub>3</sub>

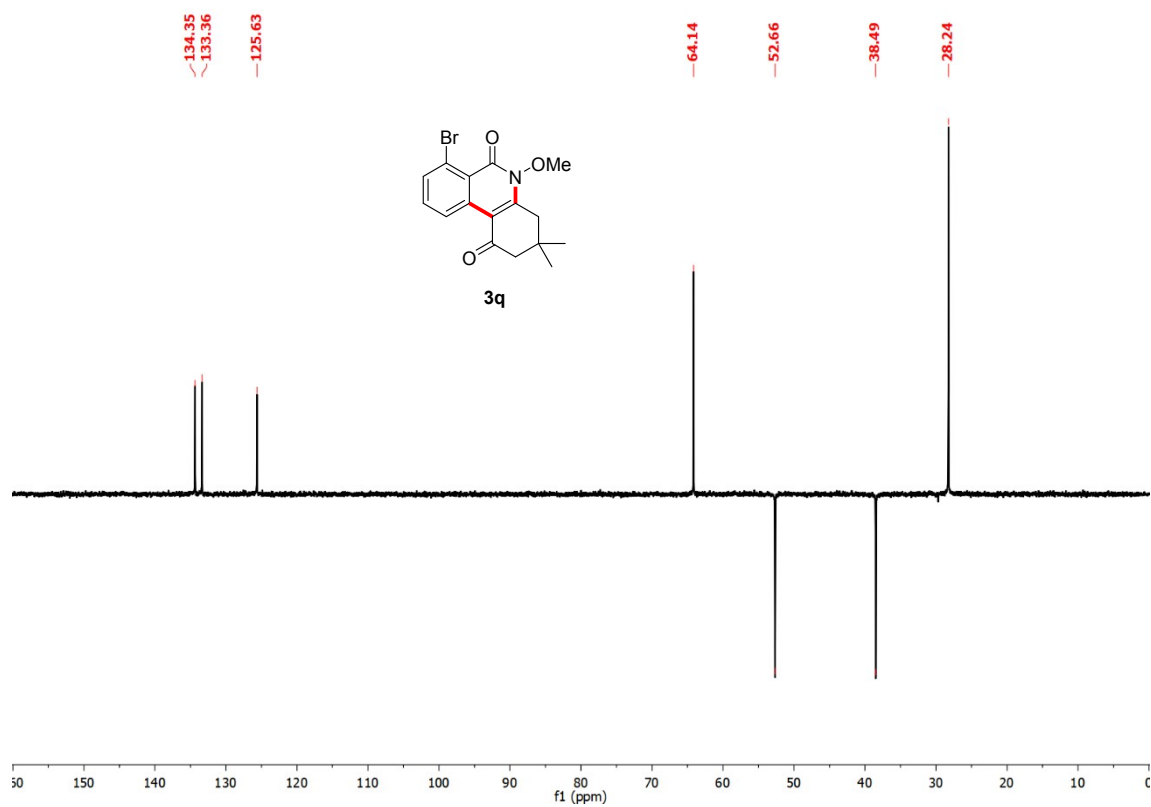

DEPT-135 NMR spectrum of compound 3q in CDCl<sub>3</sub>



# UOH -SCHOOL OF CHEMISTRY -HRMS

## Analysis Info

Analysis Name D:\Data\2018\PROF RNINOVASB-73.d  
Method tune\_low.m  
Sample Name ASB-73  
Comment

Acquisition Date 12/3/2018 6:42:52 PM

Operator UOH-Chemistry  
Instrument maXis 10138

## Acquisition Parameter

|             |            |                       |           |                  |           |
|-------------|------------|-----------------------|-----------|------------------|-----------|
| Source Type | ESI        | Ion Polarity          | Positive  | Set Nebulizer    | 0.4 Bar   |
| Focus       | Not active | Set Capillary         | 3800 V    | Set Dry Heater   | 200 °C    |
| Scan Begin  | 50 m/z     | Set End Plate Offset  | -500 V    | Set Dry Gas      | 6.0 l/min |
| Scan End    | 1800 m/z   | Set Collision Cell RF | 350.0 Vpp | Set Divert Valve | Waste     |

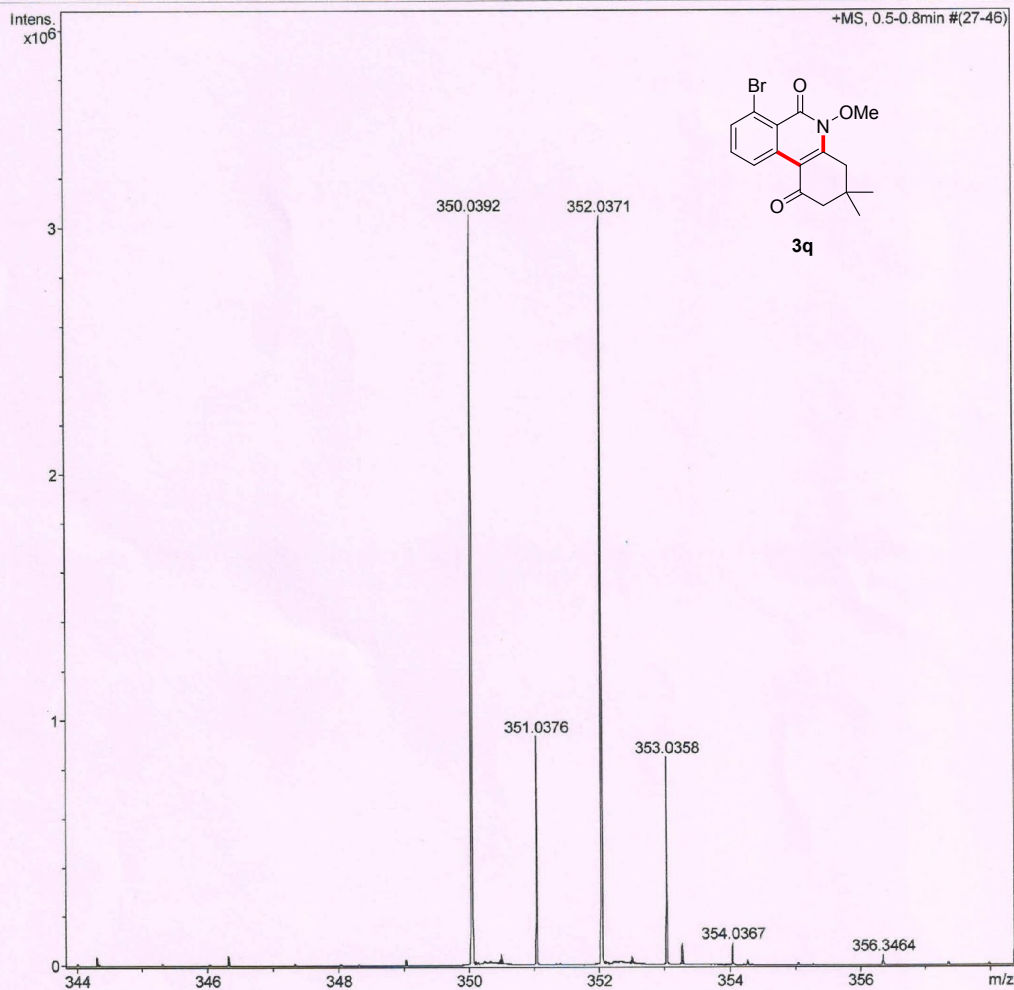

HRMS spectrum of compound 3q

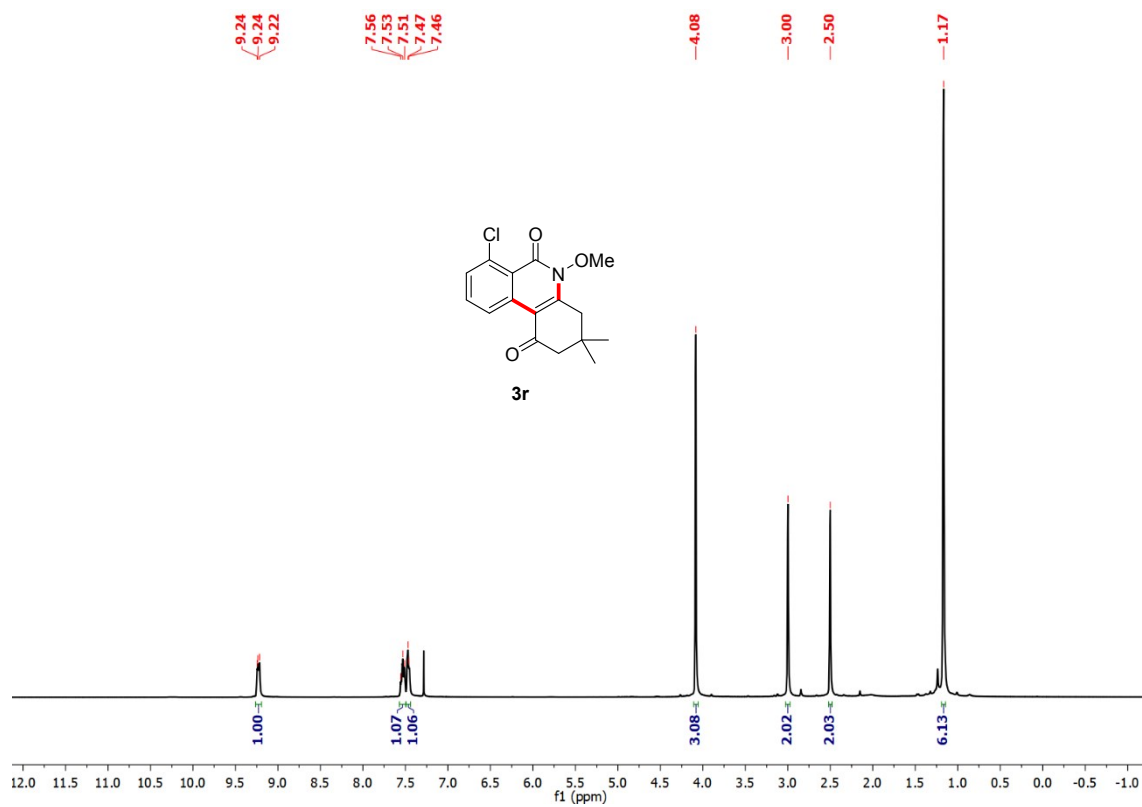

<sup>1</sup>H NMR spectrum of compound 3r in CDCl<sub>3</sub>

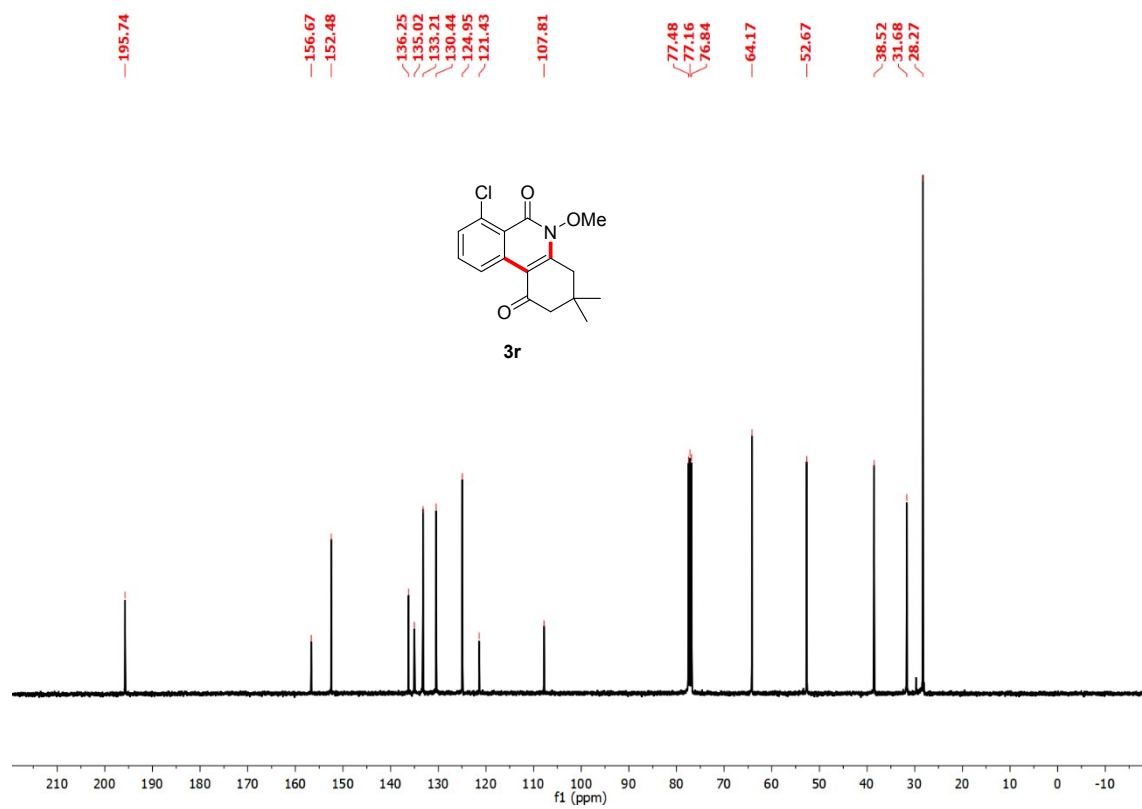

<sup>13</sup>C NMR spectrum of compound 3r in CDCl<sub>3</sub>

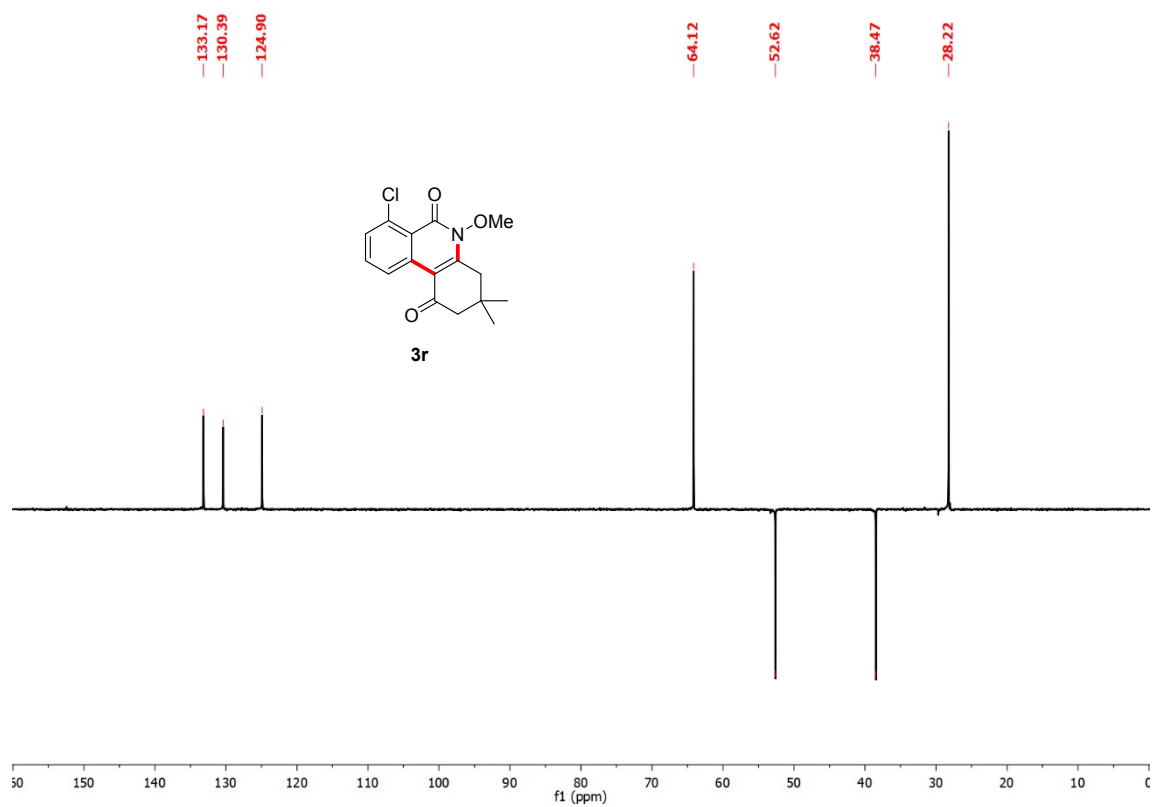

DEPT-135 NMR spectrum of compound 3r in CDCl<sub>3</sub>

# UOH -SCHOOL OF CHEMISTRY -HRMS

## Analysis Info

Analysis Name D:\Data\2018\PROF RNINOV\ASB-74.d  
Method tune\_low\_Pos-R2.m  
Sample Name ASB-74  
Comment

Acquisition Date 12/3/2018 7:05:22 PM

Operator UOH-Chemistry  
Instrument maXis 10138

## Acquisition Parameter

|             |            |                       |           |                  |           |
|-------------|------------|-----------------------|-----------|------------------|-----------|
| Source Type | ESI        | Ion Polarity          | Positive  | Set Nebulizer    | 0.3 Bar   |
| Focus       | Not active | Set Capillary         | 4200 V    | Set Dry Heater   | 180 °C    |
| Scan Begin  | 50 m/z     | Set End Plate Offset  | -500 V    | Set Dry Gas      | 4.0 l/min |
| Scan End    | 2580 m/z   | Set Collision Cell RF | 350.0 Vpp | Set Divert Valve | Waste     |

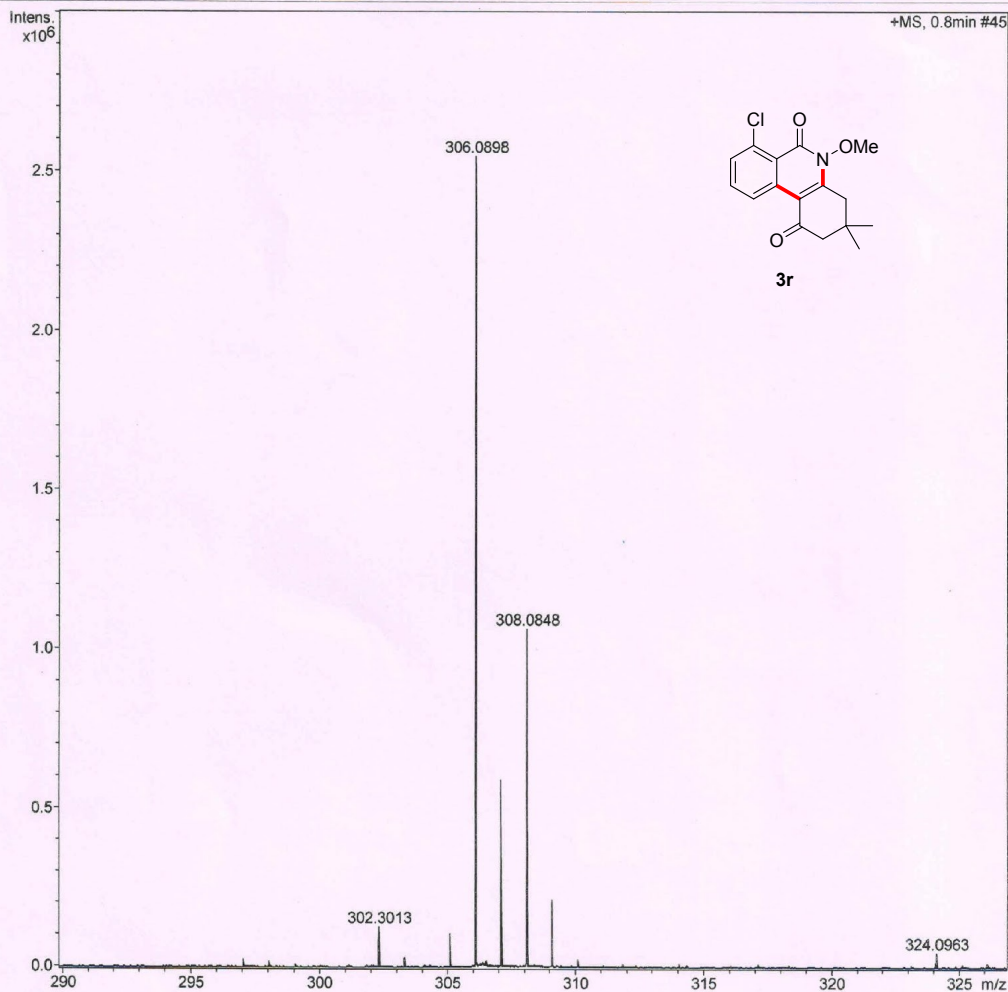

HRMS spectrum of compound 3r

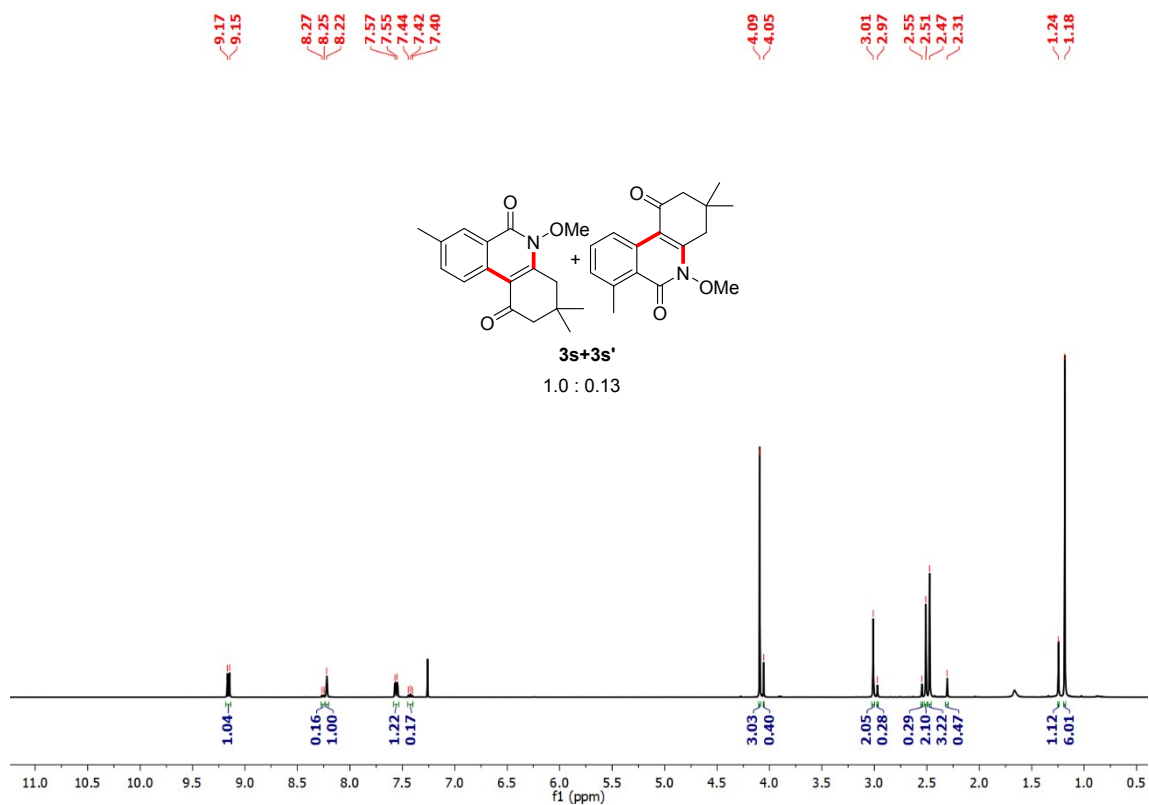

<sup>1</sup>H NMR spectrum of compound 3s+3s' in CDCl<sub>3</sub>

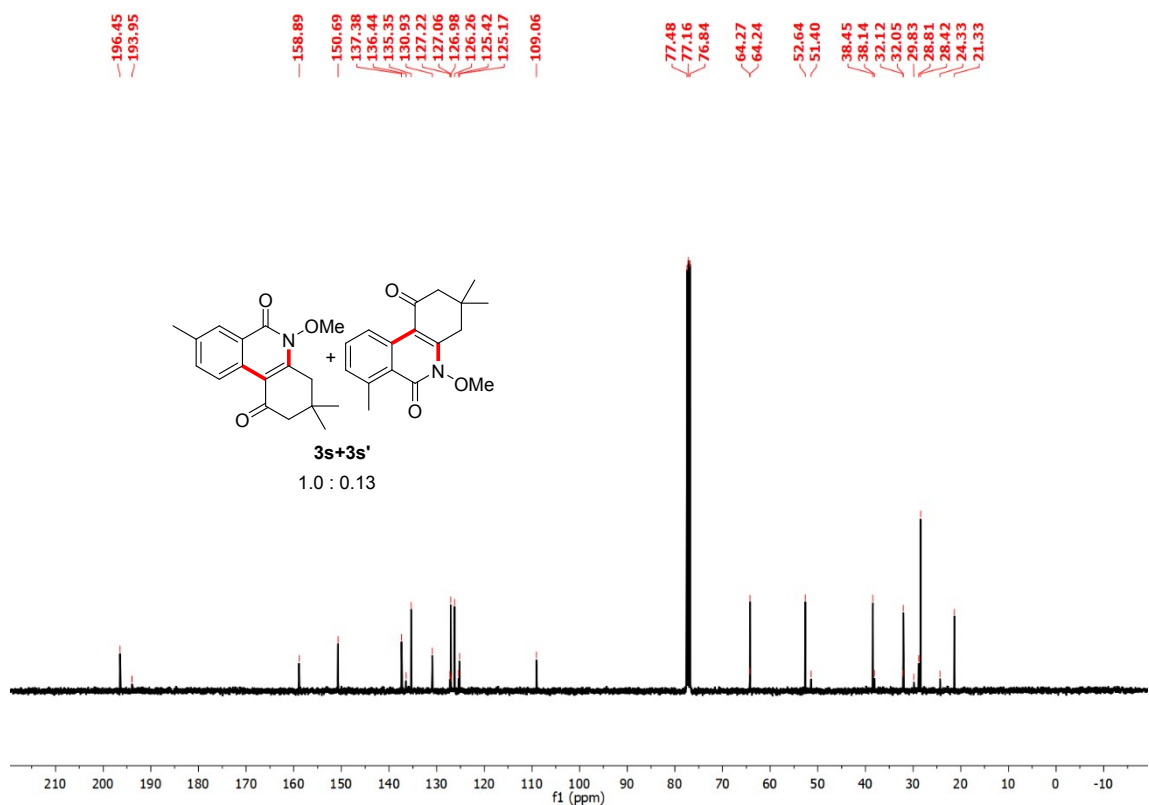

<sup>13</sup>C NMR spectrum of compound 3s+3s' in CDCl<sub>3</sub>

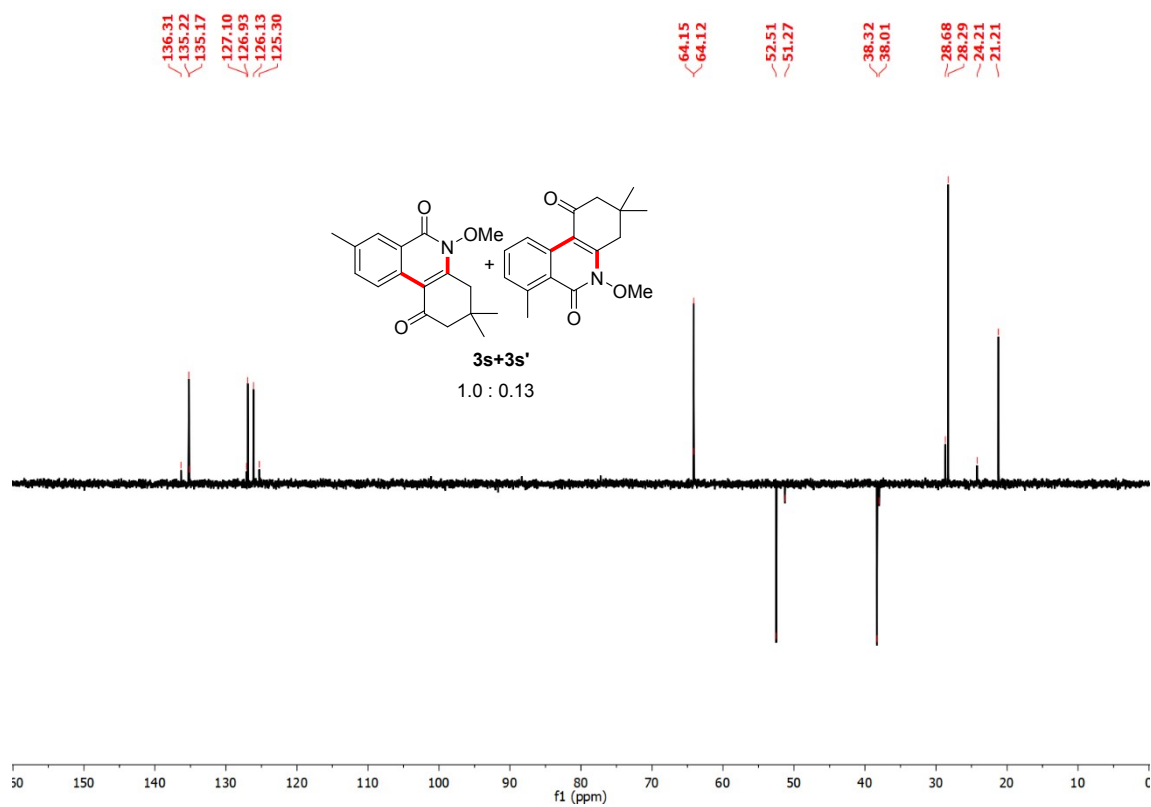

DEPT-135 NMR spectrum of compound 3s+3s' in CDCl<sub>3</sub>

UOH -SCHOOL OF CHEMISTRY -HRMS

Analysis Info

Analysis Name D:\Data\2018\PROF RNNOVASB-62.d  
 Method tune\_low\_Pos-R2.m  
 Sample Name ASB-62  
 Comment

Acquisition Date 12/3/2018 6:50:18 PM

Operator UOH-Chemistry  
 Instrument maXis 10138

Acquisition Parameter

|             |            |                       |           |                  |           |
|-------------|------------|-----------------------|-----------|------------------|-----------|
| Source Type | ESI        | Ion Polarity          | Positive  | Set Nebulizer    | 0.3 Bar   |
| Focus       | Not active | Set Capillary         | 4200 V    | Set Dry Heater   | 180 °C    |
| Scan Begin  | 50 m/z     | Set End Plate Offset  | -500 V    | Set Dry Gas      | 4.0 l/min |
| Scan End    | 2580 m/z   | Set Collision Cell RF | 350.0 Vpp | Set Divert Valve | Waste     |

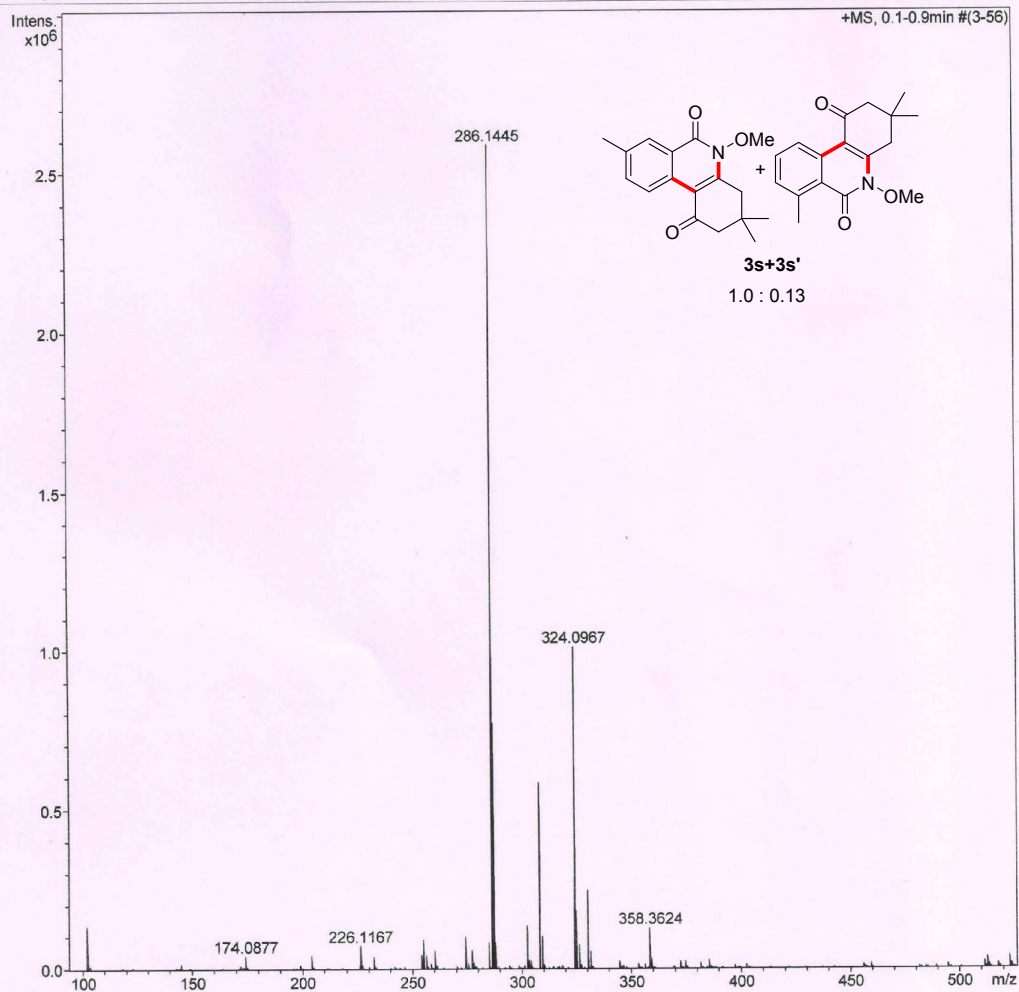

HRMS spectrum of compound 3s



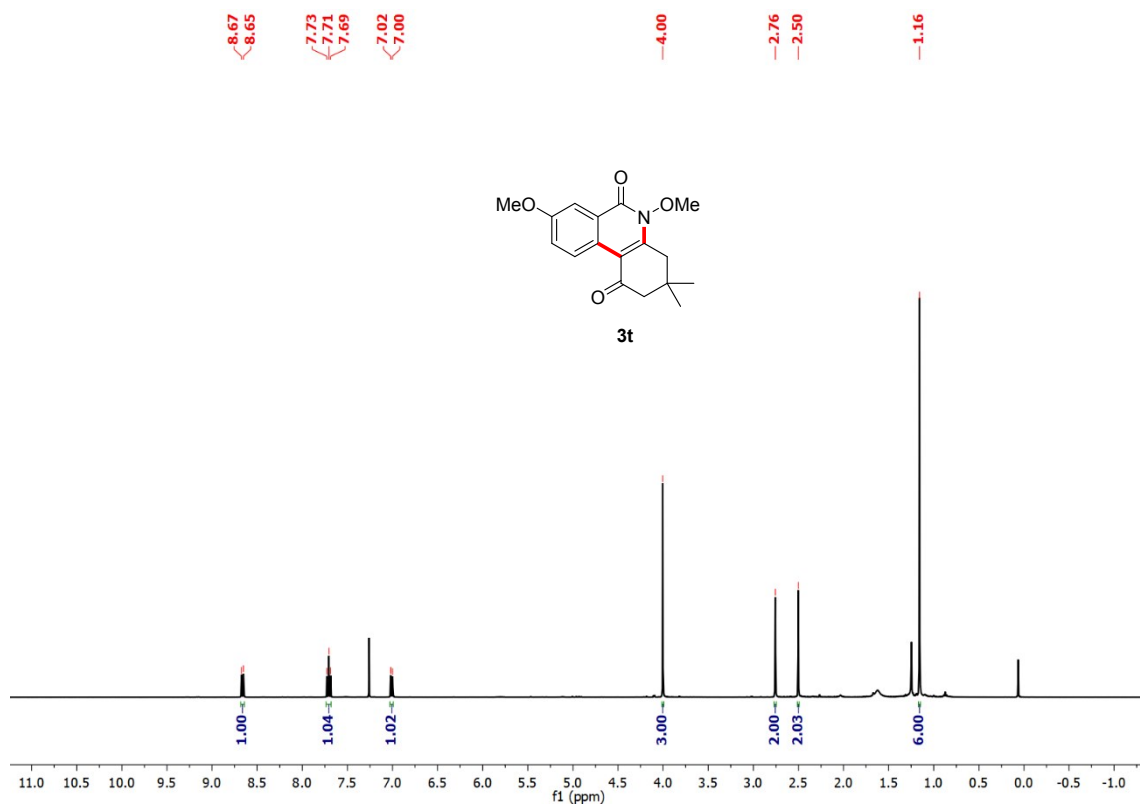

<sup>1</sup>H NMR spectrum of compound 3t in CDCl<sub>3</sub>

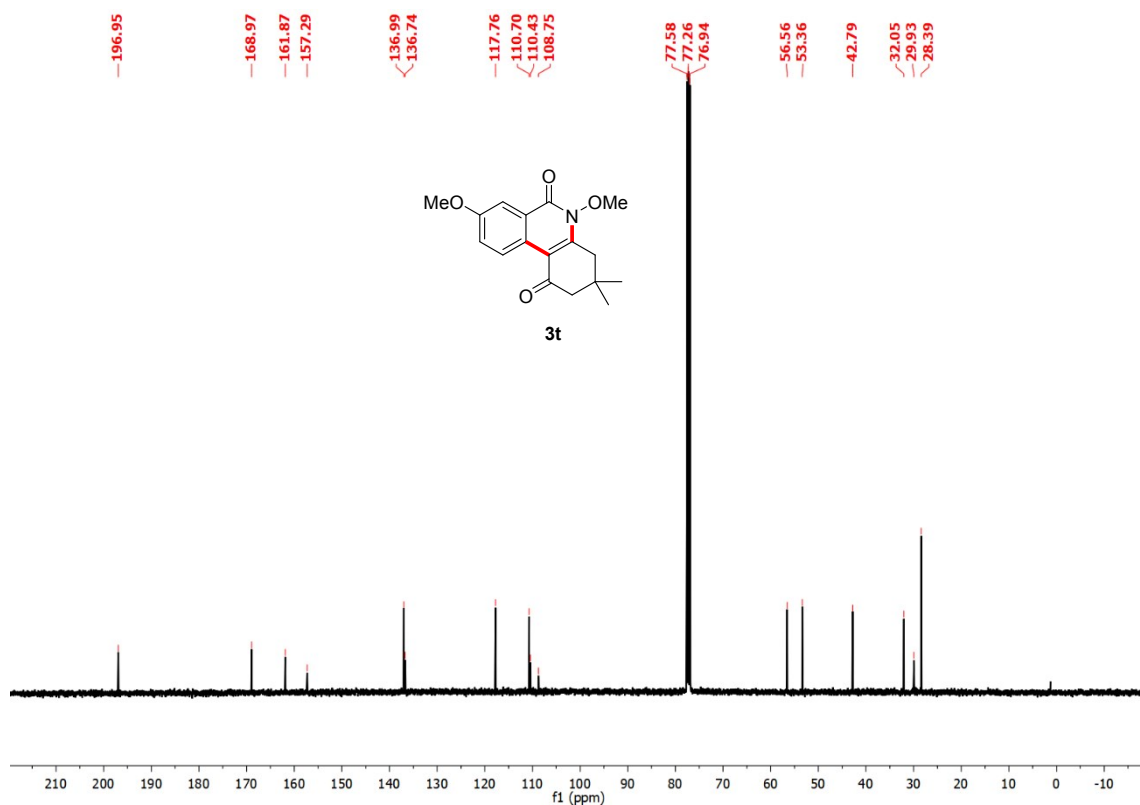

<sup>13</sup>C NMR spectrum of compound 3t in CDCl<sub>3</sub>



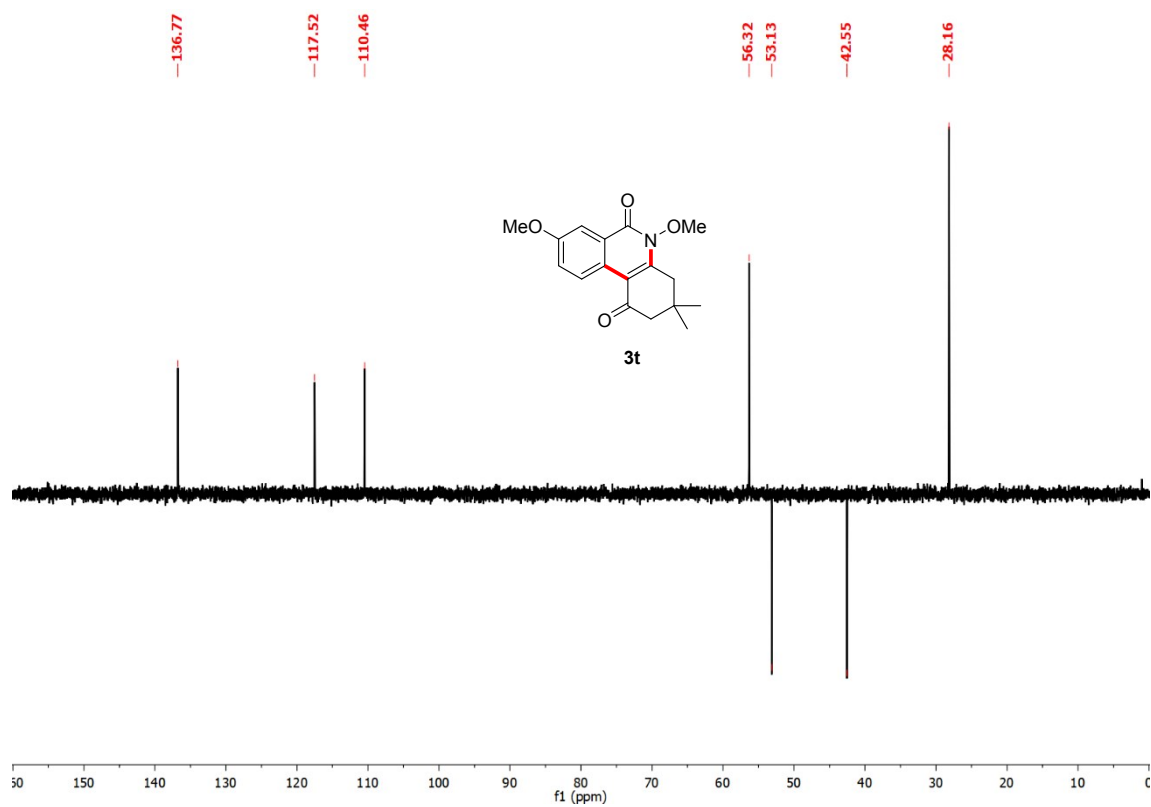

DEPT-135 NMR spectrum of compound 3t in CDCl<sub>3</sub>

# UOH -SCHOOL OF CHEMISTRY -HRMS

## Analysis Info

Analysis Name D:\Data\2018\PROF RN\DEC\ASB-63.d  
Method tune\_low.m  
Sample Name ASB-63-CHCL3-ACN  
Comment

Acquisition Date 12/4/2018 10:50:38 AM

Operator UOH-Chemistry  
Instrument maXis 10138

## Acquisition Parameter

|             |            |                       |           |                  |           |
|-------------|------------|-----------------------|-----------|------------------|-----------|
| Source Type | ESI        | Ion Polarity          | Positive  | Set Nebulizer    | 0.4 Bar   |
| Focus       | Not active | Set Capillary         | 2800 V    | Set Dry Heater   | 200 °C    |
| Scan Begin  | 50 m/z     | Set End Plate Offset  | -500 V    | Set Dry Gas      | 6.0 l/min |
| Scan End    | 1800 m/z   | Set Collision Cell RF | 200.0 Vpp | Set Divert Valve | Waste     |

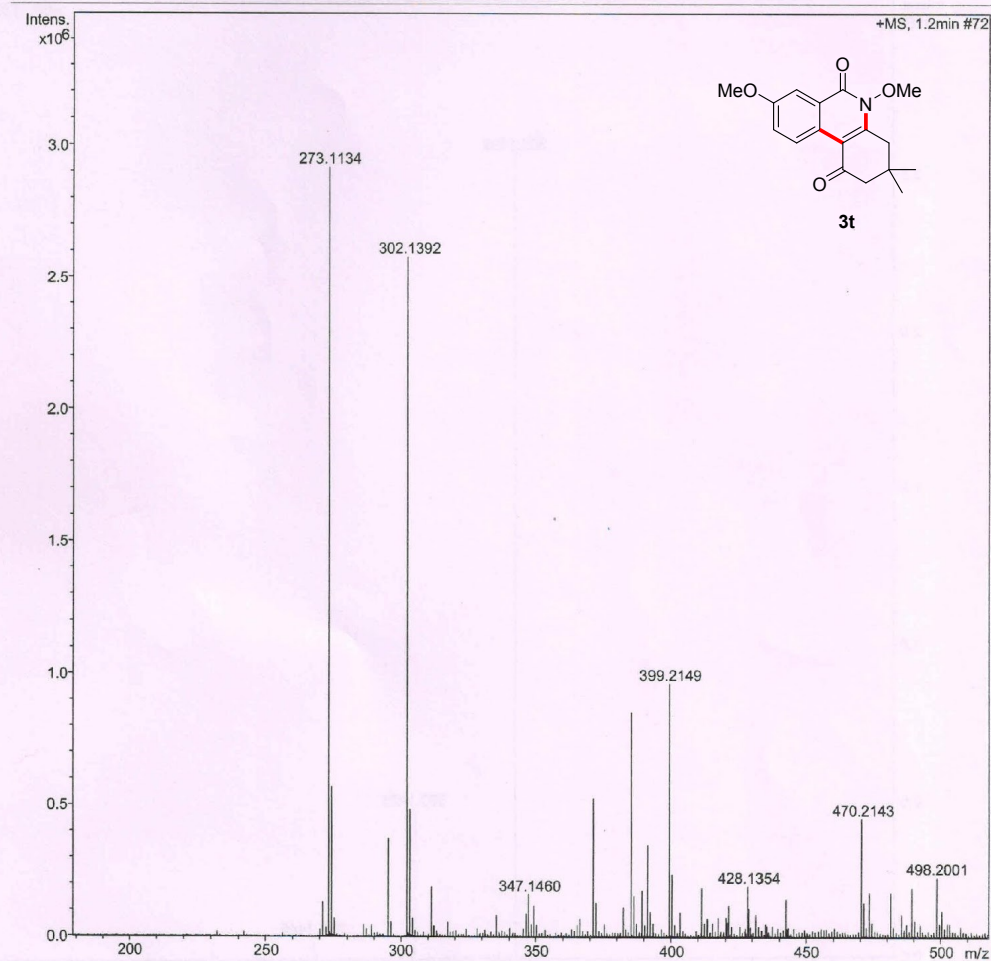

HRMS spectrum of compound 3t

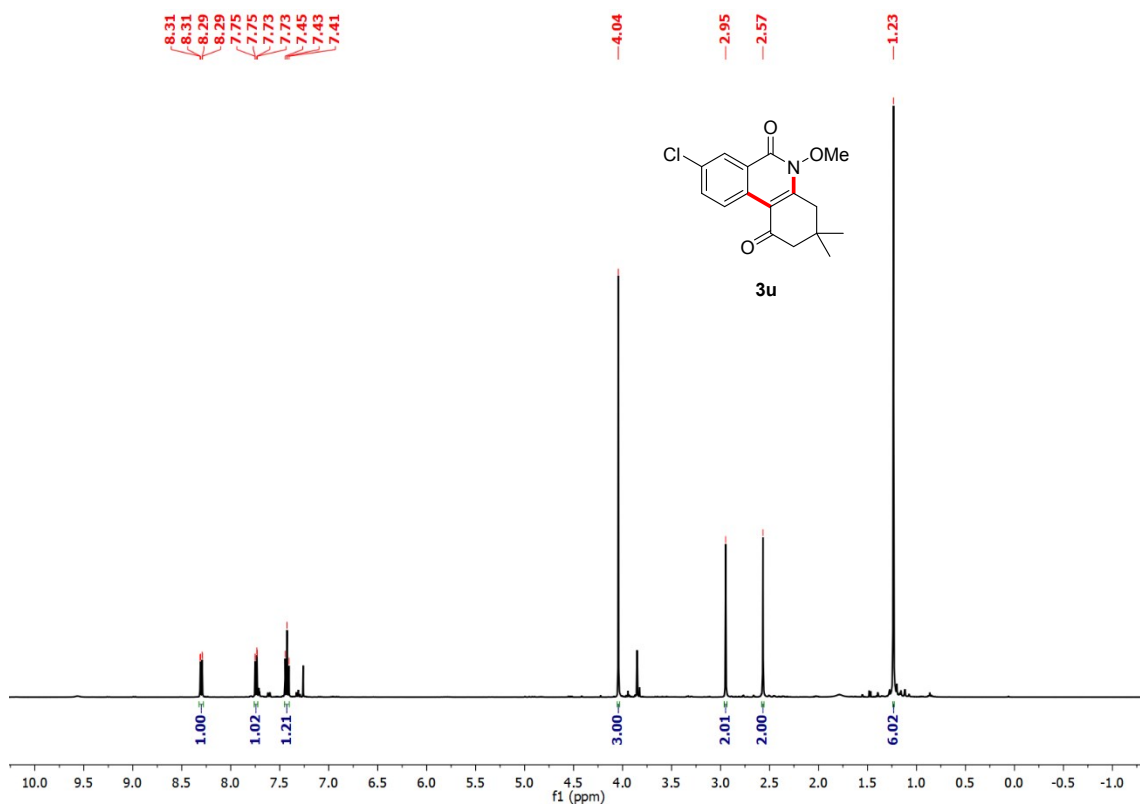

<sup>1</sup>H NMR spectrum of compound **3u** in CDCl<sub>3</sub>

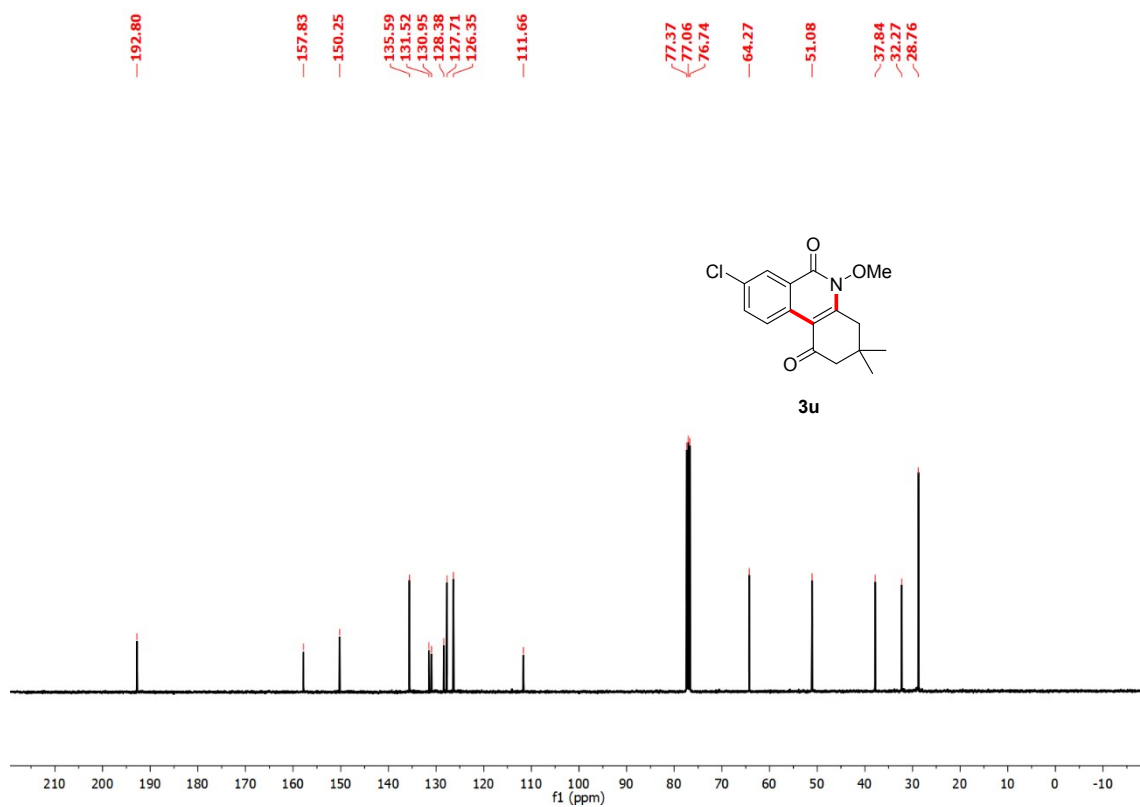

<sup>13</sup>C NMR spectrum of compound **3u** in CDCl<sub>3</sub>

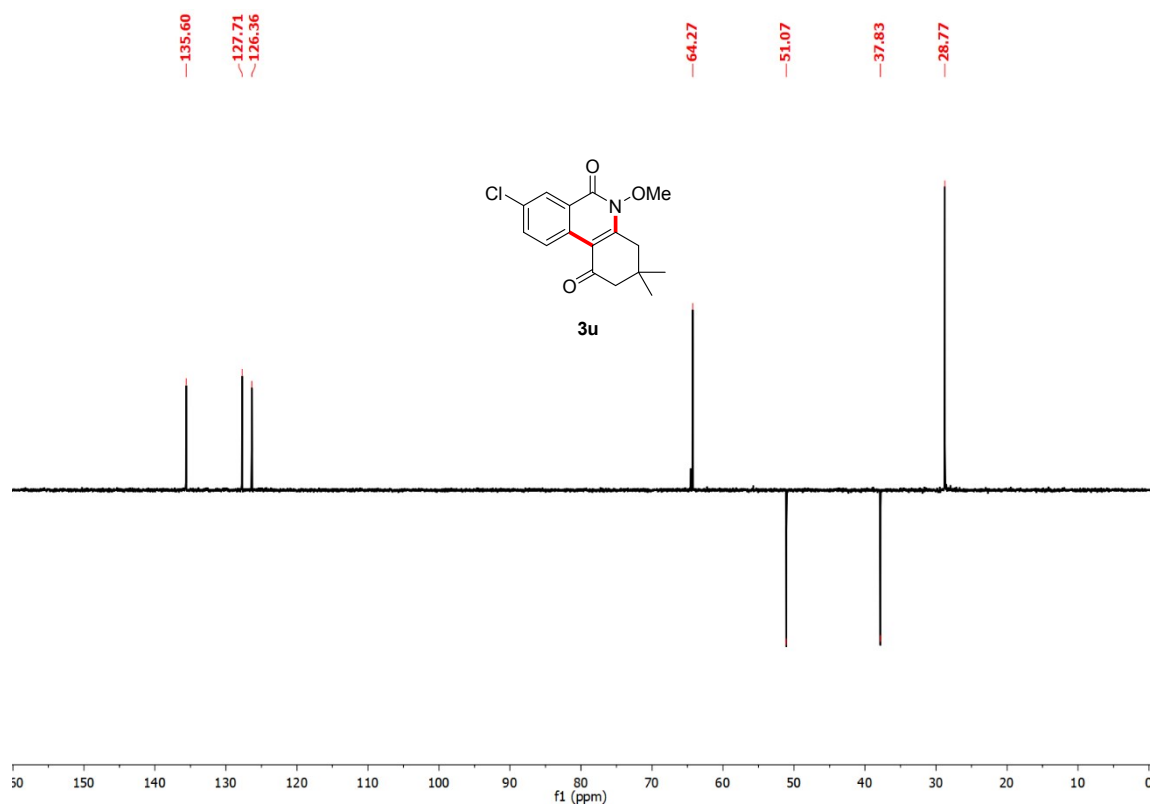

DEPT-135 NMR spectrum of compound 3u in CDCl<sub>3</sub>

# UOH -SCHOOL OF CHEMISTRY -HRMS

## Analysis Info

Analysis Name D:\Data\2018\PROF RN\DECVASB-60b.d  
Method tune\_low\_Pos-R2.m  
Sample Name ASB-60b-CHCL3-ACN  
Comment

Acquisition Date 12/4/2018 11:11:52 AM

Operator UOH-Chemistry  
Instrument maXis 10138

## Acquisition Parameter

|             |            |                       |           |                  |           |
|-------------|------------|-----------------------|-----------|------------------|-----------|
| Source Type | ESI        | Ion Polarity          | Positive  | Set Nebulizer    | 0.3 Bar   |
| Focus       | Not active | Set Capillary         | 4200 V    | Set Dry Heater   | 180 °C    |
| Scan Begin  | 50 m/z     | Set End Plate Offset  | -500 V    | Set Dry Gas      | 4.0 l/min |
| Scan End    | 2580 m/z   | Set Collision Cell RF | 350.0 Vpp | Set Divert Valve | Waste     |

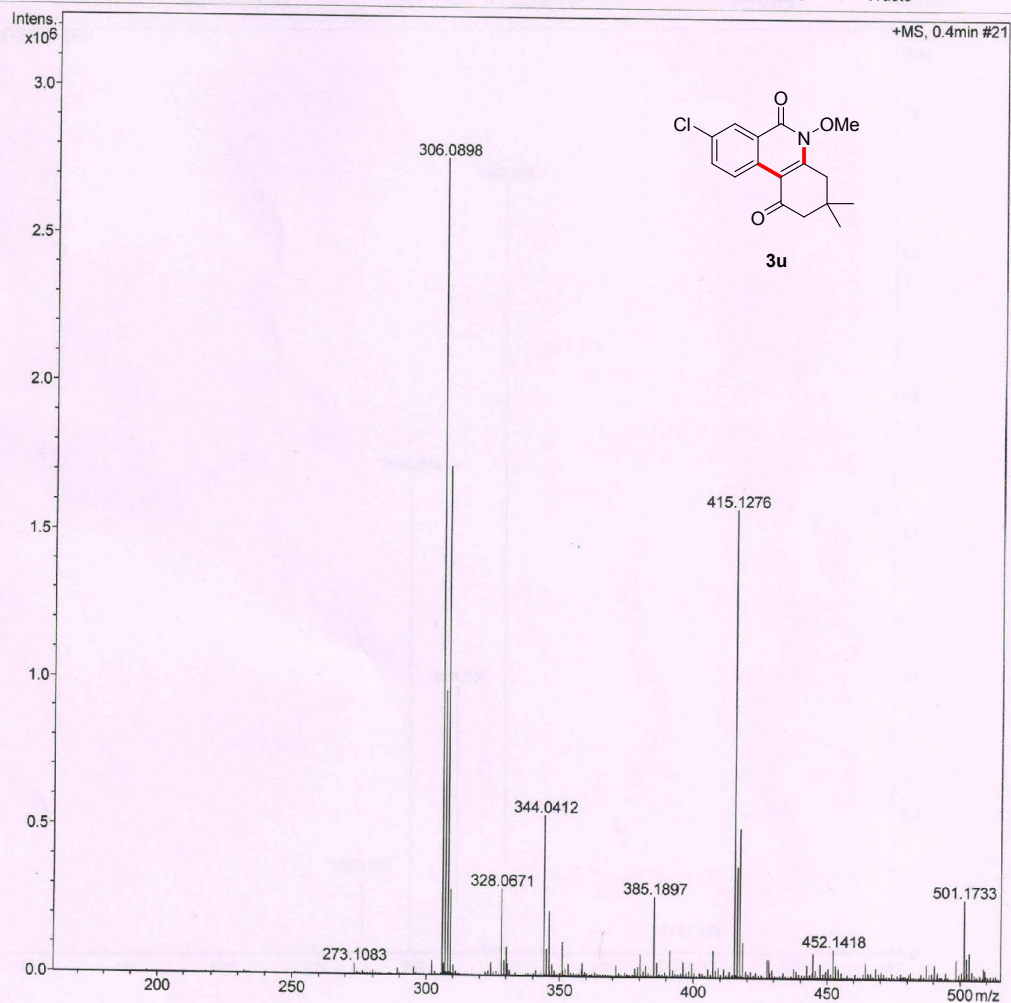

HRMS spectrum of compound 3u

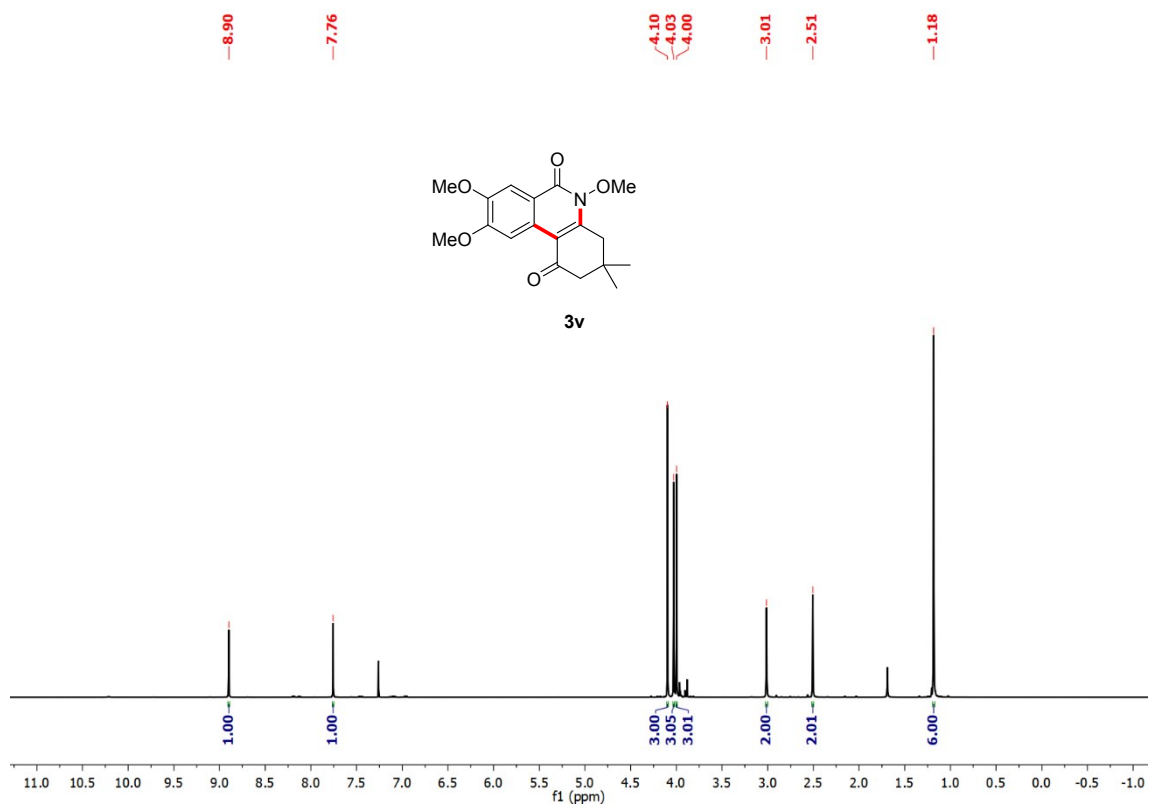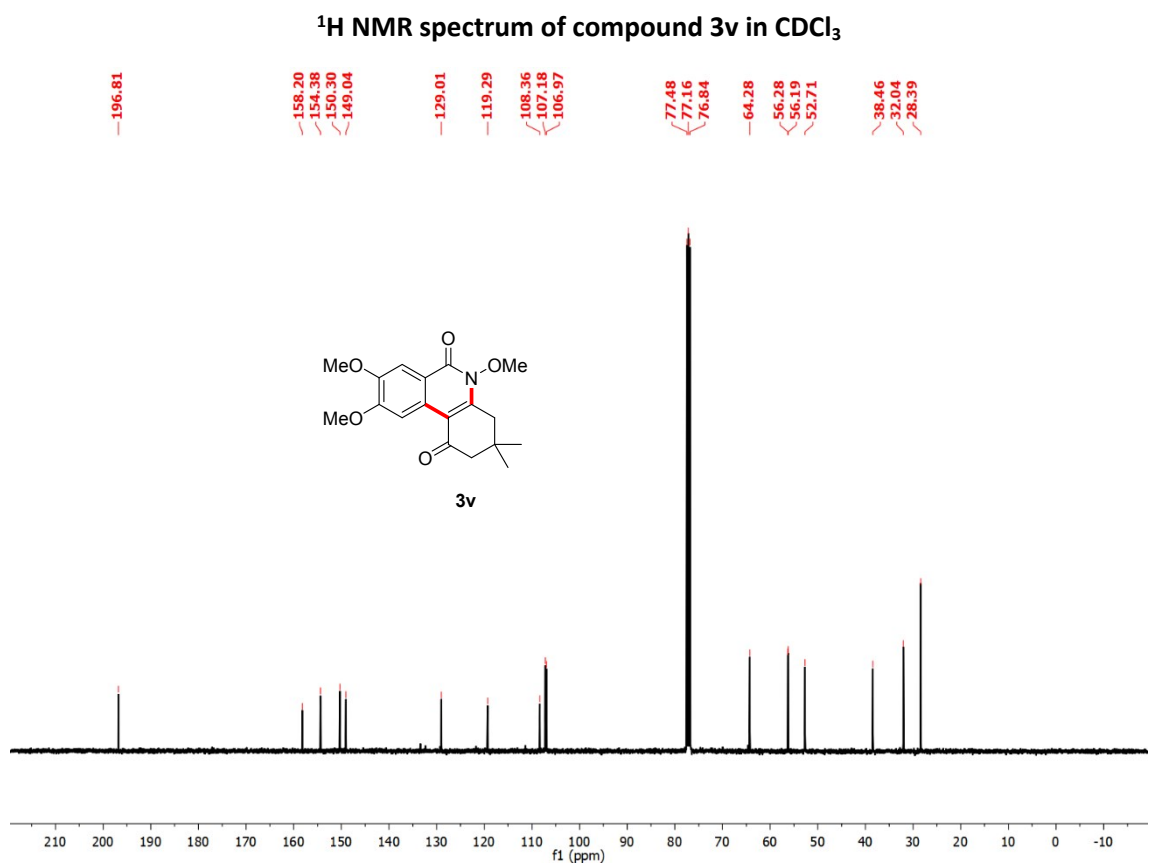

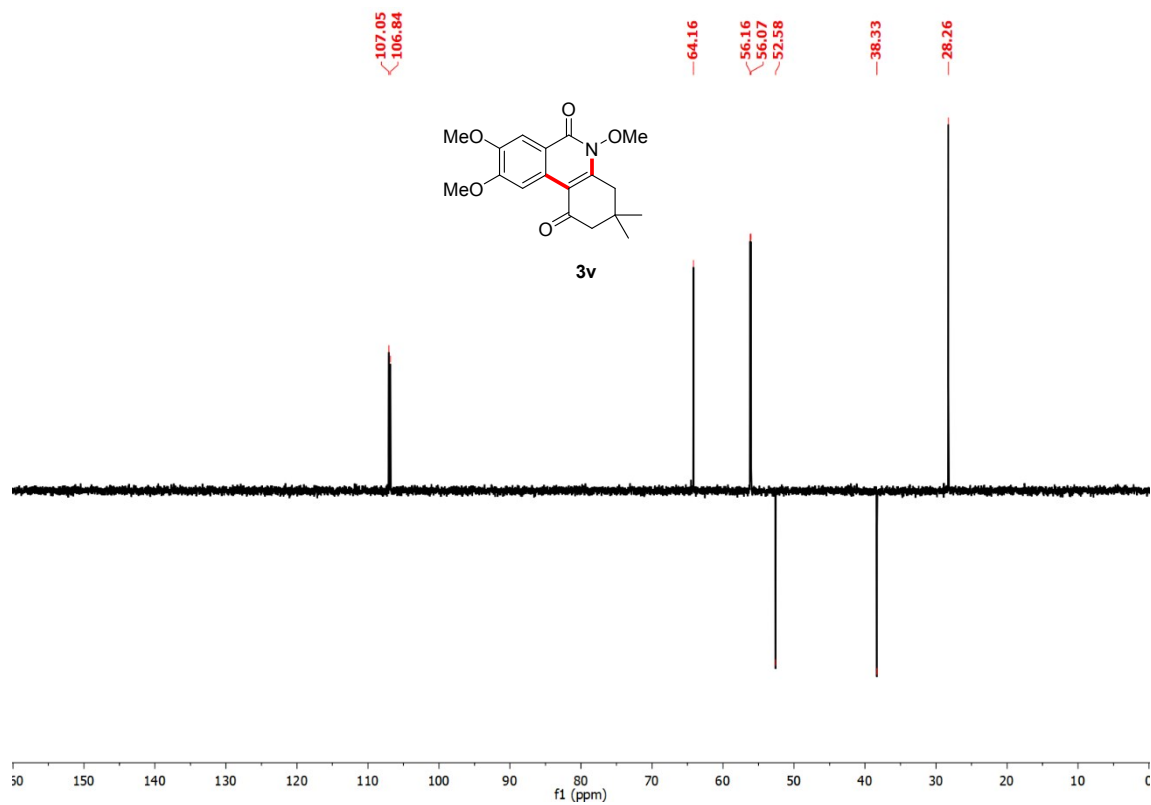

DEPT-135 NMR spectrum of compound 3v in CDCl<sub>3</sub>



# UOH -SCHOOL OF CHEMISTRY -HRMS

## Analysis Info

Analysis Name D:\Data\2018\PROF RN\DEC\ASB-61.d  
Method tune\_low\_Pos-R2.m  
Sample Name ASB-61-CHCL3-ACN  
Comment

Acquisition Date 12/4/2018 11:21:08 AM

Operator UOH-Chemistry  
Instrument maXis 10138

## Acquisition Parameter

|             |            |                       |           |                  |           |
|-------------|------------|-----------------------|-----------|------------------|-----------|
| Source Type | ESI        | Ion Polarity          | Positive  | Set Nebulizer    | 0.3 Bar   |
| Focus       | Not active | Set Capillary         | 4200 V    | Set Dry Heater   | 180 °C    |
| Scan Begin  | 50 m/z     | Set End Plate Offset  | -500 V    | Set Dry Gas      | 4.0 l/min |
| Scan End    | 2580 m/z   | Set Collision Cell RF | 350.0 Vpp | Set Divert Valve | Waste     |

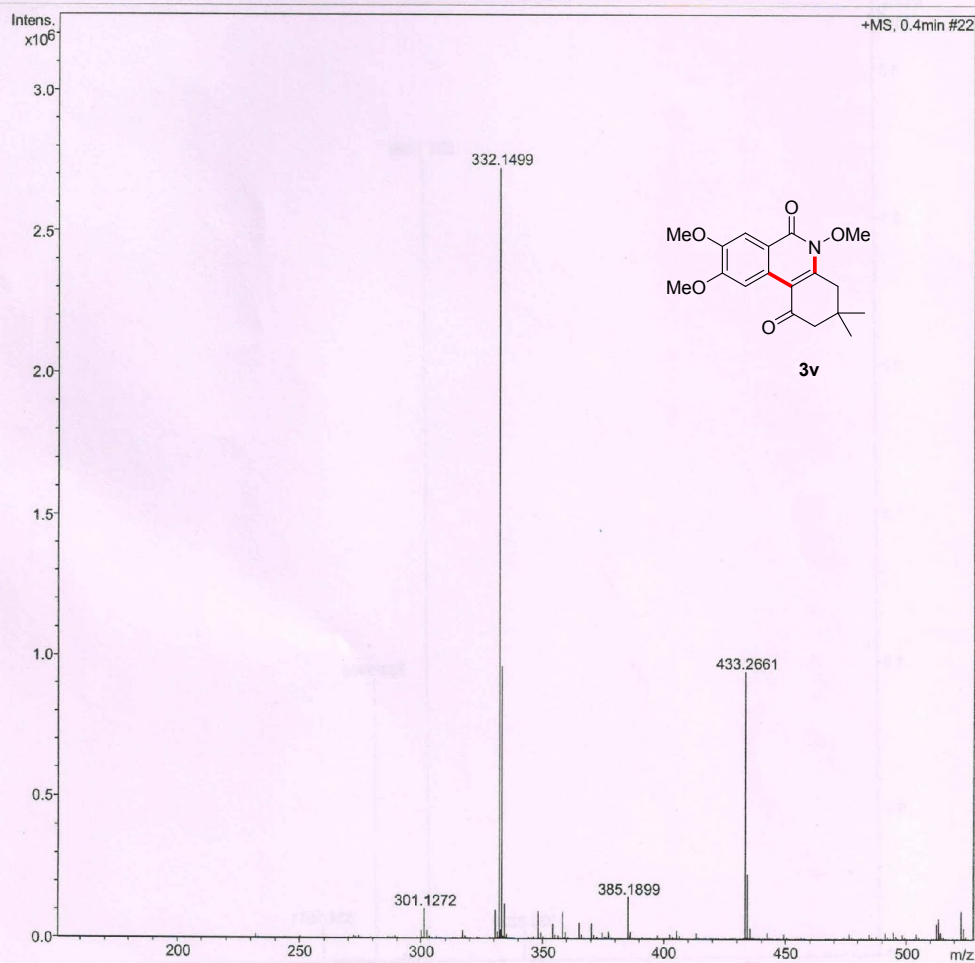

HRMS spectrum of compound 3v



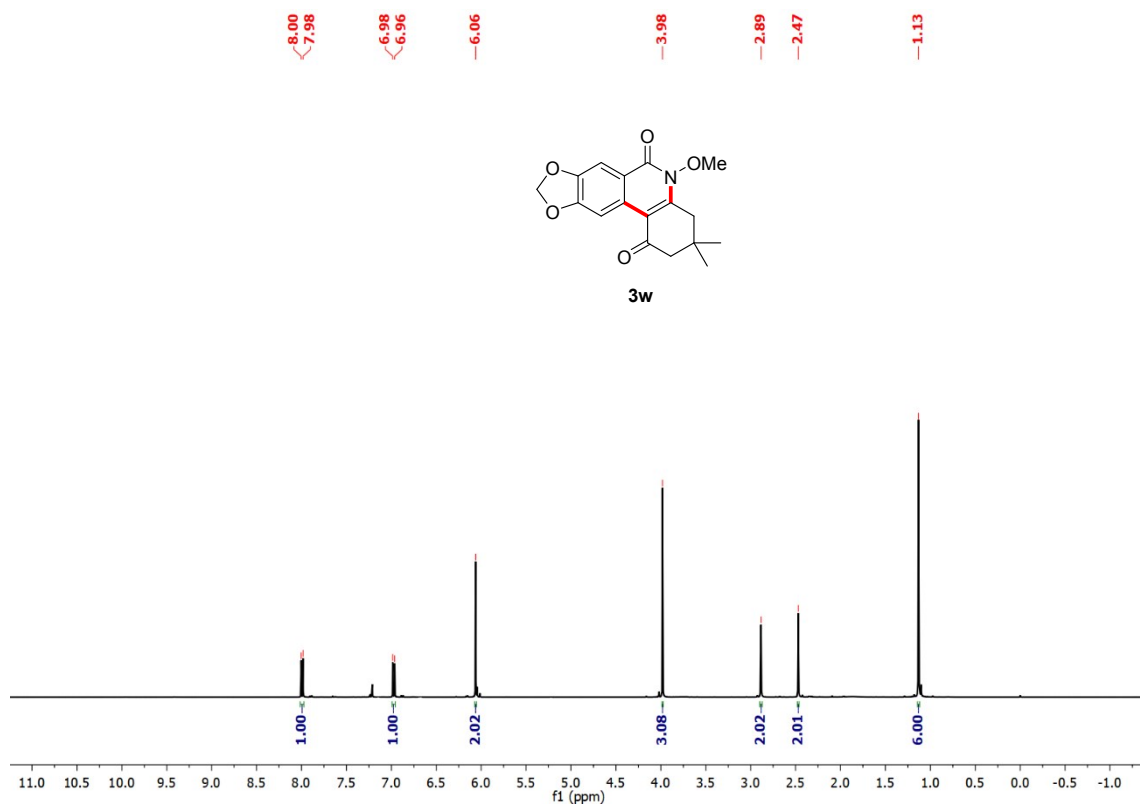

<sup>1</sup>H NMR spectrum of compound **3w** in CDCl<sub>3</sub>

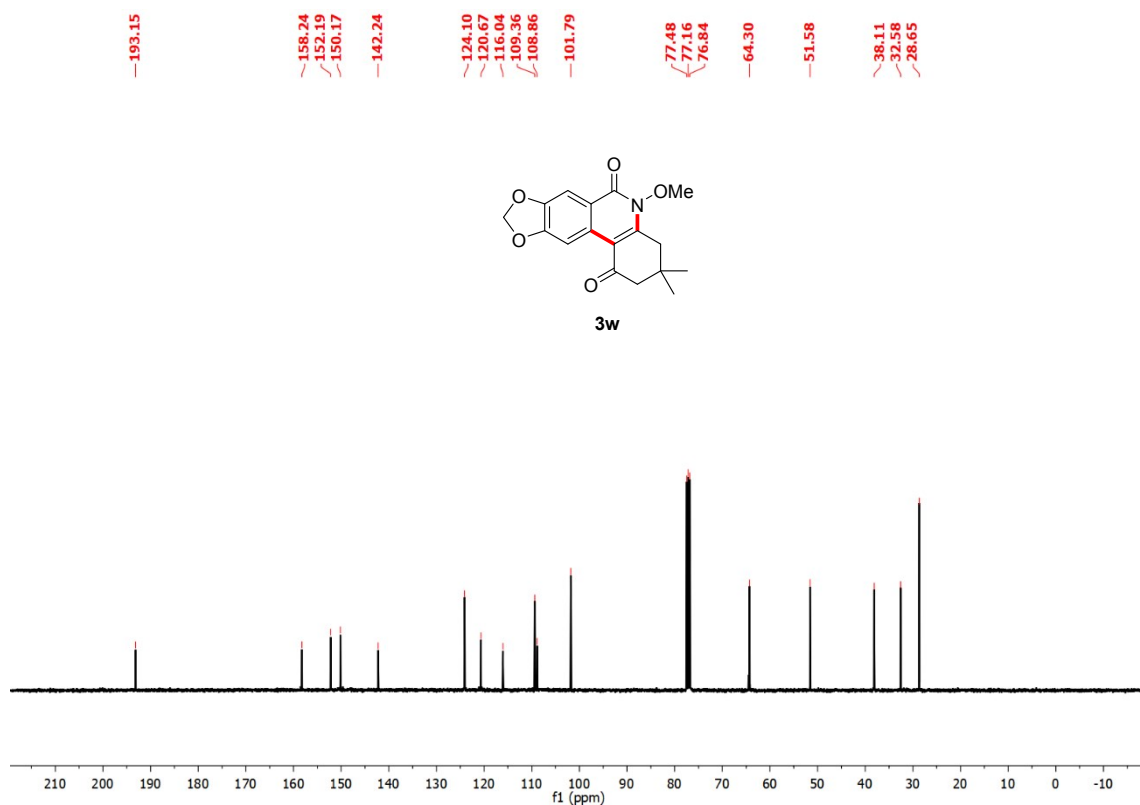

<sup>13</sup>C NMR spectrum of compound **3w** in CDCl<sub>3</sub>

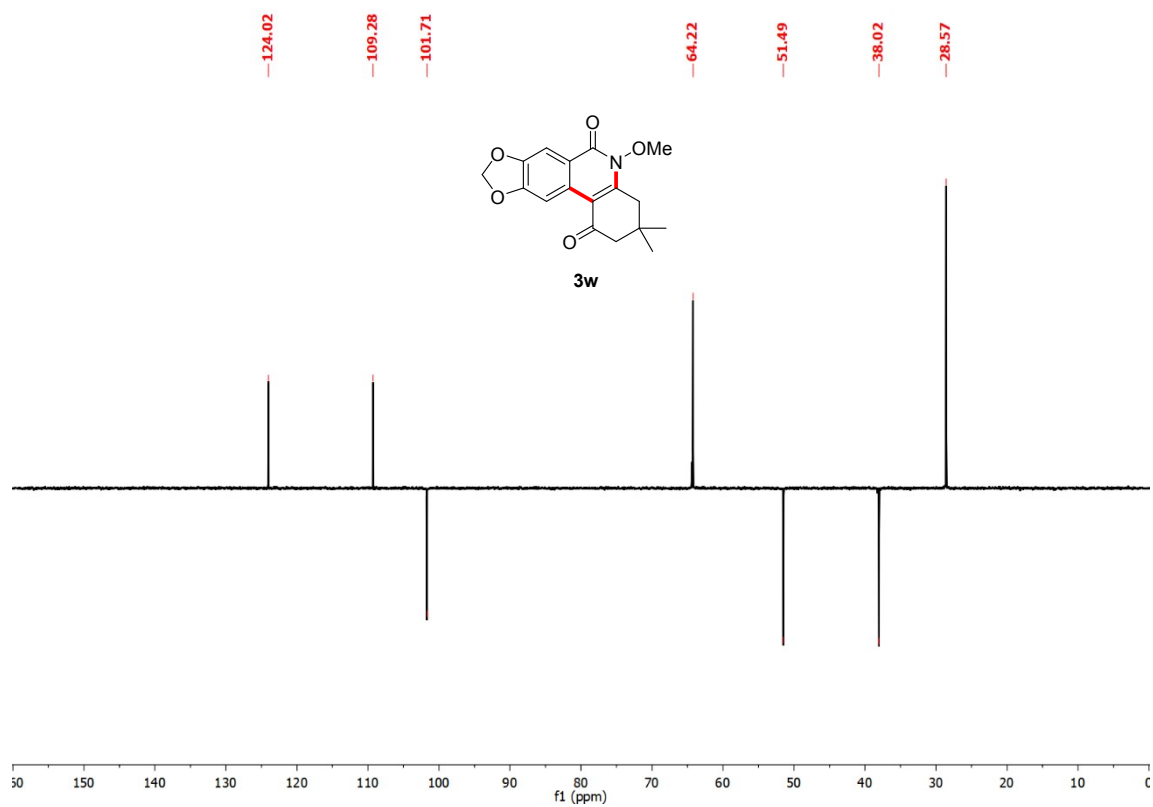

DEPT-135 NMR spectrum of compound **3w** in  $\text{CDCl}_3$

# UOH -SCHOOL OF CHEMISTRY -HRMS

## Analysis Info

Analysis Name D:\Data\2018\PROF RNINOVASB-66B.d  
Method tune\_low\_Pos-R2.m  
Sample Name ASB-66B  
Comment

Acquisition Date 12/3/2018 6:41:45 PM

Operator UOH-Chemistry  
Instrument maXis 10138

## Acquisition Parameter

|             |            |                       |           |                  |           |
|-------------|------------|-----------------------|-----------|------------------|-----------|
| Source Type | ESI        | Ion Polarity          | Positive  | Set Nebulizer    | 0.3 Bar   |
| Focus       | Not active | Set Capillary         | 4200 V    | Set Dry Heater   | 180 °C    |
| Scan Begin  | 50 m/z     | Set End Plate Offset  | -500 V    | Set Dry Gas      | 4.0 l/min |
| Scan End    | 2580 m/z   | Set Collision Cell RF | 350.0 Vpp | Set Divert Valve | Waste     |

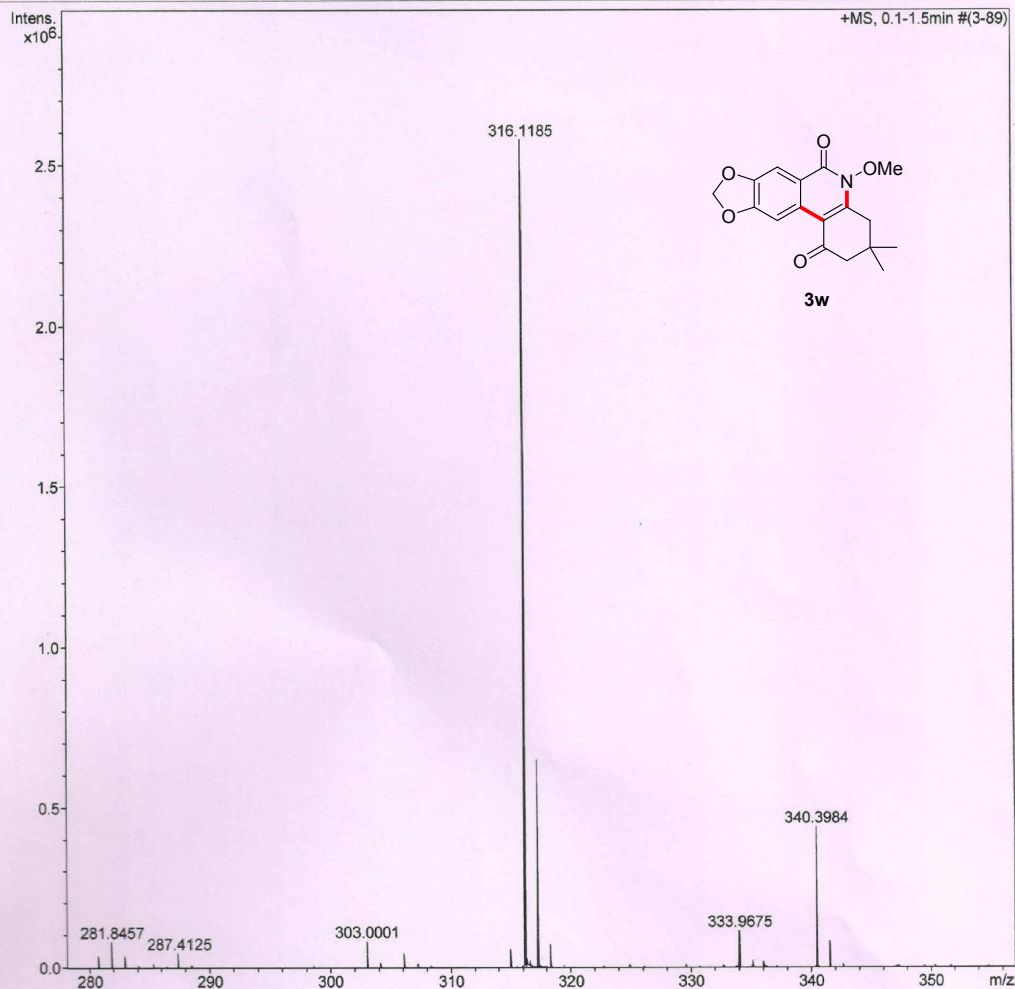

HRMS spectrum of compound 3w

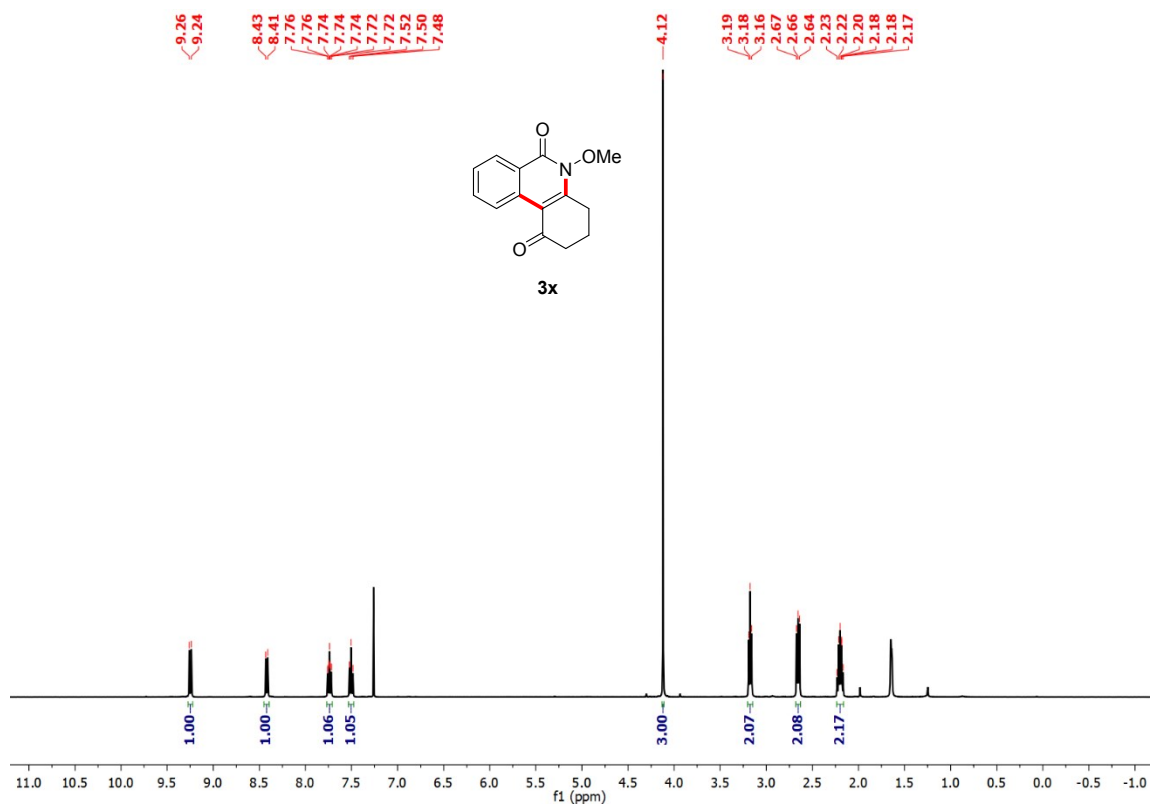

<sup>1</sup>H NMR spectrum of compound 3x in CDCl<sub>3</sub>

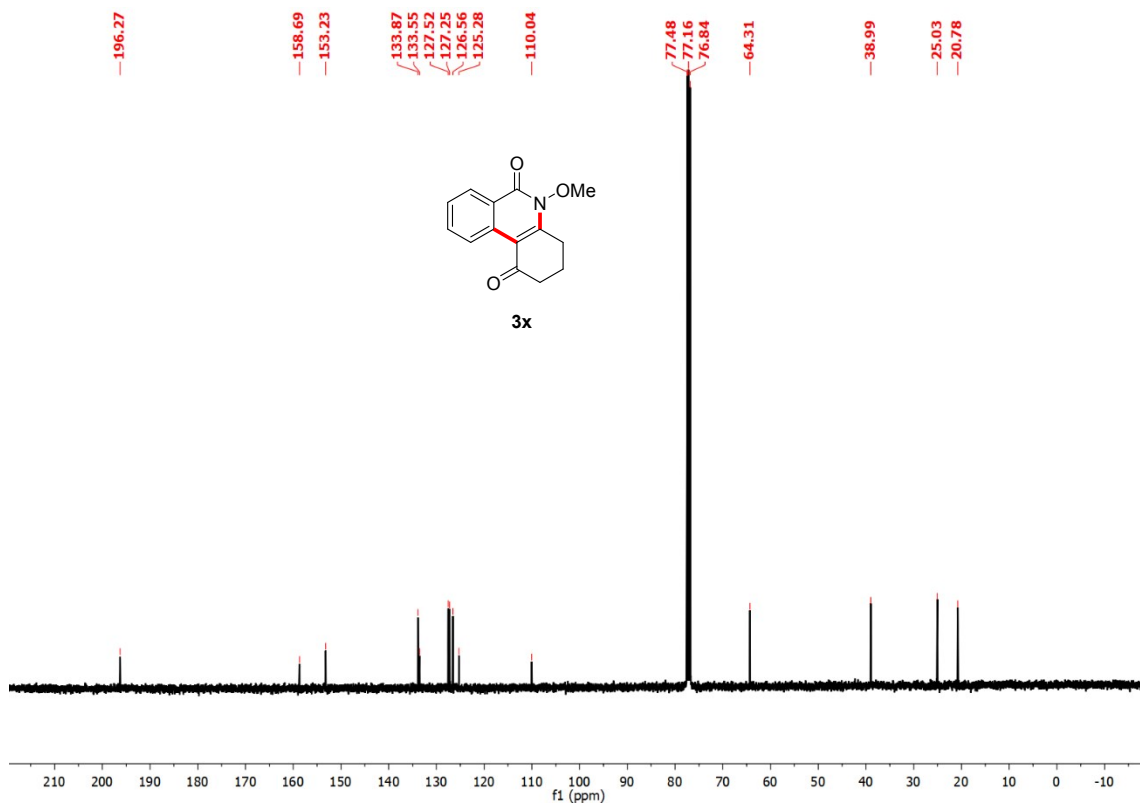

<sup>13</sup>C NMR spectrum of compound 3x in CDCl<sub>3</sub>

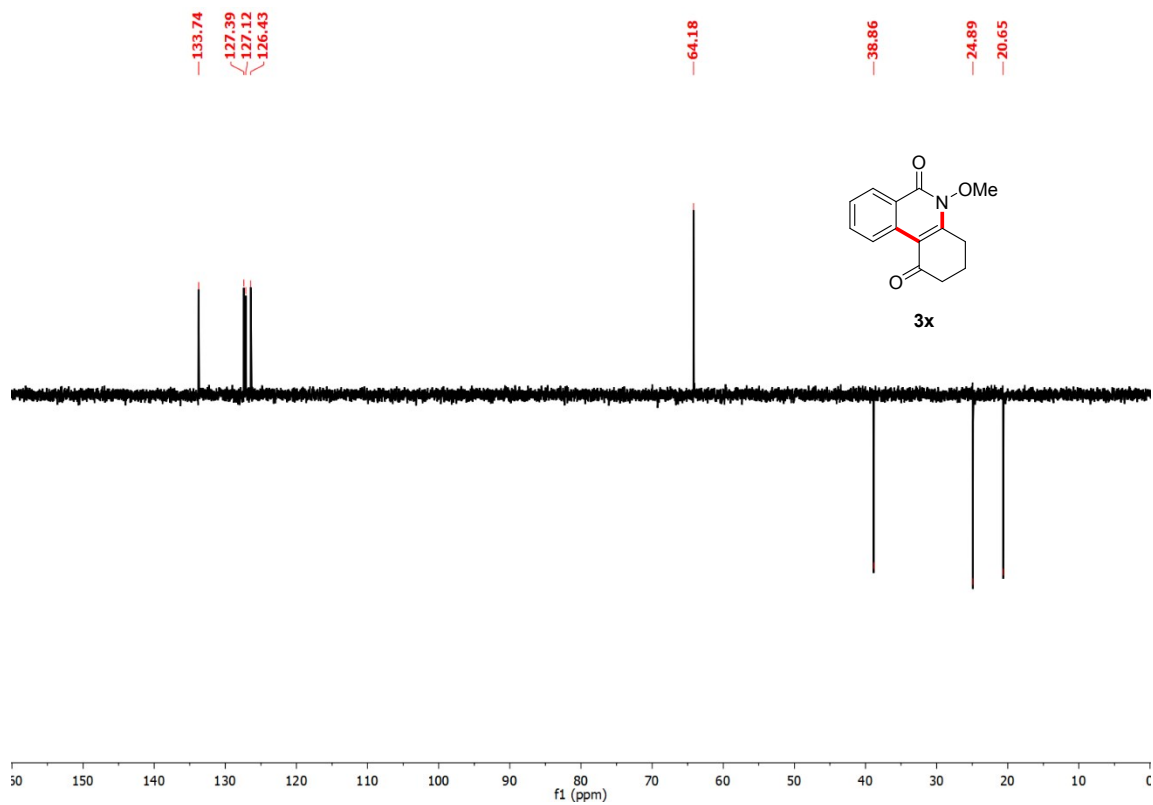

DEPT-135 NMR spectrum of compound 3x in CDCl<sub>3</sub>

# UOH -SCHOOL OF CHEMISTRY -HRMS

## Analysis Info

Analysis Name D:\Data\2018\PROF RN\DEC\NB-235.d  
 Method tune\_low.m  
 Sample Name NB-235-MEOH  
 Comment

Acquisition Date 12/28/2018 10:39:33 AM

Operator UOH-Chemistry  
 Instrument maXis 10138

## Acquisition Parameter

Source Type ESI  
 Focus Not active  
 Scan Begin 50 m/z  
 Scan End 1800 m/z

Ion Polarity Positive  
 Set Capillary 3000 V  
 Set End Plate Offset -500 V  
 Set Collision Cell RF 350.0 Vpp

Set Nebulizer 0.4 Bar  
 Set Dry Heater 200 °C  
 Set Dry Gas 6.0 l/min  
 Set Divert Valve Waste

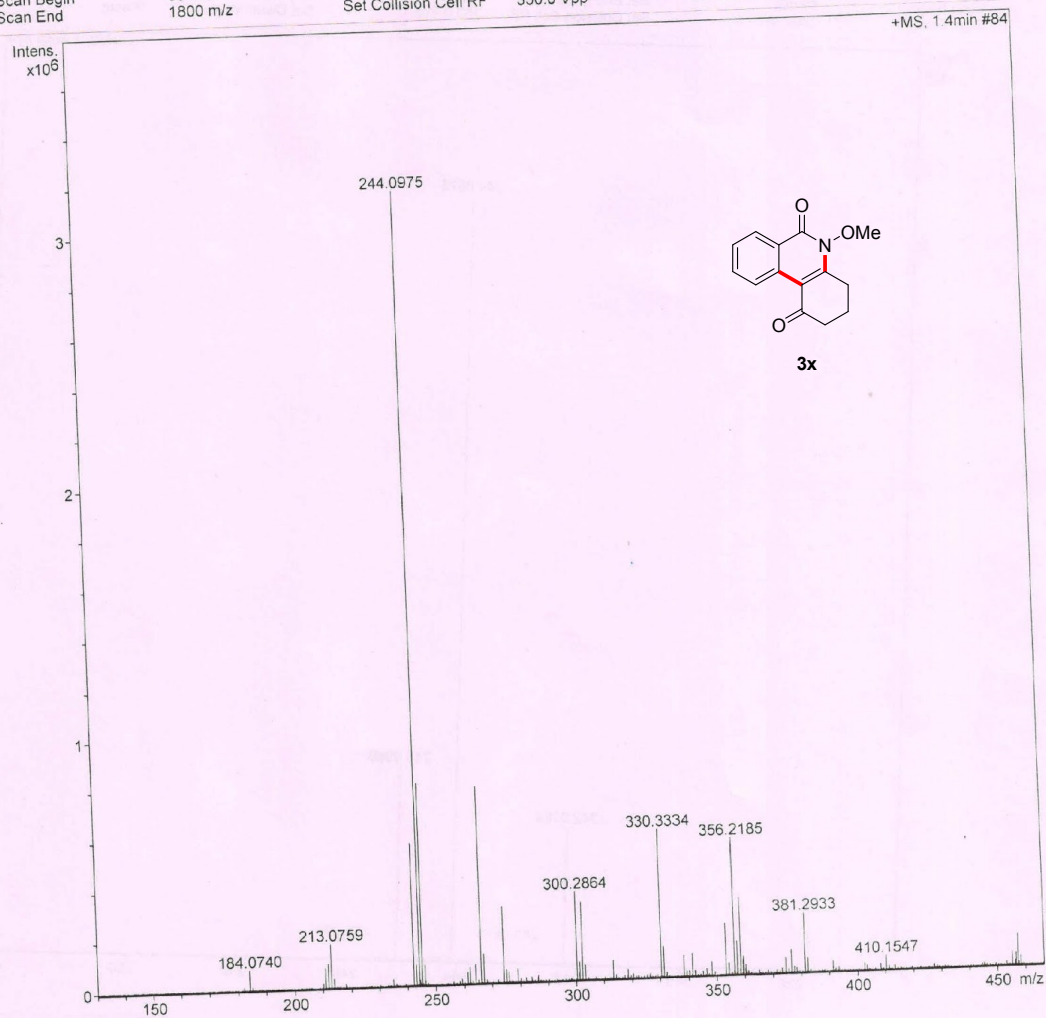

**HRMS spectrum of compound 3x**

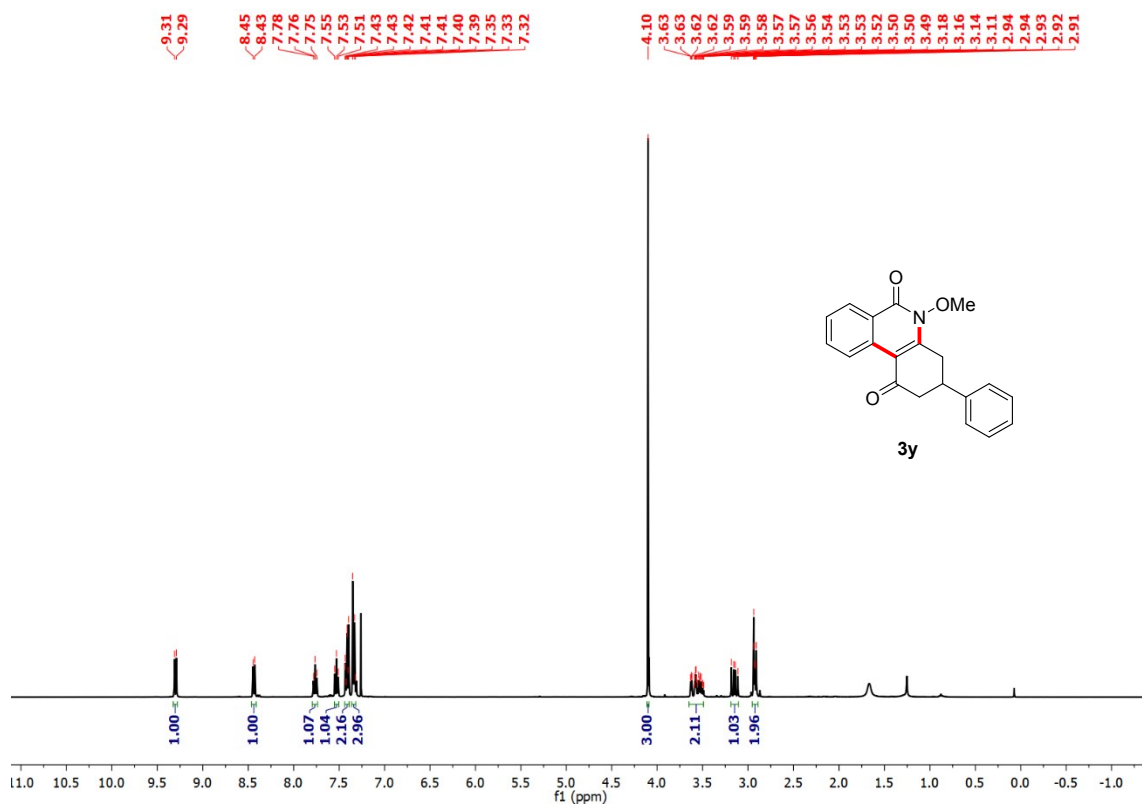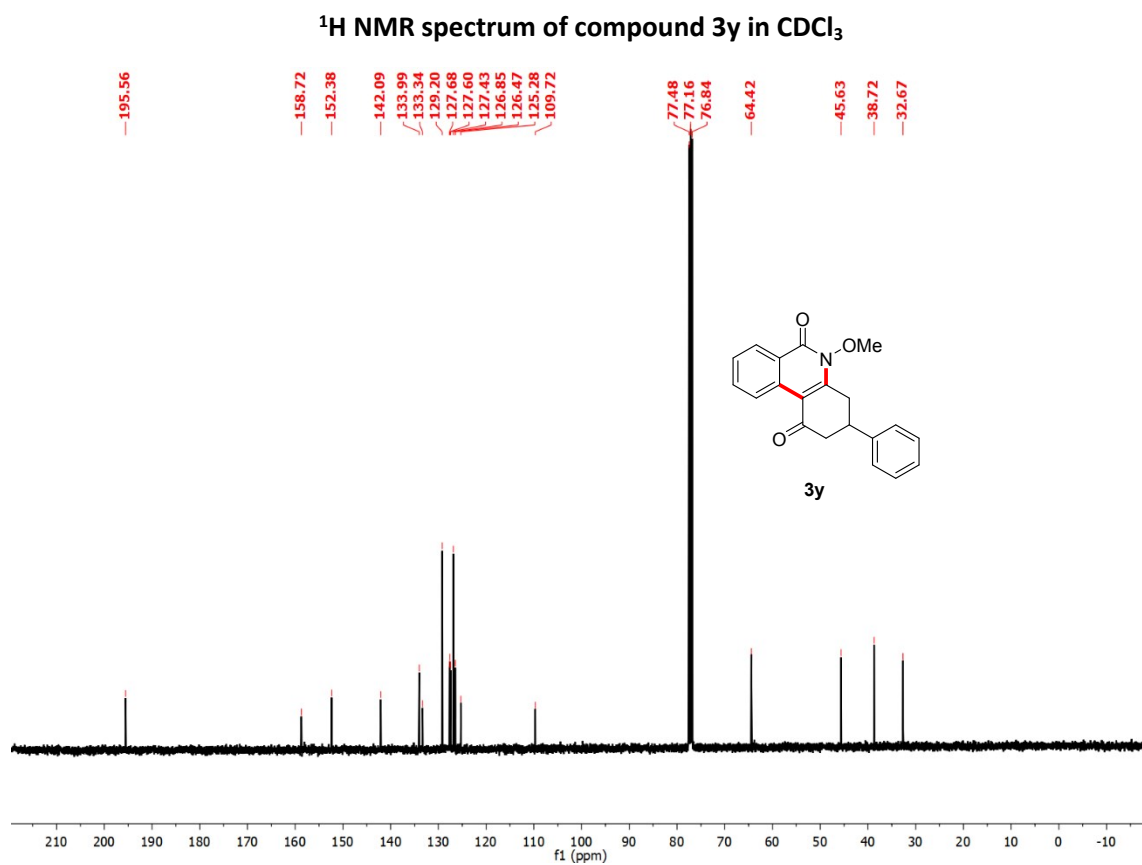

**<sup>13</sup>C NMR spectrum of compound 3y in CDCl<sub>3</sub>**

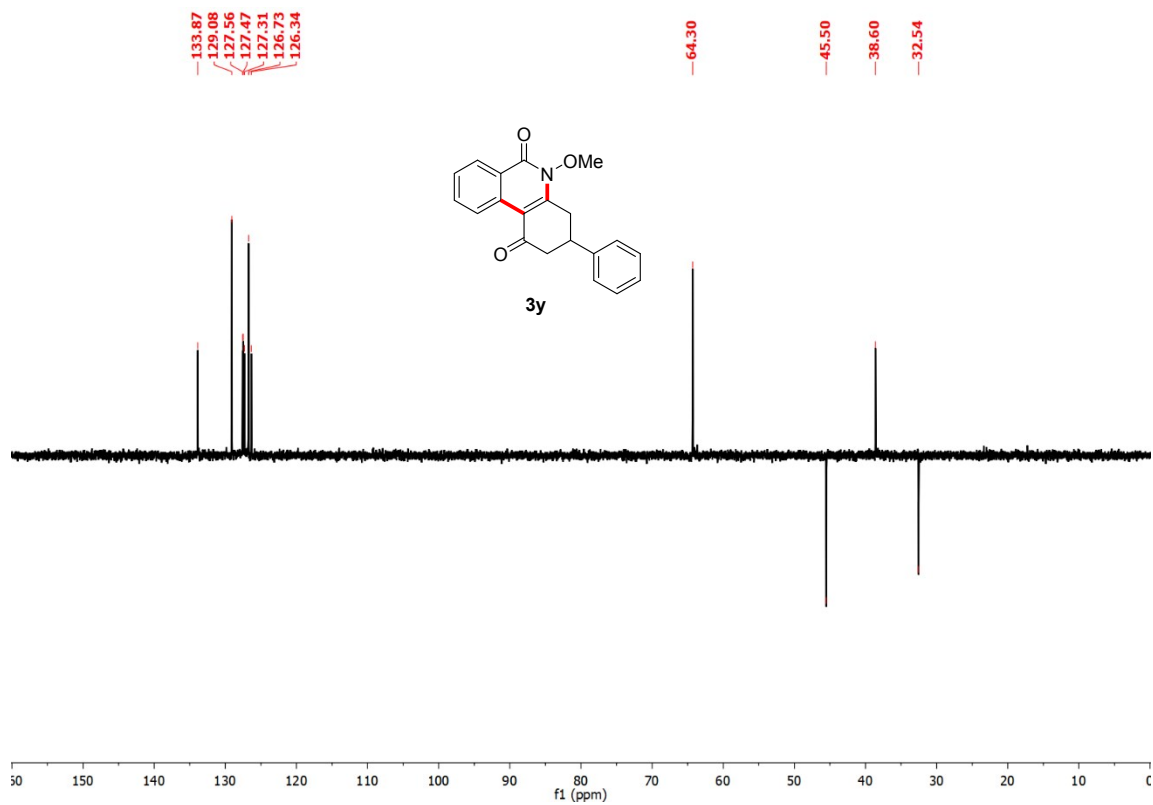

DEPT-135 NMR spectrum of compound 3y in CDCl<sub>3</sub>



# UOH -SCHOOL OF CHEMISTRY -HRMS

## Analysis Info

Analysis Name D:\Data\2018\PROF RN\DEC\NB-248R.d  
 Method tune\_low\_Pos.m  
 Sample Name NB-248-meoh  
 Comment

Acquisition Date 12/31/2018 12:25:04 PM

Operator UOH-Chemistry  
 Instrument maXis 10138

## Acquisition Parameter

Source Type ESI  
 Focus Not active  
 Scan Begin 50 m/z  
 Scan End 1500 m/z

Ion Polarity Positive  
 Set Capillary 4200 V  
 Set End Plate Offset -500 V  
 Set Collision Cell RF 350.0 Vpp

Set Nebulizer 0.3 Bar  
 Set Dry Heater 180 °C  
 Set Dry Gas 6.0 l/min  
 Set Divert Valve Waste

+MS, 0.5-0.6min #(31-34)

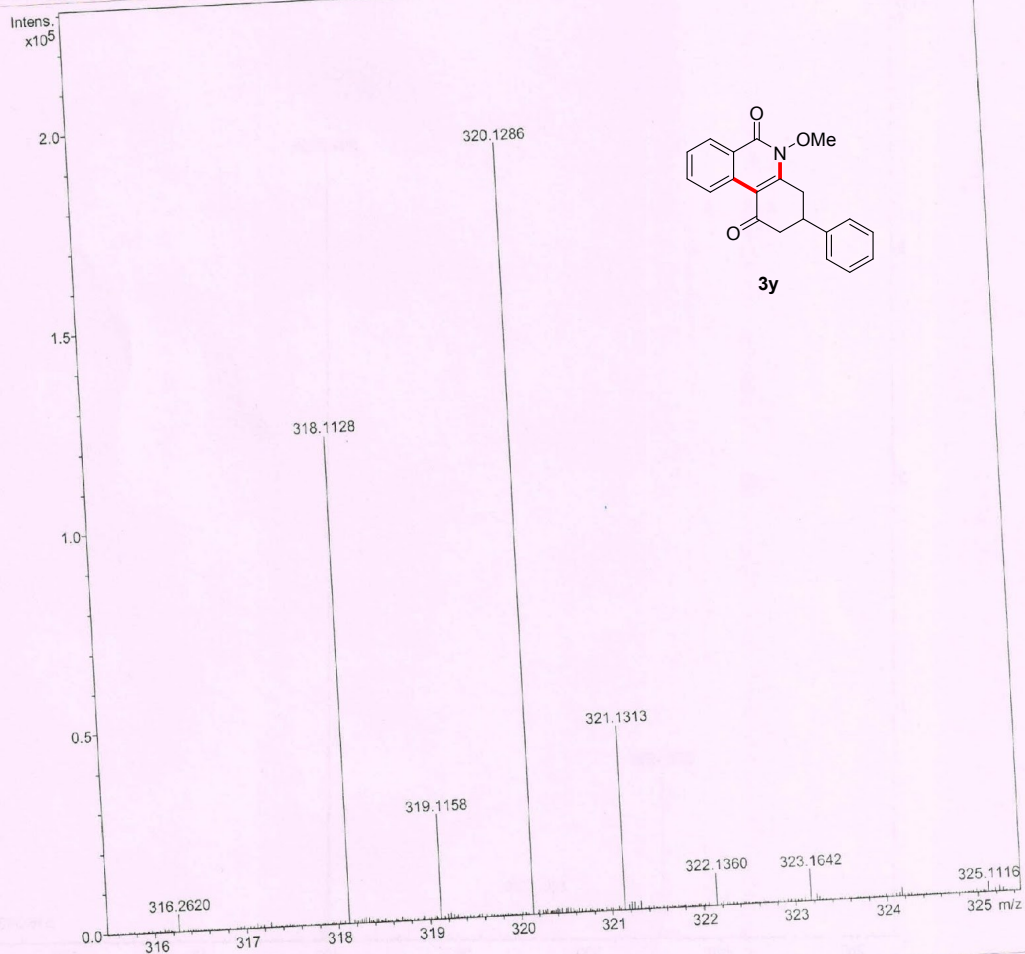

HRMS spectrum of compound 3y

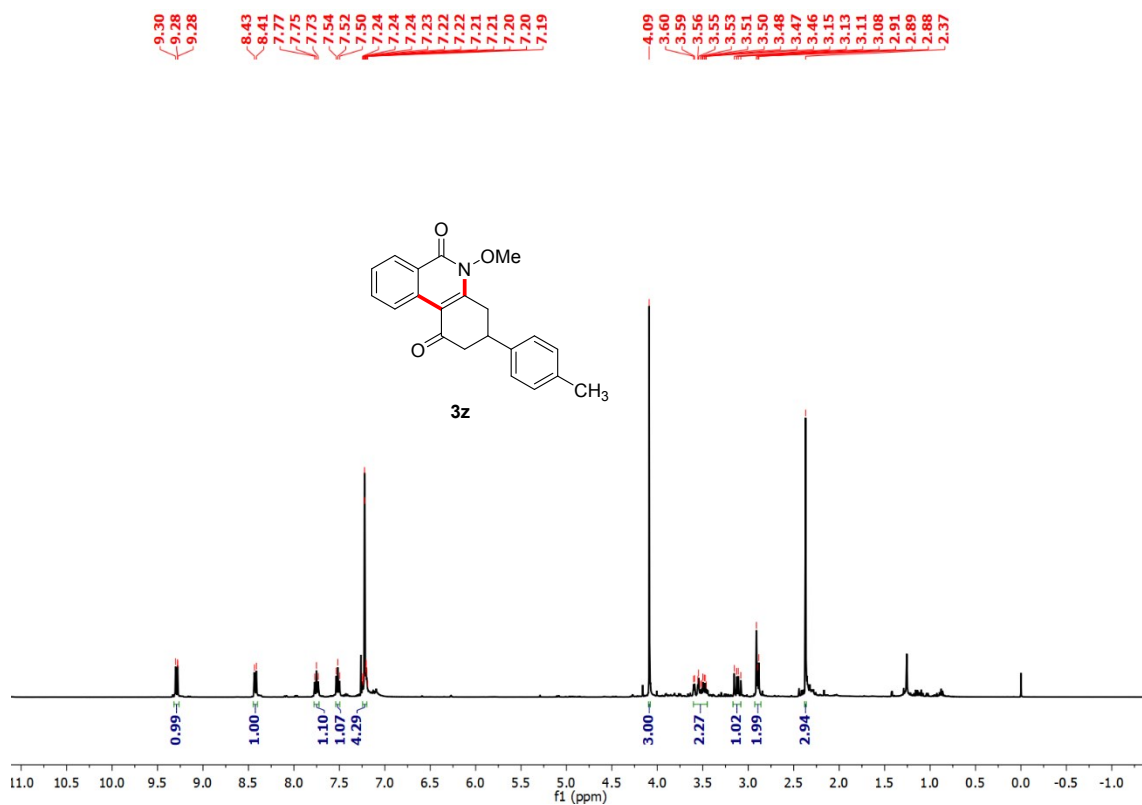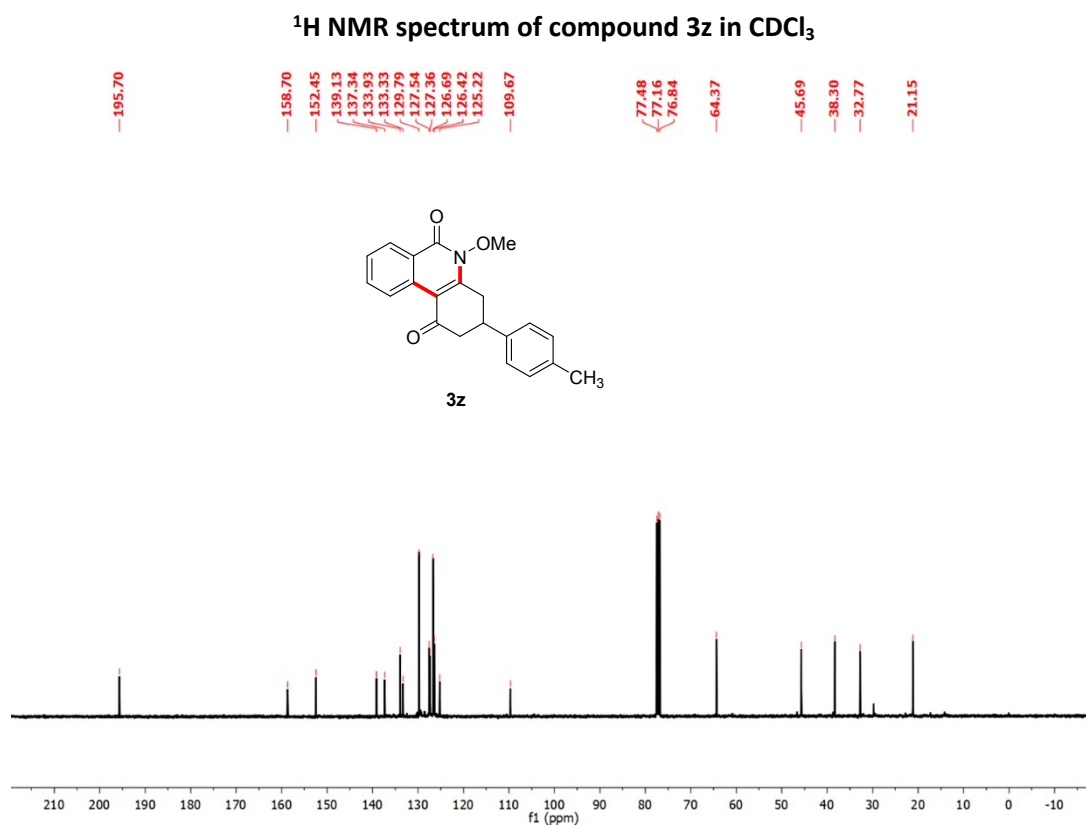

# UOH -SCHOOL OF CHEMISTRY -HRMS

## Analysis Info

Analysis Name D:\Data\2018\PROF RN\DEC\NB-236.d  
Method tune\_low\_Pos.m  
Sample Name NB-236-MEOH  
Comment

Acquisition Date 12/28/2018 11:22:24 AM

Operator UOH-Chemistry  
Instrument maXis 10138

## Acquisition Parameter

|             |            |                       |           |                  |           |
|-------------|------------|-----------------------|-----------|------------------|-----------|
| Source Type | ESI        | Ion Polarity          | Positive  | Set Nebulizer    | 0.3 Bar   |
| Focus       | Not active | Set Capillary         | 4200 V    | Set Dry Heater   | 180 °C    |
| Scan Begin  | 50 m/z     | Set End Plate Offset  | -500 V    | Set Dry Gas      | 6.0 l/min |
| Scan End    | 1500 m/z   | Set Collision Cell RF | 350.0 Vpp | Set Divert Valve | Waste     |

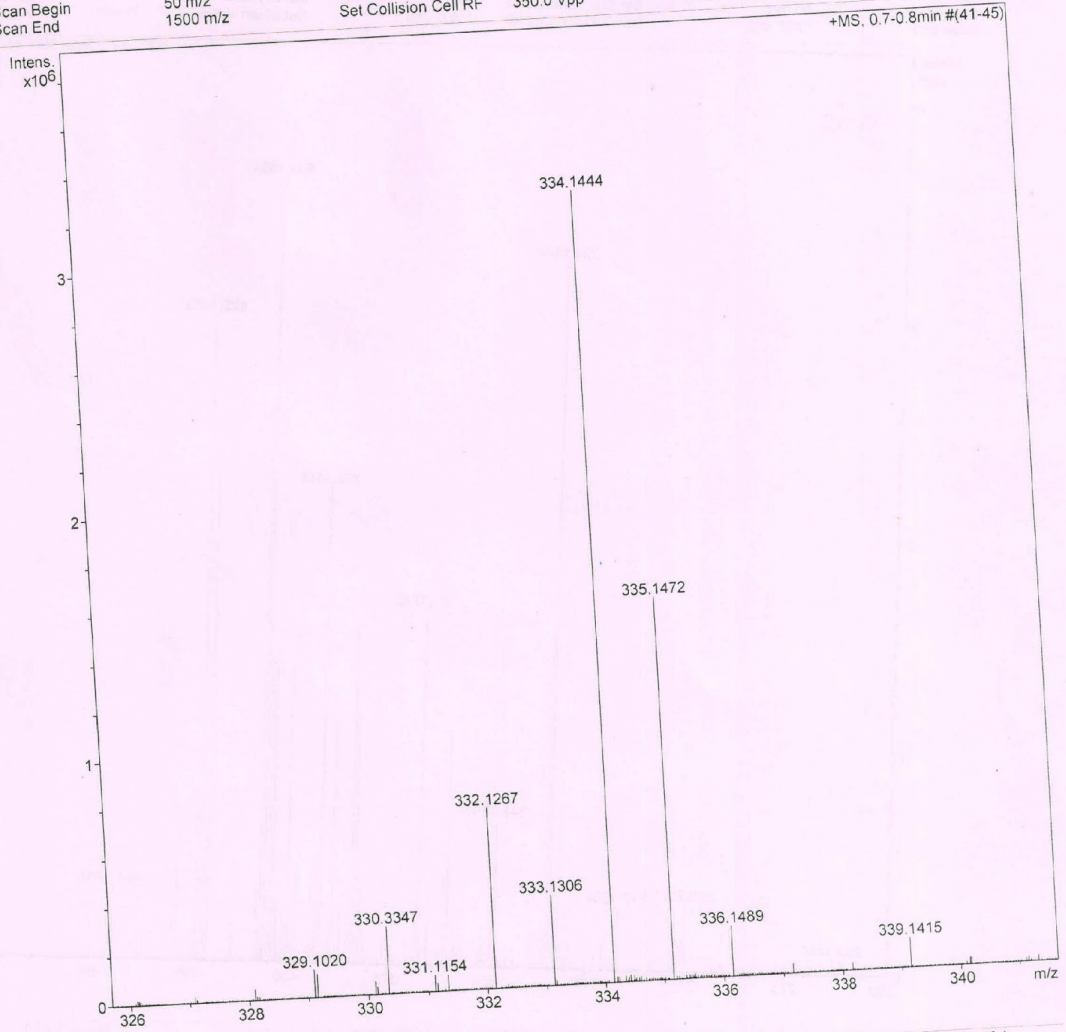

HRMS spectrum of compound 3z

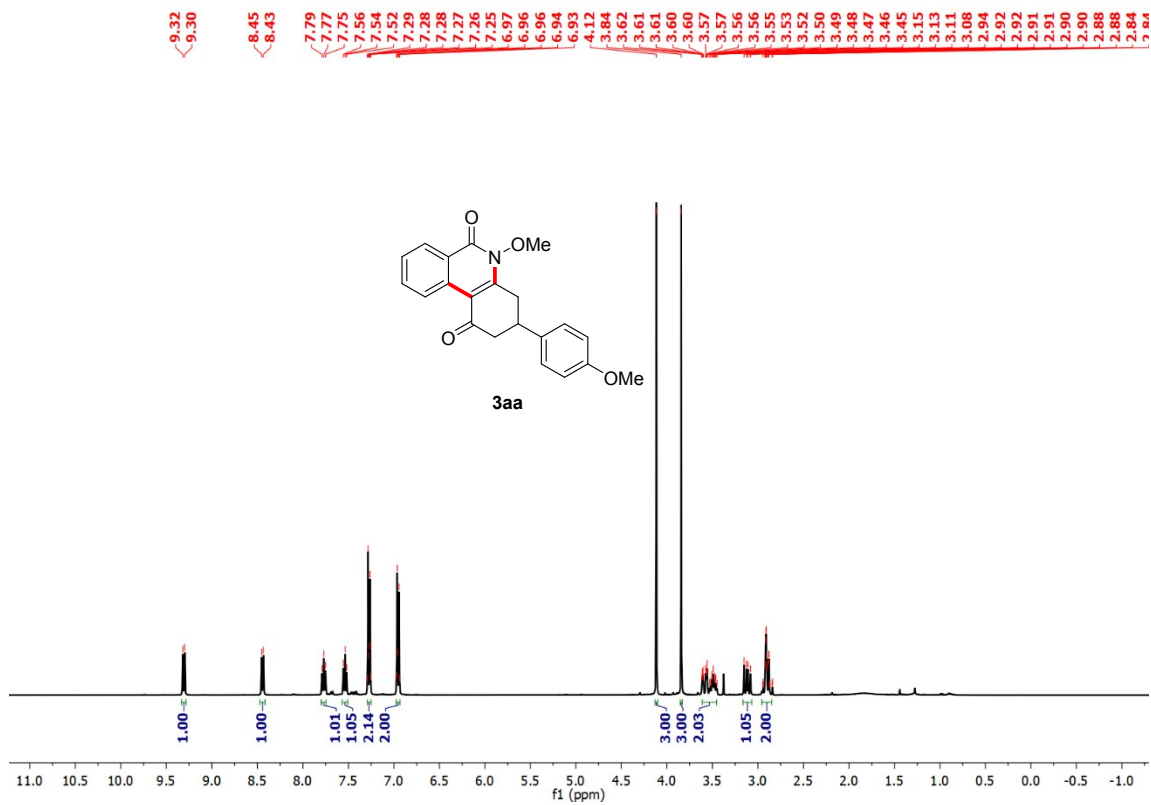

<sup>1</sup>H NMR spectrum of compound 3aa in CDCl<sub>3</sub>

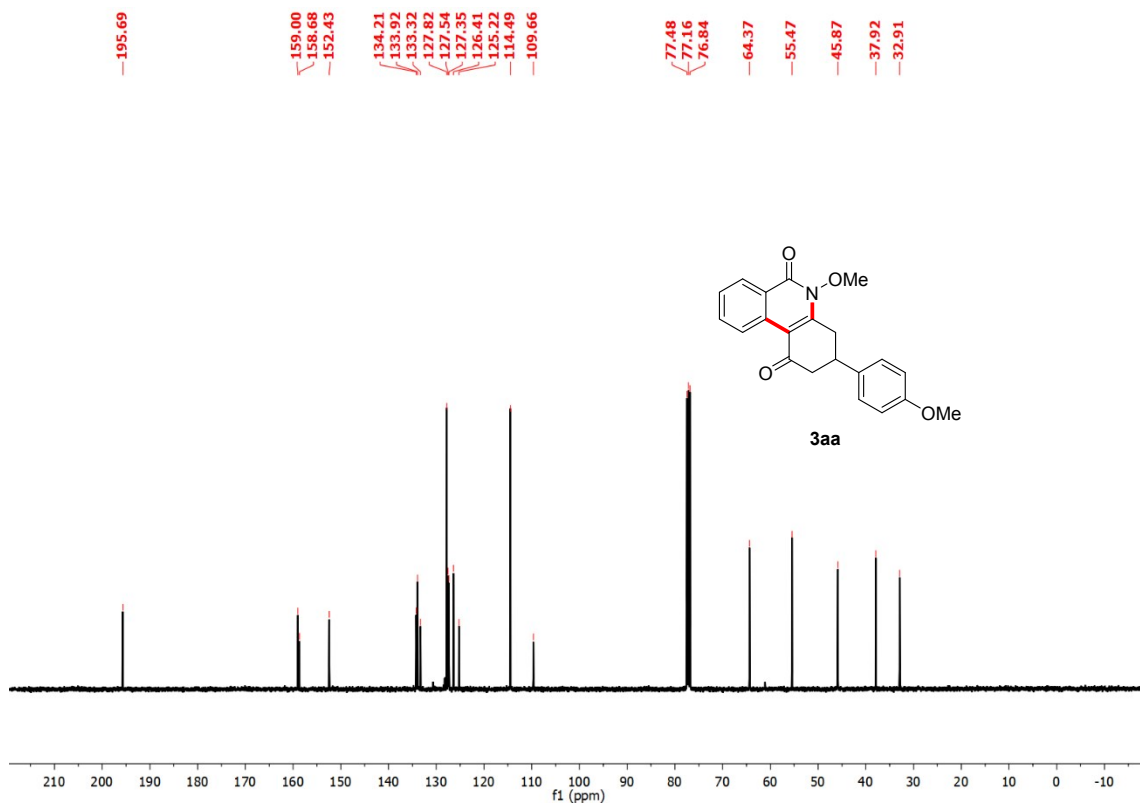

<sup>13</sup>C NMR spectrum of compound 3aa in CDCl<sub>3</sub>

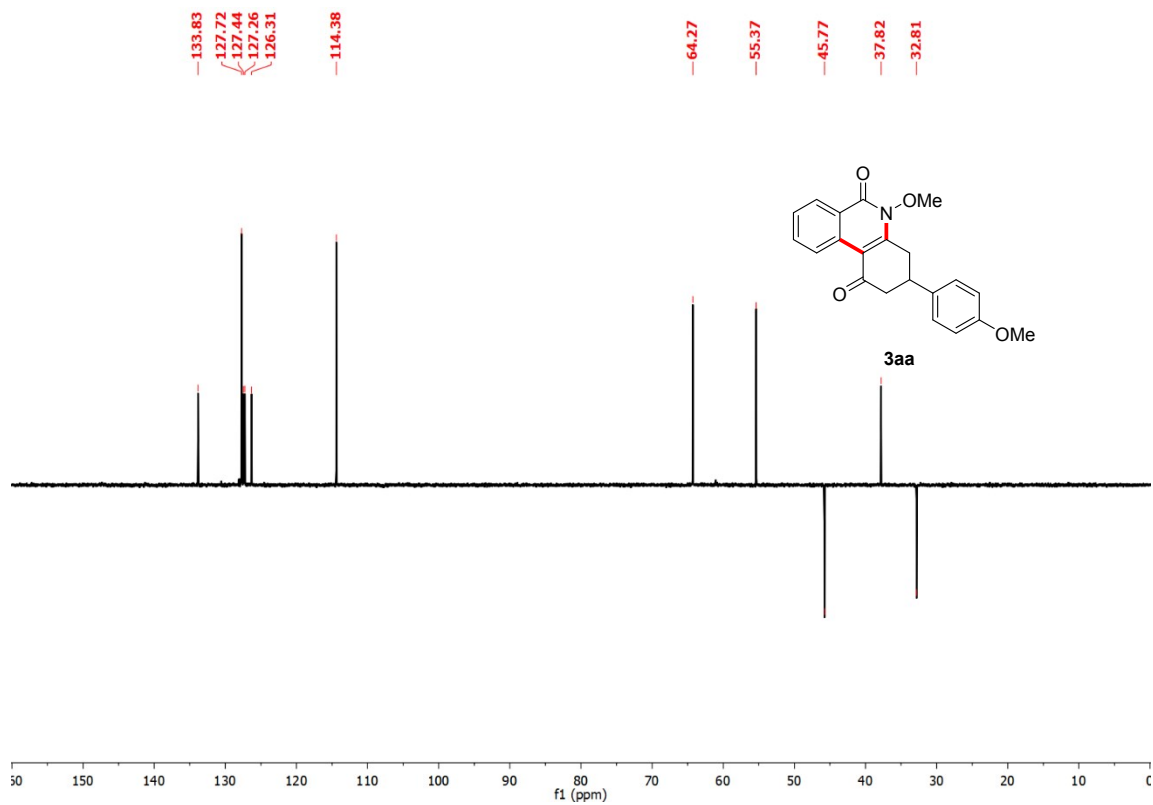

DEPT-135 NMR spectrum of compound 3aa in CDCl<sub>3</sub>

## UOH -SCHOOL OF CHEMISTRY -HRMS

### Analysis Info

Analysis Name D:\Data\2018\PROF RNIDEC\ASB-52.d  
 Method tune\_low\_Pos-R2.m  
 Sample Name ASB-52-CHCL3-ACN  
 Comment

Acquisition Date 12/4/2018 11:36:25 AM

Operator UOH-Chemistry  
 Instrument maXis 10138

### Acquisition Parameter

|             |            |                       |           |                  |           |
|-------------|------------|-----------------------|-----------|------------------|-----------|
| Source Type | ESI        | Ion Polarity          | Positive  | Set Nebulizer    | 0.3 Bar   |
| Focus       | Not active | Set Capillary         | 4200 V    | Set Dry Heater   | 180 °C    |
| Scan Begin  | 50 m/z     | Set End Plate Offset  | -500 V    | Set Dry Gas      | 4.0 l/min |
| Scan End    | 2580 m/z   | Set Collision Cell RF | 350.0 Vpp | Set Divert Valve | Waste     |

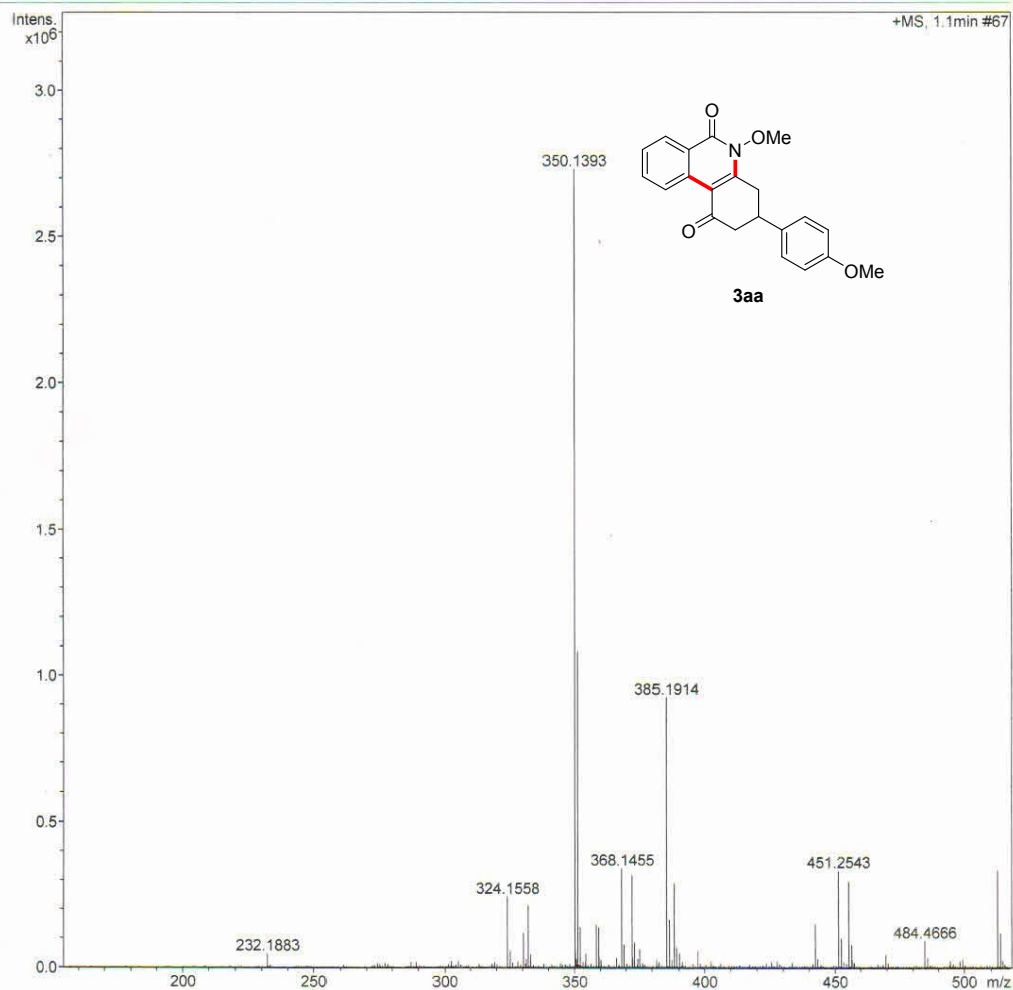

**HRMS spectrum of compound 3aa**

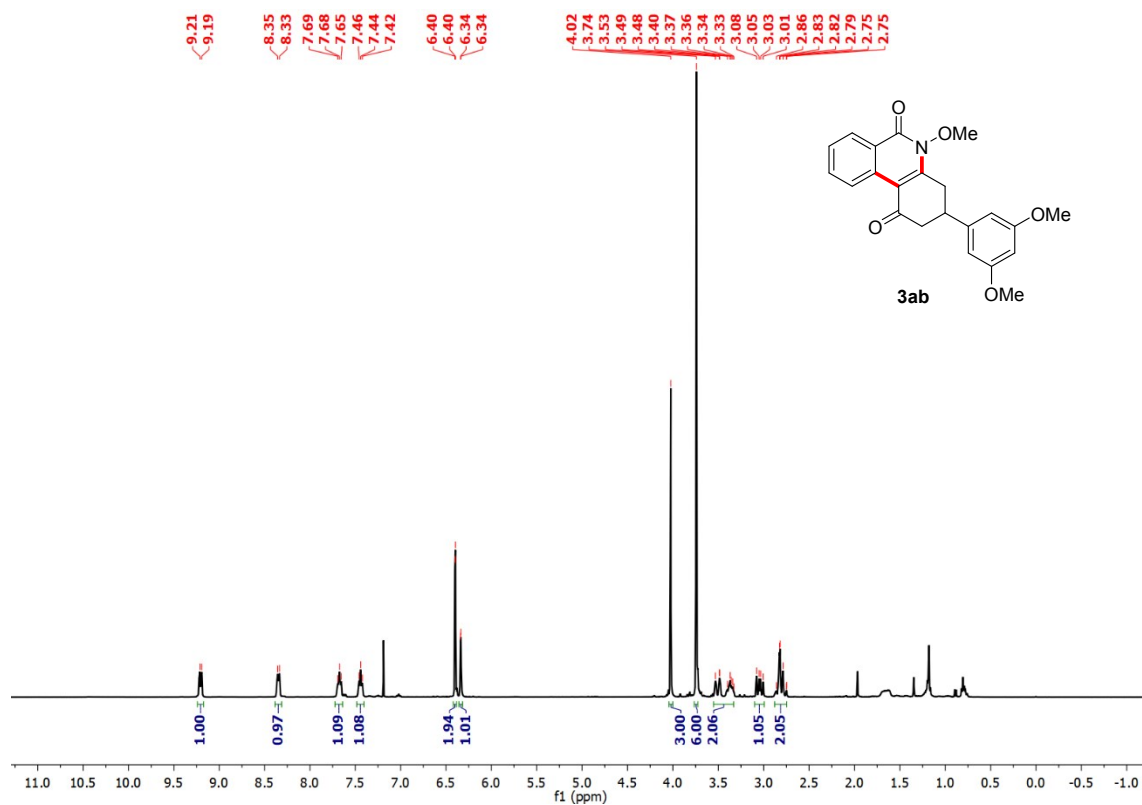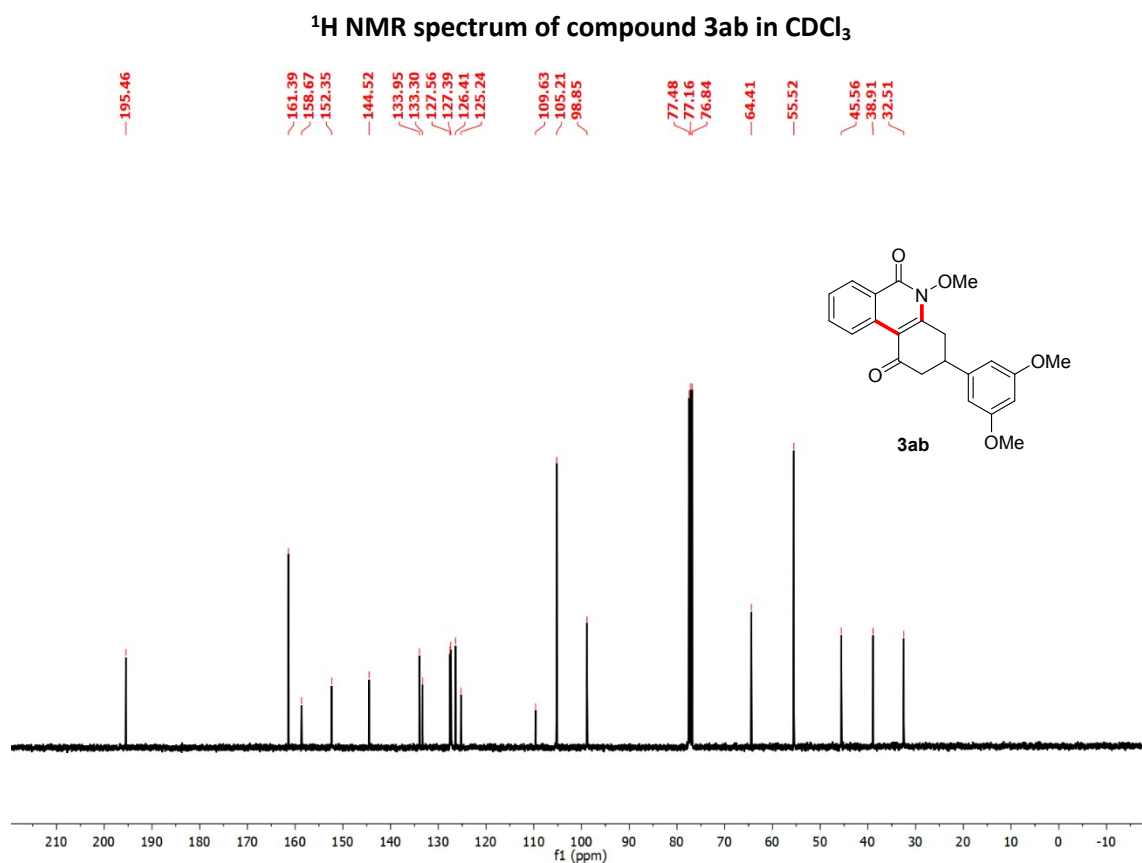

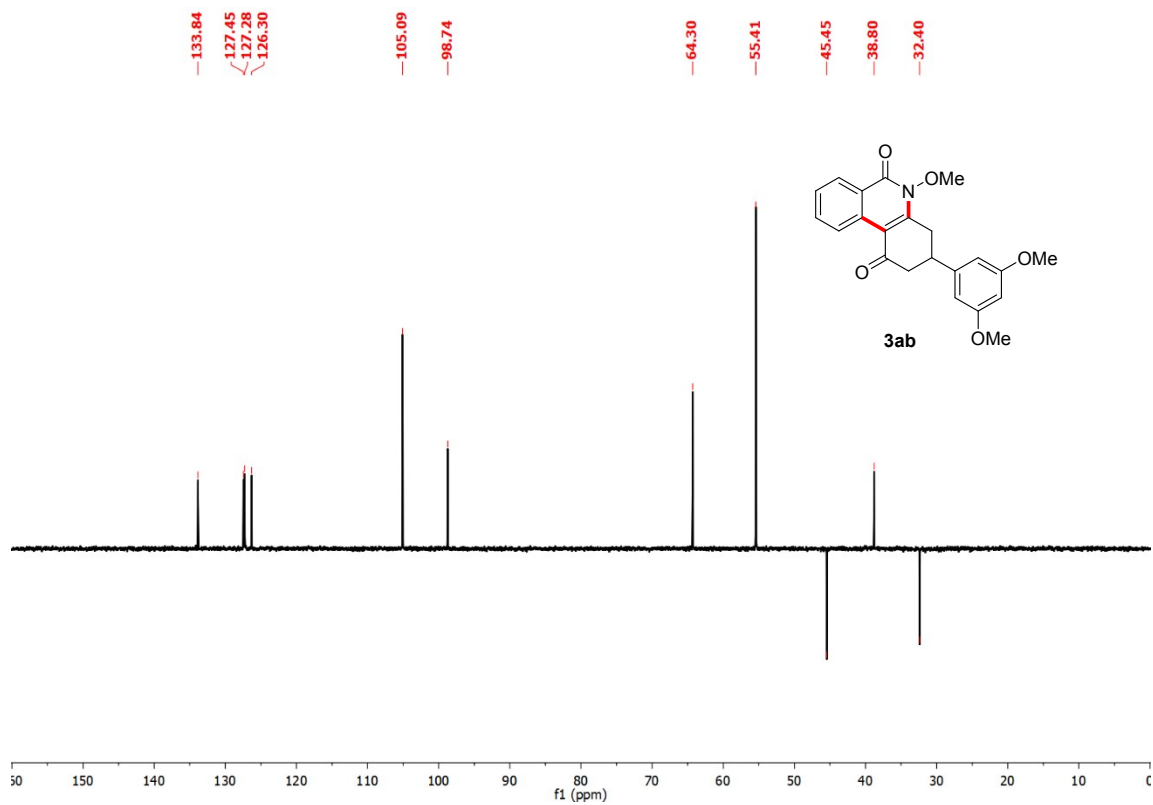

DEPT-135 NMR spectrum of compound 3ab in CDCl<sub>3</sub>



## UOH -SCHOOL OF CHEMISTRY -HRMS

|                                                 |                                         |
|-------------------------------------------------|-----------------------------------------|
| <b>Analysis Info</b>                            | Acquisition Date 12/31/2018 12:52:12 PM |
| Analysis Name D:\Data\2018\PROF RN\DEC\NB-253.d | Operator UOH-Chemistry                  |
| Method tune_low_PosR.m                          | Instrument maXis 10138                  |
| Sample Name NB-253-meoh                         |                                         |
| Comment                                         |                                         |

### Acquisition Parameter

|             |            |                       |           |
|-------------|------------|-----------------------|-----------|
| Source Type | ESI        | Ion Polarity          | Positive  |
| Focus       | Not active | Set Capillary         | 3800 V    |
| Scan Begin  | 200 m/z    | Set End Plate Offset  | -500 V    |
| Scan End    | 2500 m/z   | Set Collision Cell RF | 350.0 Vpp |
|             |            | Set Nebulizer         | 0.3 Bar   |
|             |            | Set Dry Heater        | 250 °C    |
|             |            | Set Dry Gas           | 5.0 l/min |
|             |            | Set Divert Valve      | Waste     |

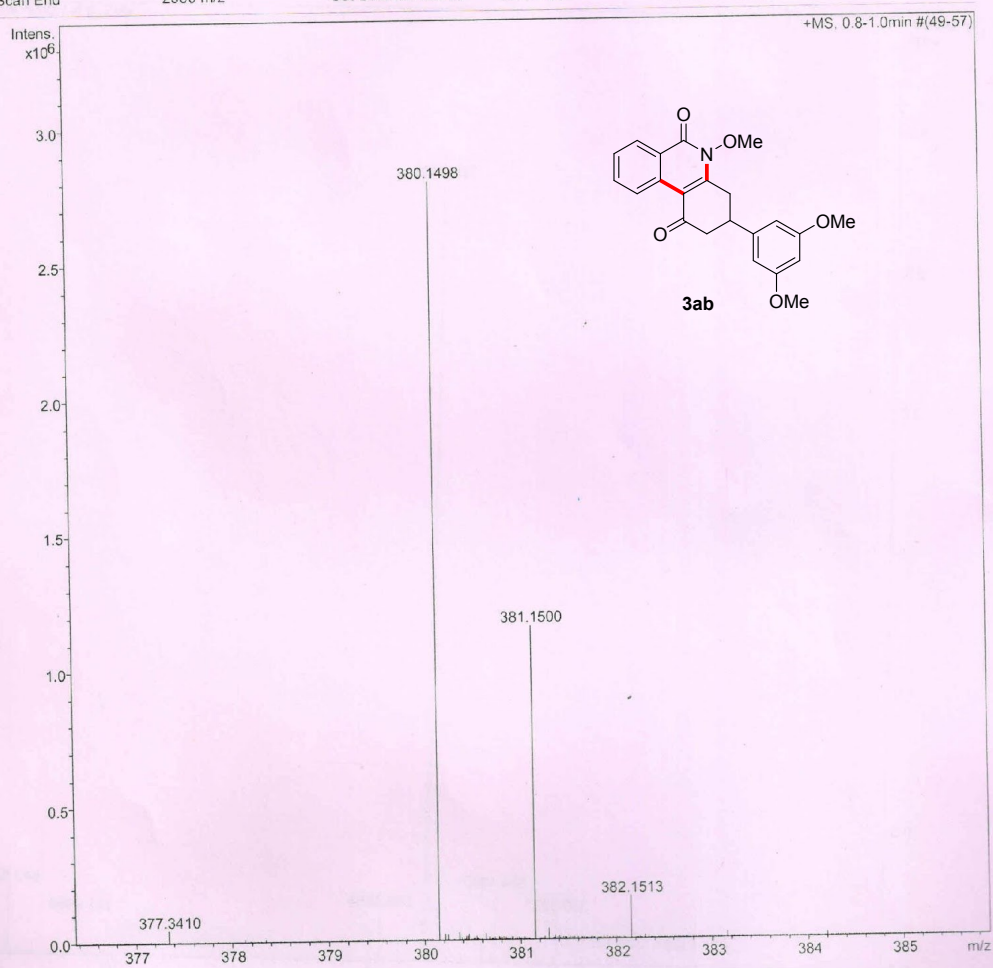

**HRMS spectrum of compound 3ab**

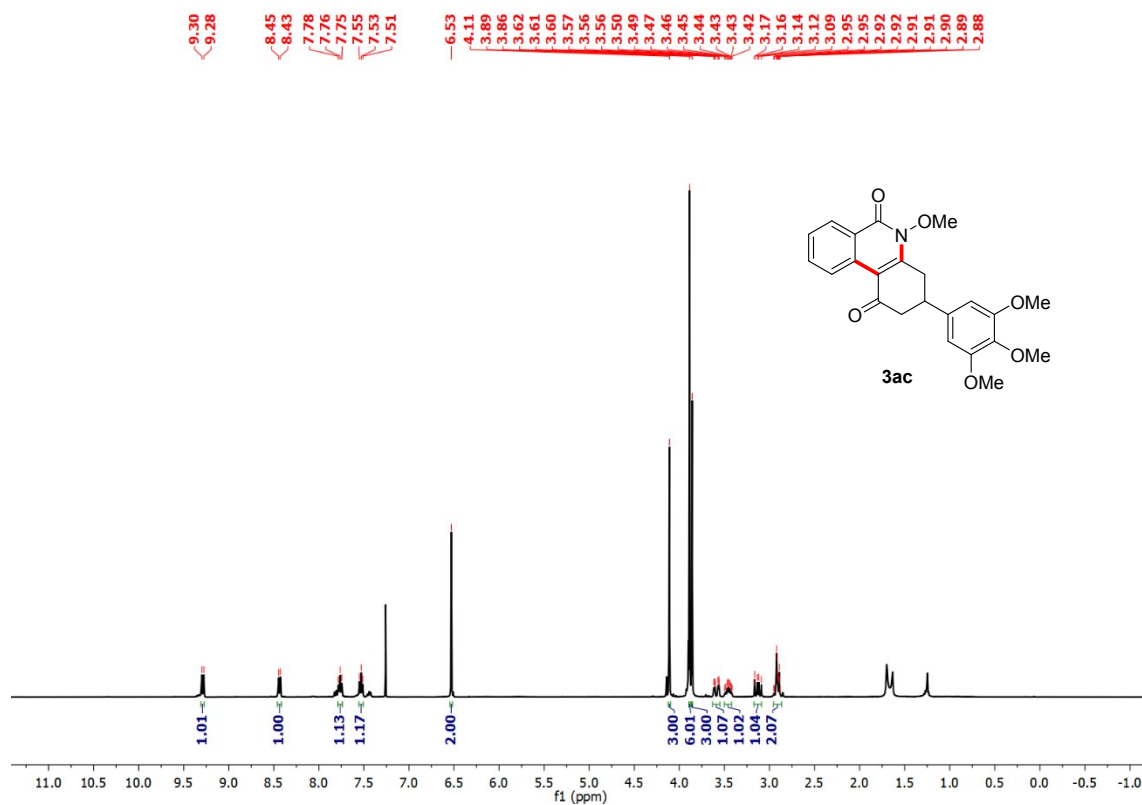

**<sup>1</sup>H NMR spectrum of compound 3ac in CDCl<sub>3</sub>**

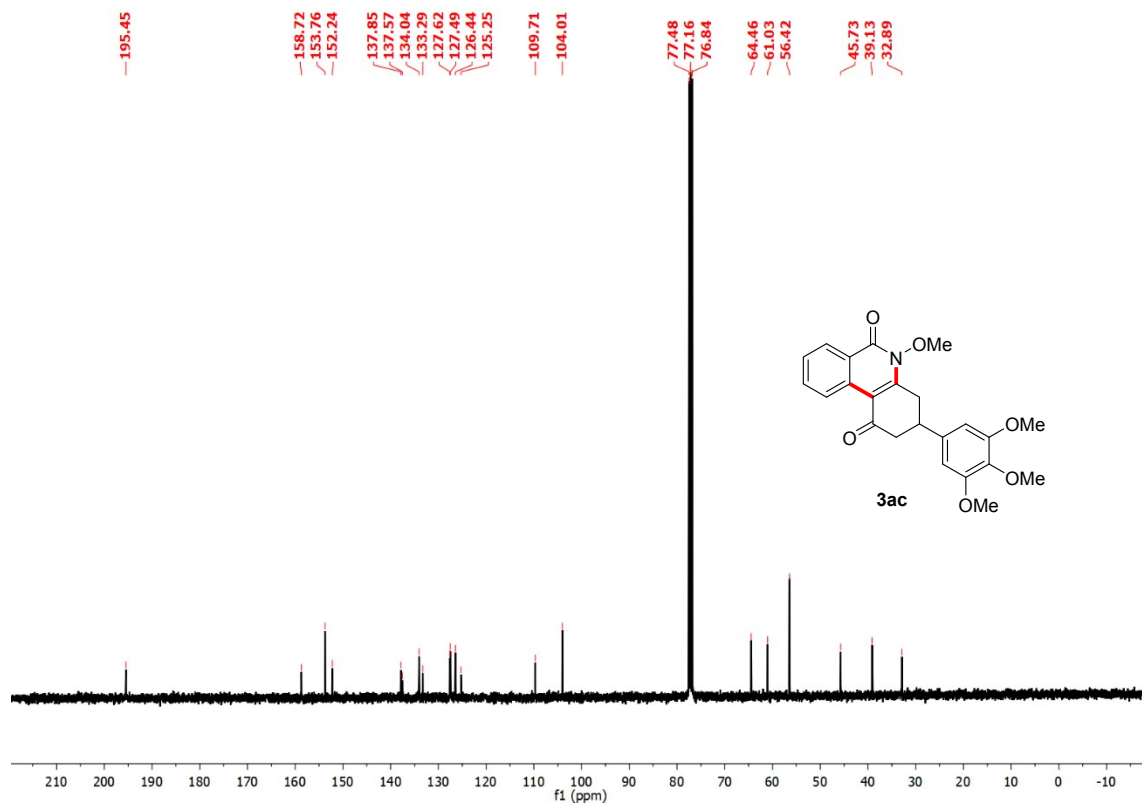

**<sup>13</sup>C NMR spectrum of compound 3ac in CDCl<sub>3</sub>**

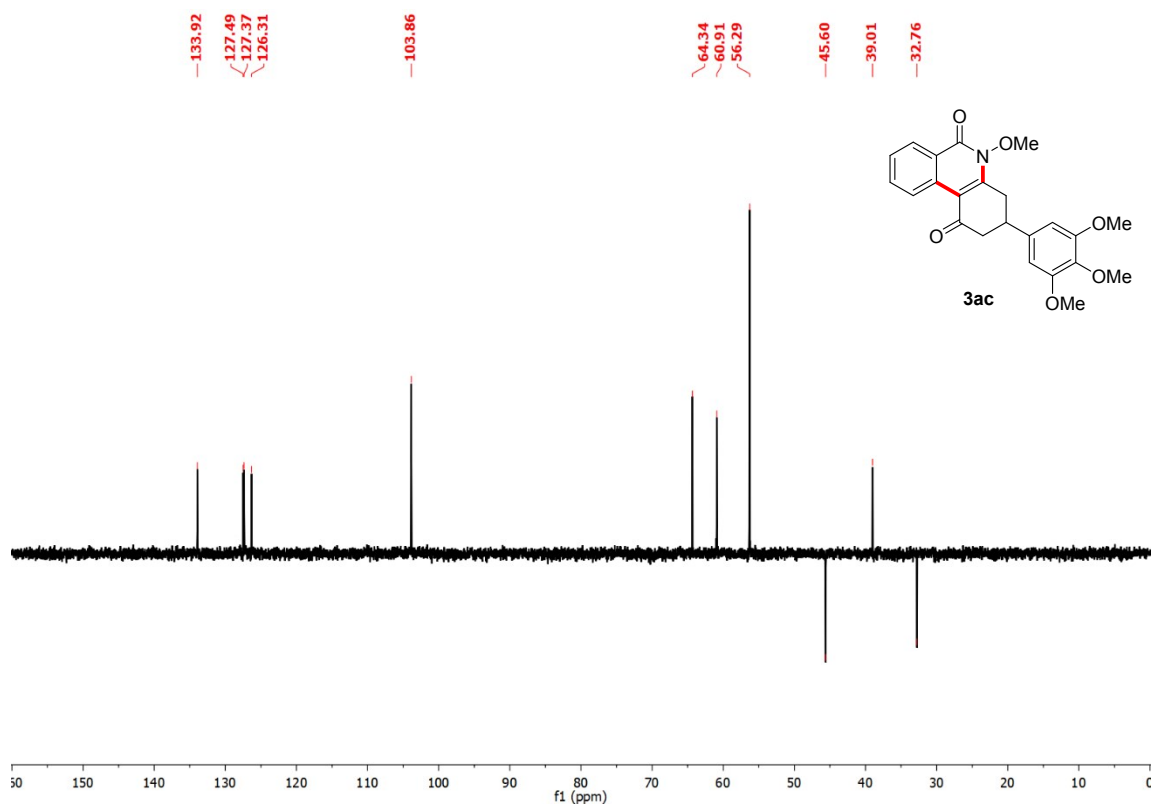

DEPT-135 NMR spectrum of compound 3ac in CDCl<sub>3</sub>

## UOH -SCHOOL OF CHEMISTRY -HRMS

### Analysis Info

Analysis Name D:\Data\2018\PROF RN\DEC\NB-246.d  
 Method tune\_low.m  
 Sample Name NB-246-meoh  
 Comment

Acquisition Date 12/31/2018 1:00:06 PM

Operator UOH-Chemistry  
 Instrument maXis 10138

### Acquisition Parameter

|             |            |                       |           |                  |           |
|-------------|------------|-----------------------|-----------|------------------|-----------|
| Source Type | ESI        | Ion Polarity          | Positive  | Set Nebulizer    | 0.4 Bar   |
| Focus       | Not active | Set Capillary         | 3800 V    | Set Dry Heater   | 200 °C    |
| Scan Begin  | 50 m/z     | Set End Plate Offset  | -500 V    | Set Dry Gas      | 6.0 l/min |
| Scan End    | 1800 m/z   | Set Collision Cell RF | 350.0 Vpp | Set Divert Valve | Waste     |

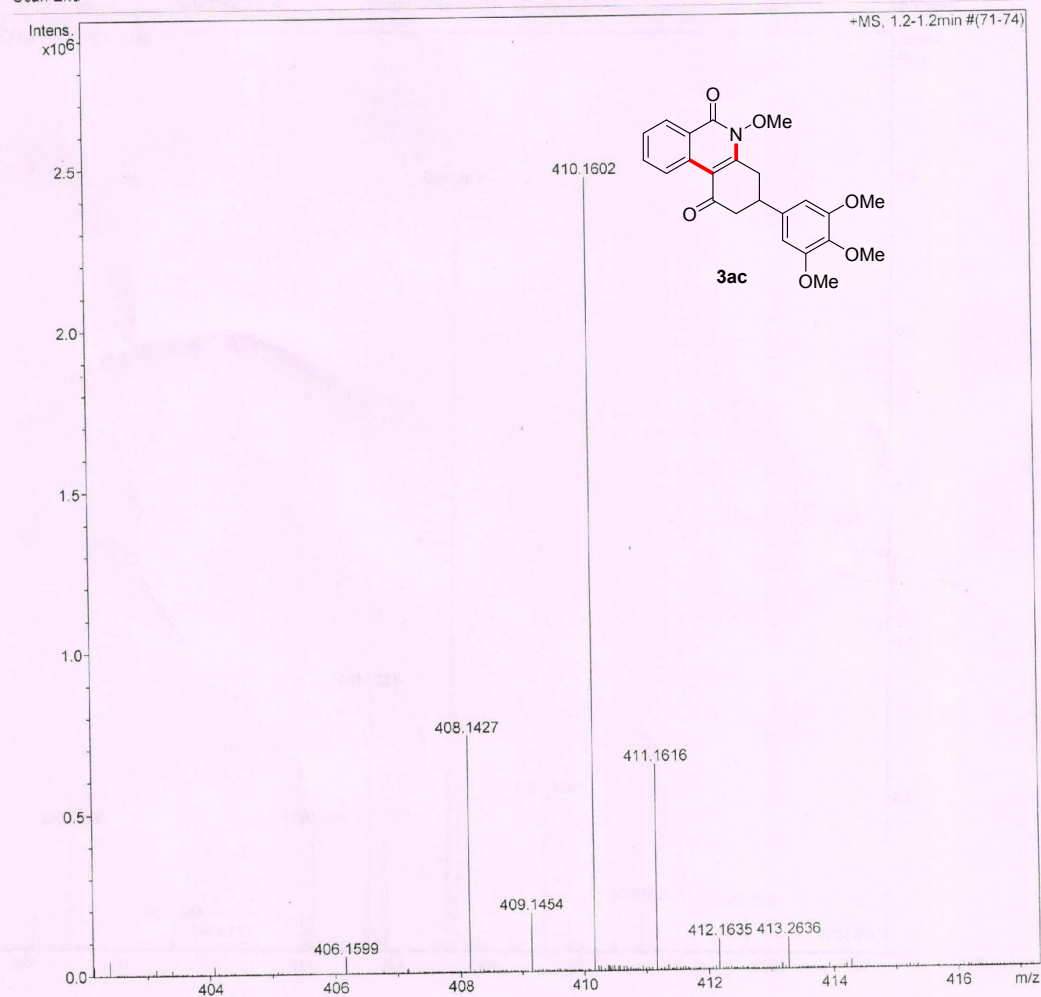

**HRMS spectrum of compound 3ac**

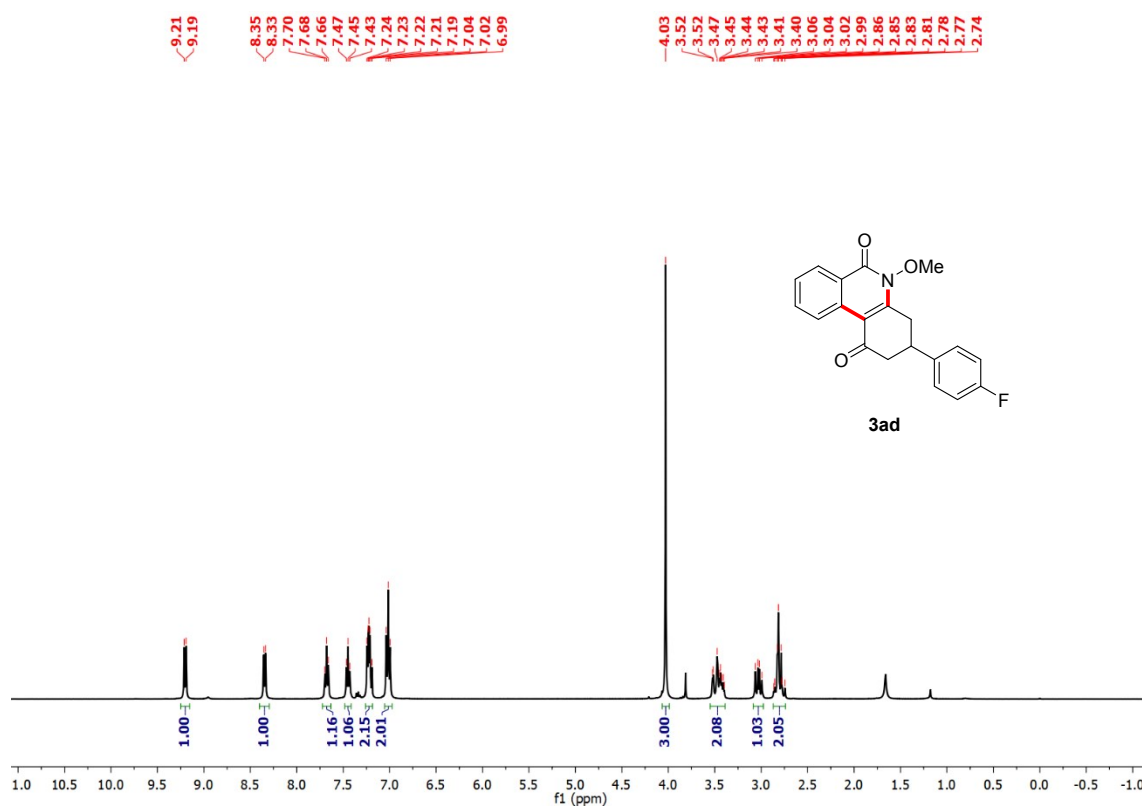

**<sup>1</sup>H NMR spectrum of compound 3ad in CDCl<sub>3</sub>**

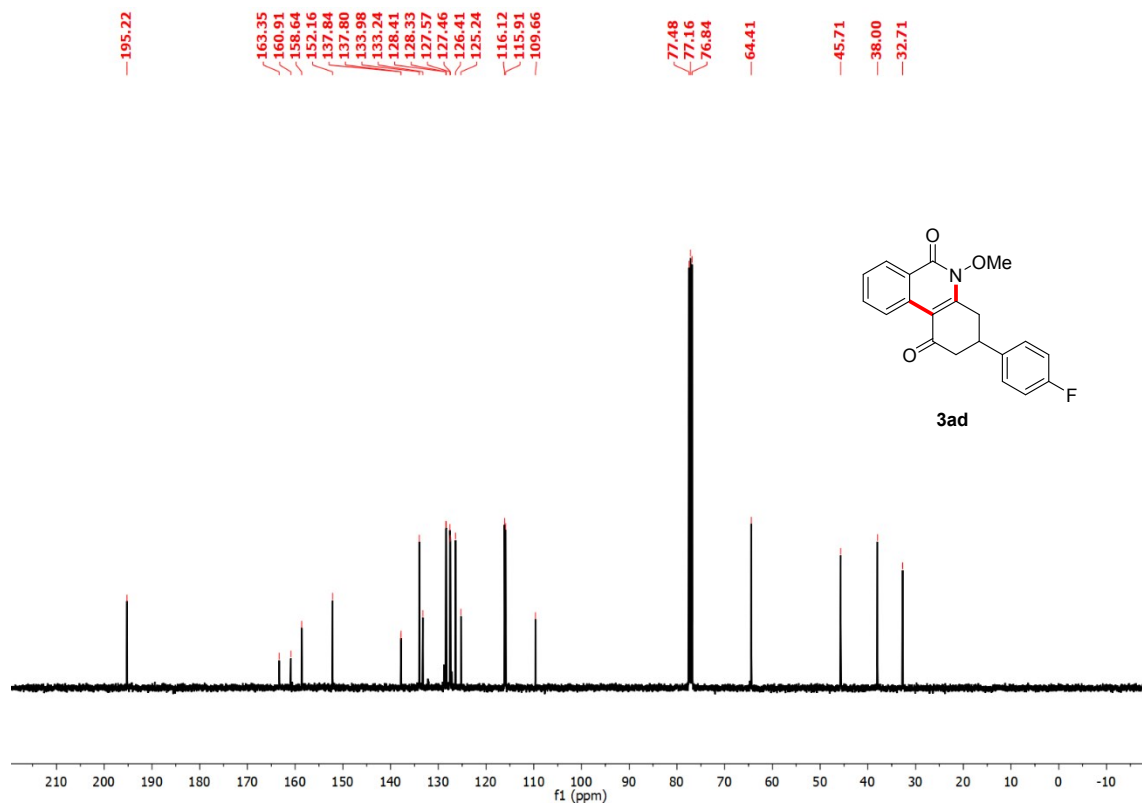

**<sup>13</sup>C NMR spectrum of compound 3ad in CDCl<sub>3</sub>**

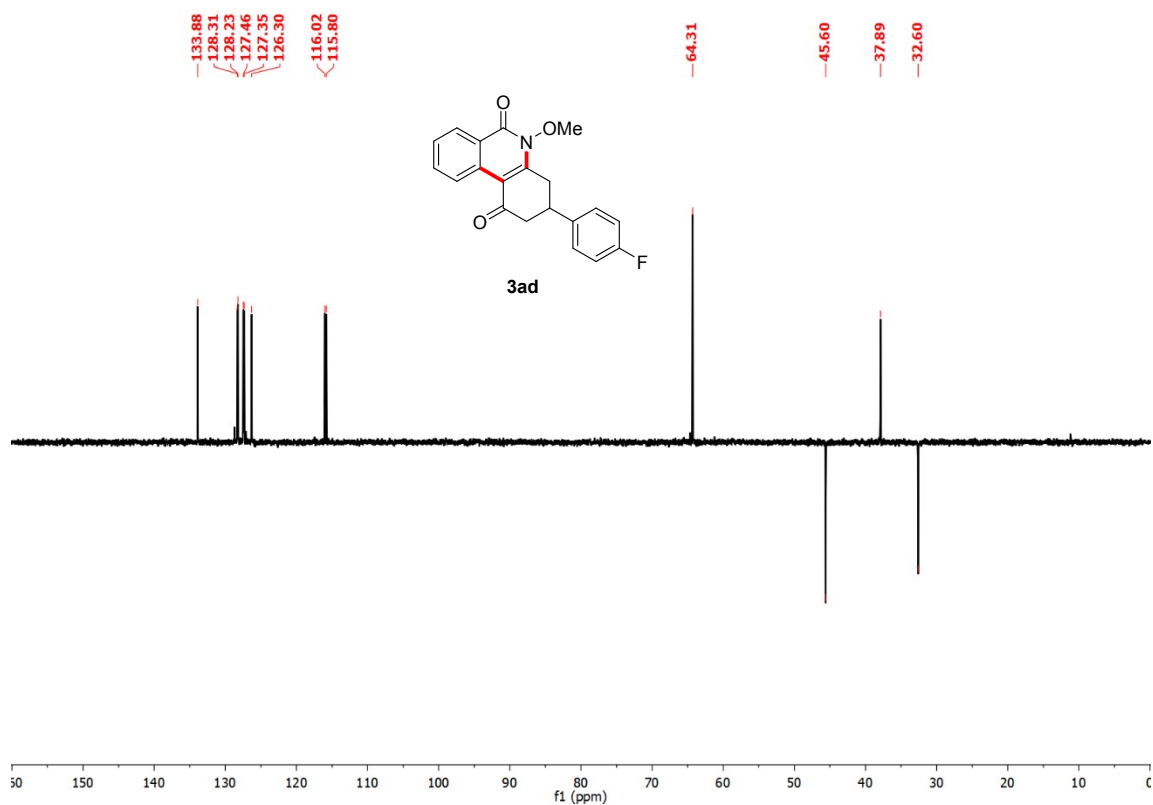

DEPT-135 NMR spectrum of compound 3ad in CDCl<sub>3</sub>

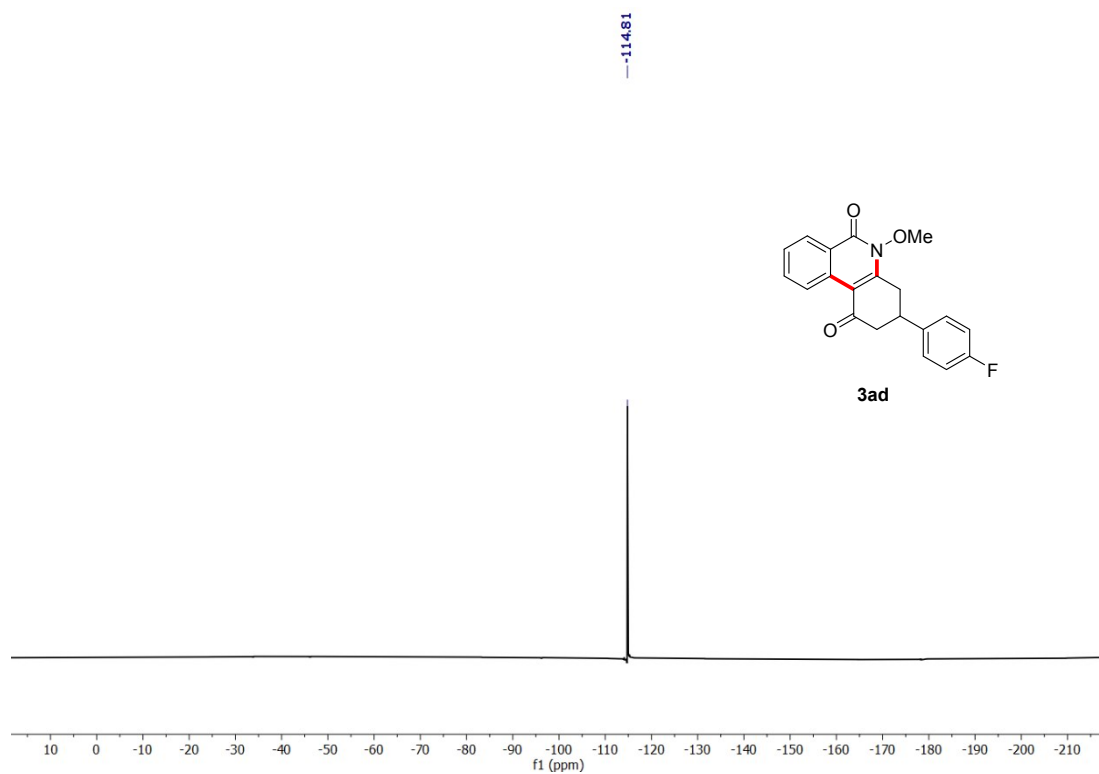

<sup>19</sup>F NMR spectrum of compound 3ad in CDCl<sub>3</sub>



# UOH -SCHOOL OF CHEMISTRY -HRMS

**Analysis Info**

Analysis Name D:\Data\2018\PROF RN\DEC\NB-240R.d  
 Method tune\_low\_Pos.m  
 Sample Name NB-240-meoh  
 Comment

Acquisition Date 12/31/2018 12:40:32 PM

Operator UOH-Chemistry  
 Instrument maXis 10138

**Acquisition Parameter**

|             |            |                       |           |                  |           |
|-------------|------------|-----------------------|-----------|------------------|-----------|
| Source Type | ESI        | Ion Polarity          | Positive  | Set Nebulizer    | 0.3 Bar   |
| Focus       | Not active | Set Capillary         | 2600 V    | Set Dry Heater   | 180 °C    |
| Scan Begin  | 50 m/z     | Set End Plate Offset  | -500 V    | Set Dry Gas      | 4.0 l/min |
| Scan End    | 1500 m/z   | Set Collision Cell RF | 200.0 Vpp | Set Divert Valve | Waste     |

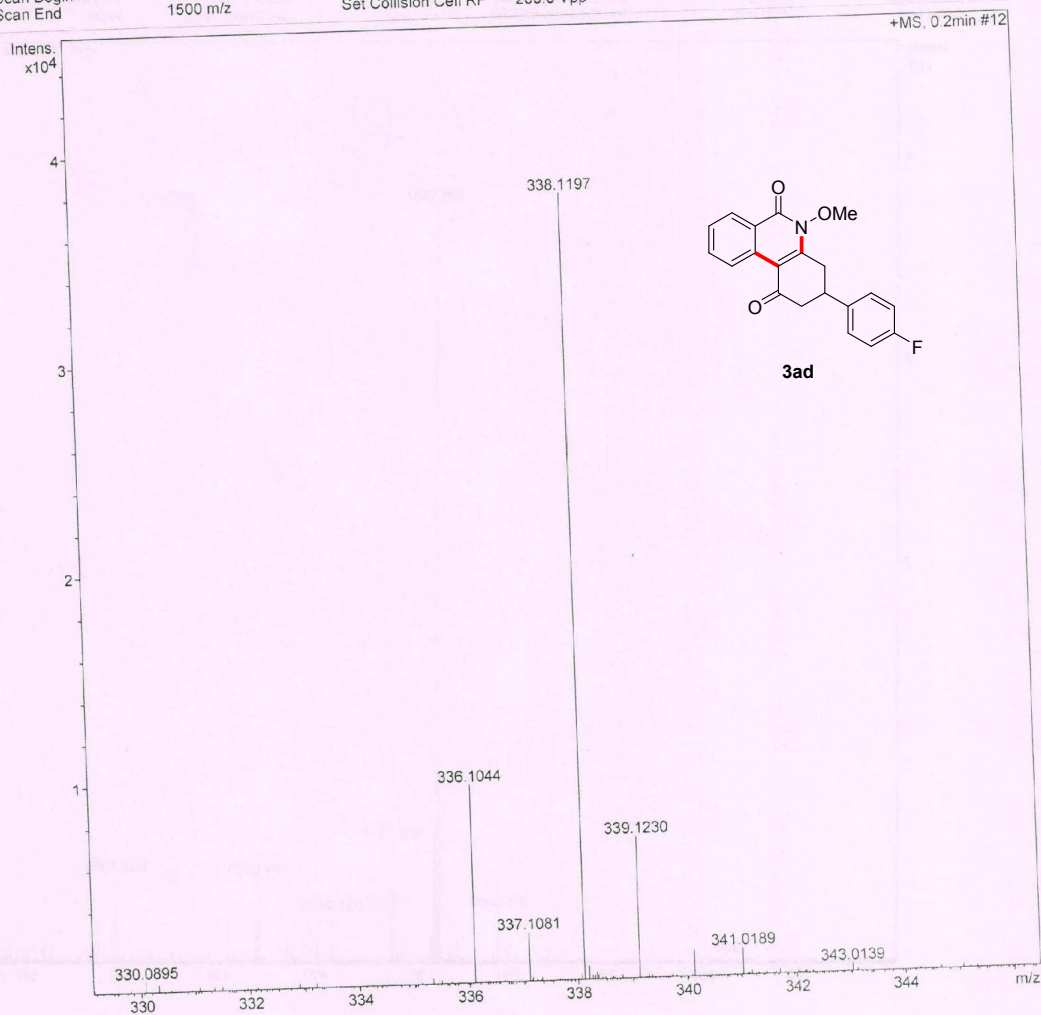

**HRMS spectrum of compound 3ad**

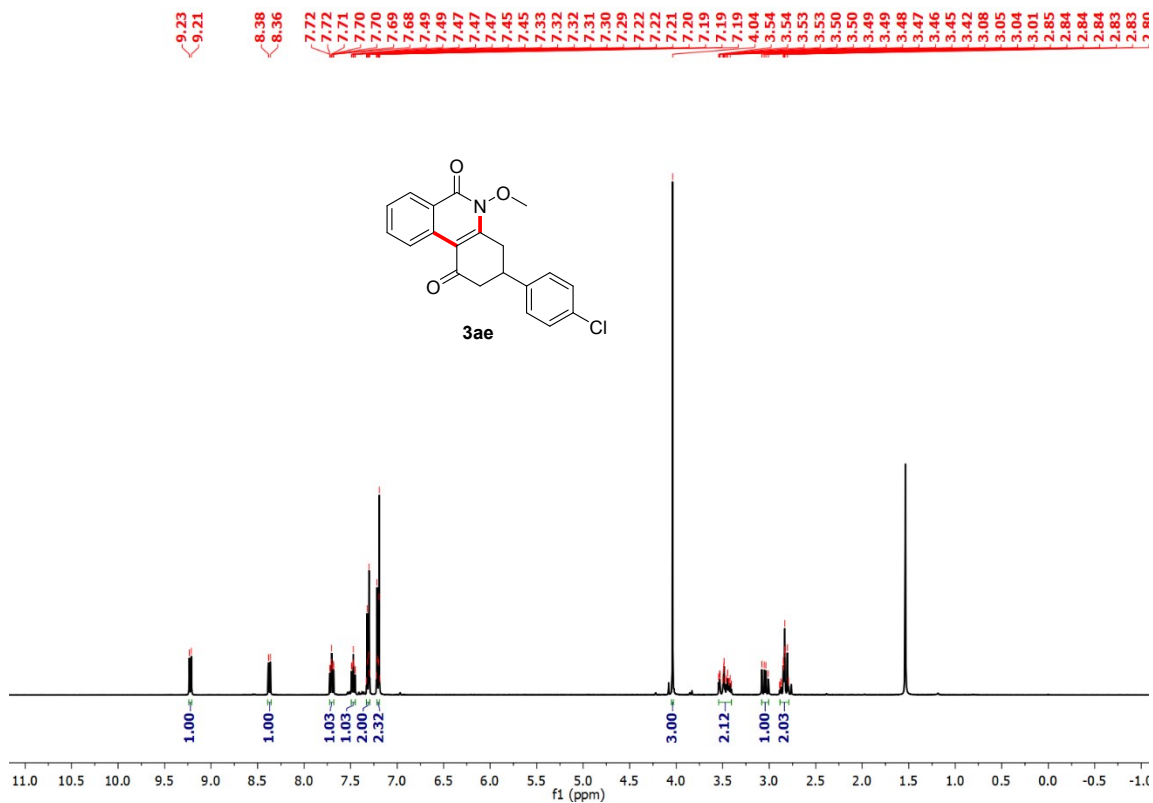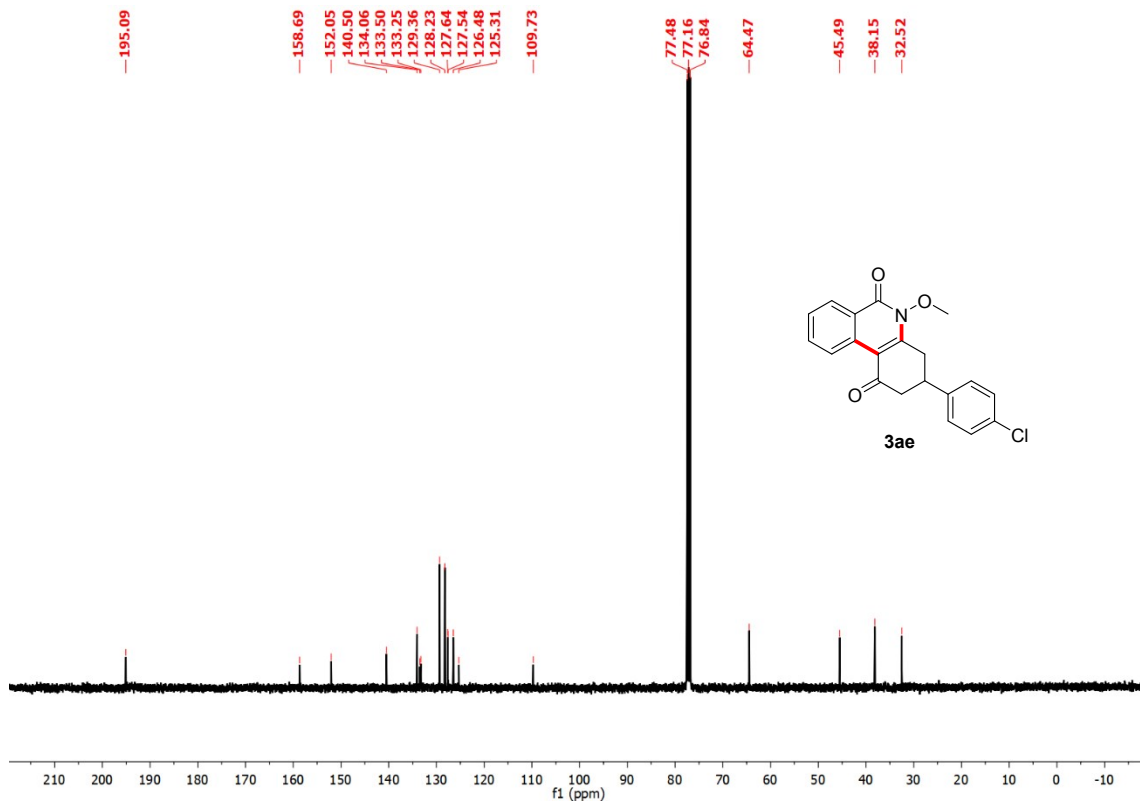



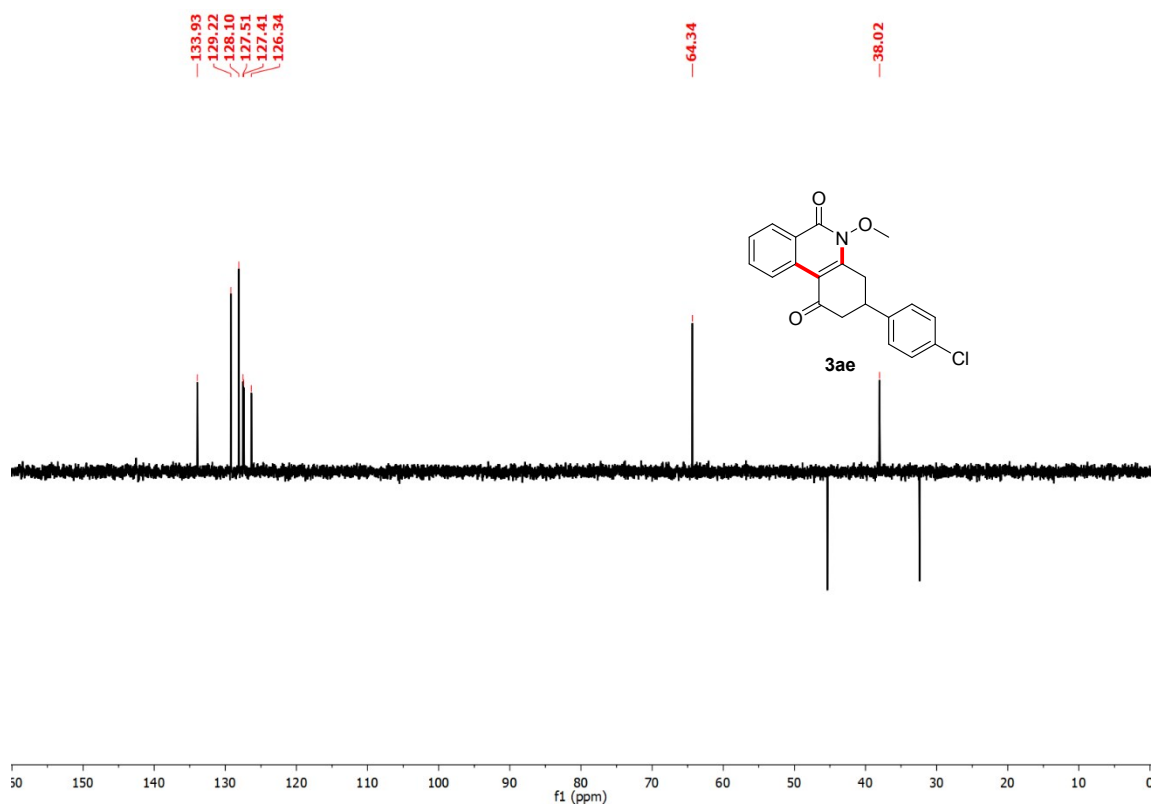

DEPT-135 NMR spectrum of compound 3ae in CDCl<sub>3</sub>

# UOH -SCHOOL OF CHEMISTRY -HRMS

## Analysis Info

Analysis Name D:\Data\2018\PROF RN\NOVIW-241r2.d  
Method tune\_low\_Pos.m  
Sample Name IW-241-CHCL3-ACN  
Comment

Acquisition Date 11/13/2018 12:00:42 PM

Operator UOH-Chemistry  
Instrument maXis 10138

## Acquisition Parameter

|             |            |                       |           |                  |           |
|-------------|------------|-----------------------|-----------|------------------|-----------|
| Source Type | ESI        | Ion Polarity          | Positive  | Set Nebulizer    | 0.3 Bar   |
| Focus       | Not active | Set Capillary         | 4200 V    | Set Dry Heater   | 180 °C    |
| Scan Begin  | 50 m/z     | Set End Plate Offset  | -500 V    | Set Dry Gas      | 6.0 l/min |
| Scan End    | 1500 m/z   | Set Collision Cell RF | 350.0 Vpp | Set Divert Valve | Waste     |

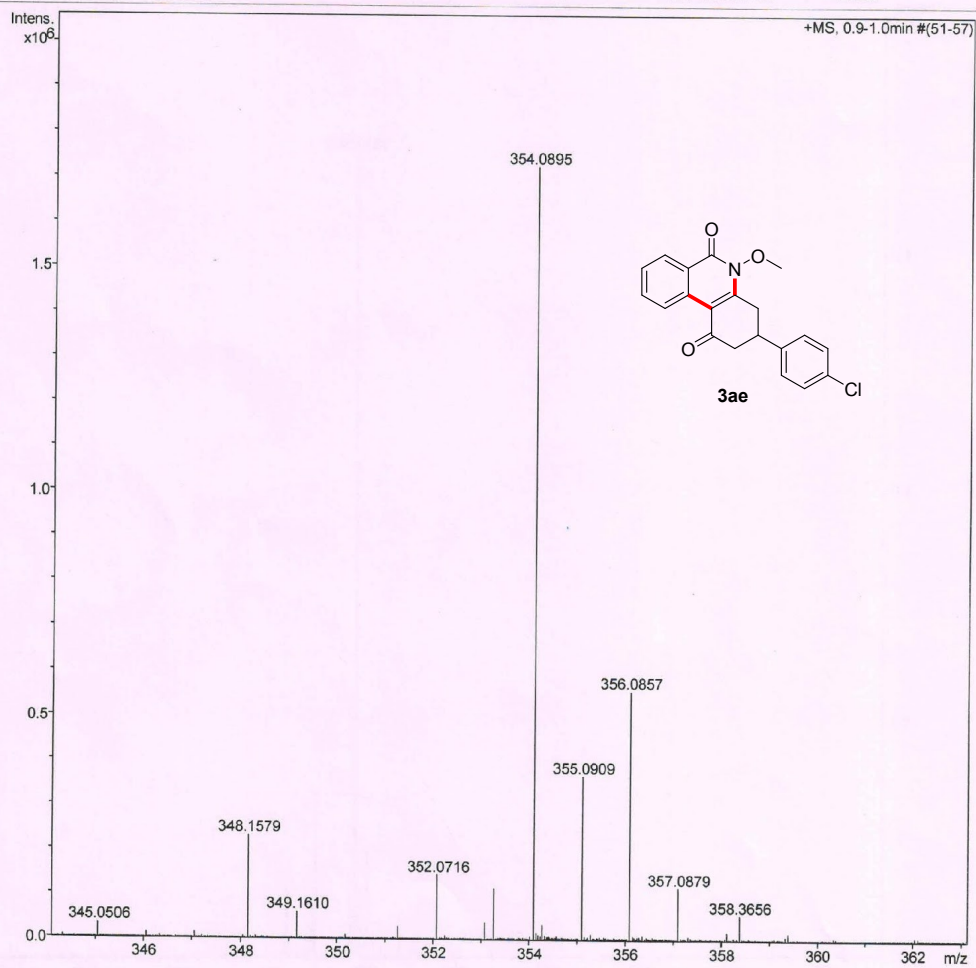

HRMS spectrum of compound 3ae

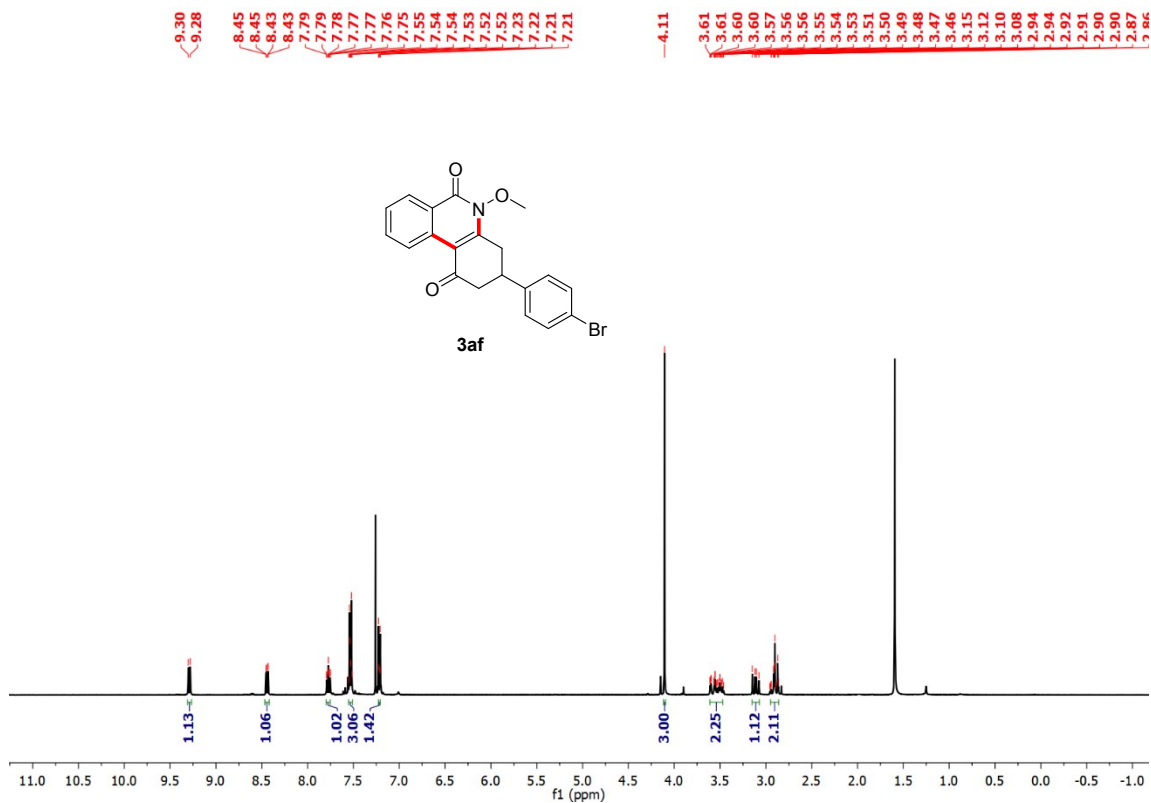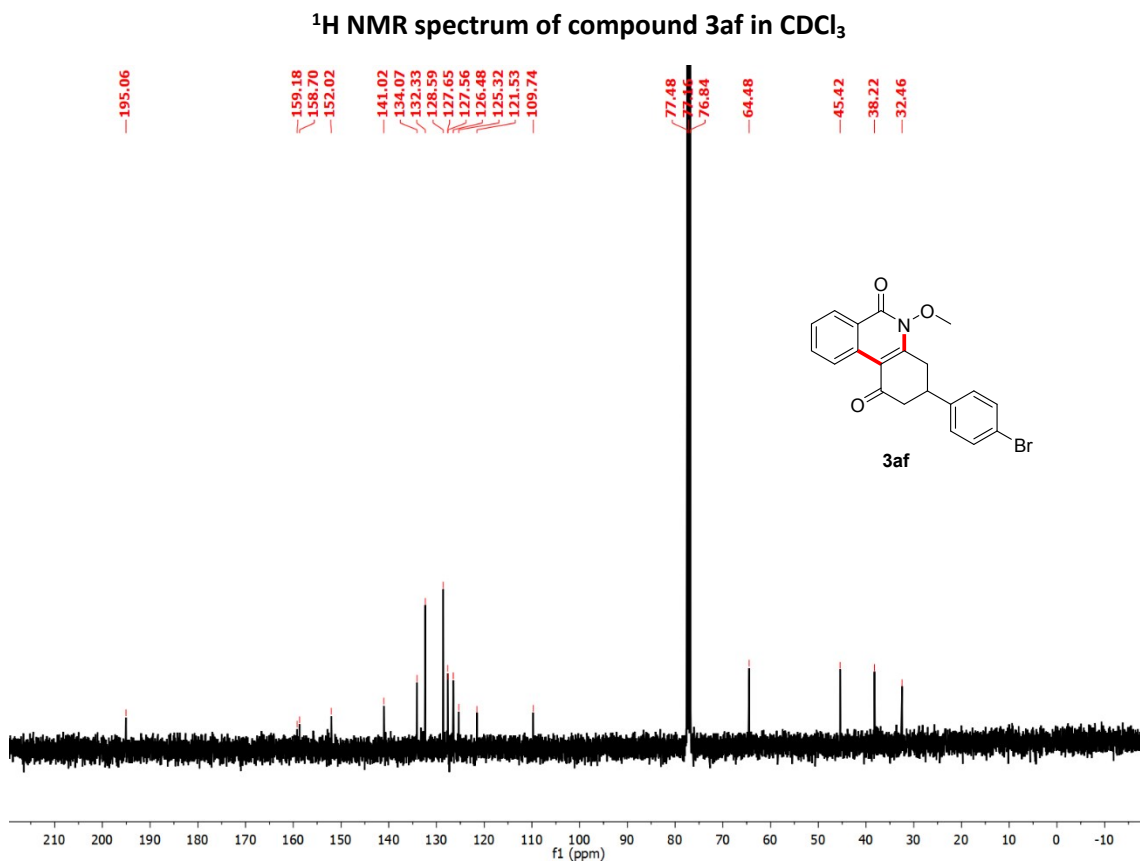

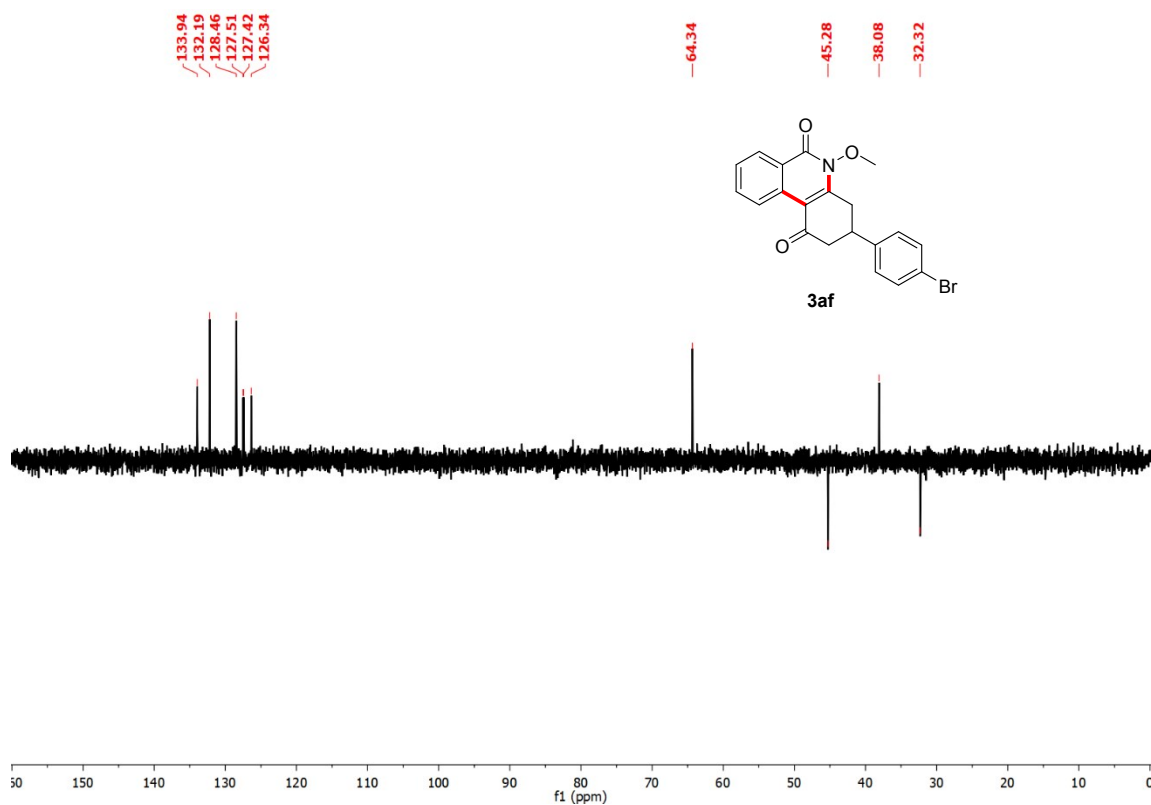

DEPT-135 NMR spectrum of compound 3af in CDCl<sub>3</sub>

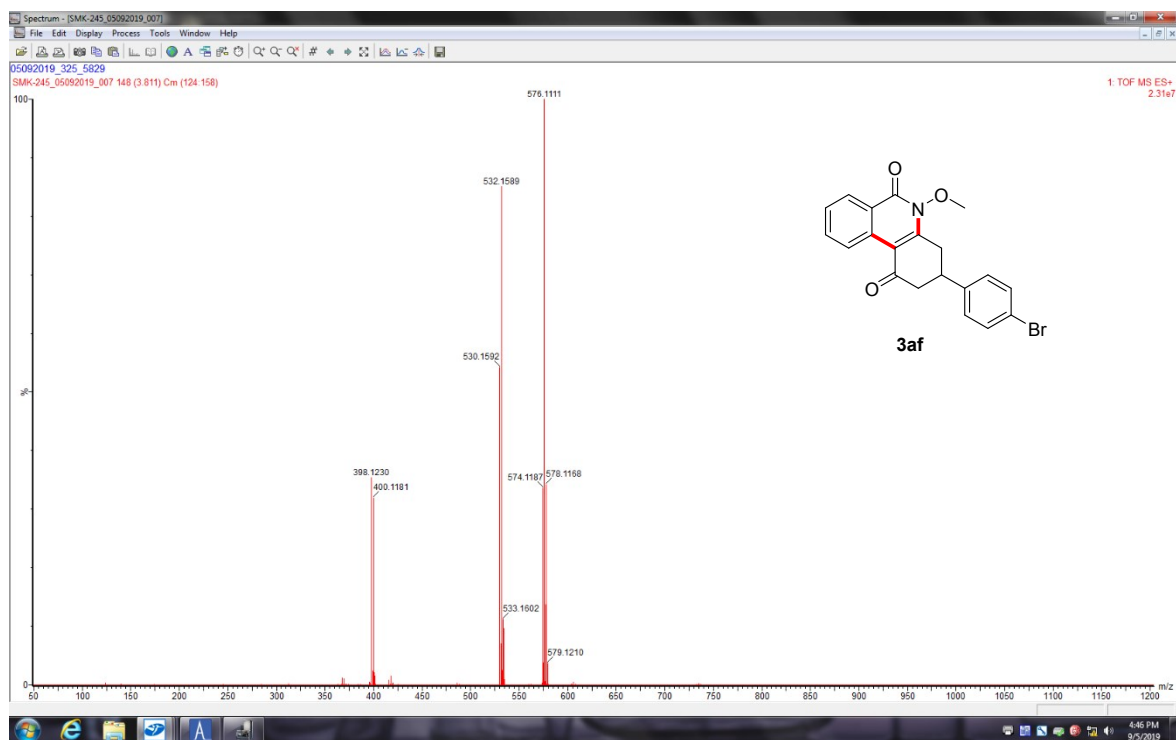

HRMS spectrum of compound 3af

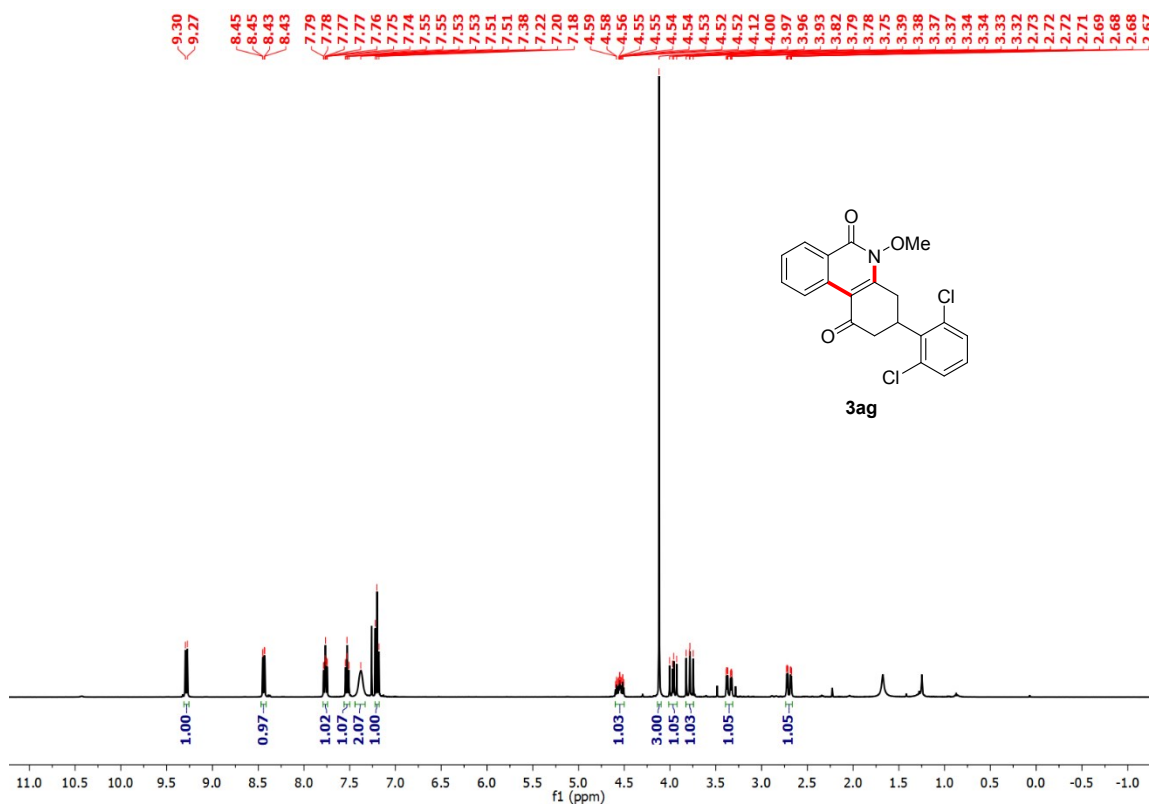

**<sup>1</sup>H NMR spectrum of compound 3ag in CDCl<sub>3</sub>**

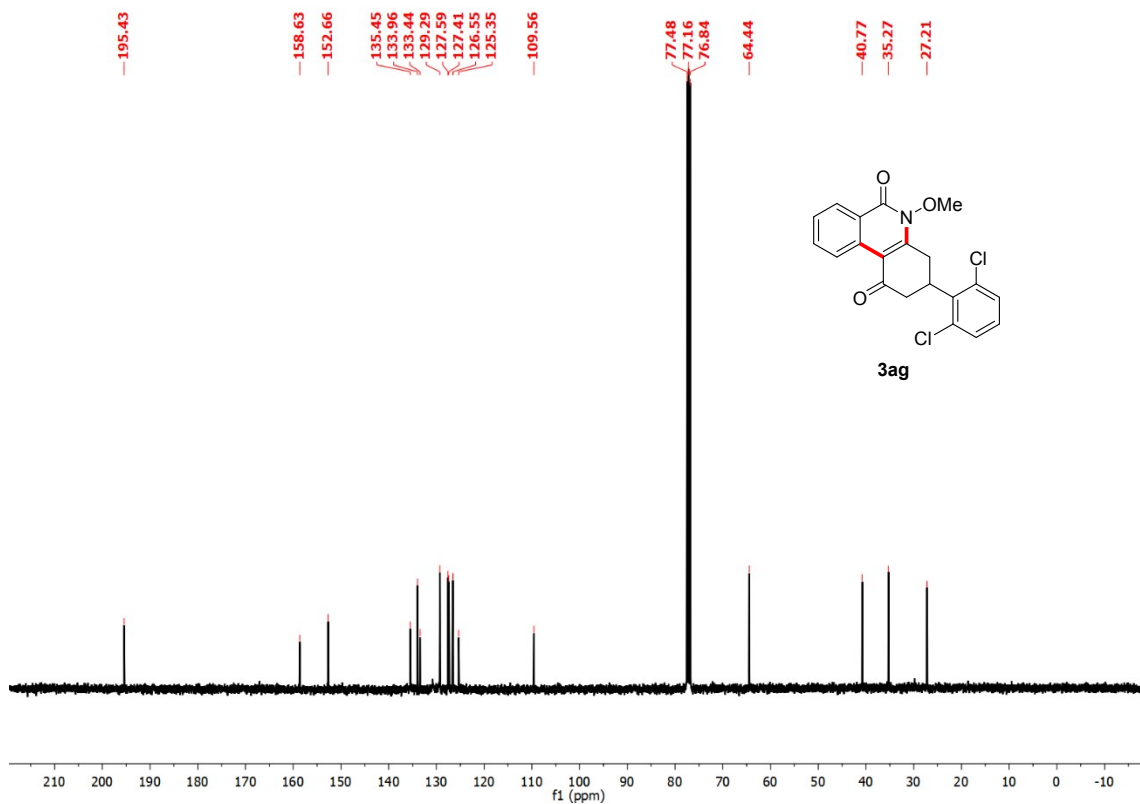

**<sup>13</sup>C NMR spectrum of compound 3ag in CDCl<sub>3</sub>**

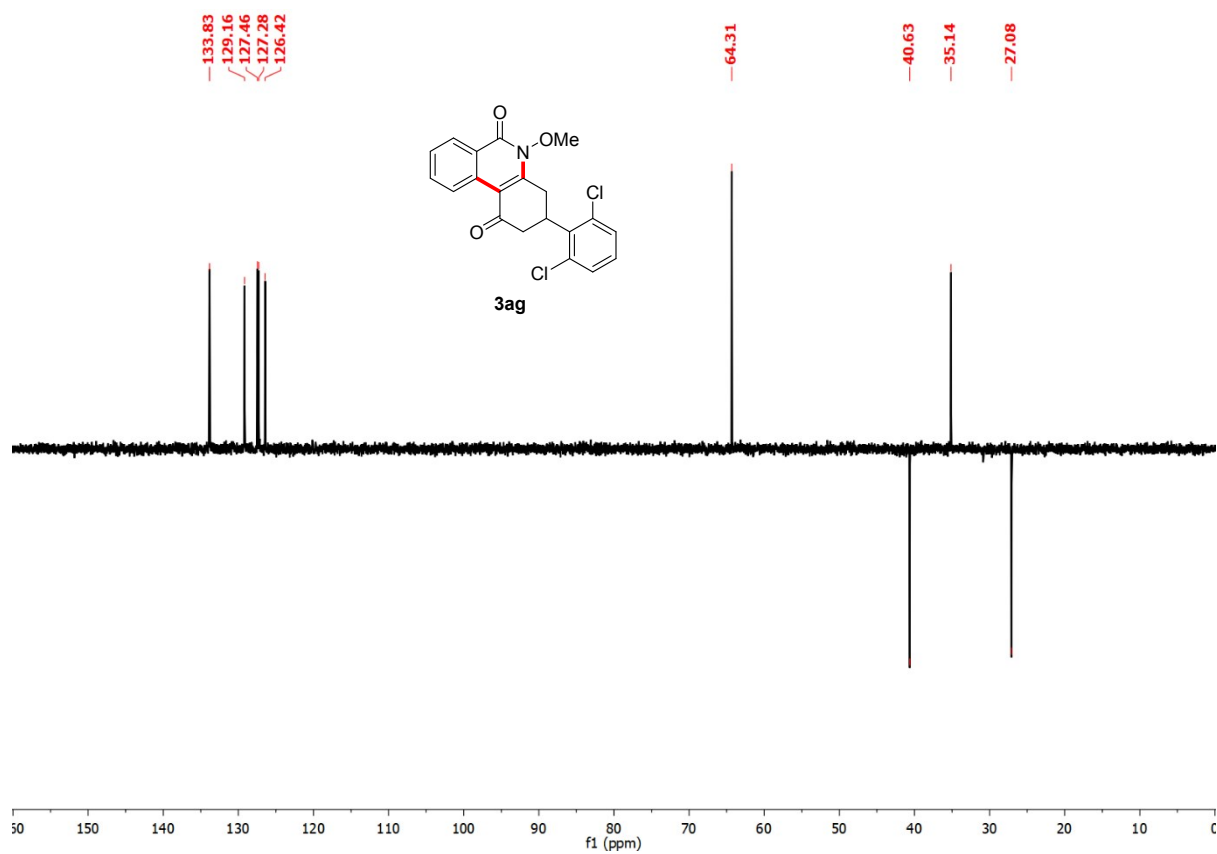

DEPT-135 NMR spectrum of compound 3ag in CDCl<sub>3</sub>

# UOH -SCHOOL OF CHEMISTRY -HRMS

## Analysis Info

Analysis Name D:\Data\2018\PROF RN\DECASB-54R.d  
Method tune\_low\_Pos.m  
Sample Name ASB-54CHCL3-ACN  
Comment

Acquisition Date 12/4/2018 11:55:22 AM

Operator UOH-Chemistry  
Instrument maXis 10138

## Acquisition Parameter

|             |            |                       |           |                  |           |
|-------------|------------|-----------------------|-----------|------------------|-----------|
| Source Type | ESI        | Ion Polarity          | Positive  | Set Nebulizer    | 0.3 Bar   |
| Focus       | Not active | Set Capillary         | 4200 V    | Set Dry Heater   | 180 °C    |
| Scan Begin  | 50 m/z     | Set End Plate Offset  | -500 V    | Set Dry Gas      | 6.0 l/min |
| Scan End    | 1500 m/z   | Set Collision Cell RF | 350.0 Vpp | Set Divert Valve | Waste     |

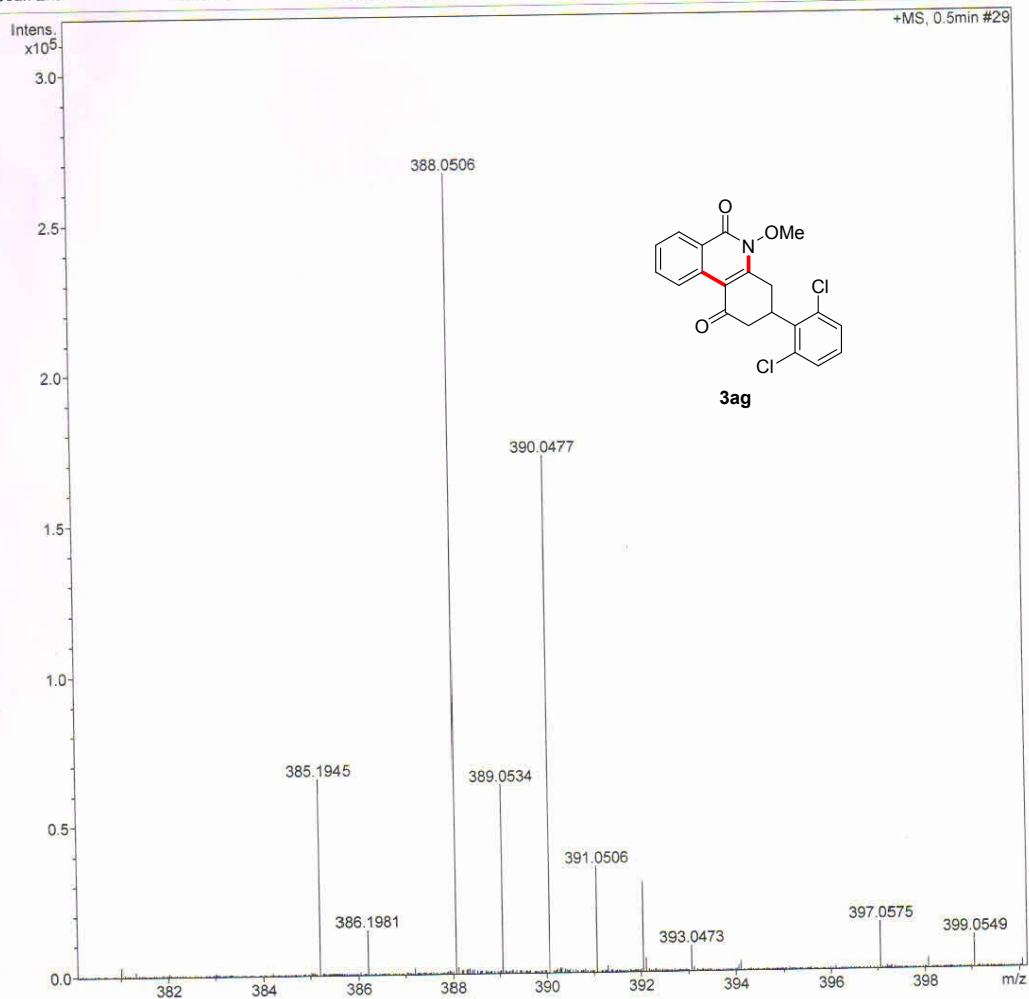

HRMS spectrum of compound 3ag

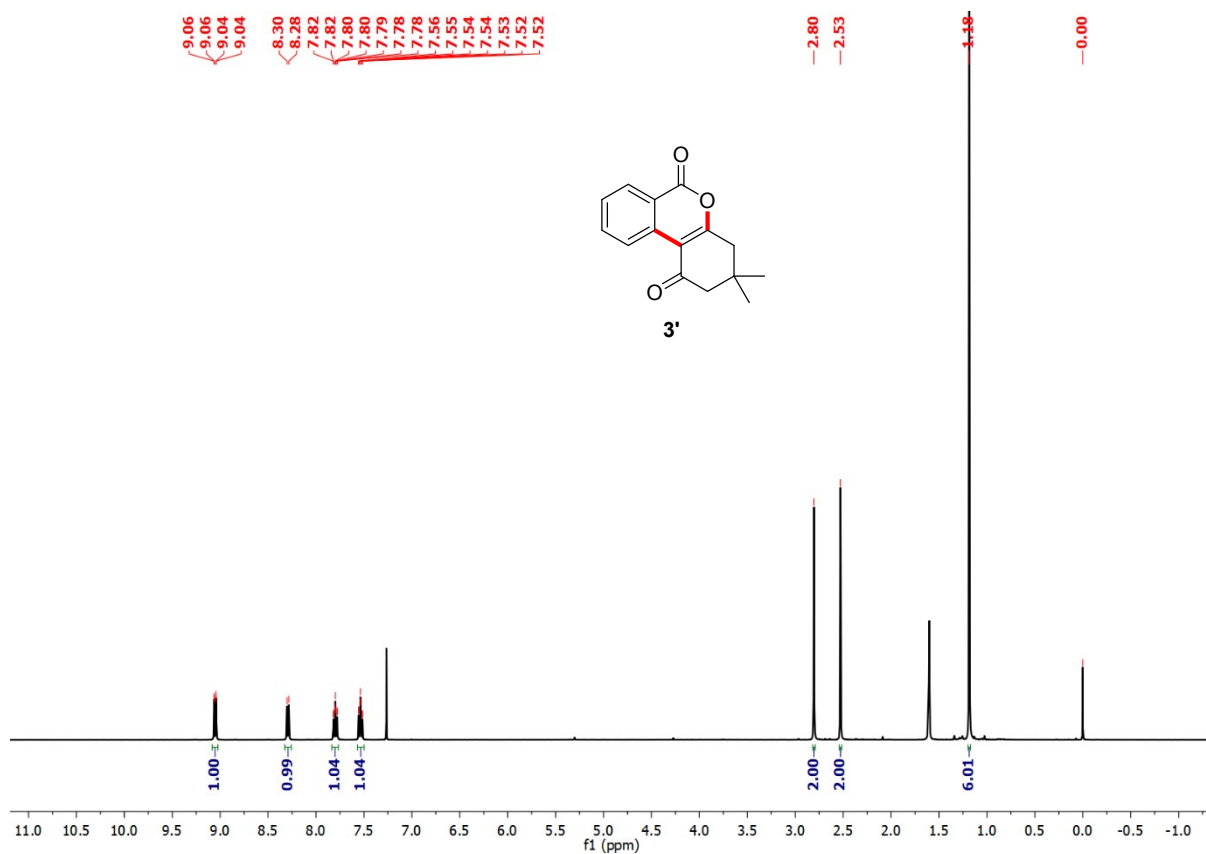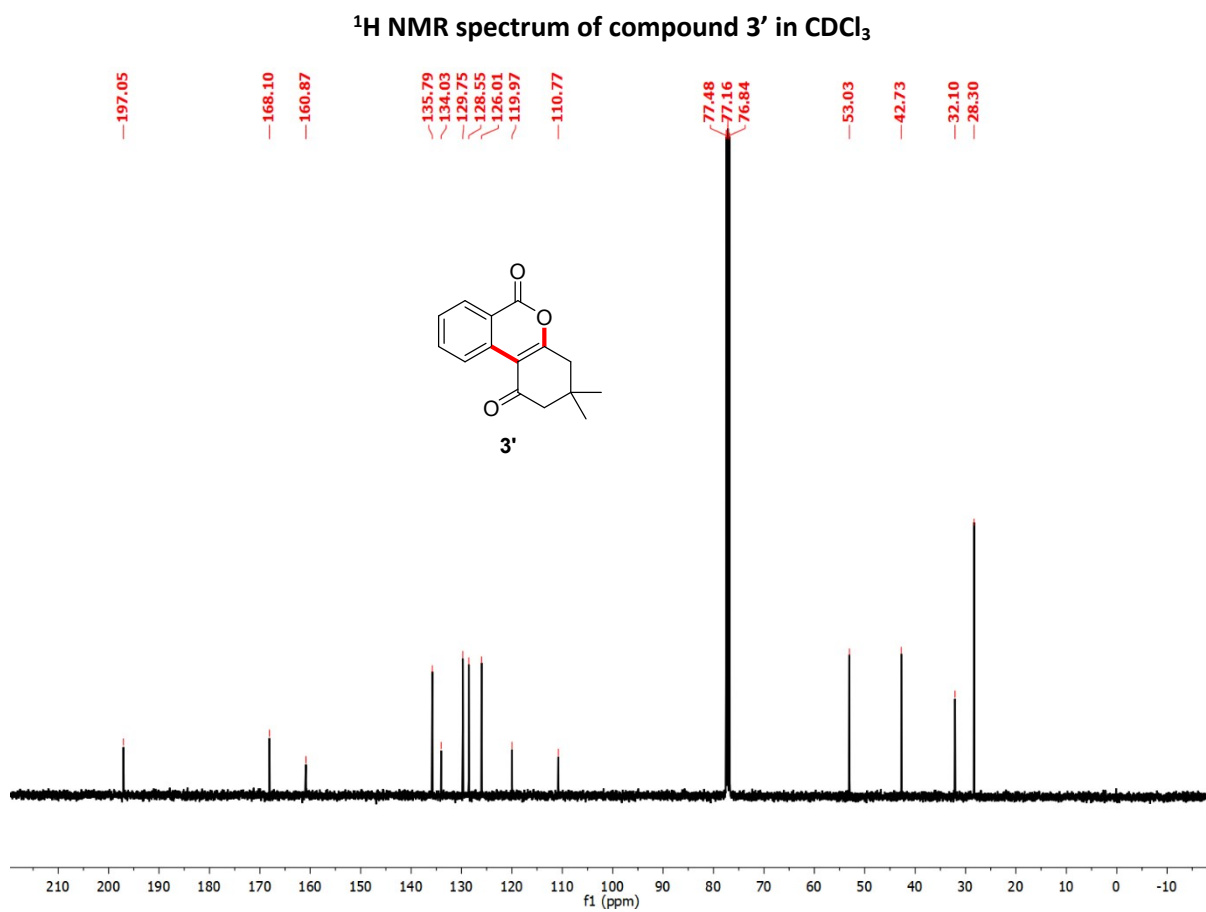



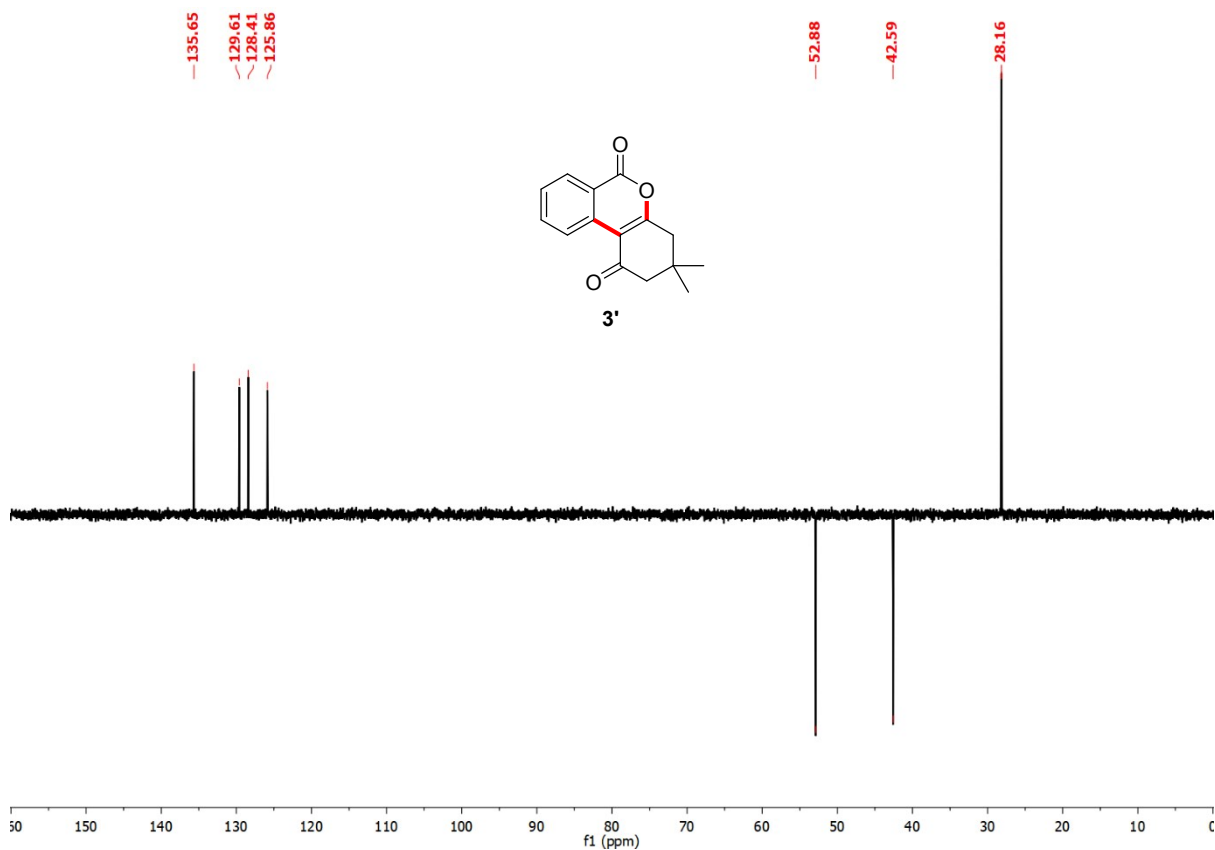

DEPT-135 NMR spectrum of compound 3' in CDCl<sub>3</sub>

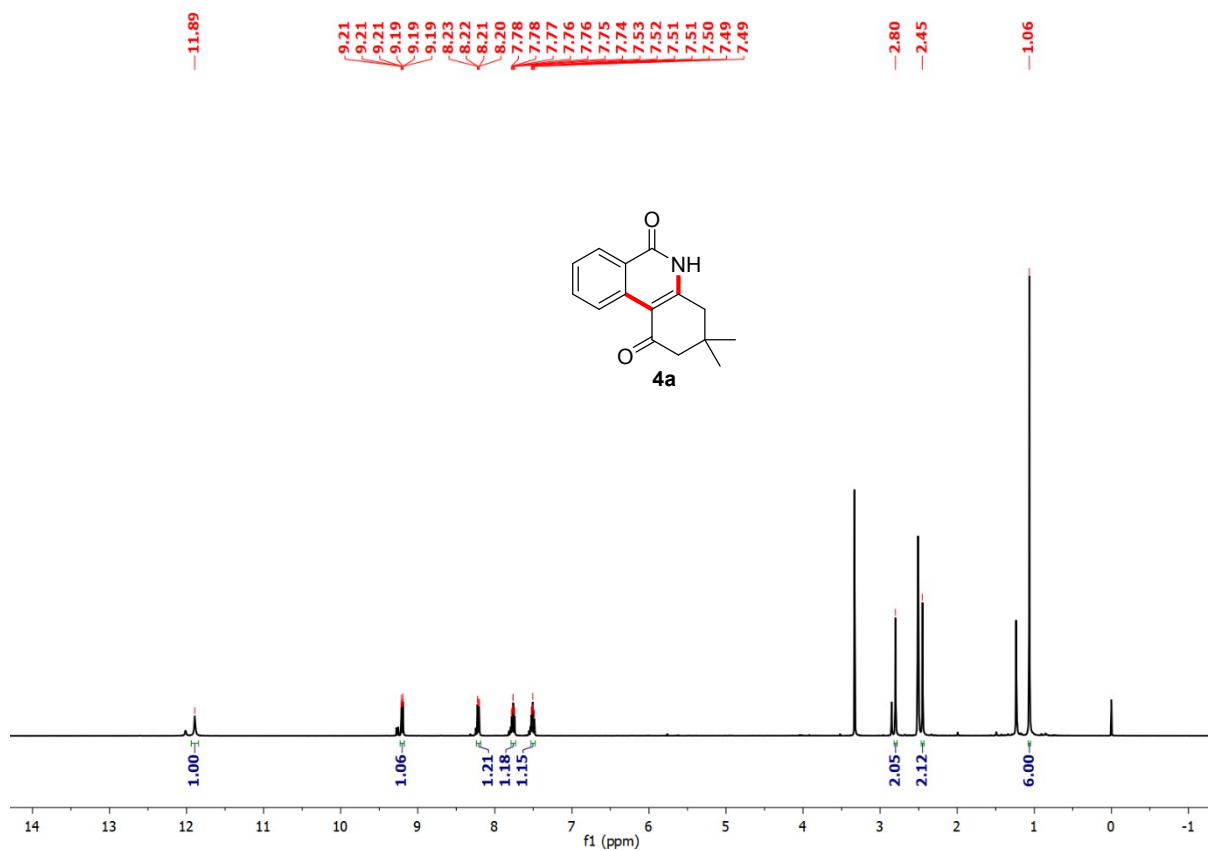

<sup>1</sup>H NMR spectrum of compound 4a in DMSO-d<sub>6</sub>

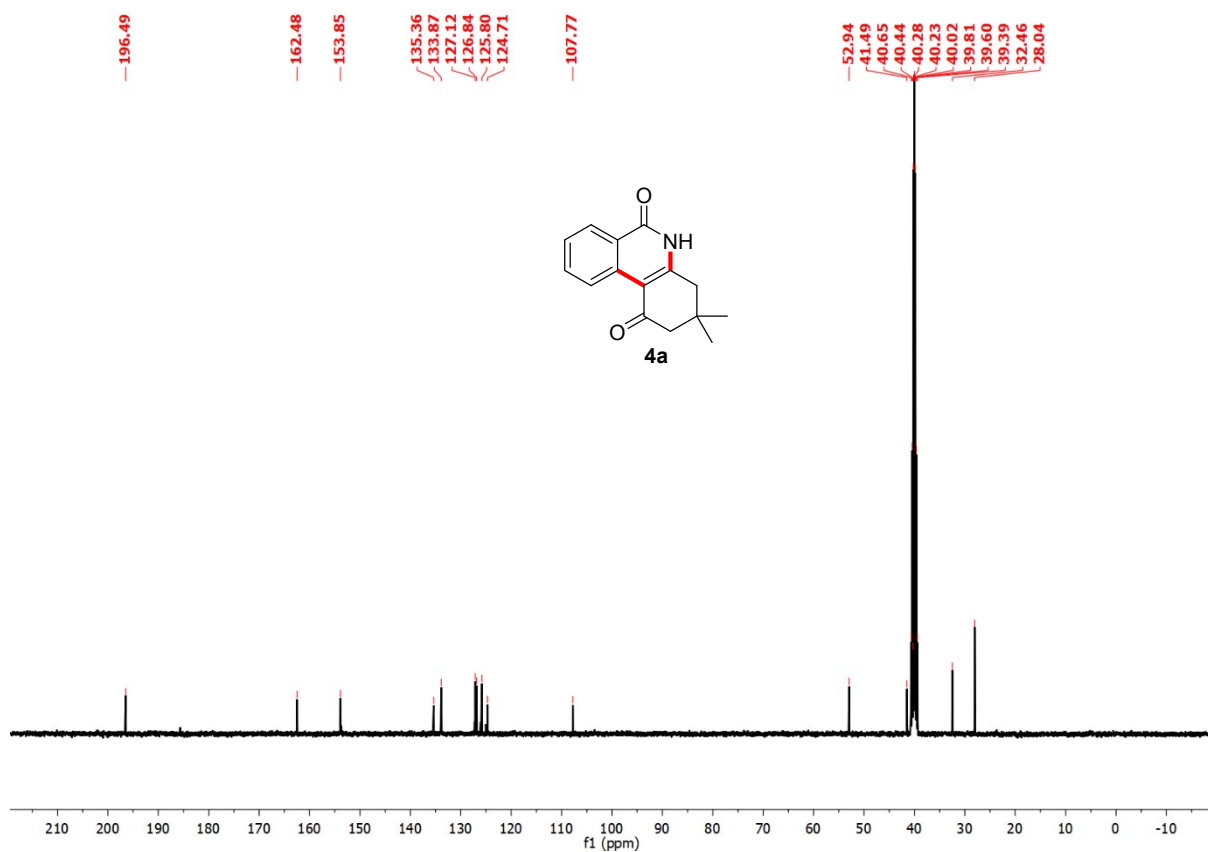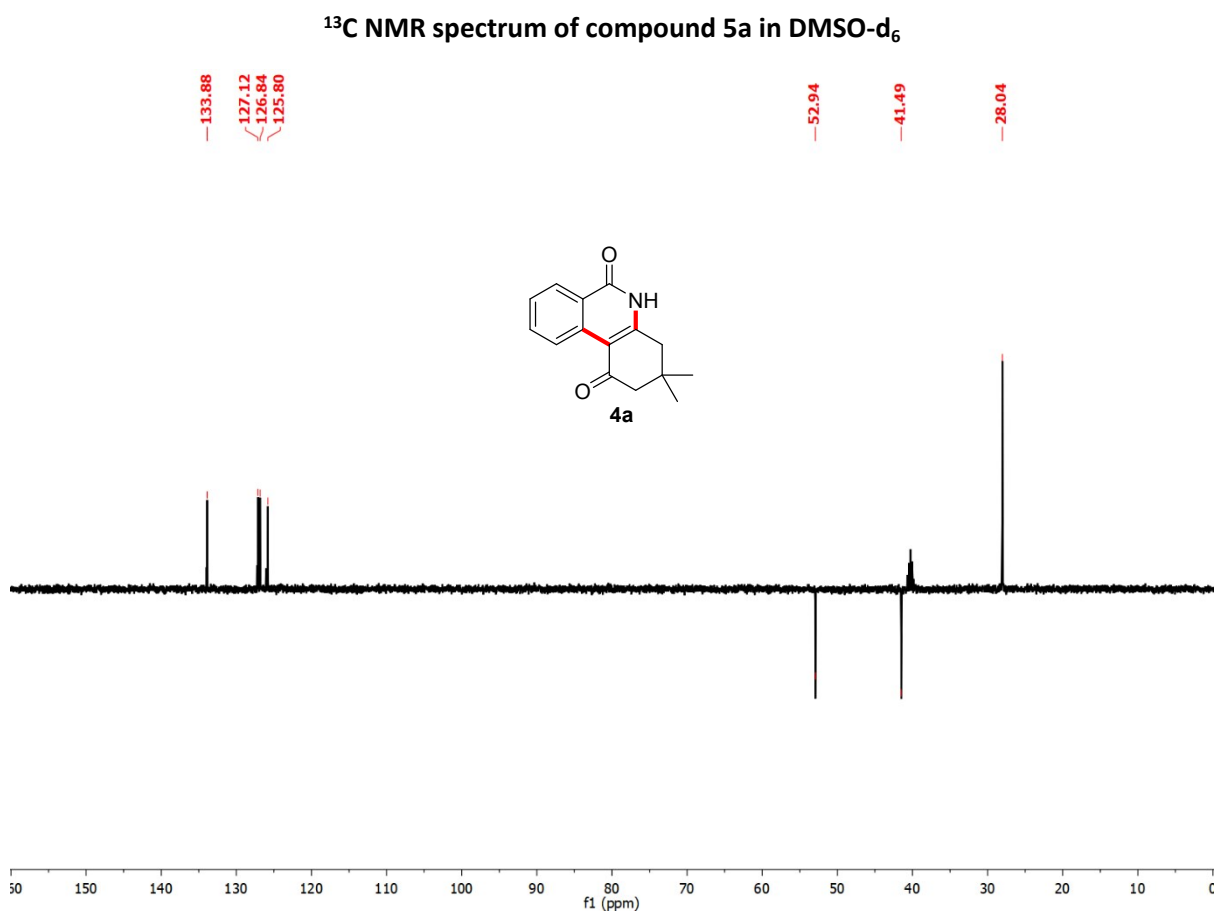

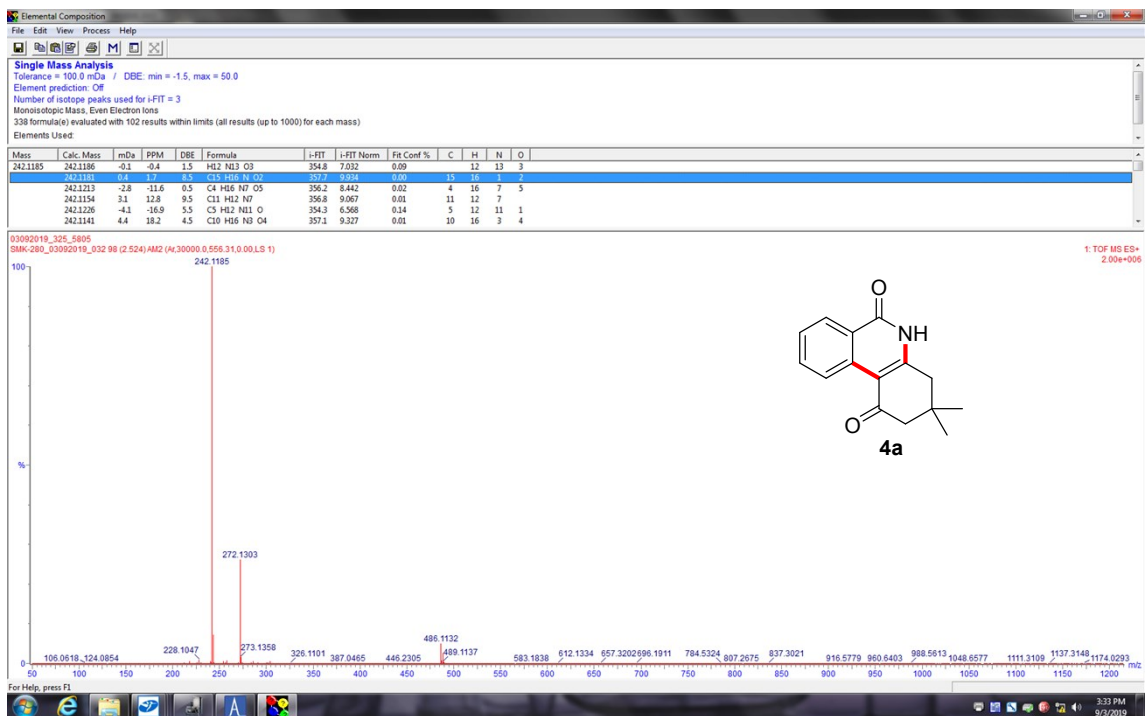

HRMS spectrum of compound 4a

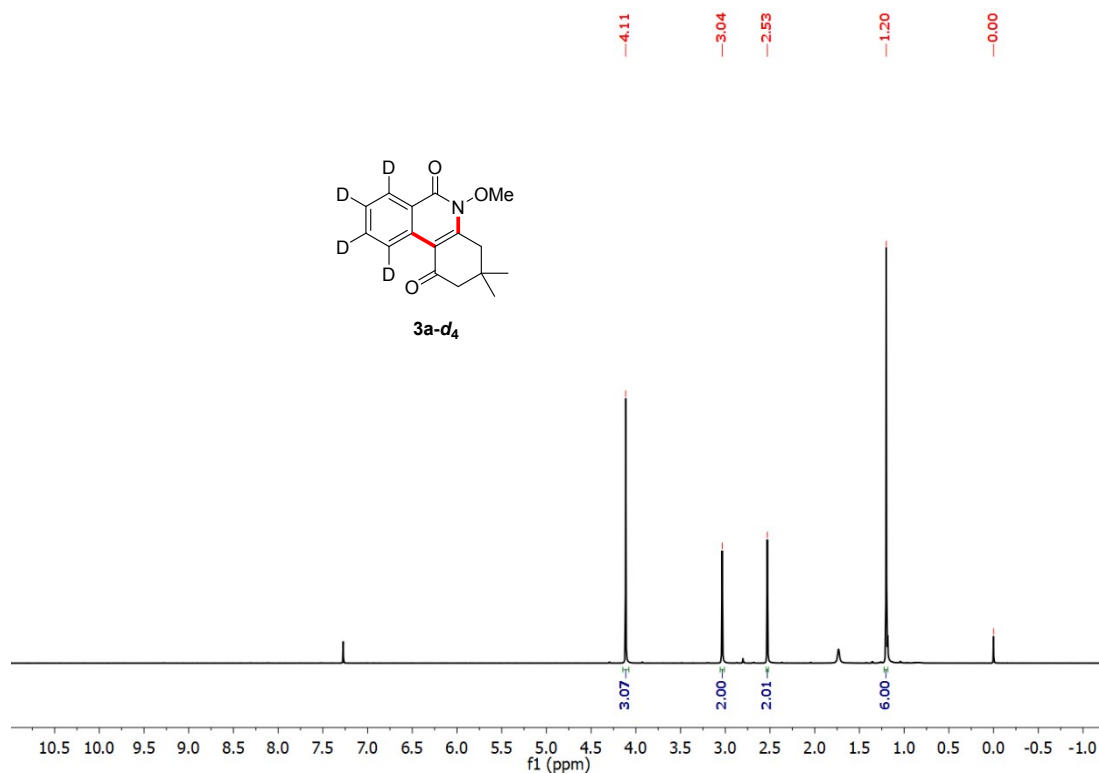

<sup>1</sup>H NMR spectrum of compound 3a-d<sub>4</sub> in CDCl<sub>3</sub>

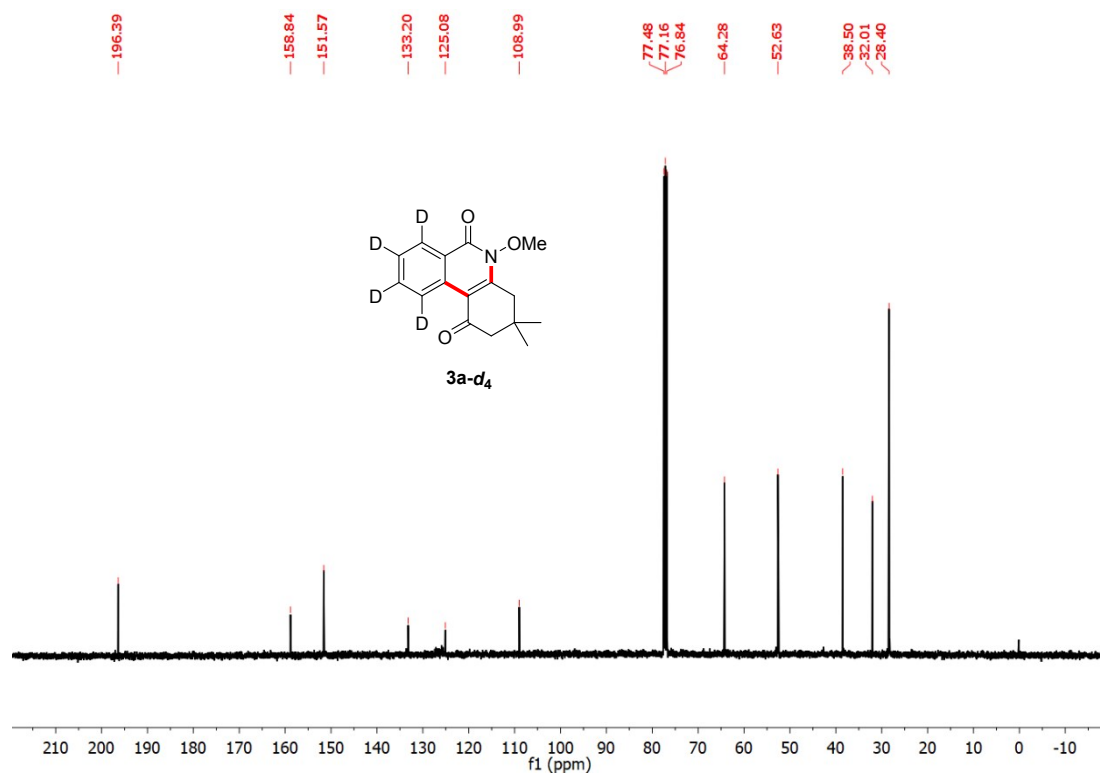

<sup>13</sup>C NMR spectrum of compound **3a-d<sub>4</sub>** in DMSO-d<sub>6</sub>

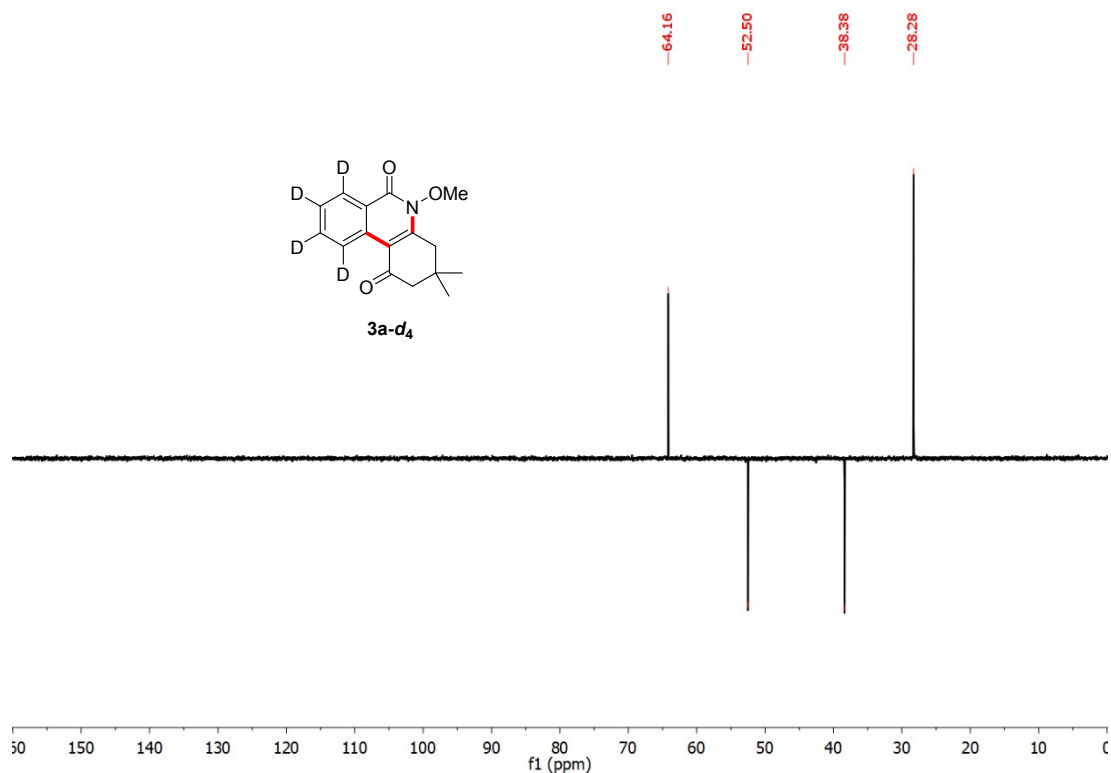

DEPT-135 NMR spectrum of compound **3a-d<sub>4</sub>** in DMSO-d<sub>6</sub>

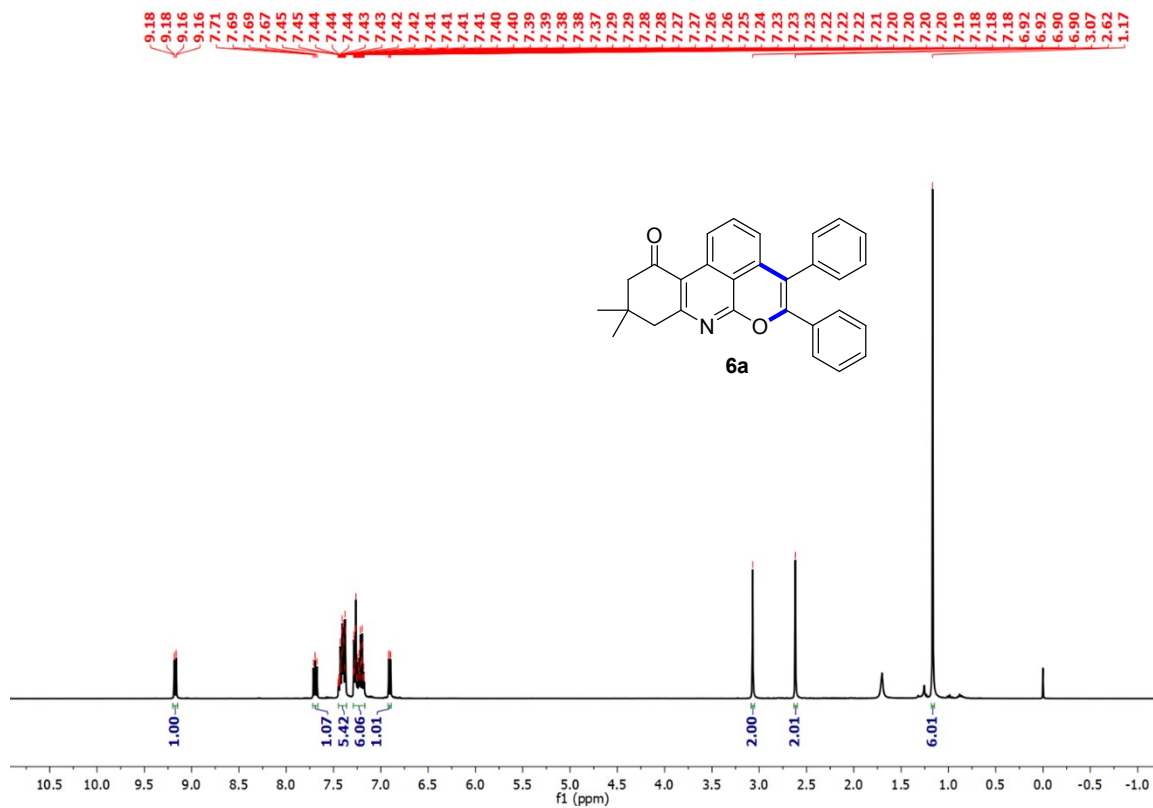

<sup>1</sup>H NMR spectrum of compound 6a in CDCl<sub>3</sub>

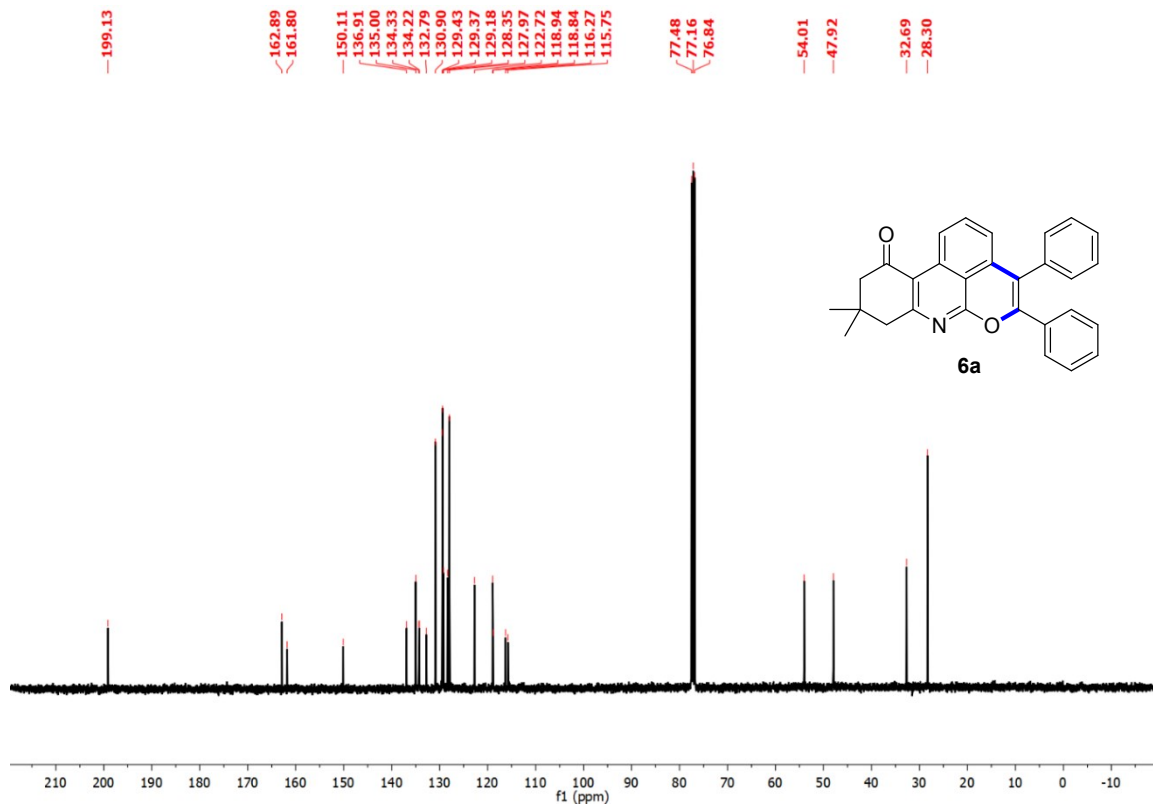

<sup>13</sup>C NMR spectrum of compound 6a in CDCl<sub>3</sub>

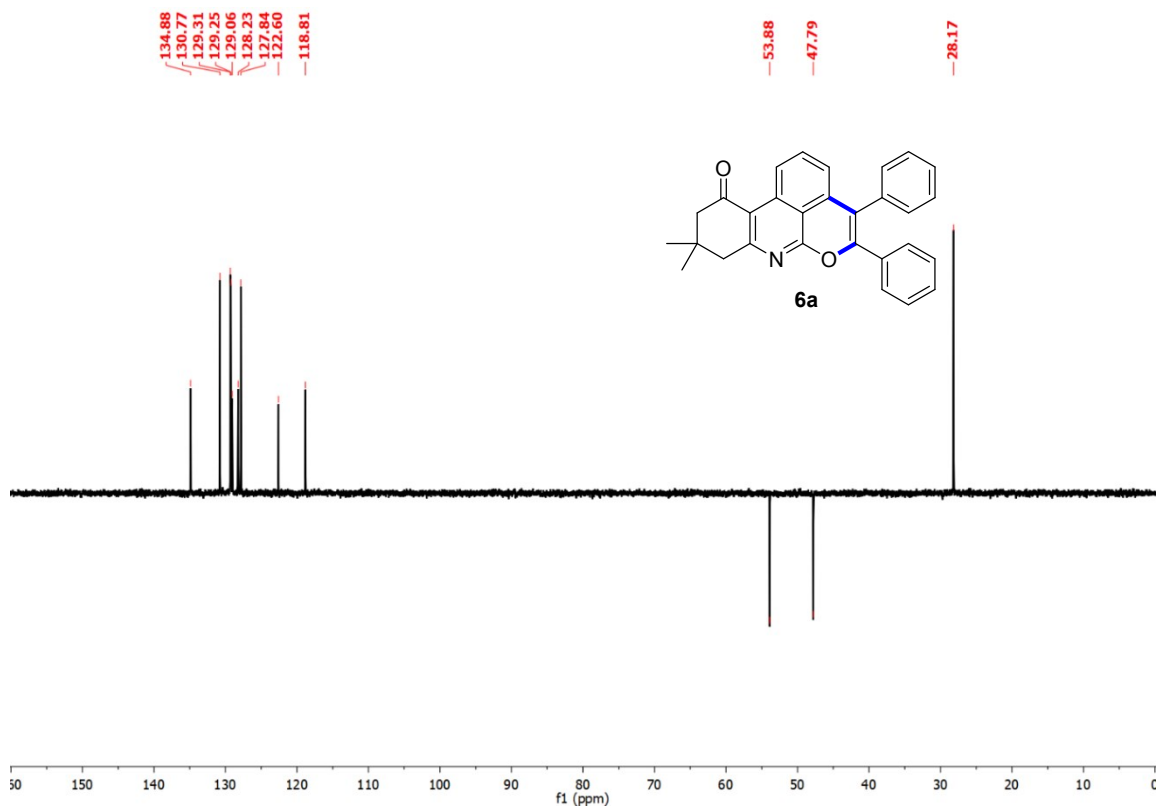

DEPT-135 NMR spectrum of compound 6a in CDCl<sub>3</sub>

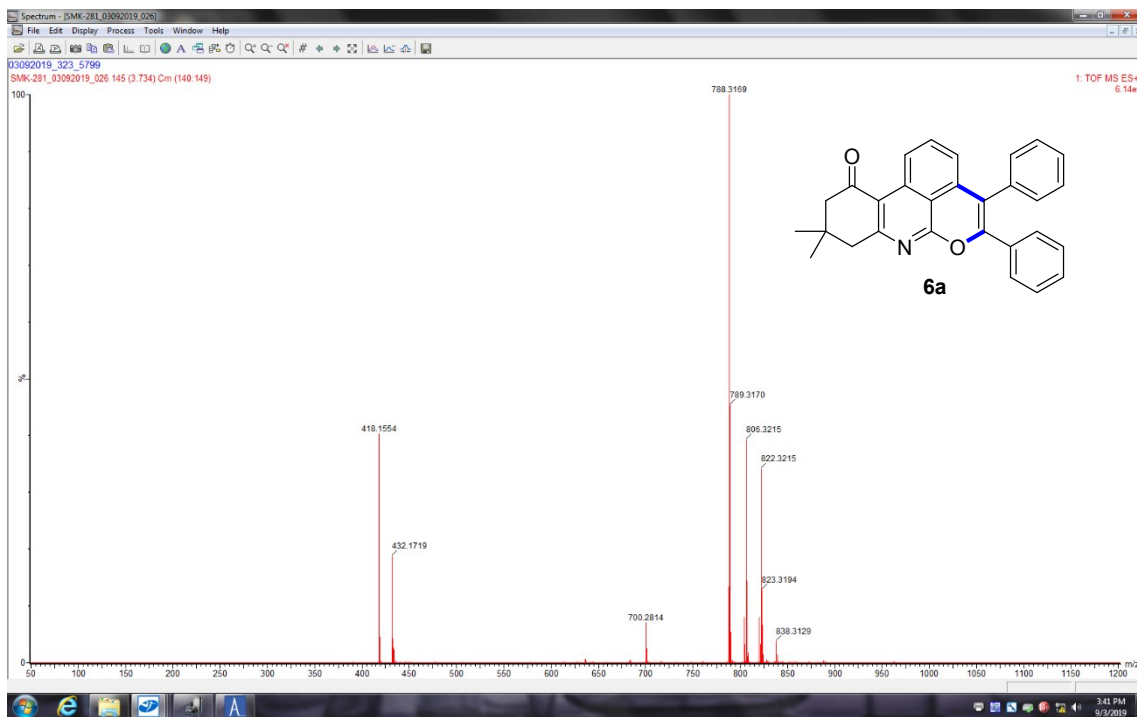

HRMS spectrum of compound 6a

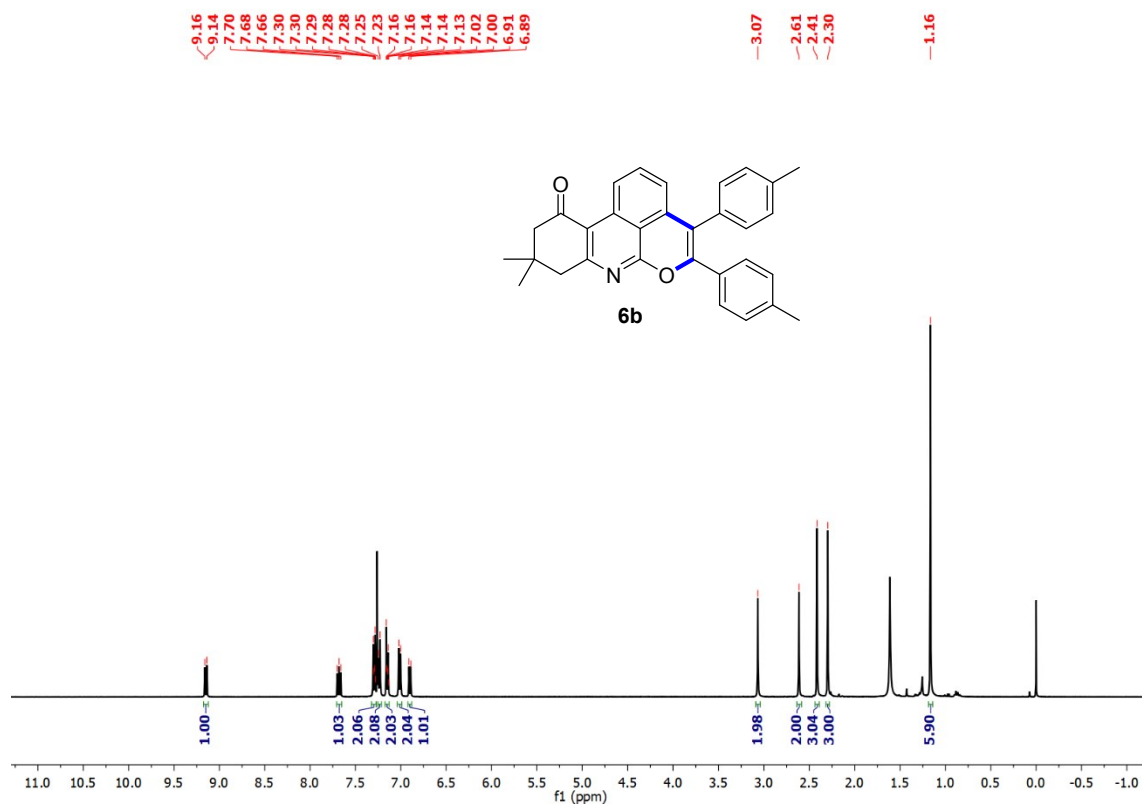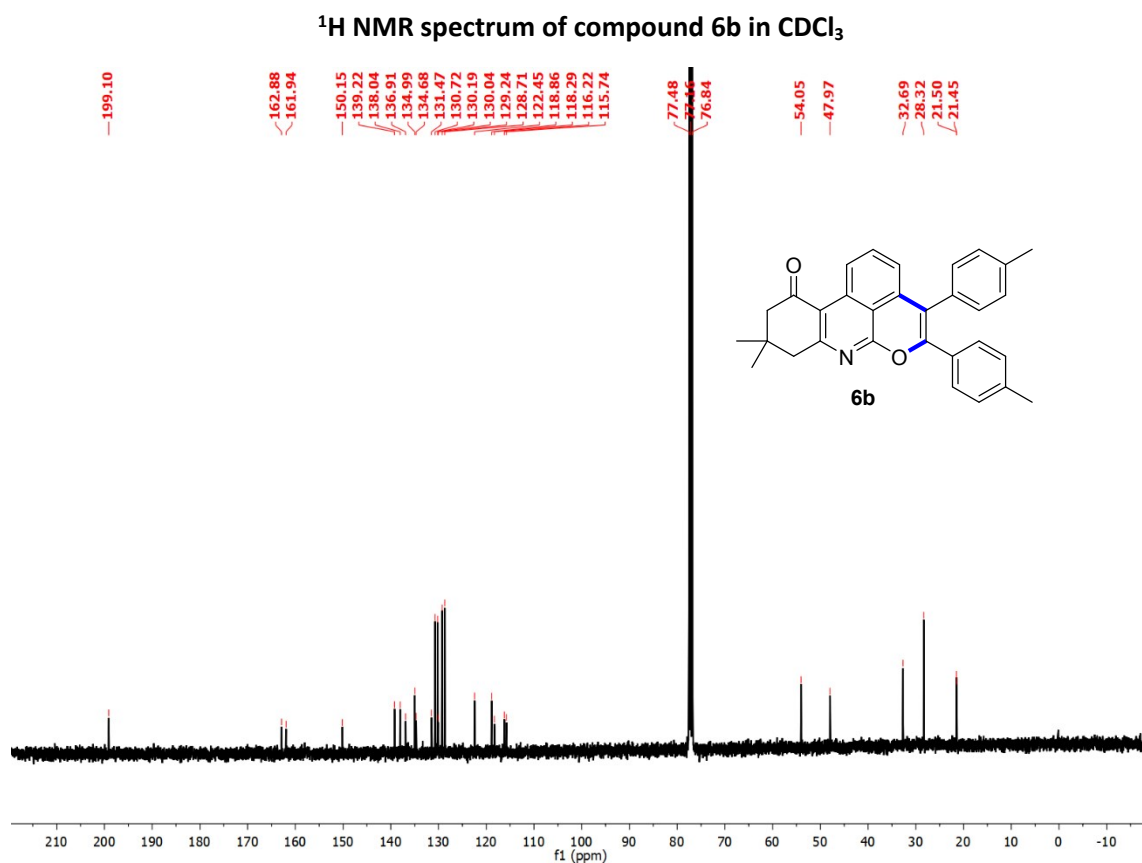

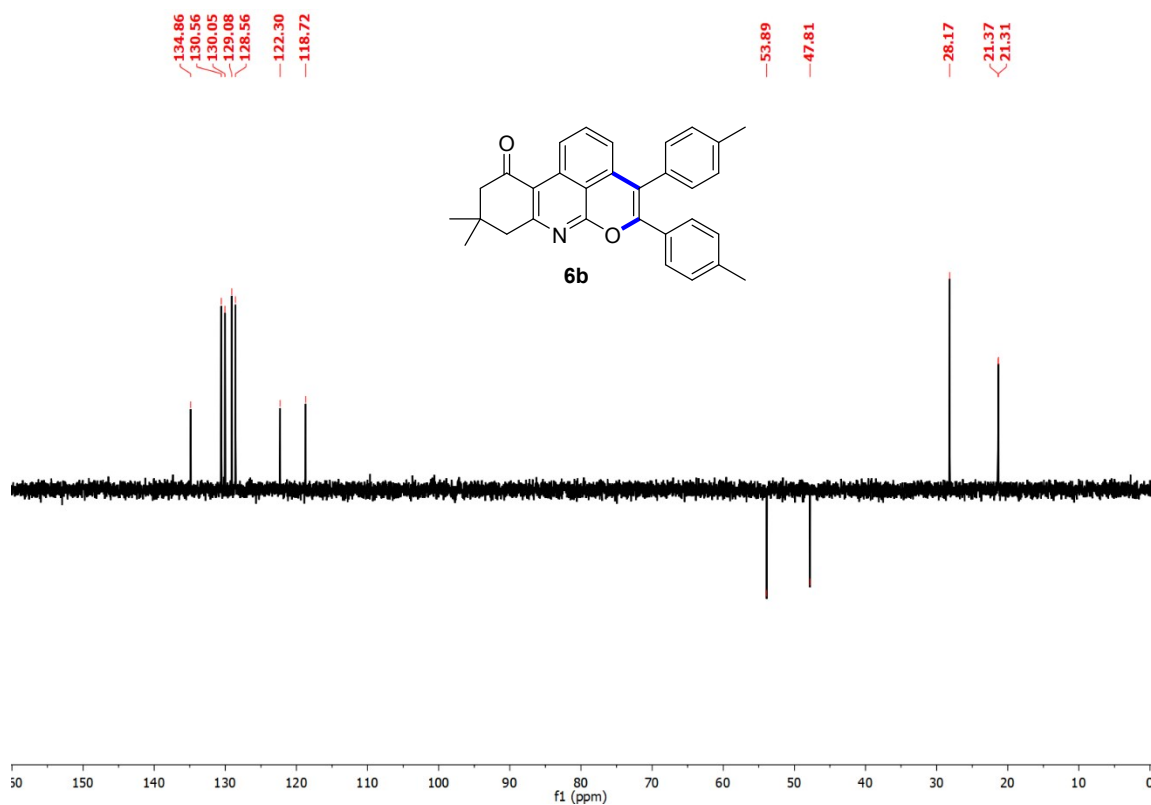

DEPT-135 NMR spectrum of compound 6b in CDCl<sub>3</sub>

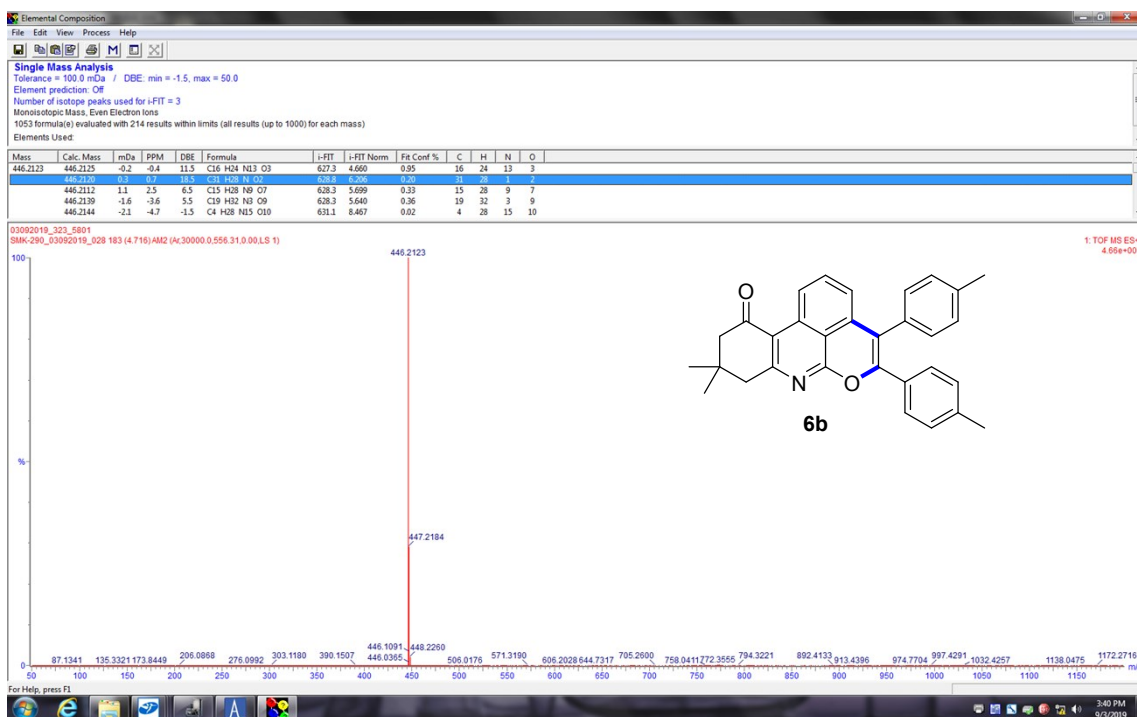

HRMS spectrum of compound 6b



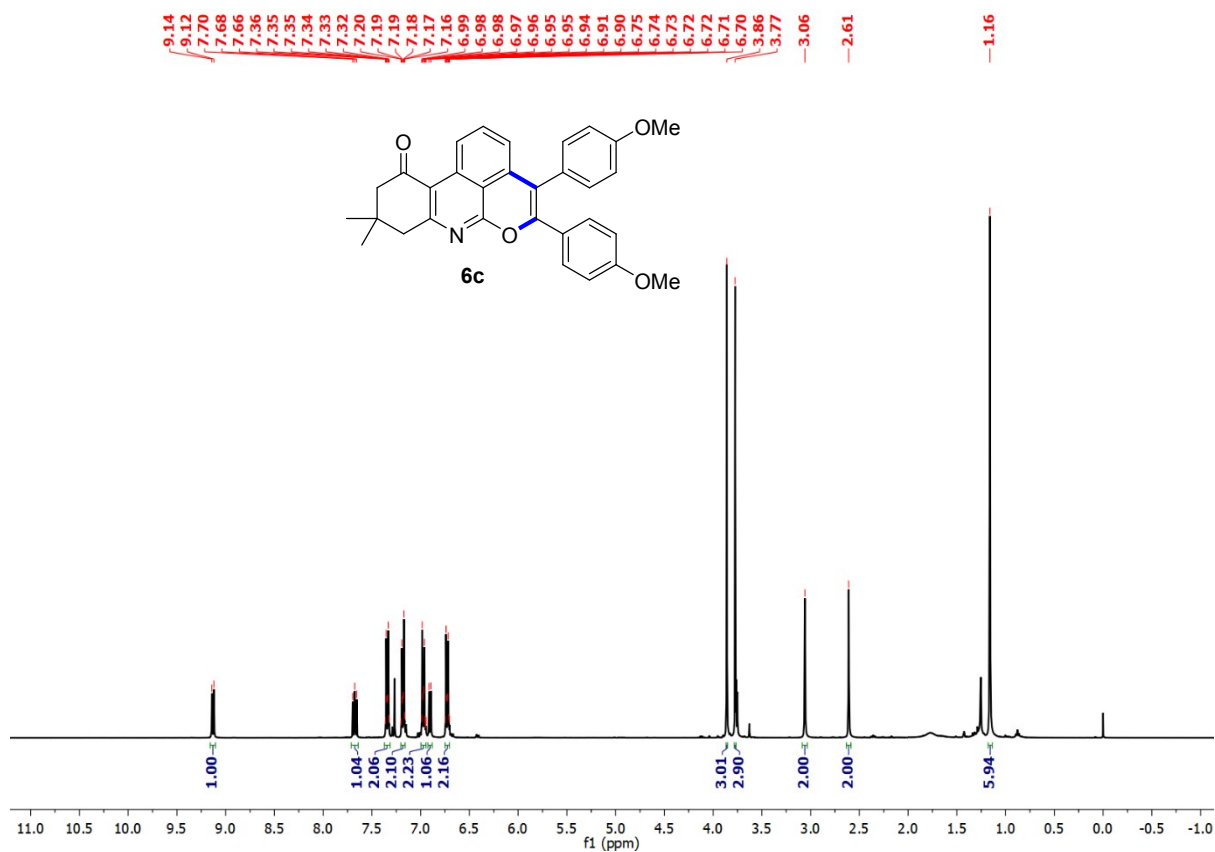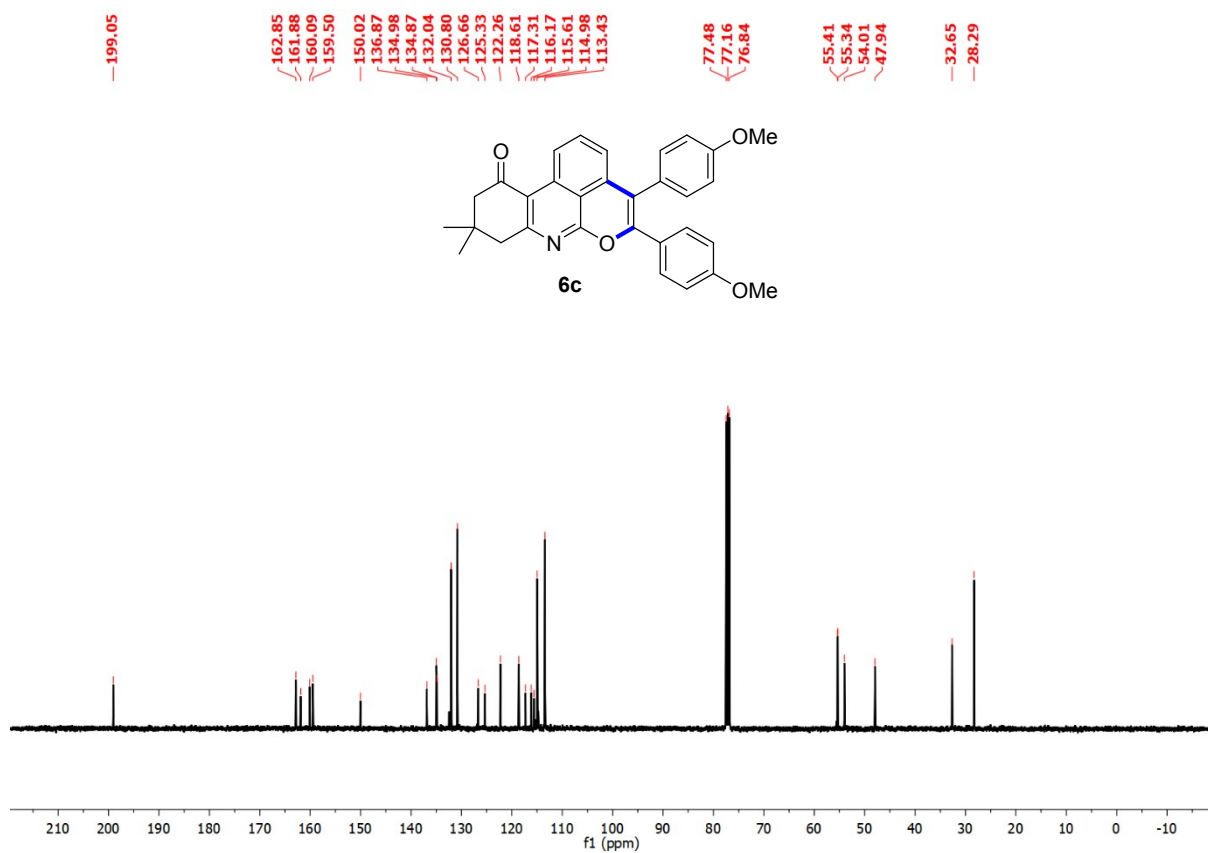

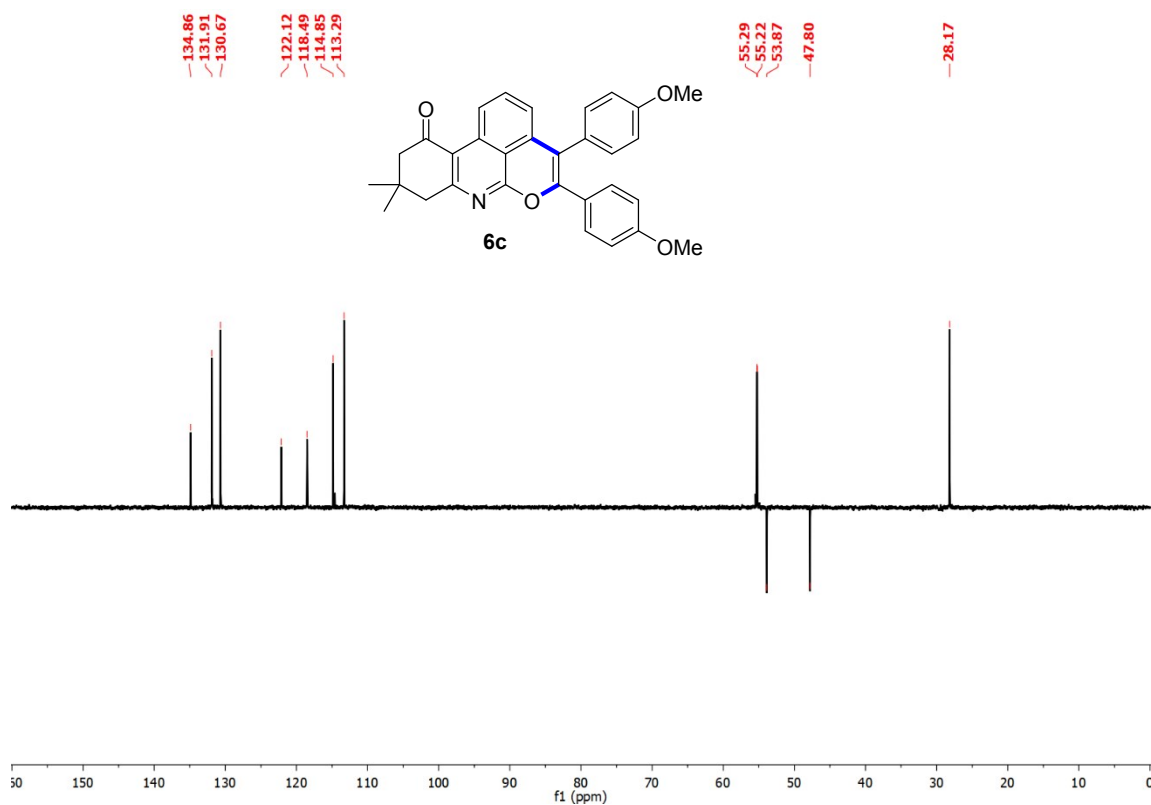

DEPT-135 NMR spectrum of compound 6c in CDCl<sub>3</sub>

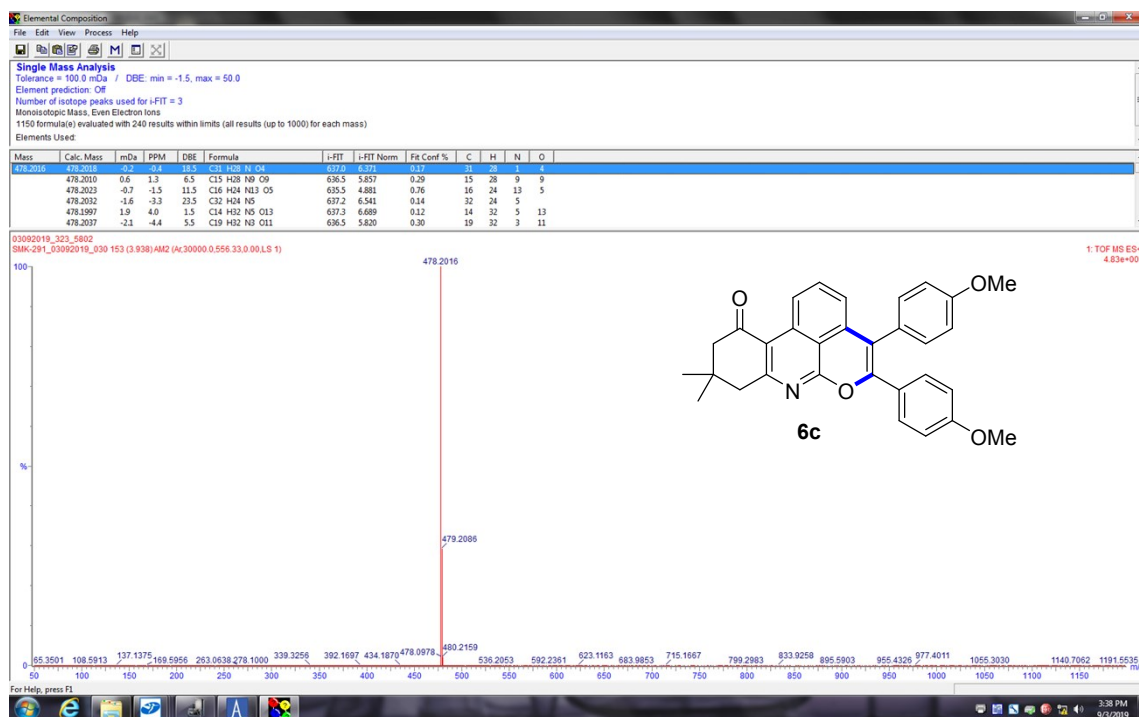

HRMS spectrum of compound 6c

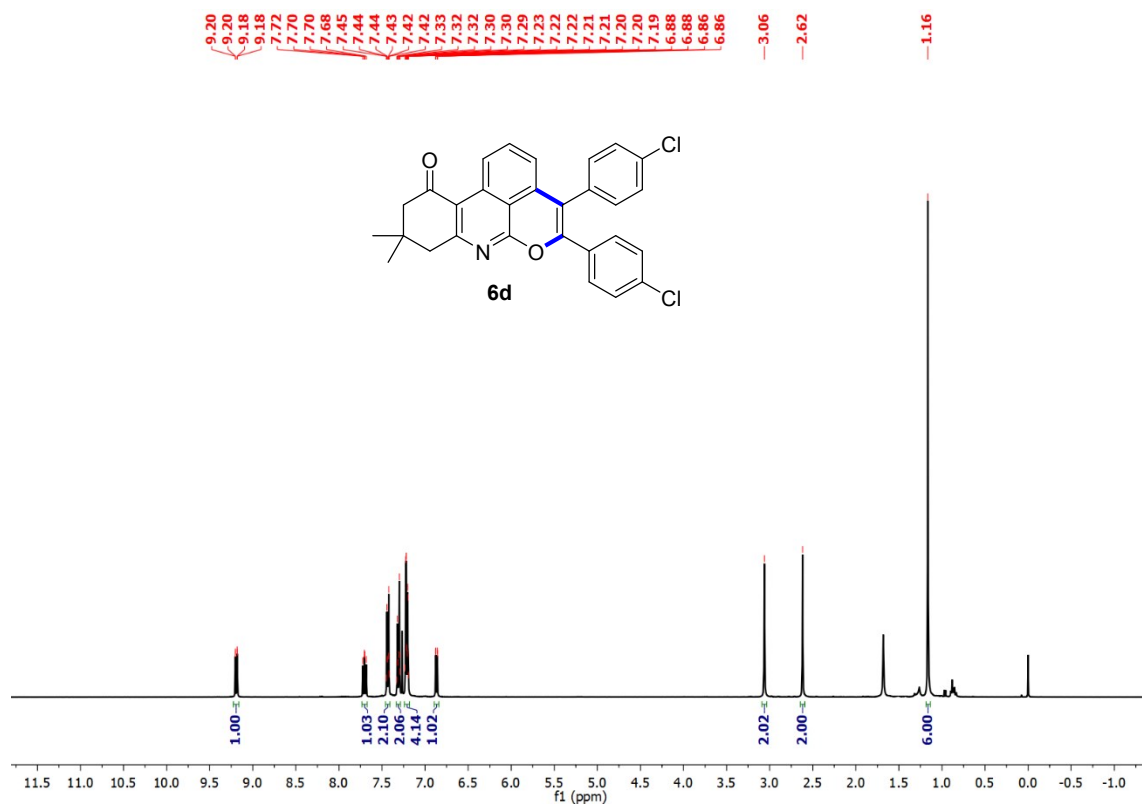

**<sup>1</sup>H NMR spectrum of compound 6d in CDCl<sub>3</sub>**

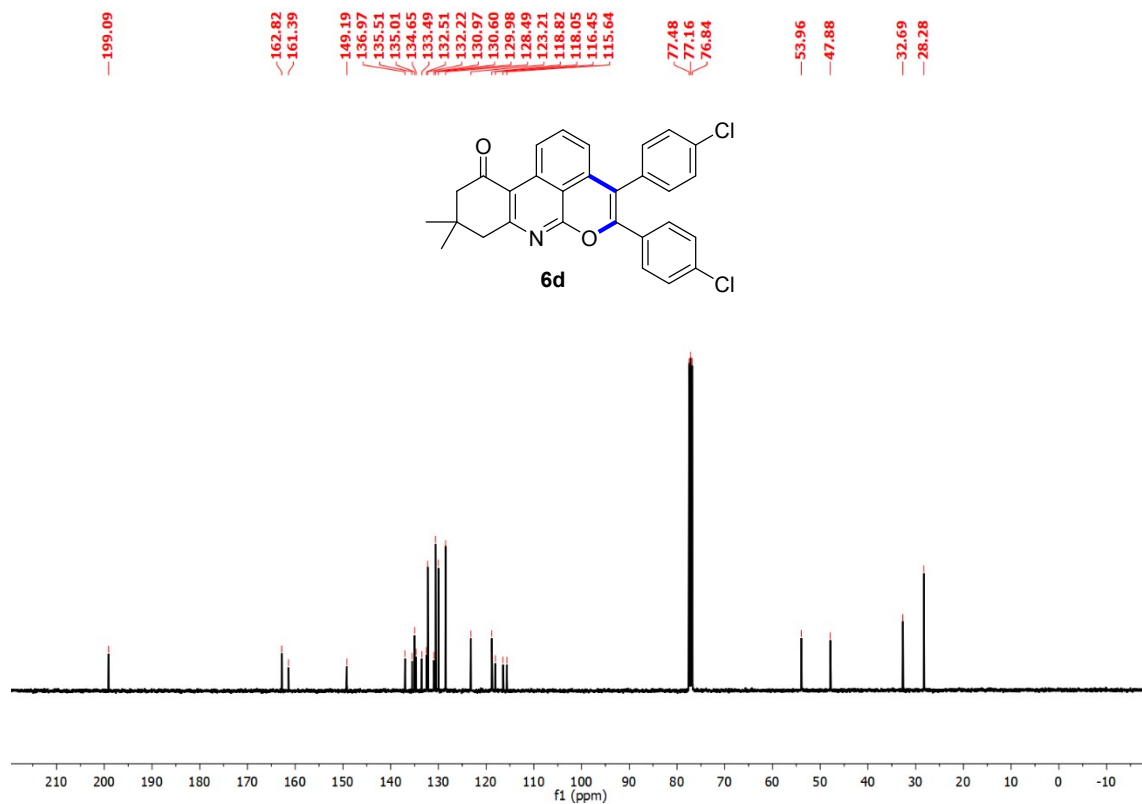

**<sup>13</sup>C NMR spectrum of compound 6d in CDCl<sub>3</sub>**

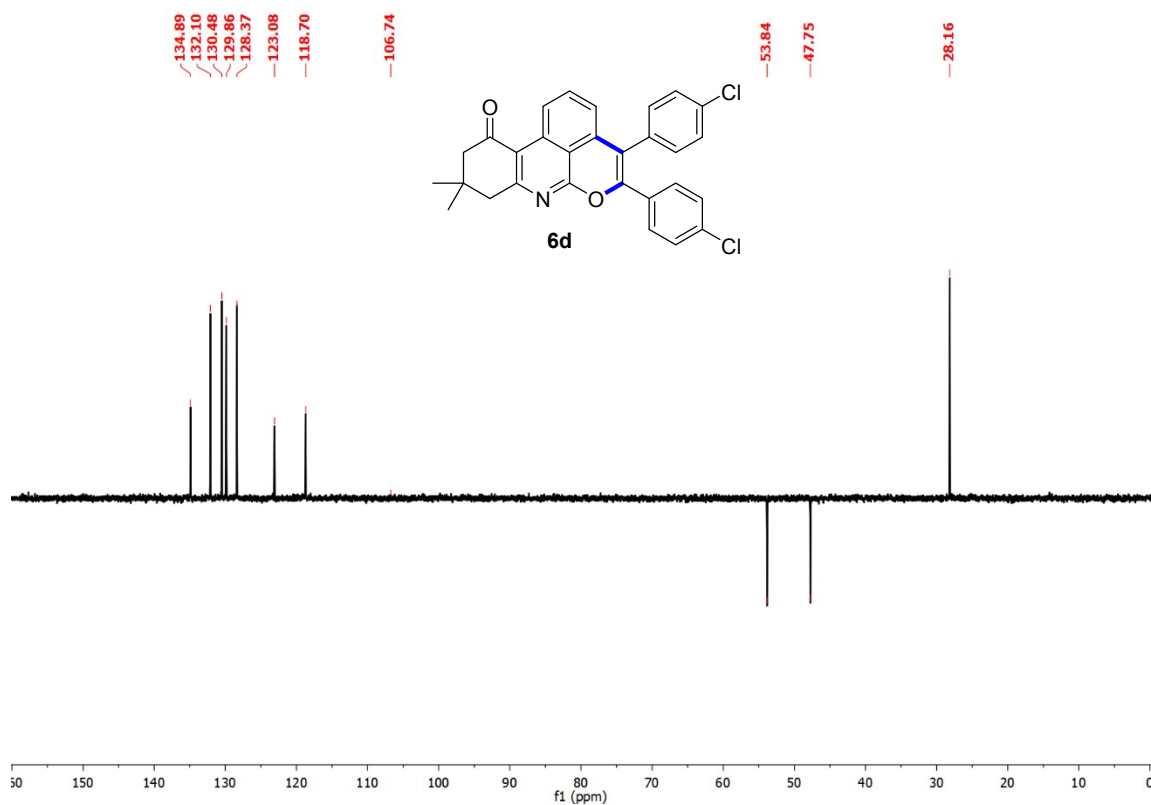

DEPT-135 NMR spectrum of compound 6d in CDCl<sub>3</sub>

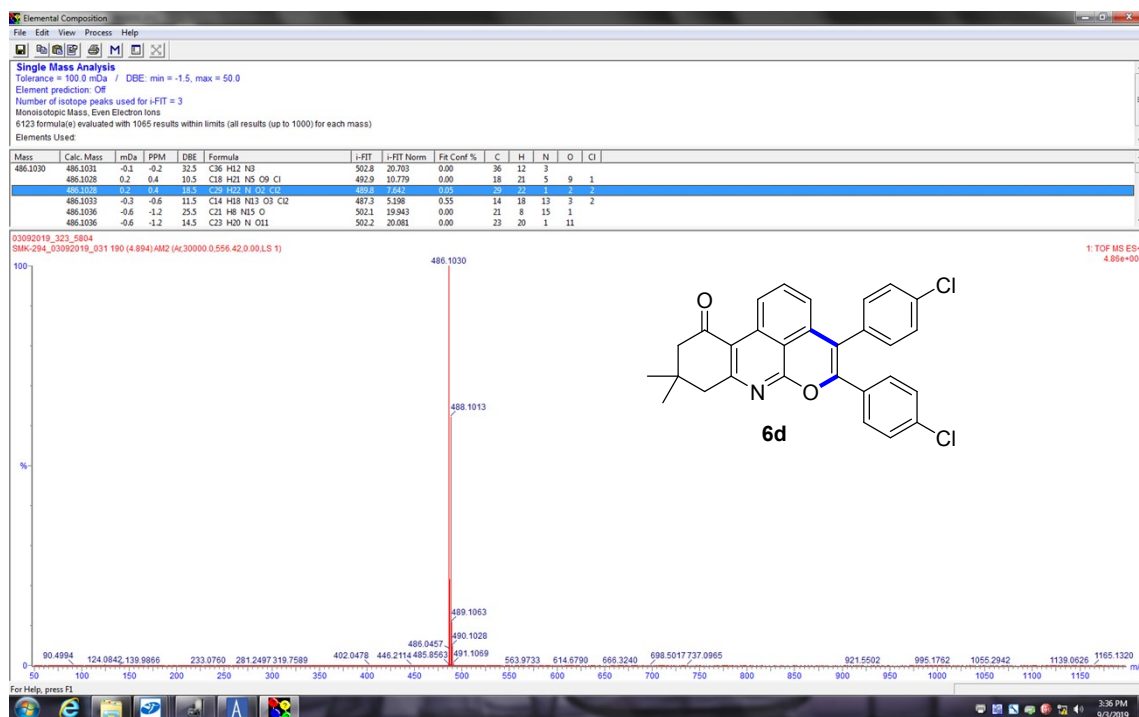

HRMS spectrum of compound 6d

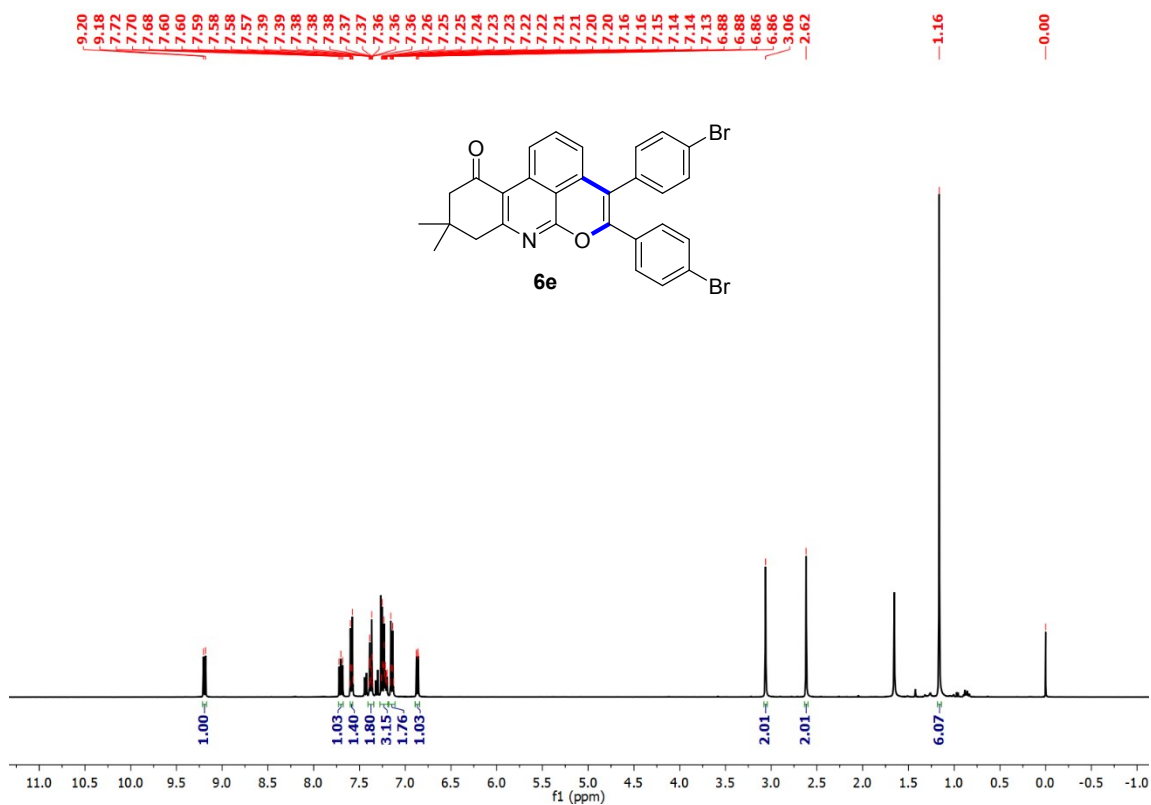

**<sup>1</sup>H NMR spectrum of compound 6e in CDCl<sub>3</sub>**

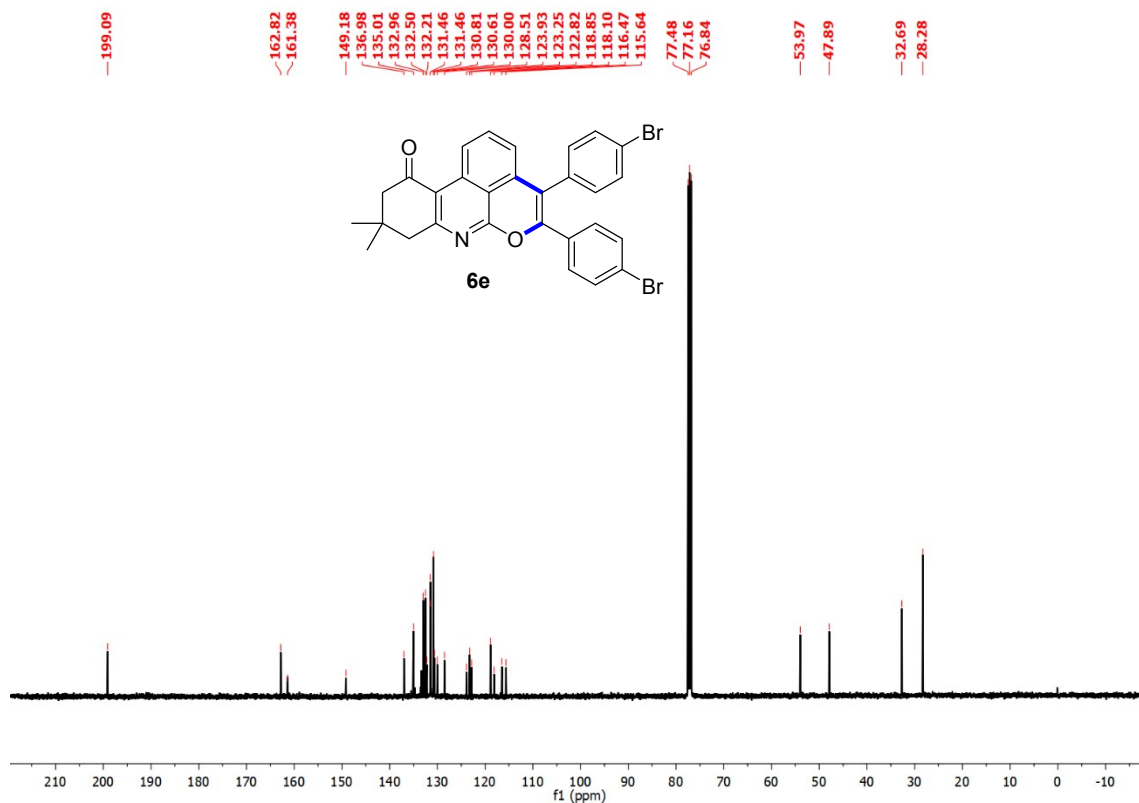

**<sup>13</sup>C NMR spectrum of compound 6e in CDCl<sub>3</sub>**

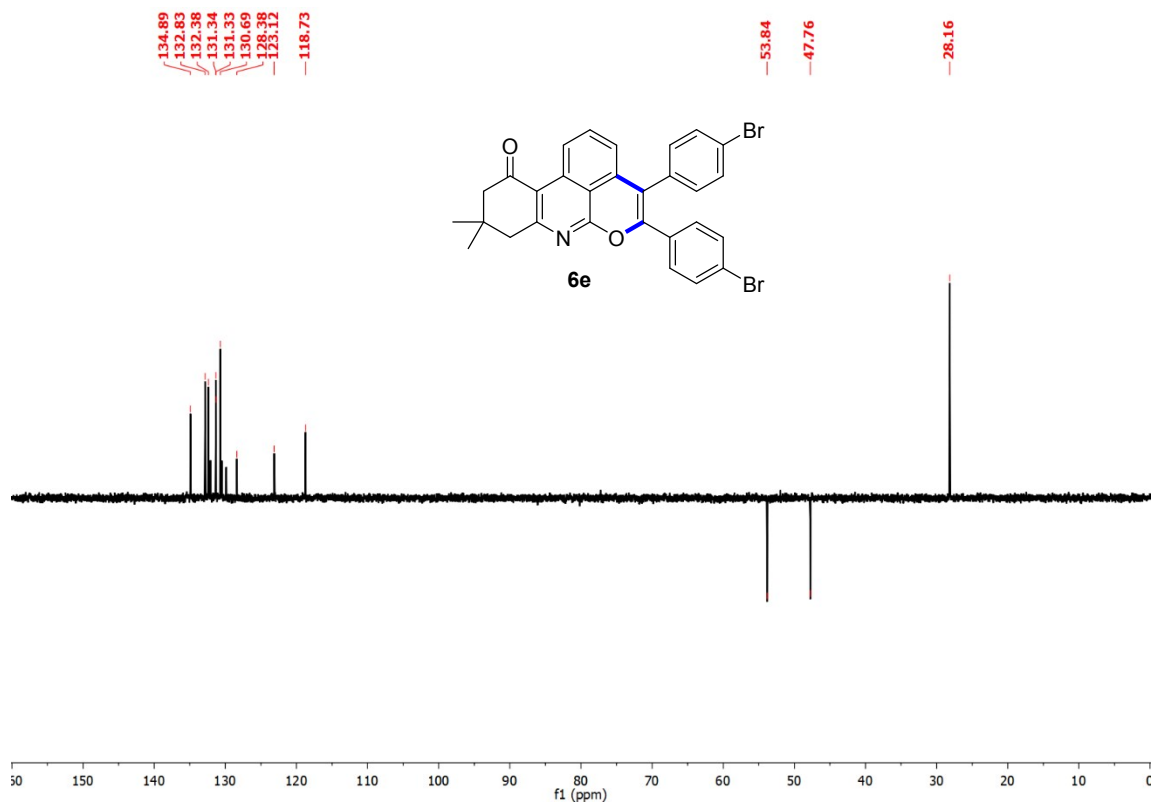

DEPT-135 NMR spectrum of compound 6e in CDCl<sub>3</sub>

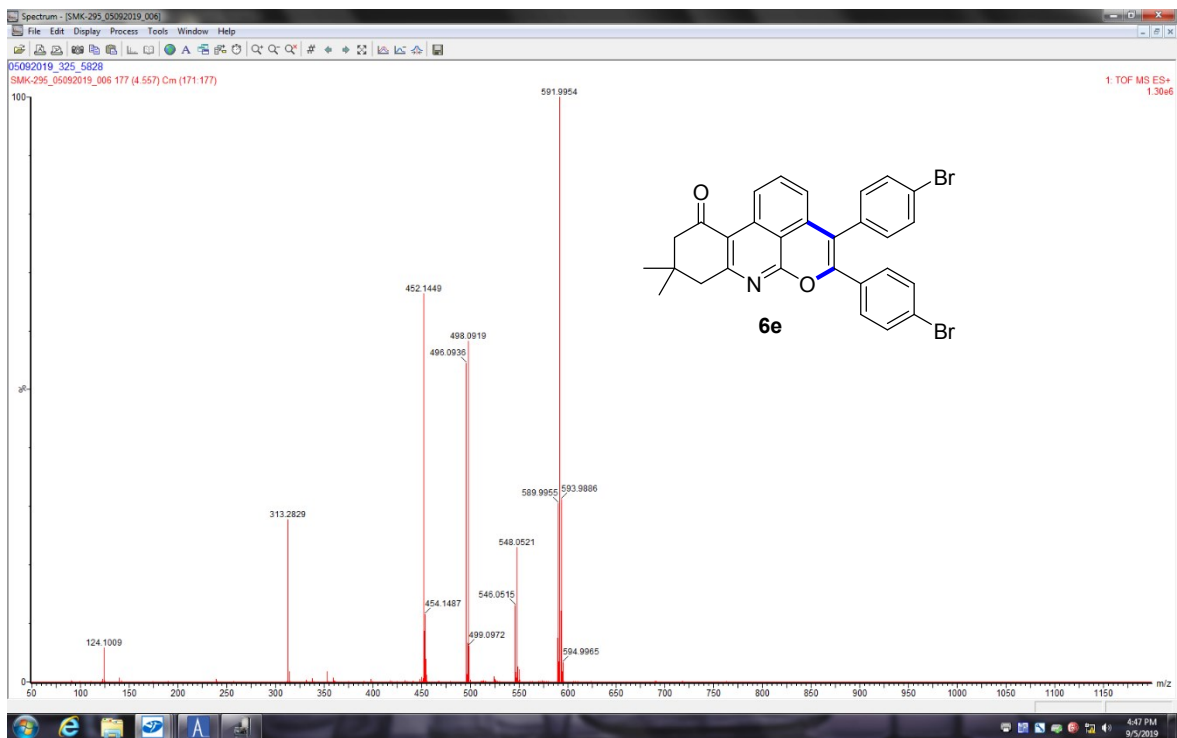

HRMS spectrum of compound 6e

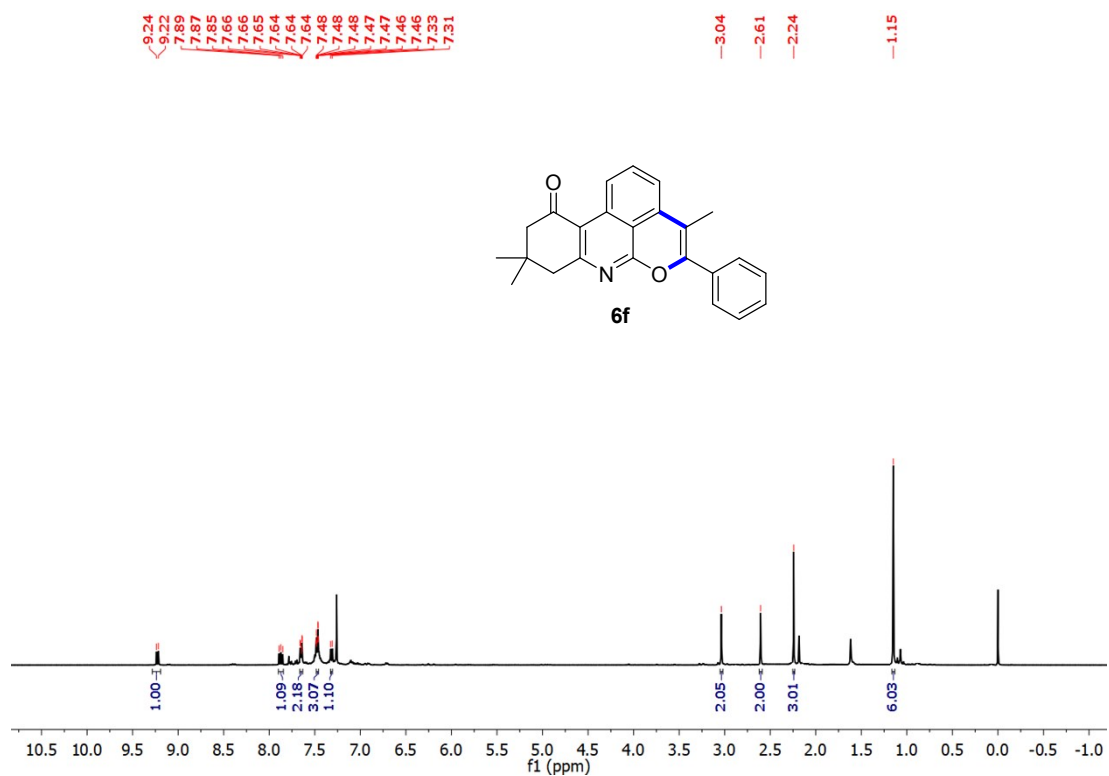

<sup>1</sup>H NMR spectrum of compound 6f in CDCl<sub>3</sub>

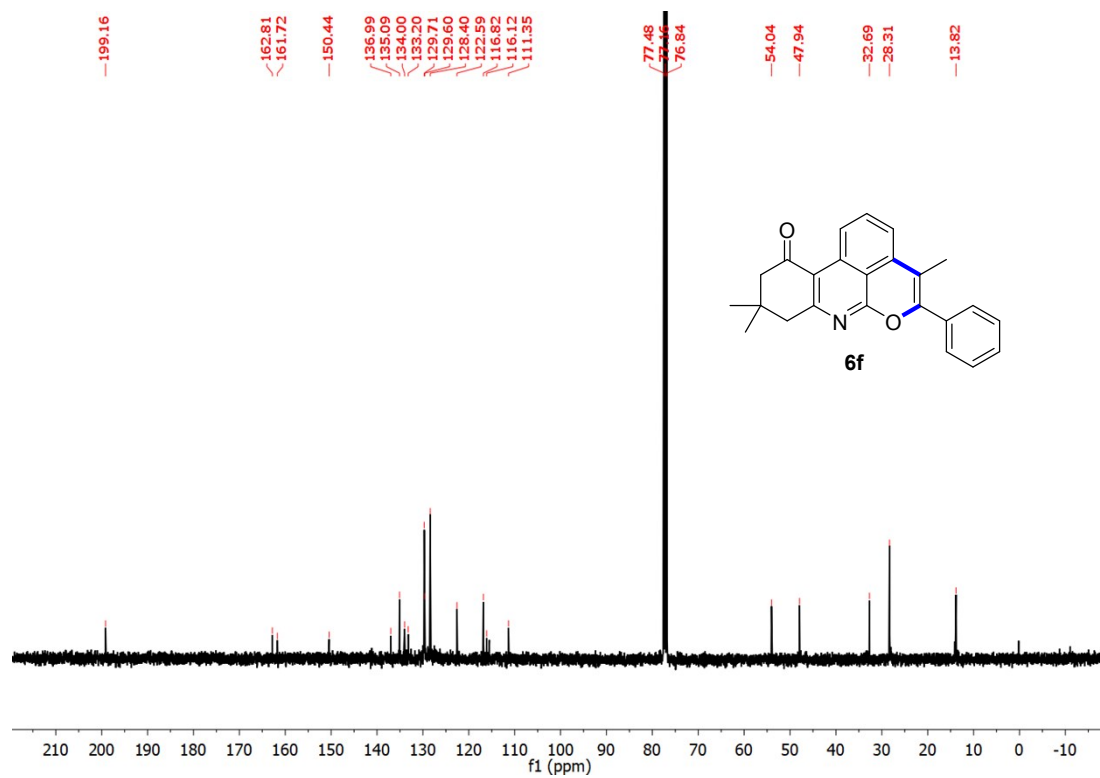

<sup>13</sup>C NMR spectrum of compound 6f in CDCl<sub>3</sub>

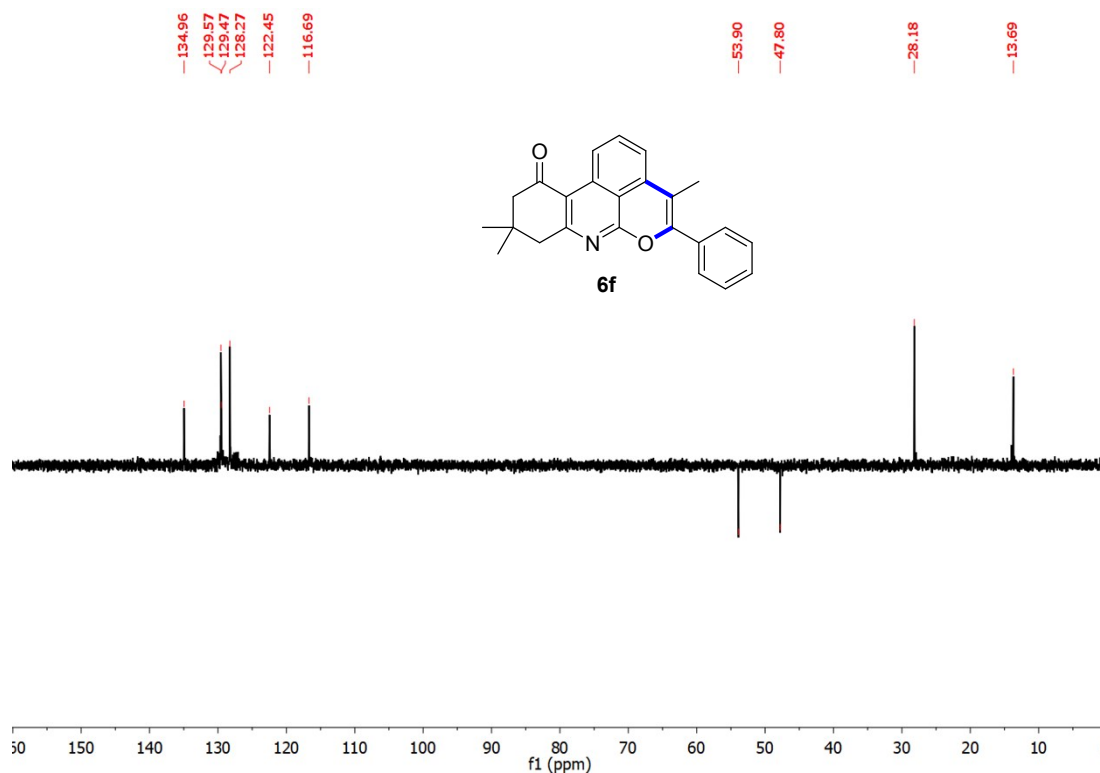

DEPT-135 NMR spectrum of compound 6f in CDCl<sub>3</sub>



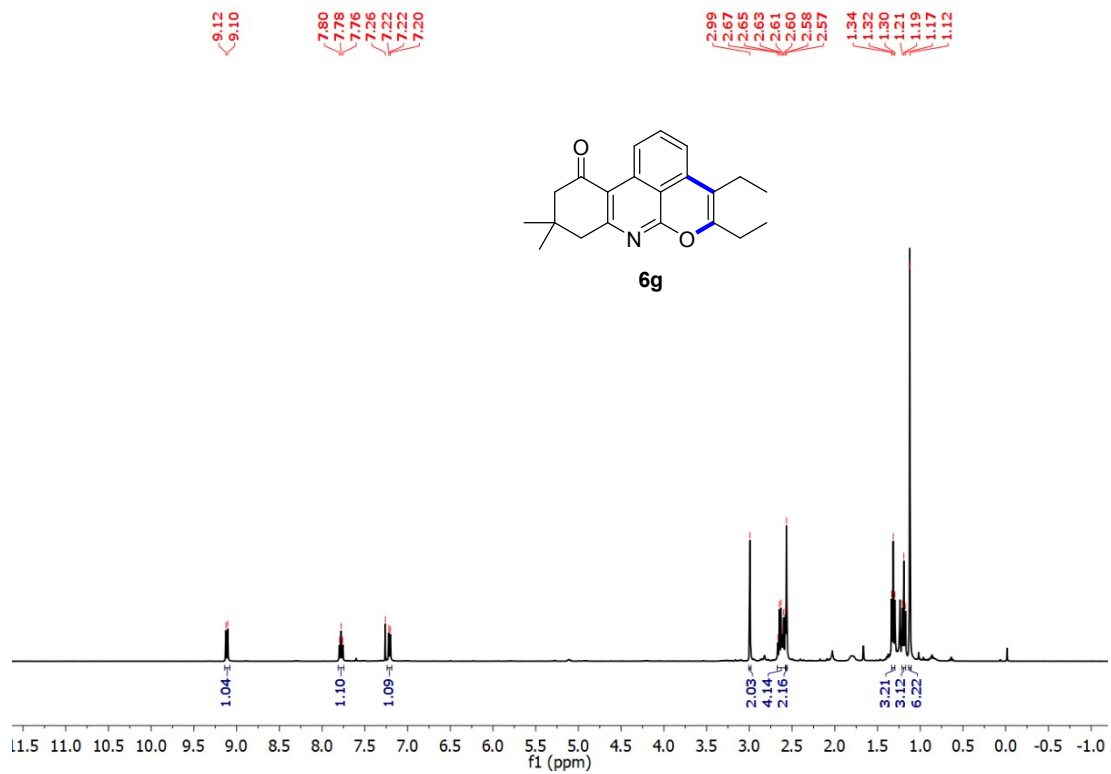

**<sup>1</sup>H NMR spectrum of compound 6g in CDCl<sub>3</sub>**

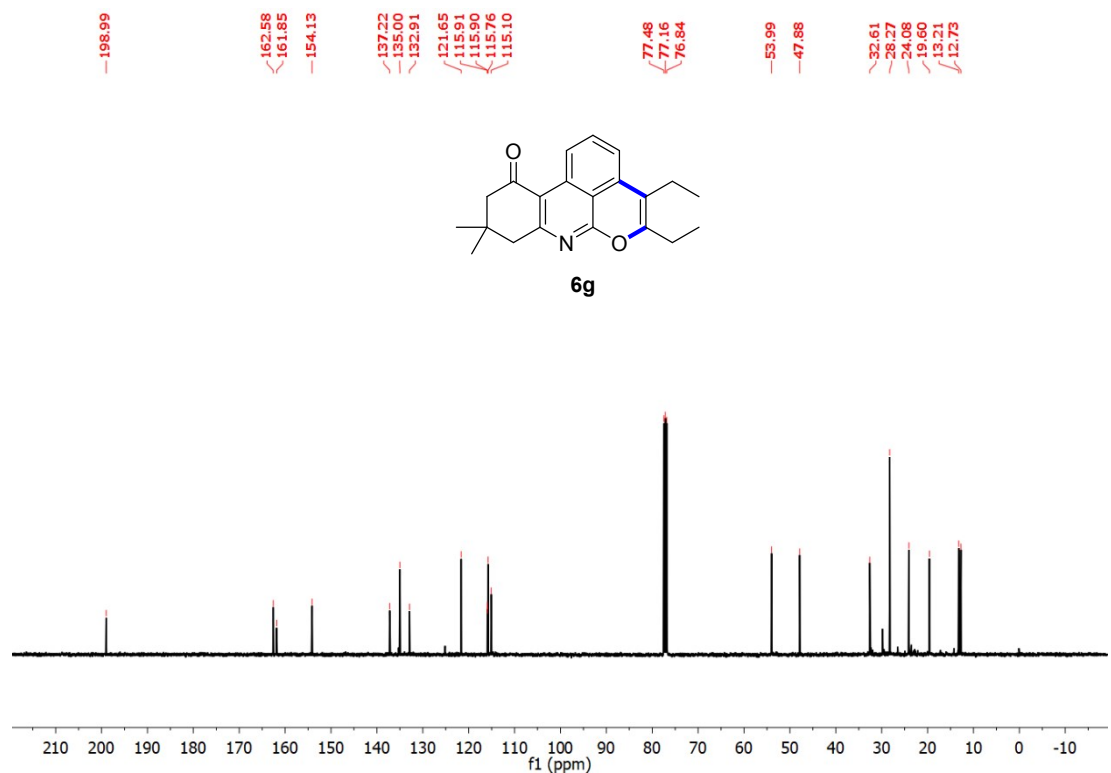

**<sup>13</sup>C NMR spectrum of compound 6g in CDCl<sub>3</sub>**

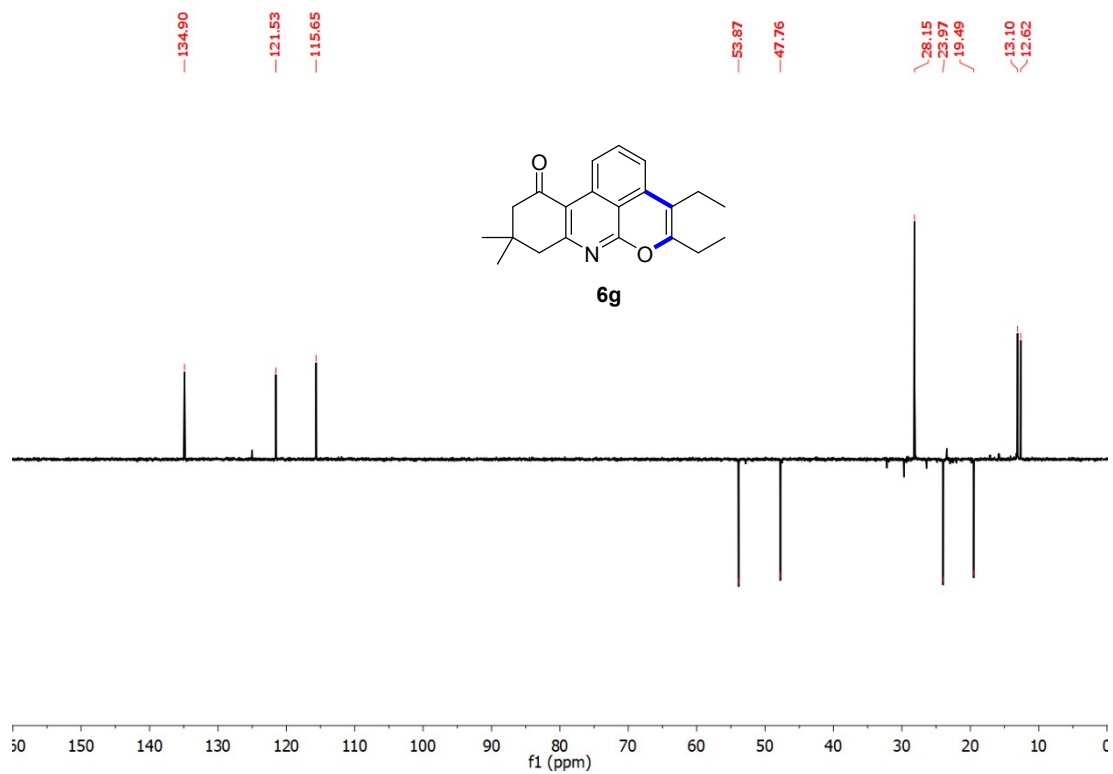

DEPT-135 NMR spectrum of compound 6g in CDCl<sub>3</sub>

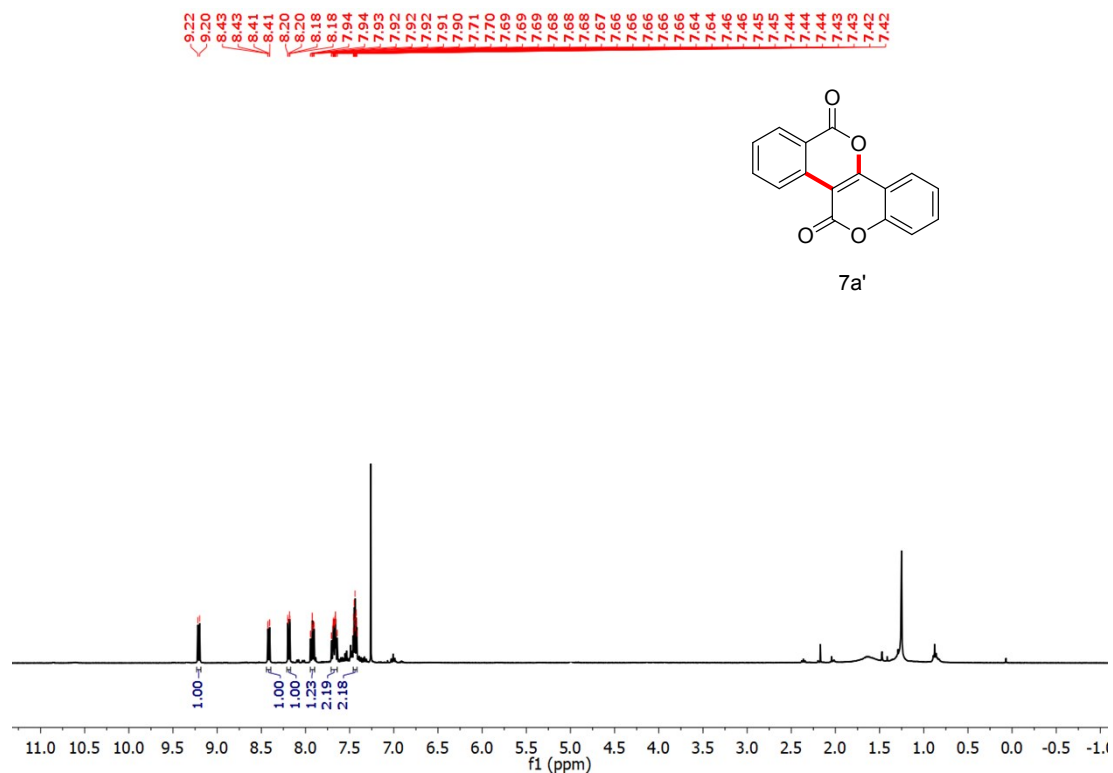

<sup>1</sup>H NMR spectrum of compound 7a' in CDCl<sub>3</sub>

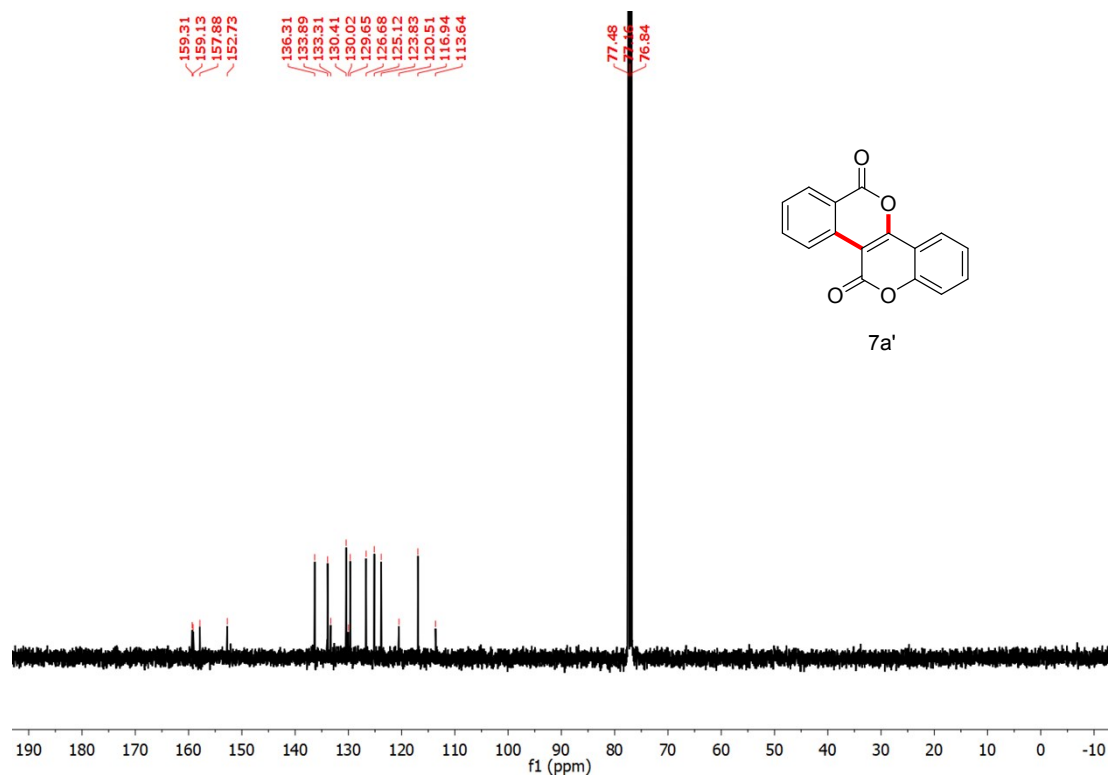

<sup>13</sup>C NMR spectrum of compound 7a' in CDCl<sub>3</sub>

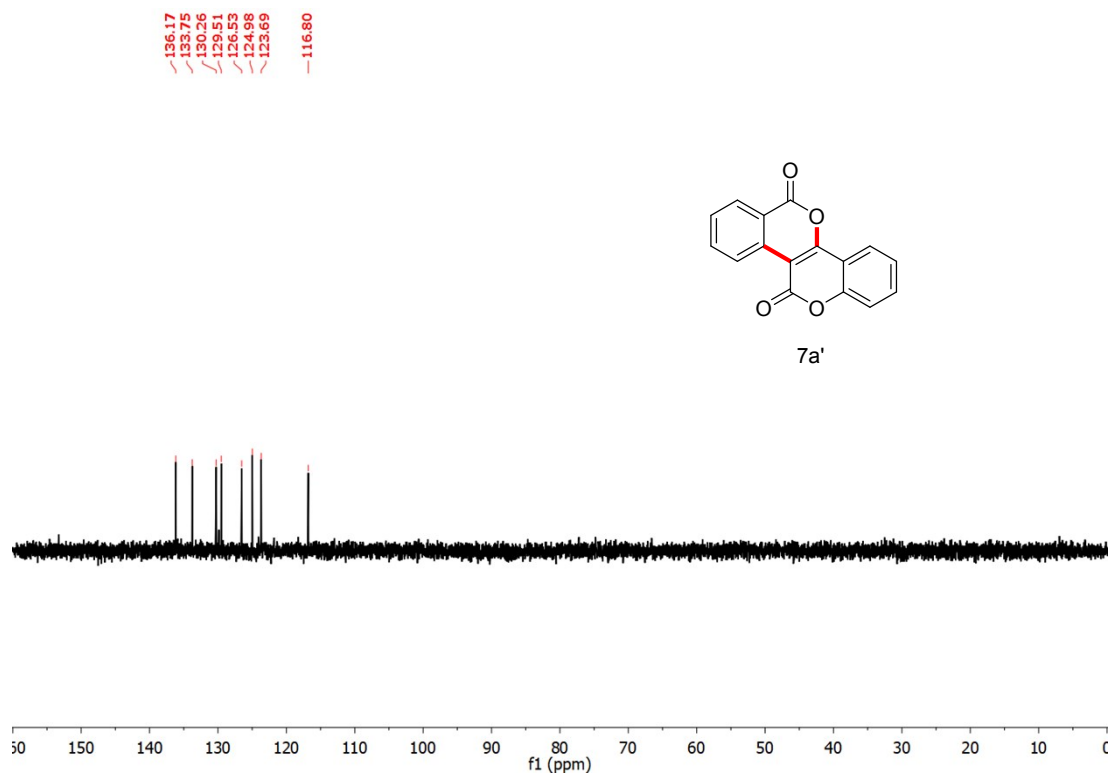

DEPT-135 NMR spectrum of compound 7a' in CDCl<sub>3</sub>

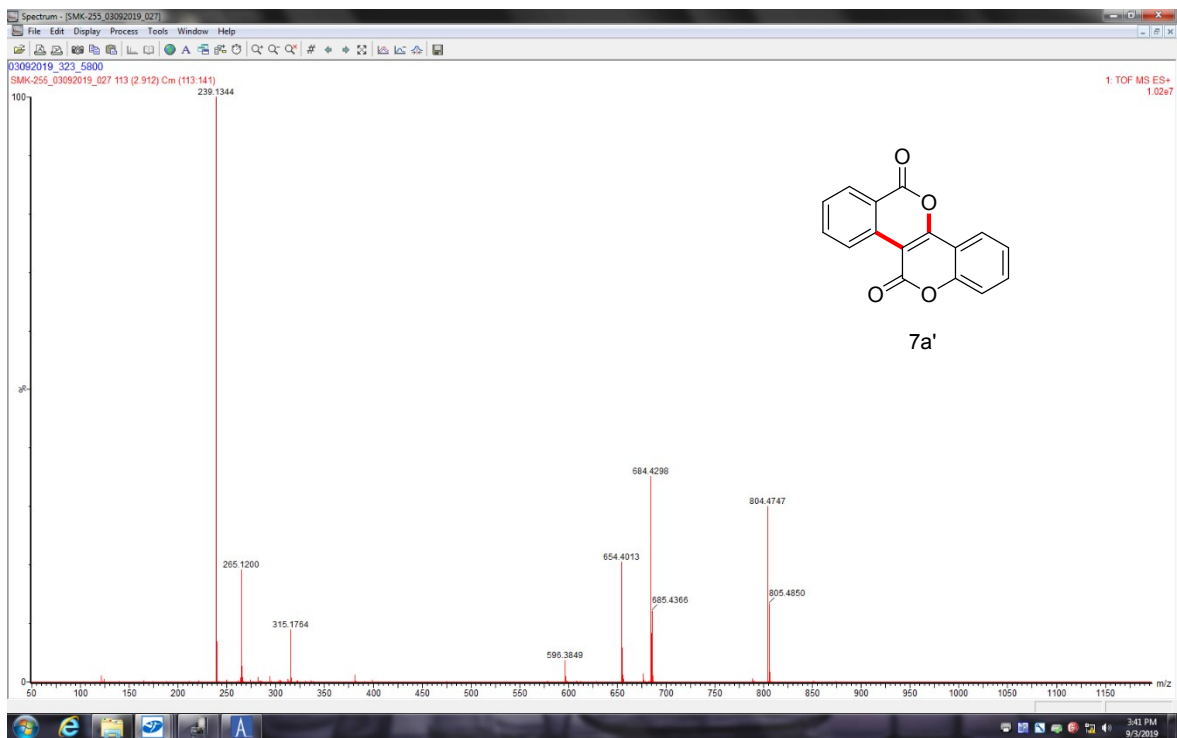

HRMS spectrum of compound 7a'

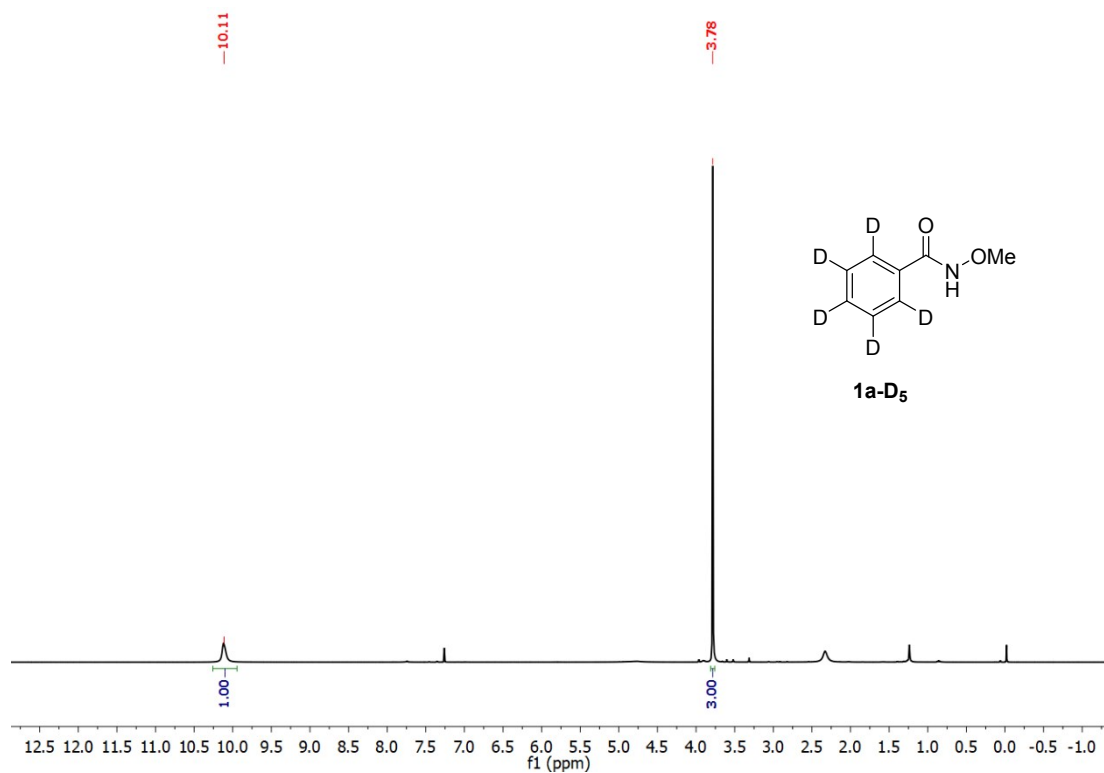

<sup>1</sup>H NMR spectrum of compound 1a-D<sub>5</sub> in CDCl<sub>3</sub>

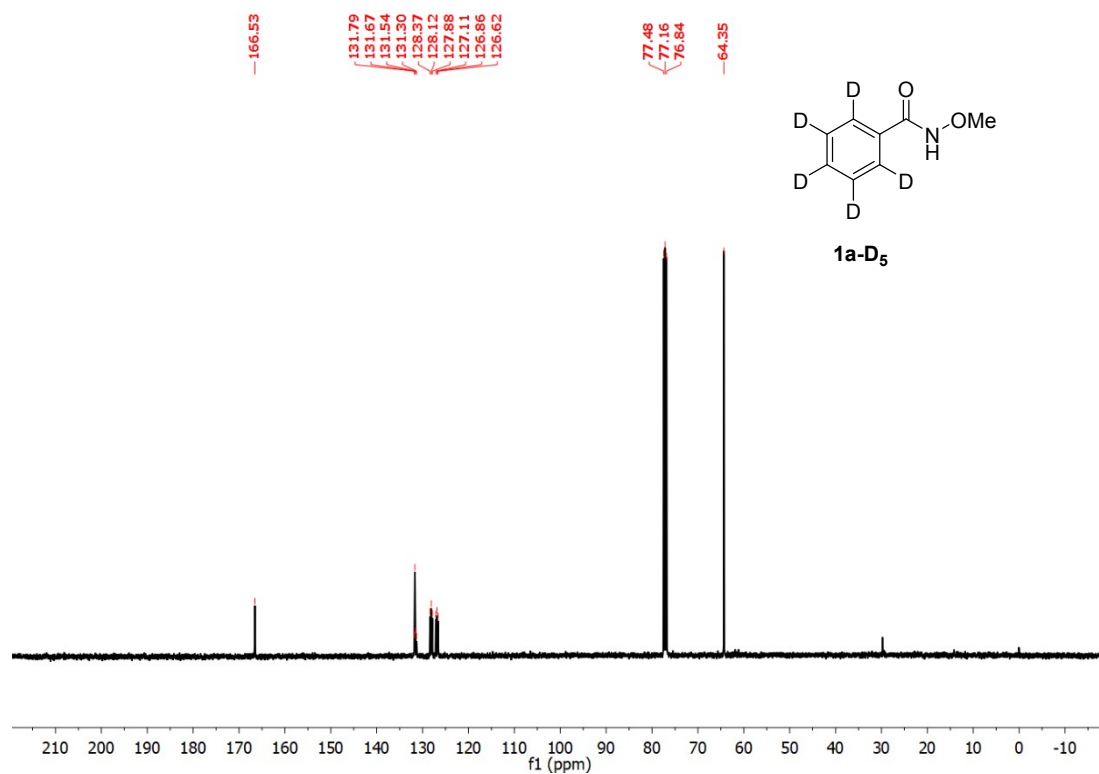

**<sup>13</sup>C NMR spectrum of compound 1a-d<sub>5</sub> in CDCl<sub>3</sub>**

### 30. References

1. Y. Fukui, P. Liu, Q. Liu, Z-T. He, N-Y. Wu, P. Tian, G-Q. Lin. *J. Am. Chem. Soc.* **2014**, *136*, 15607–15614.
2. R. M. Moriarty, S. Tyagi, D. Ivanov, M. Constantinescu. *J. Am. Chem. Soc.*, **2008**, *130*, 7564–7565.
3. M.J. Frisch, G.W. Trucks, H.B. Schlegel, G.E. Scuseria, M.A. Robb, J.R. Cheeseman, G. Scalmani, V. Barone, B. Mennucci, G.A. Petersson, H. Nakatsuji, M. Caricato, X. Li, H.P. Hratchian, A.F. Izmaylov, J. Bloino, G. Zheng, J.L. Sonnenberg, M. Hada, M. Ehara, K. Toyota, R. Fukuda, J. Hasegawa, M. Ishida, T. Nakajima, Y. Honda, O. Kitao, H. Nakai, T. Vreven, J.A. Montgomery, J.E. Peralta, F. Ogliaro, M. Bearpark, J.J. Heyd, E. Brothers, K.N. Kudin, V.N. Staroverov, R. Kobayashi, J. Normand, K. Raghavachari, A. Rendell, J.C. Burant, S.S. Iyengar, J. Tomasi, M. Cossi, N. Rega, J.M. Millam, M. Klene, J.E. Knox, J.B. Cross, V. Bakken, C. Adamo, J. Jaramillo, R. Gomperts, R.E. Stratmann, O. Yazyev, A.J. Austin, R. Cammi, C. Pomelli, J.W. Ochterski, R.L. Martin, K. Morokuma, V.G.Zakrzewski, G.A. Voth, P. Salvador, J.J. Dannenberg, S. Dapprich, A.D.

Daniels, Farkas, J.B. Foresman, J.V. Ortiz, J. Cioslowski, D.J. Fox, Gaussian 09, revision A.02, Wallingford CT, **2009**.

4. Zhao, Y.; Truhlar, D. G. *Theor. Chem. Acc.* **2008**, *120*, 215.
5. Dolg, M.; Wedig, U.; Stoll, H.; Preuss, H. *J. Chem. Phys.* **1987**, *86*, 866
6. Marenich, A. V.; Cramer, C. J.; Truhlar, D. G. *J. Phys. Chem. B* **2009**, *113*, 6378.
